# Supplementary material
Source: publisher figshare collection journal article supplement (https://acs.figshare.com/ndownloader/files/3839146)
Supplement: Supplementary file 1 [file 3839146]

 
data_Fc-tri2
 
_audit_creation_method            SHELXL-2014
_chemical_name_systematic
;
 ?
;
_chemical_name_common             ?
_chemical_melting_point           ?
_chemical_formula_moiety
'C102 H123 Ag2 Fe2 N4 O20 S, B F4, C4 H8 O'
_chemical_formula_sum
'C106 H131 Ag2 B F4 Fe2 N4 O21 S' 
_chemical_formula_weight          2243.45

loop_
 _atom_type_symbol
 _atom_type_description
 _atom_type_scat_dispersion_real
 _atom_type_scat_dispersion_imag
 _atom_type_scat_source
 'C'  'C'   0.0033   0.0016
 'International Tables Vol C Tables 4.2.6.8 and 6.1.1.4'
 'B'  'B'   0.0013   0.0007
 'International Tables Vol C Tables 4.2.6.8 and 6.1.1.4'
 'N'  'N'   0.0061   0.0033
 'International Tables Vol C Tables 4.2.6.8 and 6.1.1.4'
 'O'  'O'   0.0106   0.0060
 'International Tables Vol C Tables 4.2.6.8 and 6.1.1.4'
 'F'  'F'   0.0171   0.0103
 'International Tables Vol C Tables 4.2.6.8 and 6.1.1.4'
 'S'  'S'   0.1246   0.1234
 'International Tables Vol C Tables 4.2.6.8 and 6.1.1.4'
 'Fe'  'Fe'   0.3463   0.8444
 'International Tables Vol C Tables 4.2.6.8 and 6.1.1.4'
 'Ag'  'Ag'  -0.8971   1.1015
 'International Tables Vol C Tables 4.2.6.8 and 6.1.1.4'
 'H'  'H'   0.0000   0.0000
 'International Tables Vol C Tables 4.2.6.8 and 6.1.1.4'
 
_space_group_crystal_system       orthorhombic
_space_group_IT_number            19
_space_group_name_H-M_alt         'P 21 21 21'
_space_group_name_Hall            'P 2ac 2ab'
 
_shelx_space_group_comment
;
The symmetry employed for this shelxl refinement is uniquely defined
by the following loop, which should always be used as a source of
symmetry information in preference to the above space-group names.
They are only intended as comments.
;
 
loop_
 _space_group_symop_operation_xyz
 'x, y, z'
 '-x+1/2, -y, z+1/2'
 'x+1/2, -y+1/2, -z'
 '-x, y+1/2, -z+1/2'
 
_cell_length_a                    13.5851(13)
_cell_length_b                    26.924(3)
_cell_length_c                    27.669(3)
_cell_angle_alpha                 90
_cell_angle_beta                  90
_cell_angle_gamma                 90
_cell_volume                      10120.2(18)
_cell_formula_units_Z             4
_cell_measurement_temperature     90
_cell_measurement_reflns_used     116094
_cell_measurement_theta_min       1.51
_cell_measurement_theta_max       25.64
 
_exptl_crystal_description       'plate'
_exptl_crystal_colour            'orange'
_exptl_crystal_density_meas       ? 
_exptl_crystal_density_method     ?              
_exptl_crystal_density_diffrn     1.472          
_exptl_crystal_F_000              4664
_exptl_transmission_factor_min    ?                                             
_exptl_transmission_factor_max    ?                                             
_exptl_crystal_size_max           0.230
_exptl_crystal_size_mid           0.090
_exptl_crystal_size_min           0.030
_exptl_absorpt_coefficient_mu     0.763
_shelx_estimated_absorpt_T_min    0.844
_shelx_estimated_absorpt_T_max    0.977
_exptl_absorpt_correction_type   'multi-scan'
_exptl_absorpt_correction_T_min   0.80916
_exptl_absorpt_correction_T_max   0.91595
_exptl_absorpt_process_details
;
 MULABS - Empirical Correction for Absorption Anisotropy.
 [c.f. R.H. Blessing, Acta Cryst. (1995), A51, 33-38]
;
 
_exptl_special_details
;
 ?
;
 
_diffrn_ambient_temperature       90
_diffrn_radiation_wavelength      0.71073
_diffrn_radiation_type            MoK\a
_diffrn_source                   'fine-focus rotating anode'
_diffrn_measurement_device_type  'Rigaku AFC-8 with Saturn70 CCD'
_diffrn_measurement_method       '\w-scan'
_diffrn_detector_area_resol_mean  7.31
_diffrn_reflns_number             115856
_diffrn_reflns_av_unetI/netI      0.1327
_diffrn_reflns_av_R_equivalents   0.1368
_diffrn_reflns_limit_h_min        -16
_diffrn_reflns_limit_h_max        16
_diffrn_reflns_limit_k_min        -32
_diffrn_reflns_limit_k_max        32
_diffrn_reflns_limit_l_min        -33
_diffrn_reflns_limit_l_max        33
_diffrn_reflns_theta_min          1.513
_diffrn_reflns_theta_max          25.636
_diffrn_reflns_theta_full         25.242
_diffrn_measured_fraction_theta_max   0.991
_diffrn_measured_fraction_theta_full  0.999
_diffrn_reflns_Laue_measured_fraction_max    0.991
_diffrn_reflns_Laue_measured_fraction_full   0.999
_diffrn_reflns_point_group_measured_fraction_max   0.944
_diffrn_reflns_point_group_measured_fraction_full  0.950
_reflns_number_total              18060
_reflns_number_gt                 8740
_reflns_threshold_expression      'I > 2\s(I)'
_reflns_Friedel_coverage          0.750
_reflns_Friedel_fraction_max      0.887
_reflns_Friedel_fraction_full     0.891
 
_reflns_special_details
;
 Reflections were merged by SHELXL according to the crystal
 class for the calculation of statistics and refinement.
 
 _reflns_Friedel_fraction is defined as the number of unique
 Friedel pairs measured divided by the number that would be
 possible theoretically, ignoring centric projections and
 systematic absences.
;
 
_computing_data_collection       'CrystalClear'
_computing_cell_refinement       'HKL2000'
_computing_data_reduction        'HKL2000'
_computing_structure_solution    'SIR2011'
_computing_structure_refinement  'SHELXL-2014 (Sheldrick, 2014)'
_computing_molecular_graphics    'SV'
_computing_publication_material  'SHELXL-2014 (Sheldrick, 2014)'
 
_refine_special_details
;
 ?
;
_refine_ls_structure_factor_coef  Fsqd
_refine_ls_matrix_type            full
_refine_ls_weighting_scheme       calc
_refine_ls_weighting_details
'w=1/[\s^2^(Fo^2^)+(0.1586P)^2^] where P=(Fo^2^+2Fc^2^)/3'
_atom_sites_solution_primary      direct
_atom_sites_solution_secondary    difmap
_atom_sites_solution_hydrogens    geom
_refine_ls_hydrogen_treatment     constr
_refine_ls_extinction_method      none
_refine_ls_extinction_coef        .
_refine_ls_abs_structure_details
;
 Flack x determined using 2561 quotients [(I+)-(I-)]/[(I+)+(I-)]
 (Parsons, Flack and Wagner, Acta Cryst. B69 (2013) 249-259).
;
_refine_ls_abs_structure_Flack    -0.01(2)
_chemical_absolute_configuration  'adrm'
_refine_ls_number_reflns          18060
_refine_ls_number_parameters      1218
_refine_ls_number_restraints      203
_refine_ls_R_factor_all           0.1854
_refine_ls_R_factor_gt            0.0877
_refine_ls_wR_factor_ref          0.2821
_refine_ls_wR_factor_gt           0.2220
_refine_ls_goodness_of_fit_ref    1.005
_refine_ls_restrained_S_all       0.999
_refine_ls_shift/su_max           0.000
_refine_ls_shift/su_mean          0.000
 
loop_
 _atom_site_label
 _atom_site_type_symbol
 _atom_site_fract_x
 _atom_site_fract_y
 _atom_site_fract_z
 _atom_site_U_iso_or_equiv
 _atom_site_adp_type
 _atom_site_occupancy
 _atom_site_site_symmetry_order  
 _atom_site_calc_flag
 _atom_site_refinement_flags_posn
 _atom_site_refinement_flags_adp
 _atom_site_refinement_flags_occupancy
 _atom_site_disorder_assembly
 _atom_site_disorder_group
Ag1 Ag 0.51284(9) 0.40606(4) 0.50428(5) 0.0608(4) Uani 1 1 d . . . . .
Ag2 Ag 0.28032(10) 0.39845(5) 0.47619(6) 0.0657(4) Uani 1 1 d . . . . .
Fe1 Fe 0.37324(18) -0.02980(9) 0.58299(12) 0.0693(8) Uani 1 1 d . . . . .
Fe2 Fe 0.37152(18) 0.83917(9) 0.42376(11) 0.0641(7) Uani 1 1 d . . . . .
S1 S 0.4232(4) 0.38129(19) 0.3673(2) 0.0672(13) Uani 1 1 d . . . . .
O1 O 0.4857(9) 0.2117(4) 0.4544(6) 0.072(4) Uani 1 1 d . . . . .
O2 O 0.3565(12) 0.1779(5) 0.3775(6) 0.092(4) Uani 1 1 d . . . . .
O3 O 0.1835(13) 0.0847(6) 0.3410(6) 0.103(5) Uani 1 1 d . . . . .
O4 O 0.1019(12) -0.0122(7) 0.3504(7) 0.108(5) Uani 1 1 d . . . . .
O13 O 0.2709(9) 0.5913(4) 0.5348(4) 0.063(3) Uani 1 1 d . . . . .
O14 O 0.3707(10) 0.6374(5) 0.6149(5) 0.078(4) Uani 1 1 d . . . . .
O15 O 0.4836(16) 0.7461(6) 0.6631(6) 0.141(8) Uani 1 1 d D . . . .
N1 N 0.5087(9) 0.3286(5) 0.5199(7) 0.062(4) Uani 1 1 d . . . . .
N2 N 0.2660(9) 0.3208(5) 0.4922(6) 0.058(4) Uani 1 1 d . . . . .
N3 N 0.5155(9) 0.4849(4) 0.4943(6) 0.052(3) Uani 1 1 d . . . . .
N4 N 0.2667(10) 0.4766(5) 0.4664(6) 0.057(4) Uani 1 1 d . . . . .
C1 C 0.5027(10) 0.2949(6) 0.4838(7) 0.056(4) Uani 1 1 d . . . . .
H1 H 0.5026 0.3068 0.4515 0.067 Uiso 1 1 calc R U . . .
C2 C 0.4965(10) 0.2441(6) 0.4909(8) 0.061(5) Uani 1 1 d . . . . .
C3 C 0.5022(13) 0.2248(7) 0.5392(8) 0.070(6) Uani 1 1 d . . . . .
C4 C 0.5095(13) 0.2619(6) 0.5745(7) 0.059(4) Uani 1 1 d . . . . .
H4 H 0.5122 0.2517 0.6073 0.070 Uiso 1 1 calc R U . . .
C5 C 0.5130(13) 0.3105(7) 0.5653(8) 0.063(5) Uani 1 1 d . . . . .
H5 H 0.5186 0.3330 0.5915 0.075 Uiso 1 1 calc R U . . .
C6 C 0.4984(12) 0.1720(7) 0.5496(7) 0.066(5) Uani 1 1 d . . . . .
C7 C 0.5444(12) 0.1338(7) 0.5192(9) 0.074(6) Uani 1 1 d . . . . .
H7 H 0.5750 0.1422 0.4894 0.089 Uiso 1 1 calc R U . . .
C8 C 0.5415(11) 0.0856(7) 0.5354(8) 0.069(6) Uani 1 1 d . . . . .
H8 H 0.5739 0.0609 0.5167 0.083 Uiso 1 1 calc R U . . .
C9 C 0.4940(13) 0.0711(6) 0.5773(9) 0.074(6) Uani 1 1 d . . . . .
C10 C 0.4463(14) 0.1063(7) 0.6056(8) 0.075(6) Uani 1 1 d . . . . .
H10 H 0.4106 0.0967 0.6336 0.090 Uiso 1 1 calc R U . . .
C11 C 0.4520(13) 0.1560(6) 0.5920(8) 0.064(5) Uani 1 1 d . . . . .
H11 H 0.4231 0.1802 0.6126 0.077 Uiso 1 1 calc R U . . .
C12 C 0.4918(11) 0.0180(6) 0.5876(8) 0.065(5) Uani 1 1 d . . . . .
C13 C 0.5145(11) -0.0231(6) 0.5565(10) 0.085(7) Uani 1 1 d . . . . .
H13 H 0.5338 -0.0212 0.5235 0.102 Uiso 1 1 calc R U . . .
C14 C 0.5024(16) -0.0687(8) 0.5853(15) 0.111(10) Uani 1 1 d . . . . .
H14 H 0.5131 -0.1016 0.5739 0.133 Uiso 1 1 calc R U . . .
C15 C 0.4718(18) -0.0554(8) 0.6332(13) 0.104(9) Uani 1 1 d . . . . .
H15 H 0.4601 -0.0775 0.6593 0.124 Uiso 1 1 calc R U . . .
C16 C 0.4625(14) -0.0032(8) 0.6340(9) 0.081(6) Uani 1 1 d . . . . .
H16 H 0.4403 0.0155 0.6610 0.098 Uiso 1 1 calc R U . . .
C17 C 0.2618(11) 0.2864(6) 0.4595(7) 0.051(4) Uani 1 1 d . . . . .
H17 H 0.2656 0.2963 0.4266 0.061 Uiso 1 1 calc R U . . .
C18 C 0.2522(12) 0.2369(7) 0.4691(9) 0.067(6) Uani 1 1 d . . . . .
H18 H 0.2472 0.2143 0.4429 0.081 Uiso 1 1 calc R U . . .
C19 C 0.2494(11) 0.2182(7) 0.5179(8) 0.062(5) Uani 1 1 d . . . . .
C20 C 0.2565(11) 0.2576(7) 0.5541(5) 0.065(5) Uani 1 1 d D . . . .
C21 C 0.2668(13) 0.3057(7) 0.5396(7) 0.059(4) Uani 1 1 d . . . . .
H21 H 0.2751 0.3303 0.5639 0.070 Uiso 1 1 calc R U . . .
C22 C 0.2448(12) 0.1660(7) 0.5282(8) 0.065(5) Uani 1 1 d . . . . .
C23 C 0.2957(11) 0.1329(7) 0.4979(7) 0.059(4) Uani 1 1 d . . . . .
H23 H 0.3312 0.1459 0.4712 0.070 Uiso 1 1 calc R U . . .
C24 C 0.2961(12) 0.0825(6) 0.5056(7) 0.060(4) Uani 1 1 d . . . . .
H24 H 0.3285 0.0610 0.4835 0.072 Uiso 1 1 calc R U . . .
C25 C 0.2463(11) 0.0623(6) 0.5479(7) 0.054(4) Uani 1 1 d . . . . .
C26 C 0.1959(11) 0.0973(6) 0.5766(6) 0.057(4) Uani 1 1 d . . . . .
H26 H 0.1614 0.0856 0.6042 0.068 Uiso 1 1 calc R U . . .
C27 C 0.1940(12) 0.1466(6) 0.5669(7) 0.056(4) Uani 1 1 d . . . . .
H27 H 0.1571 0.1681 0.5871 0.067 Uiso 1 1 calc R U . . .
C28 C 0.2520(11) 0.0114(7) 0.5590(7) 0.058(5) Uani 1 1 d . . . . .
C29 C 0.2776(11) -0.0285(6) 0.5248(8) 0.065(5) Uani 1 1 d . . . . .
H29 H 0.2946 -0.0248 0.4917 0.078 Uiso 1 1 calc R U . . .
C30 C 0.2714(13) -0.0748(6) 0.5523(9) 0.065(6) Uani 1 1 d . . . . .
H30 H 0.2841 -0.1069 0.5395 0.078 Uiso 1 1 calc R U . . .
C31 C 0.2443(13) -0.0649(7) 0.5998(10) 0.075(6) Uani 1 1 d . . . . .
H31 H 0.2341 -0.0886 0.6248 0.090 Uiso 1 1 calc R U . . .
C32 C 0.2346(12) -0.0110(7) 0.6038(7) 0.066(5) Uani 1 1 d . . . . .
H32 H 0.2186 0.0064 0.6326 0.080 Uiso 1 1 calc R U . . .
C33 C 0.4854(14) 0.2304(7) 0.4065(8) 0.070(5) Uani 1 1 d . . . . .
H33A H 0.5501 0.2451 0.3985 0.084 Uiso 1 1 calc R U . . .
H33B H 0.4343 0.2564 0.4028 0.084 Uiso 1 1 calc R U . . .
C34 C 0.464(2) 0.1879(9) 0.3742(10) 0.106(9) Uani 1 1 d . . . . .
H34A H 0.5020 0.1583 0.3845 0.127 Uiso 1 1 calc R U . . .
H34B H 0.4826 0.1961 0.3405 0.127 Uiso 1 1 calc R U . . .
C35 C 0.3236(19) 0.1368(10) 0.3529(11) 0.109(9) Uani 1 1 d . . . . .
H35A H 0.3614 0.1072 0.3631 0.131 Uiso 1 1 calc R U . . .
H35B H 0.3337 0.1415 0.3177 0.131 Uiso 1 1 calc R U . . .
C36 C 0.217(2) 0.1290(9) 0.3630(9) 0.096(7) Uani 1 1 d . . . . .
H36A H 0.2060 0.1271 0.3984 0.115 Uiso 1 1 calc R U . . .
H36B H 0.1784 0.1575 0.3505 0.115 Uiso 1 1 calc R U . . .
C37 C 0.087(2) 0.0741(10) 0.3539(9) 0.106(9) Uani 1 1 d . . . . .
H37A H 0.0436 0.1023 0.3449 0.127 Uiso 1 1 calc R U . . .
H37B H 0.0823 0.0694 0.3893 0.127 Uiso 1 1 calc R U . . .
C38 C 0.053(2) 0.0300(9) 0.3299(10) 0.108(8) Uani 1 1 d . . . . .
H38A H -0.0186 0.0266 0.3338 0.129 Uiso 1 1 calc R U . . .
H38B H 0.0685 0.0322 0.2950 0.129 Uiso 1 1 calc R U . . .
C39 C 0.069(2) -0.0620(10) 0.3327(11) 0.119(9) Uani 1 1 d . . . . .
H39A H 0.0024 -0.0687 0.3441 0.178 Uiso 1 1 calc R U . . .
H39B H 0.1140 -0.0876 0.3451 0.178 Uiso 1 1 calc R U . . .
H39C H 0.0704 -0.0624 0.2973 0.178 Uiso 1 1 calc R U . . .
O5 O 0.2571(10) 0.2418(4) 0.5995(4) 0.070(4) Uani 1 1 d D . . . .
C40 C 0.265(4) 0.2795(5) 0.6355(5) 0.168(6) Uani 0.616(14) 1 d D . P A 1
H40A H 0.2148 0.3054 0.6298 0.201 Uiso 0.616(14) 1 calc R U P A 1
H40B H 0.3309 0.2952 0.6336 0.201 Uiso 0.616(14) 1 calc R U P A 1
C41 C 0.250(3) 0.2566(9) 0.6856(4) 0.168(6) Uani 0.616(14) 1 d D . P A 1
H41A H 0.2496 0.2831 0.7103 0.201 Uiso 0.616(14) 1 calc R U P A 1
H41B H 0.1865 0.2390 0.6867 0.201 Uiso 0.616(14) 1 calc R U P A 1
O6 O 0.328(2) 0.2227(10) 0.6954(9) 0.168(6) Uani 0.616(14) 1 d D . P A 1
C42 C 0.310(3) 0.1979(8) 0.7401(9) 0.168(6) Uani 0.616(14) 1 d D . P A 1
H42A H 0.2888 0.2223 0.7647 0.201 Uiso 0.616(14) 1 calc R U P A 1
H42B H 0.3710 0.1817 0.7516 0.201 Uiso 0.616(14) 1 calc R U P A 1
C43 C 0.230(2) 0.1588(8) 0.7330(14) 0.168(6) Uani 0.616(14) 1 d D . P A 1
H43A H 0.1665 0.1713 0.7462 0.201 Uiso 0.616(14) 1 calc R U P A 1
H43B H 0.2204 0.1523 0.6980 0.201 Uiso 0.616(14) 1 calc R U P A 1
O7 O 0.257(3) 0.1141(6) 0.7570(9) 0.168(6) Uani 0.616(14) 1 d D . P A 1
C44 C 0.1958(18) 0.0744(7) 0.7407(15) 0.168(6) Uani 0.616(14) 1 d D . P A 1
H44A H 0.1513 0.0864 0.7149 0.201 Uiso 0.616(14) 1 calc R U P A 1
H44B H 0.1548 0.0620 0.7677 0.201 Uiso 0.616(14) 1 calc R U P A 1
C45 C 0.260(2) 0.0323(7) 0.7213(14) 0.168(6) Uani 0.616(14) 1 d D . P A 1
H45A H 0.2807 0.0398 0.6877 0.201 Uiso 0.616(14) 1 calc R U P A 1
H45B H 0.3202 0.0291 0.7414 0.201 Uiso 0.616(14) 1 calc R U P A 1
O8 O 0.206(2) -0.0131(7) 0.7223(12) 0.168(6) Uani 0.616(14) 1 d D . P A 1
C46 C 0.272(3) -0.0538(9) 0.7278(18) 0.168(6) Uani 0.616(14) 1 d D . P A 1
H46A H 0.3225 -0.0524 0.7023 0.252 Uiso 0.616(14) 1 calc R U P A 1
H46B H 0.2360 -0.0851 0.7254 0.252 Uiso 0.616(14) 1 calc R U P A 1
H46C H 0.3045 -0.0517 0.7595 0.252 Uiso 0.616(14) 1 calc R U P A 1
C40B C 0.270(5) 0.2793(6) 0.6354(4) 0.168(6) Uani 0.384(14) 1 d D . P A 2
H40C H 0.2170 0.3046 0.6321 0.201 Uiso 0.384(14) 1 calc R U P A 2
H40D H 0.3338 0.2960 0.6308 0.201 Uiso 0.384(14) 1 calc R U P A 2
C41B C 0.265(3) 0.2558(10) 0.6856(4) 0.168(6) Uani 0.384(14) 1 d D . P A 2
H41C H 0.3234 0.2345 0.6908 0.201 Uiso 0.384(14) 1 calc R U P A 2
H41D H 0.2650 0.2822 0.7106 0.201 Uiso 0.384(14) 1 calc R U P A 2
O6B O 0.178(3) 0.2267(10) 0.6898(15) 0.168(6) Uani 0.384(14) 1 d D . P A 2
C42B C 0.191(4) 0.1900(9) 0.7264(10) 0.168(6) Uani 0.384(14) 1 d D . P A 2
H42C H 0.1609 0.2015 0.7570 0.201 Uiso 0.384(14) 1 calc R U P A 2
H42D H 0.2619 0.1845 0.7320 0.201 Uiso 0.384(14) 1 calc R U P A 2
C43B C 0.142(4) 0.1414(9) 0.710(2) 0.168(6) Uani 0.384(14) 1 d D . P A 2
H43C H 0.0728 0.1408 0.7213 0.201 Uiso 0.384(14) 1 calc R U P A 2
H43D H 0.1429 0.1391 0.6747 0.201 Uiso 0.384(14) 1 calc R U P A 2
O7B O 0.194(2) 0.1004(9) 0.7306(17) 0.168(6) Uani 0.384(14) 1 d D . P A 2
C44B C 0.127(2) 0.0612(11) 0.741(2) 0.168(6) Uani 0.384(14) 1 d D . P A 2
H44C H 0.1003 0.0474 0.7105 0.201 Uiso 0.384(14) 1 calc R U P A 2
H44D H 0.0710 0.0742 0.7602 0.201 Uiso 0.384(14) 1 calc R U P A 2
C45B C 0.180(3) 0.0203(13) 0.7694(17) 0.168(6) Uani 0.384(14) 1 d D . P A 2
H45C H 0.1944 0.0322 0.8025 0.201 Uiso 0.384(14) 1 calc R U P A 2
H45D H 0.1367 -0.0093 0.7718 0.201 Uiso 0.384(14) 1 calc R U P A 2
O8B O 0.269(3) 0.0075(19) 0.7453(14) 0.168(6) Uani 0.384(14) 1 d D . P A 2
C46B C 0.339(3) -0.010(2) 0.780(2) 0.168(6) Uani 0.384(14) 1 d D . P A 2
H46D H 0.3285 0.0074 0.8107 0.252 Uiso 0.384(14) 1 calc R U P A 2
H46E H 0.4057 -0.0028 0.7681 0.252 Uiso 0.384(14) 1 calc R U P A 2
H46F H 0.3310 -0.0456 0.7844 0.252 Uiso 0.384(14) 1 calc R U P A 2
C47 C 0.5091(12) 0.5025(6) 0.4483(7) 0.055(4) Uani 1 1 d . . . . .
H47 H 0.5056 0.4795 0.4224 0.066 Uiso 1 1 calc R U . . .
C48 C 0.5075(11) 0.5534(7) 0.4379(7) 0.056(4) Uani 1 1 d . . . . .
C49 C 0.5142(10) 0.5877(5) 0.4764(7) 0.048(4) Uani 1 1 d . . . . .
C50 C 0.5209(14) 0.5672(6) 0.5220(8) 0.063(5) Uani 1 1 d . . . . .
H50 H 0.5230 0.5890 0.5490 0.075 Uiso 1 1 calc R U . . .
C51 C 0.5245(13) 0.5171(6) 0.5303(8) 0.060(5) Uani 1 1 d . . . . .
H51 H 0.5336 0.5053 0.5624 0.072 Uiso 1 1 calc R U . . .
C52 C 0.5125(13) 0.6419(6) 0.4686(6) 0.053(4) Uani 1 1 d . . . . .
C53 C 0.4577(10) 0.6721(6) 0.5016(6) 0.052(4) Uani 1 1 d . . . . .
H53 H 0.4265 0.6573 0.5288 0.063 Uiso 1 1 calc R U . . .
C54 C 0.4507(11) 0.7205(6) 0.4943(6) 0.049(4) Uani 1 1 d . . . . .
H54 H 0.4115 0.7392 0.5162 0.059 Uiso 1 1 calc R U . . .
C55 C 0.4967(12) 0.7458(6) 0.4571(7) 0.063(5) Uani 1 1 d . . . . .
C56 C 0.5554(12) 0.7158(6) 0.4247(7) 0.063(5) Uani 1 1 d . . . . .
H56 H 0.5901 0.7309 0.3987 0.075 Uiso 1 1 calc R U . . .
C57 C 0.5607(13) 0.6650(7) 0.4316(7) 0.064(5) Uani 1 1 d . . . . .
H57 H 0.5990 0.6456 0.4099 0.076 Uiso 1 1 calc R U . . .
C58 C 0.4899(13) 0.7997(6) 0.4489(7) 0.060(4) Uani 1 1 d . . . . .
C59 C 0.4587(13) 0.8336(7) 0.4830(10) 0.083(7) Uani 1 1 d . . . . .
H59 H 0.4374 0.8253 0.5147 0.100 Uiso 1 1 calc R U . . .
C60 C 0.4630(15) 0.8836(7) 0.4640(11) 0.087(7) Uani 1 1 d . . . . .
H60 H 0.4457 0.9136 0.4800 0.105 Uiso 1 1 calc R U . . .
C61 C 0.4996(14) 0.8778(7) 0.4149(11) 0.094(8) Uani 1 1 d . . . . .
H61 H 0.5110 0.9035 0.3922 0.112 Uiso 1 1 calc R U . . .
C62 C 0.5149(12) 0.8262(6) 0.4076(9) 0.072(6) Uani 1 1 d . . . . .
H62 H 0.5390 0.8118 0.3785 0.086 Uiso 1 1 calc R U . . .
C63 C 0.2707(12) 0.5079(6) 0.5037(8) 0.060(5) Uani 1 1 d . . . . .
H63 H 0.2770 0.4948 0.5354 0.072 Uiso 1 1 calc R U . . .
C64 C 0.2660(12) 0.5596(6) 0.4975(7) 0.054(4) Uani 1 1 d . . . . .
C65 C 0.2542(11) 0.5814(7) 0.4500(7) 0.059(5) Uani 1 1 d . . . . .
C66 C 0.2501(10) 0.5452(6) 0.4133(7) 0.052(4) Uani 1 1 d . . . . .
H66 H 0.2423 0.5561 0.3808 0.063 Uiso 1 1 calc R U . . .
C67 C 0.2566(12) 0.4960(7) 0.4216(7) 0.058(5) Uani 1 1 d . . . . .
H67 H 0.2540 0.4740 0.3948 0.070 Uiso 1 1 calc R U . . .
C68 C 0.2535(11) 0.6339(6) 0.4417(6) 0.050(4) Uani 1 1 d . . . . .
C69 C 0.2021(11) 0.6686(6) 0.4720(7) 0.058(4) Uani 1 1 d . . . . .
H69 H 0.1688 0.6572 0.5001 0.070 Uiso 1 1 calc R U . . .
C70 C 0.2009(11) 0.7175(6) 0.4605(6) 0.049(4) Uani 1 1 d . . . . .
H70 H 0.1620 0.7393 0.4795 0.058 Uiso 1 1 calc R U . . .
C71 C 0.2543(11) 0.7371(6) 0.4221(7) 0.057(4) Uani 1 1 d . . . . .
C72 C 0.3056(12) 0.7034(6) 0.3924(6) 0.053(4) Uani 1 1 d . . . . .
H72 H 0.3414 0.7153 0.3652 0.064 Uiso 1 1 calc R U . . .
C73 C 0.3042(11) 0.6530(7) 0.4026(6) 0.053(4) Uani 1 1 d . . . . .
H73 H 0.3392 0.6309 0.3821 0.064 Uiso 1 1 calc R U . . .
C74 C 0.2574(12) 0.7904(7) 0.4126(7) 0.062(5) Uani 1 1 d . . . . .
C75 C 0.2267(12) 0.8291(6) 0.4439(7) 0.063(5) Uani 1 1 d . . . . .
H75 H 0.2009 0.8252 0.4756 0.075 Uiso 1 1 calc R U . . .
C76 C 0.2413(15) 0.8741(6) 0.4198(8) 0.069(5) Uani 1 1 d . . . . .
H76 H 0.2277 0.9059 0.4332 0.083 Uiso 1 1 calc R U . . .
C77 C 0.2793(16) 0.8659(6) 0.3726(9) 0.072(6) Uani 1 1 d . . . . .
H77 H 0.2963 0.8900 0.3489 0.087 Uiso 1 1 calc R U . . .
C78 C 0.2856(13) 0.8156(7) 0.3690(7) 0.061(5) Uani 1 1 d . . . . .
H78 H 0.3066 0.7989 0.3406 0.073 Uiso 1 1 calc R U . . .
O9 O 0.4998(8) 0.5707(3) 0.3929(4) 0.053(3) Uani 1 1 d D . . . .
C79 C 0.4898(14) 0.5364(4) 0.3539(4) 0.065(5) Uani 1 1 d D . . . .
H79A H 0.4261 0.5188 0.3563 0.078 Uiso 1 1 calc R U . . .
H79B H 0.5433 0.5115 0.3551 0.078 Uiso 1 1 calc R U . . .
C80 C 0.4949(11) 0.5654(6) 0.3064(5) 0.077(6) Uani 1 1 d D . . . .
H80A H 0.5508 0.5890 0.3066 0.092 Uiso 1 1 calc R U . . .
H80B H 0.5024 0.5426 0.2785 0.092 Uiso 1 1 calc R U . . .
O10 O 0.4033(10) 0.5911(5) 0.3041(5) 0.098(5) Uani 1 1 d D . . . .
C81 C 0.3953(17) 0.6162(9) 0.2589(7) 0.236(11) Uani 0.55(2) 1 d D . P B 3
H81A H 0.3336 0.6062 0.2425 0.283 Uiso 0.55(2) 1 calc R U P B 3
H81B H 0.4513 0.6069 0.2378 0.283 Uiso 0.55(2) 1 calc R U P B 3
C82 C 0.395(2) 0.6723(8) 0.2673(16) 0.236(11) Uani 0.55(2) 1 d D . P B 3
H82A H 0.3446 0.6882 0.2469 0.283 Uiso 0.55(2) 1 calc R U P B 3
H82B H 0.3799 0.6795 0.3016 0.283 Uiso 0.55(2) 1 calc R U P B 3
O11 O 0.490(3) 0.6920(12) 0.256(2) 0.236(11) Uani 0.55(2) 1 d D . P B 3
C83 C 0.490(2) 0.7443(10) 0.264(3) 0.236(11) Uani 0.55(2) 1 d D . P B 3
H83A H 0.4415 0.7528 0.2892 0.283 Uiso 0.55(2) 1 calc R U P B 3
H83B H 0.4722 0.7620 0.2339 0.283 Uiso 0.55(2) 1 calc R U P B 3
C84 C 0.593(3) 0.7605(13) 0.280(3) 0.236(11) Uani 0.55(2) 1 d D . P B 3
H84A H 0.5997 0.7948 0.2678 0.283 Uiso 0.55(2) 1 calc R U P B 3
H84B H 0.5870 0.7640 0.3158 0.283 Uiso 0.55(2) 1 calc R U P B 3
O12 O 0.688(3) 0.7393(19) 0.2735(18) 0.236(11) Uani 0.55(2) 1 d D . P B 3
C85 C 0.708(4) 0.704(2) 0.311(2) 0.236(11) Uani 0.55(2) 1 d D . P B 3
H85A H 0.6918 0.7194 0.3424 0.354 Uiso 0.55(2) 1 calc R U P B 3
H85B H 0.7773 0.6951 0.3104 0.354 Uiso 0.55(2) 1 calc R U P B 3
H85C H 0.6670 0.6748 0.3062 0.354 Uiso 0.55(2) 1 calc R U P B 3
C81B C 0.3985(16) 0.6192(10) 0.2605(8) 0.236(11) Uani 0.45(2) 1 d D . P B 4
H81C H 0.3292 0.6221 0.2498 0.283 Uiso 0.45(2) 1 calc R U P B 4
H81D H 0.4363 0.6022 0.2348 0.283 Uiso 0.45(2) 1 calc R U P B 4
C82B C 0.441(2) 0.6710(7) 0.2692(19) 0.236(11) Uani 0.45(2) 1 d D . P B 4
H82C H 0.4084 0.6954 0.2479 0.283 Uiso 0.45(2) 1 calc R U P B 4
H82D H 0.4299 0.6811 0.3031 0.283 Uiso 0.45(2) 1 calc R U P B 4
O11B O 0.544(2) 0.6705(12) 0.259(2) 0.236(11) Uani 0.45(2) 1 d D . P B 4
C83B C 0.590(3) 0.7121(14) 0.282(2) 0.236(11) Uani 0.45(2) 1 d D . P B 4
H83C H 0.6604 0.7049 0.2881 0.283 Uiso 0.45(2) 1 calc R U P B 4
H83D H 0.5580 0.7186 0.3137 0.283 Uiso 0.45(2) 1 calc R U P B 4
C84B C 0.580(4) 0.7577(12) 0.250(2) 0.236(11) Uani 0.45(2) 1 d D . P B 4
H84C H 0.6360 0.7811 0.2537 0.283 Uiso 0.45(2) 1 calc R U P B 4
H84D H 0.5734 0.7487 0.2151 0.283 Uiso 0.45(2) 1 calc R U P B 4
O12B O 0.491(4) 0.7768(16) 0.269(3) 0.236(11) Uani 0.45(2) 1 d D . P B 4
C85B C 0.499(6) 0.8294(15) 0.275(3) 0.236(11) Uani 0.45(2) 1 d D . P B 4
H85D H 0.5361 0.8372 0.3039 0.354 Uiso 0.45(2) 1 calc R U P B 4
H85E H 0.4327 0.8438 0.2769 0.354 Uiso 0.45(2) 1 calc R U P B 4
H85F H 0.5327 0.8433 0.2464 0.354 Uiso 0.45(2) 1 calc R U P B 4
C86 C 0.2712(18) 0.5739(7) 0.5823(8) 0.077(6) Uani 1 1 d . . . . .
H86A H 0.3301 0.5530 0.5877 0.093 Uiso 1 1 calc R U . . .
H86B H 0.2121 0.5532 0.5879 0.093 Uiso 1 1 calc R U . . .
C87 C 0.2717(18) 0.6179(7) 0.6178(7) 0.076(6) Uani 1 1 d . . . . .
H87A H 0.2228 0.6433 0.6082 0.092 Uiso 1 1 calc R U . . .
H87B H 0.2566 0.6066 0.6511 0.092 Uiso 1 1 calc R U . . .
C88 C 0.375(2) 0.6853(10) 0.6358(9) 0.106(8) Uani 1 1 d . . . . .
H88A H 0.3514 0.6838 0.6697 0.128 Uiso 1 1 calc R U . . .
H88B H 0.3318 0.7083 0.6177 0.128 Uiso 1 1 calc R U . . .
C89 C 0.480(2) 0.7039(7) 0.6346(10) 0.138(12) Uani 1 1 d D . . . .
H89A H 0.5257 0.6783 0.6473 0.166 Uiso 1 1 calc R U . . .
H89B H 0.5000 0.7119 0.6010 0.166 Uiso 1 1 calc R U . . .
C90 C 0.535(3) 0.7856(7) 0.6402(7) 0.155(8) Uani 0.67(3) 1 d D . P C 5
H90A H 0.4913 0.8030 0.6173 0.185 Uiso 0.67(3) 1 calc R U P C 5
H90B H 0.5919 0.7721 0.6218 0.185 Uiso 0.67(3) 1 calc R U P C 5
C91 C 0.5724(19) 0.8221(9) 0.6785(12) 0.155(8) Uani 0.67(3) 1 d D . P C 5
H91A H 0.6202 0.8054 0.7000 0.185 Uiso 0.67(3) 1 calc R U P C 5
H91B H 0.6061 0.8504 0.6627 0.185 Uiso 0.67(3) 1 calc R U P C 5
O16 O 0.4911(19) 0.8399(10) 0.7062(9) 0.155(8) Uani 0.67(3) 1 d D . P C 5
C92 C 0.526(3) 0.8649(16) 0.7481(10) 0.155(8) Uani 0.67(3) 1 d D . P C 5
H92A H 0.5986 0.8642 0.7484 0.232 Uiso 0.67(3) 1 calc R U P C 5
H92B H 0.5015 0.8482 0.7771 0.232 Uiso 0.67(3) 1 calc R U P C 5
H92C H 0.5036 0.8994 0.7478 0.232 Uiso 0.67(3) 1 calc R U P C 5
C90B C 0.562(3) 0.7783(13) 0.6497(15) 0.155(8) Uani 0.33(3) 1 d D . P C 6
H90C H 0.5588 0.7854 0.6147 0.185 Uiso 0.33(3) 1 calc R U P C 6
H90D H 0.6261 0.7620 0.6565 0.185 Uiso 0.33(3) 1 calc R U P C 6
C91B C 0.555(3) 0.8267(8) 0.6784(11) 0.155(8) Uani 0.33(3) 1 d D . P C 6
H91C H 0.6052 0.8505 0.6668 0.185 Uiso 0.33(3) 1 calc R U P C 6
H91D H 0.4892 0.8419 0.6734 0.185 Uiso 0.33(3) 1 calc R U P C 6
O16B O 0.569(6) 0.8168(13) 0.7285(11) 0.155(8) Uani 0.33(3) 1 d D . P C 6
C92B C 0.599(7) 0.861(2) 0.7524(15) 0.155(8) Uani 0.33(3) 1 d D . P C 6
H92D H 0.6406 0.8810 0.7307 0.232 Uiso 0.33(3) 1 calc R U P C 6
H92E H 0.6365 0.8527 0.7816 0.232 Uiso 0.33(3) 1 calc R U P C 6
H92F H 0.5408 0.8805 0.7614 0.232 Uiso 0.33(3) 1 calc R U P C 6
O17 O 0.4341(9) 0.3901(5) 0.4168(5) 0.071(3) Uani 1 1 d . . . . .
O18 O 0.4686(12) 0.4173(5) 0.3364(5) 0.090(4) Uani 1 1 d . . . . .
O19 O 0.4400(11) 0.3309(5) 0.3524(5) 0.084(4) Uani 1 1 d . . . . .
O20 O 0.3065(10) 0.3906(5) 0.3620(5) 0.077(4) Uani 1 1 d . . . . .
C93 C 0.2593(19) 0.3758(9) 0.3152(9) 0.094(7) Uani 1 1 d . . . . .
H93 H 0.3116 0.3694 0.2905 0.113 Uiso 1 1 calc R U . . .
C94 C 0.1974(15) 0.4163(11) 0.2990(7) 0.094(8) Uani 1 1 d . . . . .
H94 H 0.1511 0.4235 0.3262 0.113 Uiso 1 1 calc R U . . .
C95 C 0.1338(19) 0.4022(11) 0.2563(9) 0.110(8) Uani 1 1 d . . . . .
H95A H 0.0867 0.4293 0.2493 0.132 Uiso 1 1 calc R U . . .
H95B H 0.1756 0.3973 0.2274 0.132 Uiso 1 1 calc R U . . .
C96 C 0.0790(19) 0.3556(10) 0.2672(8) 0.093(7) Uani 1 1 d . . . . .
H96A H 0.0393 0.3463 0.2385 0.111 Uiso 1 1 calc R U . . .
H96B H 0.0329 0.3619 0.2942 0.111 Uiso 1 1 calc R U . . .
C97 C 0.144(2) 0.3126(10) 0.2803(9) 0.103(8) Uani 1 1 d . . . . .
H97 H 0.1918 0.3084 0.2531 0.124 Uiso 1 1 calc R U . . .
C98 C 0.2027(19) 0.3298(8) 0.3235(8) 0.088(6) Uani 1 1 d . . . . .
H98A H 0.1571 0.3352 0.3509 0.106 Uiso 1 1 calc R U . . .
H98B H 0.2489 0.3030 0.3329 0.106 Uiso 1 1 calc R U . . .
C99 C 0.2573(18) 0.4654(9) 0.2902(8) 0.089(7) Uani 1 1 d . . . . .
H99 H 0.3012 0.4706 0.3188 0.107 Uiso 1 1 calc R U . . .
C100 C 0.1881(19) 0.5136(9) 0.2849(9) 0.099(8) Uani 1 1 d . . . . .
H10A H 0.2218 0.5425 0.2986 0.149 Uiso 1 1 calc R U . . .
H10B H 0.1262 0.5080 0.3022 0.149 Uiso 1 1 calc R U . . .
H10C H 0.1743 0.5196 0.2506 0.149 Uiso 1 1 calc R U . . .
C101 C 0.323(2) 0.4628(9) 0.2446(10) 0.120(11) Uani 1 1 d . . . . .
H10D H 0.3638 0.4328 0.2459 0.180 Uiso 1 1 calc R U . . .
H10E H 0.3656 0.4921 0.2433 0.180 Uiso 1 1 calc R U . . .
H10F H 0.2814 0.4618 0.2157 0.180 Uiso 1 1 calc R U . . .
C102 C 0.096(3) 0.2613(14) 0.2890(11) 0.170(18) Uani 1 1 d . . . . .
H10G H 0.1381 0.2416 0.3105 0.256 Uiso 1 1 calc R U . . .
H10H H 0.0887 0.2439 0.2581 0.256 Uiso 1 1 calc R U . . .
H10I H 0.0313 0.2657 0.3039 0.256 Uiso 1 1 calc R U . . .
F1 F 0.3813(13) 0.4181(8) 0.5860(7) 0.154(5) Uani 0.699(17) 1 d D . P D 7
F2 F 0.2208(13) 0.4096(7) 0.5938(7) 0.154(5) Uani 0.699(17) 1 d D . P D 7
F3 F 0.2971(16) 0.4715(6) 0.6300(7) 0.154(5) Uani 0.699(17) 1 d D . P D 7
F4 F 0.3184(17) 0.3949(7) 0.6558(6) 0.154(5) Uani 0.699(17) 1 d D . P D 7
B1 B 0.3044(10) 0.4235(4) 0.6164(4) 0.053(8) Uani 0.699(17) 1 d D . P D 7
F1B F 0.4570(19) 0.4338(15) 0.6061(15) 0.154(5) Uani 0.301(17) 1 d D . P D 8
F2B F 0.309(3) 0.4195(15) 0.5761(10) 0.154(5) Uani 0.301(17) 1 d D . P D 8
F3B F 0.326(3) 0.4667(11) 0.6407(13) 0.154(5) Uani 0.301(17) 1 d D . P D 8
F4B F 0.353(3) 0.3861(11) 0.6456(12) 0.154(5) Uani 0.301(17) 1 d D . P D 8
B1B B 0.3613(18) 0.4265(8) 0.6171(8) 0.053(8) Uani 0.301(17) 1 d D . P D 8
O21 O 0.426(2) 0.0206(12) 0.4203(11) 0.161(8) Uani 0.66(3) 1 d D . P E 9
C103 C 0.360(2) 0.0029(18) 0.3817(13) 0.161(8) Uani 0.66(3) 1 d D . P E 9
H10J H 0.3068 0.0269 0.3740 0.193 Uiso 0.66(3) 1 calc R U P E 9
H10K H 0.3312 -0.0302 0.3888 0.193 Uiso 0.66(3) 1 calc R U P E 9
C104 C 0.438(3) 0.0010(16) 0.3437(10) 0.161(8) Uani 0.66(3) 1 d D . P E 9
H10L H 0.4562 -0.0340 0.3372 0.193 Uiso 0.66(3) 1 calc R U P E 9
H10M H 0.4128 0.0156 0.3133 0.193 Uiso 0.66(3) 1 calc R U P E 9
C105 C 0.528(2) 0.0291(19) 0.3594(11) 0.161(8) Uani 0.66(3) 1 d D . P E 9
H10N H 0.5284 0.0623 0.3441 0.193 Uiso 0.66(3) 1 calc R U P E 9
H10O H 0.5878 0.0111 0.3487 0.193 Uiso 0.66(3) 1 calc R U P E 9
C106 C 0.531(2) 0.0349(18) 0.4133(12) 0.161(8) Uani 0.66(3) 1 d D . P E 9
H10P H 0.5770 0.0117 0.4292 0.193 Uiso 0.66(3) 1 calc R U P E 9
H10Q H 0.5444 0.0695 0.4236 0.193 Uiso 0.66(3) 1 calc R U P E 9
O22 O 0.447(3) -0.012(2) 0.4285(15) 0.161(8) Uani 0.34(3) 1 d D . P E 10
C113 C 0.368(2) 0.006(3) 0.396(2) 0.161(8) Uani 0.34(3) 1 d D . P E 10
H11A H 0.3219 0.0288 0.4122 0.193 Uiso 0.34(3) 1 calc R U P E 10
H11B H 0.3309 -0.0218 0.3806 0.193 Uiso 0.34(3) 1 calc R U P E 10
C114 C 0.437(3) 0.031(2) 0.3618(16) 0.161(8) Uani 0.34(3) 1 d D . P E 10
H11C H 0.4168 0.0241 0.3281 0.193 Uiso 0.34(3) 1 calc R U P E 10
H11D H 0.4328 0.0676 0.3668 0.193 Uiso 0.34(3) 1 calc R U P E 10
C115 C 0.541(3) 0.014(3) 0.3696(16) 0.161(8) Uani 0.34(3) 1 d D . P E 10
H11E H 0.5578 -0.0111 0.3451 0.193 Uiso 0.34(3) 1 calc R U P E 10
H11F H 0.5861 0.0428 0.3653 0.193 Uiso 0.34(3) 1 calc R U P E 10
C116 C 0.554(3) -0.007(3) 0.4192(17) 0.161(8) Uani 0.34(3) 1 d D . P E 10
H11G H 0.5885 -0.0394 0.4190 0.193 Uiso 0.34(3) 1 calc R U P E 10
H11H H 0.5863 0.0162 0.4418 0.193 Uiso 0.34(3) 1 calc R U P E 10
 
loop_
 _atom_site_aniso_label
 _atom_site_aniso_U_11
 _atom_site_aniso_U_22
 _atom_site_aniso_U_33
 _atom_site_aniso_U_23
 _atom_site_aniso_U_13
 _atom_site_aniso_U_12
Ag1 0.0455(7) 0.0451(7) 0.0920(10) 0.0014(7) -0.0060(6) 0.0019(6)
Ag2 0.0475(7) 0.0504(7) 0.0993(11) 0.0044(7) 0.0018(7) 0.0000(6)
Fe1 0.0365(13) 0.0439(14) 0.127(2) 0.0085(15) -0.0124(15) -0.0044(11)
Fe2 0.0434(14) 0.0433(13) 0.106(2) 0.0024(13) 0.0014(14) 0.0027(11)
S1 0.056(3) 0.069(3) 0.076(4) -0.001(3) -0.001(3) -0.001(2)
O1 0.045(7) 0.046(7) 0.125(12) -0.017(8) 0.001(7) 0.001(6)
O2 0.087(11) 0.070(9) 0.118(12) -0.022(8) 0.015(10) -0.019(8)
O3 0.094(11) 0.089(11) 0.125(13) -0.032(10) 0.009(10) -0.016(9)
O4 0.086(11) 0.096(12) 0.140(15) -0.001(11) -0.010(10) -0.020(10)
O13 0.061(7) 0.059(7) 0.068(8) -0.002(7) -0.010(6) 0.007(6)
O14 0.069(9) 0.076(9) 0.087(10) -0.019(7) -0.001(8) -0.014(7)
O15 0.173(19) 0.127(15) 0.122(14) -0.053(12) 0.055(15) -0.063(15)
N1 0.024(6) 0.037(7) 0.125(13) -0.004(8) -0.016(8) 0.003(5)
N2 0.023(6) 0.042(7) 0.110(14) 0.001(8) 0.000(8) -0.001(5)
N3 0.028(6) 0.036(6) 0.092(11) 0.013(7) -0.001(7) 0.001(5)
N4 0.040(7) 0.052(8) 0.079(11) -0.007(8) 0.005(8) -0.004(6)
C1 0.019(7) 0.052(9) 0.097(14) 0.001(9) 0.002(8) -0.004(7)
C2 0.021(7) 0.053(10) 0.110(17) 0.014(11) 0.006(9) 0.002(7)
C3 0.027(8) 0.053(10) 0.130(18) 0.002(11) -0.011(10) 0.009(8)
C4 0.053(10) 0.050(10) 0.074(12) 0.003(9) -0.014(10) -0.008(8)
C5 0.044(10) 0.057(11) 0.087(14) 0.006(10) -0.013(10) -0.003(8)
C6 0.032(9) 0.067(11) 0.099(14) -0.003(10) -0.009(10) -0.001(9)
C7 0.040(9) 0.062(11) 0.120(17) 0.020(11) 0.009(11) 0.002(8)
C8 0.028(8) 0.058(11) 0.121(17) 0.021(11) 0.010(10) 0.011(7)
C9 0.033(9) 0.041(9) 0.148(19) -0.004(11) -0.022(12) -0.003(8)
C10 0.057(11) 0.048(11) 0.121(17) 0.010(11) -0.026(11) -0.017(9)
C11 0.051(10) 0.037(9) 0.106(16) 0.006(9) -0.019(10) -0.002(7)
C12 0.029(8) 0.041(9) 0.124(16) 0.018(10) -0.023(10) -0.008(7)
C13 0.017(7) 0.044(10) 0.19(2) 0.019(12) -0.011(11) -0.005(7)
C14 0.045(12) 0.046(12) 0.24(4) 0.013(17) -0.027(19) 0.000(9)
C15 0.064(15) 0.047(12) 0.20(3) 0.028(15) -0.053(18) -0.010(11)
C16 0.049(11) 0.079(14) 0.116(18) 0.017(13) -0.018(12) -0.008(10)
C17 0.028(8) 0.041(9) 0.083(13) 0.005(8) -0.005(8) -0.011(7)
C18 0.034(9) 0.063(12) 0.105(18) -0.007(11) -0.009(10) -0.012(8)
C19 0.027(8) 0.070(12) 0.088(15) 0.000(11) 0.003(9) 0.011(7)
C20 0.021(8) 0.070(13) 0.105(17) -0.002(12) -0.004(9) 0.008(8)
C21 0.052(11) 0.062(11) 0.062(12) 0.008(9) 0.006(9) 0.007(9)
C22 0.038(9) 0.058(11) 0.100(14) 0.015(11) -0.011(10) -0.002(8)
C23 0.027(8) 0.076(12) 0.072(12) -0.014(10) -0.006(8) 0.001(7)
C24 0.048(9) 0.064(11) 0.068(12) -0.010(9) -0.007(9) -0.006(8)
C25 0.036(9) 0.040(9) 0.085(13) -0.009(8) -0.011(9) -0.005(7)
C26 0.044(9) 0.056(10) 0.070(11) -0.007(9) 0.007(8) -0.003(8)
C27 0.045(9) 0.046(9) 0.077(13) 0.010(8) 0.004(9) -0.002(7)
C28 0.026(8) 0.062(11) 0.086(13) 0.006(10) -0.007(8) -0.005(7)
C29 0.021(7) 0.060(10) 0.115(15) -0.005(11) 0.008(10) -0.015(8)
C30 0.044(9) 0.023(8) 0.130(19) 0.002(9) -0.019(12) -0.001(7)
C31 0.046(11) 0.045(11) 0.13(2) 0.009(11) -0.010(12) -0.008(8)
C32 0.038(9) 0.081(13) 0.080(13) 0.035(10) -0.005(9) 0.007(9)
C33 0.048(10) 0.067(12) 0.094(16) 0.007(11) 0.009(11) 0.000(9)
C34 0.13(2) 0.076(15) 0.116(19) -0.017(14) 0.045(17) -0.014(14)
C35 0.082(17) 0.094(18) 0.15(2) -0.038(17) 0.011(16) -0.024(14)
C36 0.102(18) 0.086(16) 0.099(17) -0.003(12) -0.014(15) -0.024(15)
C37 0.14(2) 0.103(18) 0.077(16) -0.030(13) 0.013(16) -0.043(17)
C38 0.089(17) 0.099(19) 0.13(2) -0.017(17) -0.029(16) -0.002(15)
C39 0.091(18) 0.13(2) 0.14(2) -0.033(19) 0.000(17) -0.025(17)
O5 0.082(10) 0.064(8) 0.064(9) -0.005(6) -0.002(7) 0.002(7)
C40 0.219(17) 0.158(12) 0.127(9) 0.018(8) -0.046(10) 0.042(10)
C41 0.219(17) 0.158(12) 0.127(9) 0.018(8) -0.046(10) 0.042(10)
O6 0.219(17) 0.158(12) 0.127(9) 0.018(8) -0.046(10) 0.042(10)
C42 0.219(17) 0.158(12) 0.127(9) 0.018(8) -0.046(10) 0.042(10)
C43 0.219(17) 0.158(12) 0.127(9) 0.018(8) -0.046(10) 0.042(10)
O7 0.219(17) 0.158(12) 0.127(9) 0.018(8) -0.046(10) 0.042(10)
C44 0.219(17) 0.158(12) 0.127(9) 0.018(8) -0.046(10) 0.042(10)
C45 0.219(17) 0.158(12) 0.127(9) 0.018(8) -0.046(10) 0.042(10)
O8 0.219(17) 0.158(12) 0.127(9) 0.018(8) -0.046(10) 0.042(10)
C46 0.219(17) 0.158(12) 0.127(9) 0.018(8) -0.046(10) 0.042(10)
C40B 0.219(17) 0.158(12) 0.127(9) 0.018(8) -0.046(10) 0.042(10)
C41B 0.219(17) 0.158(12) 0.127(9) 0.018(8) -0.046(10) 0.042(10)
O6B 0.219(17) 0.158(12) 0.127(9) 0.018(8) -0.046(10) 0.042(10)
C42B 0.219(17) 0.158(12) 0.127(9) 0.018(8) -0.046(10) 0.042(10)
C43B 0.219(17) 0.158(12) 0.127(9) 0.018(8) -0.046(10) 0.042(10)
O7B 0.219(17) 0.158(12) 0.127(9) 0.018(8) -0.046(10) 0.042(10)
C44B 0.219(17) 0.158(12) 0.127(9) 0.018(8) -0.046(10) 0.042(10)
C45B 0.219(17) 0.158(12) 0.127(9) 0.018(8) -0.046(10) 0.042(10)
O8B 0.219(17) 0.158(12) 0.127(9) 0.018(8) -0.046(10) 0.042(10)
C46B 0.219(17) 0.158(12) 0.127(9) 0.018(8) -0.046(10) 0.042(10)
C47 0.030(8) 0.053(10) 0.082(13) -0.010(9) -0.011(9) -0.008(7)
C48 0.020(7) 0.079(12) 0.070(13) -0.005(10) 0.003(8) 0.007(8)
C49 0.027(7) 0.043(8) 0.073(11) -0.003(8) -0.003(8) 0.003(6)
C50 0.057(11) 0.058(11) 0.074(13) -0.004(10) -0.004(10) 0.003(9)
C51 0.055(10) 0.037(9) 0.089(13) -0.006(9) -0.002(10) -0.003(8)
C52 0.055(10) 0.055(9) 0.050(10) -0.001(8) -0.004(9) 0.008(8)
C53 0.032(8) 0.058(10) 0.067(11) 0.000(9) -0.011(8) 0.006(7)
C54 0.036(8) 0.046(9) 0.065(11) -0.006(8) 0.001(8) 0.009(6)
C55 0.030(8) 0.060(10) 0.098(14) -0.013(9) -0.003(9) 0.009(8)
C56 0.042(9) 0.049(10) 0.097(14) 0.000(9) -0.009(9) -0.001(8)
C57 0.050(10) 0.055(11) 0.086(14) -0.016(10) 0.015(10) 0.004(8)
C58 0.048(10) 0.042(9) 0.089(13) -0.006(9) -0.001(10) -0.005(8)
C59 0.041(10) 0.058(11) 0.15(2) 0.012(13) -0.007(12) 0.007(8)
C60 0.050(11) 0.041(10) 0.17(2) -0.015(12) -0.016(14) 0.000(8)
C61 0.041(10) 0.046(10) 0.19(3) 0.041(13) 0.015(15) 0.011(8)
C62 0.037(9) 0.036(8) 0.141(18) -0.007(10) 0.021(11) -0.002(7)
C63 0.042(9) 0.060(10) 0.078(13) 0.019(10) -0.002(10) -0.011(8)
C64 0.039(8) 0.052(9) 0.070(12) -0.006(10) 0.001(9) 0.005(7)
C65 0.023(8) 0.072(12) 0.080(13) -0.001(10) 0.001(8) -0.001(7)
C66 0.025(8) 0.050(10) 0.082(13) -0.001(9) 0.002(8) 0.005(6)
C67 0.041(9) 0.077(12) 0.056(12) -0.011(10) 0.000(9) -0.005(8)
C68 0.036(9) 0.050(10) 0.064(11) 0.001(8) 0.001(8) -0.003(7)
C69 0.039(9) 0.059(10) 0.077(12) 0.000(9) -0.010(9) 0.000(8)
C70 0.042(9) 0.058(10) 0.046(10) -0.005(8) -0.003(7) 0.015(7)
C71 0.034(8) 0.063(11) 0.073(12) 0.001(9) -0.004(8) 0.012(7)
C72 0.046(9) 0.051(10) 0.063(12) 0.001(8) 0.002(8) -0.005(8)
C73 0.036(9) 0.085(13) 0.039(10) -0.020(8) -0.011(7) -0.003(8)
C74 0.039(9) 0.069(12) 0.078(13) 0.006(10) -0.013(9) -0.001(8)
C75 0.037(9) 0.059(11) 0.093(13) -0.022(10) 0.006(9) 0.004(8)
C76 0.077(13) 0.041(9) 0.088(15) -0.005(9) -0.005(12) -0.011(9)
C77 0.081(13) 0.028(9) 0.109(17) 0.011(9) -0.020(13) -0.004(9)
C78 0.042(9) 0.069(11) 0.072(12) 0.005(9) 0.002(9) -0.012(9)
O9 0.050(7) 0.046(6) 0.063(8) -0.005(5) -0.004(6) 0.008(5)
C79 0.061(11) 0.052(10) 0.081(13) -0.005(9) -0.007(10) 0.016(9)
C80 0.082(14) 0.082(13) 0.066(12) -0.012(10) -0.012(11) 0.014(12)
O10 0.100(11) 0.094(11) 0.098(11) 0.002(9) 0.003(8) 0.030(10)
C81 0.24(3) 0.21(2) 0.261(19) 0.04(2) 0.01(2) 0.01(2)
C82 0.24(3) 0.21(2) 0.261(19) 0.04(2) 0.01(2) 0.01(2)
O11 0.24(3) 0.21(2) 0.261(19) 0.04(2) 0.01(2) 0.01(2)
C83 0.24(3) 0.21(2) 0.261(19) 0.04(2) 0.01(2) 0.01(2)
C84 0.24(3) 0.21(2) 0.261(19) 0.04(2) 0.01(2) 0.01(2)
O12 0.24(3) 0.21(2) 0.261(19) 0.04(2) 0.01(2) 0.01(2)
C85 0.24(3) 0.21(2) 0.261(19) 0.04(2) 0.01(2) 0.01(2)
C81B 0.24(3) 0.21(2) 0.261(19) 0.04(2) 0.01(2) 0.01(2)
C82B 0.24(3) 0.21(2) 0.261(19) 0.04(2) 0.01(2) 0.01(2)
O11B 0.24(3) 0.21(2) 0.261(19) 0.04(2) 0.01(2) 0.01(2)
C83B 0.24(3) 0.21(2) 0.261(19) 0.04(2) 0.01(2) 0.01(2)
C84B 0.24(3) 0.21(2) 0.261(19) 0.04(2) 0.01(2) 0.01(2)
O12B 0.24(3) 0.21(2) 0.261(19) 0.04(2) 0.01(2) 0.01(2)
C85B 0.24(3) 0.21(2) 0.261(19) 0.04(2) 0.01(2) 0.01(2)
C86 0.073(13) 0.069(12) 0.089(16) 0.022(11) -0.002(13) -0.005(11)
C87 0.100(16) 0.081(13) 0.049(11) -0.013(9) 0.001(11) -0.002(12)
C88 0.12(2) 0.11(2) 0.086(17) -0.019(14) 0.014(16) -0.014(17)
C89 0.14(3) 0.17(3) 0.11(2) -0.04(2) 0.02(2) -0.07(2)
C90 0.17(2) 0.106(13) 0.19(2) -0.017(11) 0.047(17) -0.031(13)
C91 0.17(2) 0.106(13) 0.19(2) -0.017(11) 0.047(17) -0.031(13)
O16 0.17(2) 0.106(13) 0.19(2) -0.017(11) 0.047(17) -0.031(13)
C92 0.17(2) 0.106(13) 0.19(2) -0.017(11) 0.047(17) -0.031(13)
C90B 0.17(2) 0.106(13) 0.19(2) -0.017(11) 0.047(17) -0.031(13)
C91B 0.17(2) 0.106(13) 0.19(2) -0.017(11) 0.047(17) -0.031(13)
O16B 0.17(2) 0.106(13) 0.19(2) -0.017(11) 0.047(17) -0.031(13)
C92B 0.17(2) 0.106(13) 0.19(2) -0.017(11) 0.047(17) -0.031(13)
O17 0.053(7) 0.099(10) 0.060(8) 0.003(7) -0.005(6) -0.003(7)
O18 0.092(10) 0.086(10) 0.091(10) 0.021(8) 0.004(8) -0.013(8)
O19 0.085(10) 0.074(9) 0.094(10) -0.008(7) -0.001(8) 0.012(8)
O20 0.073(9) 0.088(10) 0.070(9) -0.013(7) 0.002(7) -0.013(7)
C93 0.096(17) 0.100(17) 0.086(16) 0.010(13) -0.022(14) -0.005(14)
C94 0.062(13) 0.17(3) 0.047(12) -0.007(14) 0.000(10) 0.008(15)
C95 0.099(18) 0.14(2) 0.092(17) -0.042(17) -0.002(15) -0.004(19)
C96 0.092(17) 0.12(2) 0.064(15) 0.000(13) -0.007(12) -0.014(16)
C97 0.102(19) 0.12(2) 0.083(17) 0.009(15) -0.004(15) -0.031(17)
C98 0.100(17) 0.091(16) 0.074(15) 0.001(12) -0.001(13) -0.011(14)
C99 0.085(16) 0.101(17) 0.080(15) 0.005(12) 0.019(13) 0.007(13)
C100 0.096(18) 0.108(19) 0.094(17) -0.004(14) 0.000(14) 0.022(15)
C101 0.16(3) 0.064(14) 0.14(2) -0.011(14) -0.05(2) 0.006(15)
C102 0.19(3) 0.23(4) 0.10(2) 0.03(2) -0.02(2) -0.14(3)
F1 0.178(14) 0.125(7) 0.158(9) -0.034(6) -0.047(9) 0.028(9)
F2 0.178(14) 0.125(7) 0.158(9) -0.034(6) -0.047(9) 0.028(9)
F3 0.178(14) 0.125(7) 0.158(9) -0.034(6) -0.047(9) 0.028(9)
F4 0.178(14) 0.125(7) 0.158(9) -0.034(6) -0.047(9) 0.028(9)
B1 0.06(2) 0.049(13) 0.050(15) -0.015(10) -0.035(16) 0.019(14)
F1B 0.178(14) 0.125(7) 0.158(9) -0.034(6) -0.047(9) 0.028(9)
F2B 0.178(14) 0.125(7) 0.158(9) -0.034(6) -0.047(9) 0.028(9)
F3B 0.178(14) 0.125(7) 0.158(9) -0.034(6) -0.047(9) 0.028(9)
F4B 0.178(14) 0.125(7) 0.158(9) -0.034(6) -0.047(9) 0.028(9)
B1B 0.06(2) 0.049(13) 0.050(15) -0.015(10) -0.035(16) 0.019(14)
O21 0.153(17) 0.154(18) 0.176(15) 0.035(16) 0.003(15) 0.002(16)
C103 0.153(17) 0.154(18) 0.176(15) 0.035(16) 0.003(15) 0.002(16)
C104 0.153(17) 0.154(18) 0.176(15) 0.035(16) 0.003(15) 0.002(16)
C105 0.153(17) 0.154(18) 0.176(15) 0.035(16) 0.003(15) 0.002(16)
C106 0.153(17) 0.154(18) 0.176(15) 0.035(16) 0.003(15) 0.002(16)
O22 0.153(17) 0.154(18) 0.176(15) 0.035(16) 0.003(15) 0.002(16)
C113 0.153(17) 0.154(18) 0.176(15) 0.035(16) 0.003(15) 0.002(16)
C114 0.153(17) 0.154(18) 0.176(15) 0.035(16) 0.003(15) 0.002(16)
C115 0.153(17) 0.154(18) 0.176(15) 0.035(16) 0.003(15) 0.002(16)
C116 0.153(17) 0.154(18) 0.176(15) 0.035(16) 0.003(15) 0.002(16)
 
_geom_special_details
;
 All esds (except the esd in the dihedral angle between two l.s. planes)
 are estimated using the full covariance matrix.  The cell esds are taken
 into account individually in the estimation of esds in distances, angles
 and torsion angles; correlations between esds in cell parameters are only
 used when they are defined by crystal symmetry.  An approximate (isotropic)
 treatment of cell esds is used for estimating esds involving l.s. planes.
;
 
loop_
 _geom_bond_atom_site_label_1
 _geom_bond_atom_site_label_2
 _geom_bond_distance
 _geom_bond_site_symmetry_2
 _geom_bond_publ_flag
Ag1 N1 2.130(13) . ?
Ag1 N3 2.141(11) . ?
Ag1 Ag2 3.2594(18) . ?
Ag2 N4 2.129(14) . ?
Ag2 N2 2.147(13) . ?
Fe1 C16 1.99(2) . ?
Fe1 C30 2.025(18) . ?
Fe1 C32 2.034(18) . ?
Fe1 C31 2.044(19) . ?
Fe1 C14 2.05(2) . ?
Fe1 C15 2.05(2) . ?
Fe1 C13 2.063(18) . ?
Fe1 C12 2.066(15) . ?
Fe1 C29 2.07(2) . ?
Fe1 C28 2.094(16) . ?
Fe2 C76 2.01(2) . ?
Fe2 C78 2.015(19) . ?
Fe2 C77 2.02(2) . ?
Fe2 C59 2.03(2) . ?
Fe2 C62 2.030(17) . ?
Fe2 C61 2.041(19) . ?
Fe2 C58 2.048(18) . ?
Fe2 C60 2.05(2) . ?
Fe2 C74 2.056(17) . ?
Fe2 C75 2.063(18) . ?
S1 O17 1.396(13) . ?
S1 O18 1.433(14) . ?
S1 O19 1.437(14) . ?
S1 O20 1.611(15) . ?
O1 C2 1.34(2) . ?
O1 C33 1.42(2) . ?
O2 C35 1.37(3) . ?
O2 C34 1.49(3) . ?
O3 C37 1.39(3) . ?
O3 C36 1.41(3) . ?
O4 C38 1.43(3) . ?
O4 C39 1.50(3) . ?
O13 C64 1.34(2) . ?
O13 C86 1.39(2) . ?
O14 C88 1.41(3) . ?
O14 C87 1.45(3) . ?
O15 C89 1.38(2) . ?
O15 C90 1.426(3) . ?
O15 C90B 1.426(3) . ?
N1 C5 1.35(2) . ?
N1 C1 1.35(2) . ?
N2 C17 1.29(2) . ?
N2 C21 1.38(2) . ?
N3 C51 1.33(2) . ?
N3 C47 1.36(2) . ?
N4 C63 1.33(2) . ?
N4 C67 1.35(2) . ?
C1 C2 1.38(2) . ?
C1 H1 0.9500 . ?
C2 C3 1.43(3) . ?
C3 C4 1.40(3) . ?
C3 C6 1.45(3) . ?
C4 C5 1.33(2) . ?
C4 H4 0.9500 . ?
C5 H5 0.9500 . ?
C6 C11 1.40(3) . ?
C6 C7 1.47(3) . ?
C7 C8 1.37(2) . ?
C7 H7 0.9500 . ?
C8 C9 1.38(3) . ?
C8 H8 0.9500 . ?
C9 C10 1.39(3) . ?
C9 C12 1.46(2) . ?
C10 C11 1.39(2) . ?
C10 H10 0.9500 . ?
C11 H11 0.9500 . ?
C12 C13 1.44(3) . ?
C12 C16 1.46(3) . ?
C13 C14 1.47(3) . ?
C13 H13 0.9500 . ?
C14 C15 1.44(4) . ?
C14 H14 0.9500 . ?
C15 C16 1.41(3) . ?
C15 H15 0.9500 . ?
C16 H16 0.9500 . ?
C17 C18 1.36(2) . ?
C17 H17 0.9500 . ?
C18 C19 1.44(3) . ?
C18 H18 0.9500 . ?
C19 C22 1.44(3) . ?
C19 C20 1.46(2) . ?
C20 O5 1.326(16) . ?
C20 C21 1.36(3) . ?
C21 H21 0.9500 . ?
C22 C27 1.38(2) . ?
C22 C23 1.40(3) . ?
C23 C24 1.37(2) . ?
C23 H23 0.9500 . ?
C24 C25 1.46(2) . ?
C24 H24 0.9500 . ?
C25 C28 1.41(2) . ?
C25 C26 1.41(2) . ?
C26 C27 1.36(2) . ?
C26 H26 0.9500 . ?
C27 H27 0.9500 . ?
C28 C32 1.40(2) . ?
C28 C29 1.47(3) . ?
C29 C30 1.46(2) . ?
C29 H29 0.9500 . ?
C30 C31 1.39(3) . ?
C30 H30 0.9500 . ?
C31 C32 1.46(3) . ?
C31 H31 0.9500 . ?
C32 H32 0.9500 . ?
C33 C34 1.48(3) . ?
C33 H33A 0.9900 . ?
C33 H33B 0.9900 . ?
C34 H34A 0.9900 . ?
C34 H34B 0.9900 . ?
C35 C36 1.49(3) . ?
C35 H35A 0.9900 . ?
C35 H35B 0.9900 . ?
C36 H36A 0.9900 . ?
C36 H36B 0.9900 . ?
C37 C38 1.43(3) . ?
C37 H37A 0.9900 . ?
C37 H37B 0.9900 . ?
C38 H38A 0.9900 . ?
C38 H38B 0.9900 . ?
C39 H39A 0.9800 . ?
C39 H39B 0.9800 . ?
C39 H39C 0.9800 . ?
O5 C40 1.426(3) . ?
O5 C40B 1.426(3) . ?
C40 C41 1.530(3) . ?
C40 H40A 0.9900 . ?
C40 H40B 0.9900 . ?
C41 O6 1.426(3) . ?
C41 H41A 0.9900 . ?
C41 H41B 0.9900 . ?
O6 C42 1.426(3) . ?
C42 C43 1.530(3) . ?
C42 H42A 0.9900 . ?
C42 H42B 0.9900 . ?
C43 O7 1.425(3) . ?
C43 H43A 0.9900 . ?
C43 H43B 0.9900 . ?
O7 C44 1.426(3) . ?
C44 C45 1.530(3) . ?
C44 H44A 0.9900 . ?
C44 H44B 0.9900 . ?
C45 O8 1.426(3) . ?
C45 H45A 0.9900 . ?
C45 H45B 0.9900 . ?
O8 C46 1.426(3) . ?
C46 H46A 0.9800 . ?
C46 H46B 0.9800 . ?
C46 H46C 0.9800 . ?
C40B C41B 1.530(3) . ?
C40B H40C 0.9900 . ?
C40B H40D 0.9900 . ?
C41B O6B 1.426(3) . ?
C41B H41C 0.9900 . ?
C41B H41D 0.9900 . ?
O6B C42B 1.426(3) . ?
C42B C43B 1.530(3) . ?
C42B H42C 0.9900 . ?
C42B H42D 0.9900 . ?
C43B O7B 1.426(3) . ?
C43B H43C 0.9900 . ?
C43B H43D 0.9900 . ?
O7B C44B 1.426(3) . ?
C44B C45B 1.530(3) . ?
C44B H44C 0.9900 . ?
C44B H44D 0.9900 . ?
C45B O8B 1.426(3) . ?
C45B H45C 0.9900 . ?
C45B H45D 0.9900 . ?
O8B C46B 1.426(3) . ?
C46B H46D 0.9800 . ?
C46B H46E 0.9800 . ?
C46B H46F 0.9800 . ?
C47 C48 1.40(2) . ?
C47 H47 0.9500 . ?
C48 O9 1.33(2) . ?
C48 C49 1.41(2) . ?
C49 C50 1.38(3) . ?
C49 C52 1.48(2) . ?
C50 C51 1.37(2) . ?
C50 H50 0.9500 . ?
C51 H51 0.9500 . ?
C52 C57 1.37(2) . ?
C52 C53 1.43(2) . ?
C53 C54 1.32(2) . ?
C53 H53 0.9500 . ?
C54 C55 1.38(2) . ?
C54 H54 0.9500 . ?
C55 C56 1.45(2) . ?
C55 C58 1.47(2) . ?
C56 C57 1.38(2) . ?
C56 H56 0.9500 . ?
C57 H57 0.9500 . ?
C58 C59 1.38(3) . ?
C58 C62 1.39(3) . ?
C59 C60 1.45(3) . ?
C59 H59 0.9500 . ?
C60 C61 1.45(3) . ?
C60 H60 0.9500 . ?
C61 C62 1.42(2) . ?
C61 H61 0.9500 . ?
C62 H62 0.9500 . ?
C63 C64 1.40(2) . ?
C63 H63 0.9500 . ?
C64 C65 1.45(3) . ?
C65 C66 1.41(2) . ?
C65 C68 1.43(2) . ?
C66 C67 1.35(2) . ?
C66 H66 0.9500 . ?
C67 H67 0.9500 . ?
C68 C73 1.38(2) . ?
C68 C69 1.44(2) . ?
C69 C70 1.35(2) . ?
C69 H69 0.9500 . ?
C70 C71 1.39(2) . ?
C70 H70 0.9500 . ?
C71 C72 1.41(2) . ?
C71 C74 1.46(2) . ?
C72 C73 1.39(2) . ?
C72 H72 0.9500 . ?
C73 H73 0.9500 . ?
C74 C75 1.42(2) . ?
C74 C78 1.44(3) . ?
C75 C76 1.40(3) . ?
C75 H75 0.9500 . ?
C76 C77 1.42(3) . ?
C76 H76 0.9500 . ?
C77 C78 1.36(2) . ?
C77 H77 0.9500 . ?
C78 H78 0.9500 . ?
O9 C79 1.426(3) . ?
C79 C80 1.530(3) . ?
C79 H79A 0.9900 . ?
C79 H79B 0.9900 . ?
C80 O10 1.425(3) . ?
C80 H80A 0.9900 . ?
C80 H80B 0.9900 . ?
O10 C81 1.426(3) . ?
O10 C81B 1.426(3) . ?
C81 C82 1.530(3) . ?
C81 H81A 0.9900 . ?
C81 H81B 0.9900 . ?
C82 O11 1.426(3) . ?
C82 H82A 0.9900 . ?
C82 H82B 0.9900 . ?
O11 C83 1.426(3) . ?
C83 C84 1.530(3) . ?
C83 H83A 0.9900 . ?
C83 H83B 0.9900 . ?
C84 O12 1.426(3) . ?
C84 H84A 0.9900 . ?
C84 H84B 0.9900 . ?
O12 C85 1.426(3) . ?
C85 H85A 0.9800 . ?
C85 H85B 0.9800 . ?
C85 H85C 0.9800 . ?
C81B C82B 1.530(3) . ?
C81B H81C 0.9900 . ?
C81B H81D 0.9900 . ?
C82B O11B 1.426(3) . ?
C82B H82C 0.9900 . ?
C82B H82D 0.9900 . ?
O11B C83B 1.426(3) . ?
C83B C84B 1.530(3) . ?
C83B H83C 0.9900 . ?
C83B H83D 0.9900 . ?
C84B O12B 1.426(3) . ?
C84B H84C 0.9900 . ?
C84B H84D 0.9900 . ?
O12B C85B 1.426(3) . ?
C85B H85D 0.9800 . ?
C85B H85E 0.9800 . ?
C85B H85F 0.9800 . ?
C86 C87 1.54(3) . ?
C86 H86A 0.9900 . ?
C86 H86B 0.9900 . ?
C87 H87A 0.9900 . ?
C87 H87B 0.9900 . ?
C88 C89 1.52(4) . ?
C88 H88A 0.9900 . ?
C88 H88B 0.9900 . ?
C89 H89A 0.9900 . ?
C89 H89B 0.9900 . ?
C90 C91 1.530(3) . ?
C90 H90A 0.9900 . ?
C90 H90B 0.9900 . ?
C91 O16 1.426(3) . ?
C91 H91A 0.9900 . ?
C91 H91B 0.9900 . ?
O16 C92 1.426(3) . ?
C92 H92A 0.9800 . ?
C92 H92B 0.9800 . ?
C92 H92C 0.9800 . ?
C90B C91B 1.530(3) . ?
C90B H90C 0.9900 . ?
C90B H90D 0.9900 . ?
C91B O16B 1.426(3) . ?
C91B H91C 0.9900 . ?
C91B H91D 0.9900 . ?
O16B C92B 1.426(3) . ?
C92B H92D 0.9800 . ?
C92B H92E 0.9800 . ?
C92B H92F 0.9800 . ?
O20 C93 1.50(3) . ?
C93 C94 1.45(3) . ?
C93 C98 1.48(3) . ?
C93 H93 1.0000 . ?
C94 C95 1.51(3) . ?
C94 C99 1.57(3) . ?
C94 H94 1.0000 . ?
C95 C96 1.49(3) . ?
C95 H95A 0.9900 . ?
C95 H95B 0.9900 . ?
C96 C97 1.50(3) . ?
C96 H96A 0.9900 . ?
C96 H96B 0.9900 . ?
C97 C98 1.51(3) . ?
C97 C102 1.55(4) . ?
C97 H97 1.0000 . ?
C98 H98A 0.9900 . ?
C98 H98B 0.9900 . ?
C99 C101 1.55(4) . ?
C99 C100 1.61(3) . ?
C99 H99 1.0000 . ?
C100 H10A 0.9800 . ?
C100 H10B 0.9800 . ?
C100 H10C 0.9800 . ?
C101 H10D 0.9800 . ?
C101 H10E 0.9800 . ?
C101 H10F 0.9800 . ?
C102 H10G 0.9800 . ?
C102 H10H 0.9800 . ?
C102 H10I 0.9800 . ?
F1 B1 1.350(10) . ?
F2 B1 1.349(10) . ?
F3 B1 1.350(10) . ?
F4 B1 1.349(10) . ?
F1B B1B 1.350(10) . ?
F2B B1B 1.350(10) . ?
F3B B1B 1.350(10) . ?
F4B B1B 1.349(10) . ?
O21 C103 1.480(3) . ?
O21 C106 1.480(3) . ?
C103 C104 1.500(3) . ?
C103 H10J 0.9900 . ?
C103 H10K 0.9900 . ?
C104 C105 1.499(3) . ?
C104 H10L 0.9900 . ?
C104 H10M 0.9900 . ?
C105 C106 1.499(3) . ?
C105 H10N 0.9900 . ?
C105 H10O 0.9900 . ?
C106 H10P 0.9900 . ?
C106 H10Q 0.9900 . ?
O22 C116 1.480(3) . ?
O22 C113 1.480(3) . ?
C113 C114 1.500(3) . ?
C113 H11A 0.9900 . ?
C113 H11B 0.9900 . ?
C114 C115 1.500(3) . ?
C114 H11C 0.9900 . ?
C114 H11D 0.9900 . ?
C115 C116 1.500(3) . ?
C115 H11E 0.9900 . ?
C115 H11F 0.9900 . ?
C116 H11G 0.9900 . ?
C116 H11H 0.9900 . ?
 
loop_
 _geom_angle_atom_site_label_1
 _geom_angle_atom_site_label_2
 _geom_angle_atom_site_label_3
 _geom_angle
 _geom_angle_site_symmetry_1
 _geom_angle_site_symmetry_3
 _geom_angle_publ_flag
N1 Ag1 N3 175.6(7) . . ?
N1 Ag1 Ag2 87.8(3) . . ?
N3 Ag1 Ag2 92.8(3) . . ?
N4 Ag2 N2 168.8(5) . . ?
N4 Ag2 Ag1 93.0(4) . . ?
N2 Ag2 Ag1 95.7(3) . . ?
C16 Fe1 C30 158.0(9) . . ?
C16 Fe1 C32 105.9(9) . . ?
C30 Fe1 C32 68.6(9) . . ?
C16 Fe1 C31 121.8(10) . . ?
C30 Fe1 C31 40.0(8) . . ?
C32 Fe1 C31 42.0(7) . . ?
C16 Fe1 C14 68.9(11) . . ?
C30 Fe1 C14 107.0(9) . . ?
C32 Fe1 C14 156.1(11) . . ?
C31 Fe1 C14 119.4(8) . . ?
C16 Fe1 C15 40.8(8) . . ?
C30 Fe1 C15 122.0(8) . . ?
C32 Fe1 C15 119.9(12) . . ?
C31 Fe1 C15 104.5(10) . . ?
C14 Fe1 C15 41.0(11) . . ?
C16 Fe1 C13 69.7(10) . . ?
C30 Fe1 C13 122.6(10) . . ?
C32 Fe1 C13 160.1(7) . . ?
C31 Fe1 C13 156.8(8) . . ?
C14 Fe1 C13 42.0(9) . . ?
C15 Fe1 C13 70.3(11) . . ?
C16 Fe1 C12 42.1(8) . . ?
C30 Fe1 C12 158.6(10) . . ?
C32 Fe1 C12 123.3(8) . . ?
C31 Fe1 C12 160.4(10) . . ?
C14 Fe1 C12 69.4(7) . . ?
C15 Fe1 C12 70.0(8) . . ?
C13 Fe1 C12 40.7(8) . . ?
C16 Fe1 C29 157.9(8) . . ?
C30 Fe1 C29 41.8(7) . . ?
C32 Fe1 C29 68.5(8) . . ?
C31 Fe1 C29 69.4(8) . . ?
C14 Fe1 C29 124.9(12) . . ?
C15 Fe1 C29 160.7(9) . . ?
C13 Fe1 C29 107.8(9) . . ?
C12 Fe1 C29 121.8(7) . . ?
C16 Fe1 C28 120.8(8) . . ?
C30 Fe1 C28 69.3(6) . . ?
C32 Fe1 C28 39.6(7) . . ?
C31 Fe1 C28 69.1(7) . . ?
C14 Fe1 C28 163.0(12) . . ?
C15 Fe1 C28 155.2(11) . . ?
C13 Fe1 C28 124.9(8) . . ?
C12 Fe1 C28 107.6(6) . . ?
C29 Fe1 C28 41.4(7) . . ?
C76 Fe2 C78 66.2(8) . . ?
C76 Fe2 C77 41.4(8) . . ?
C78 Fe2 C77 39.3(7) . . ?
C76 Fe2 C59 126.4(9) . . ?
C78 Fe2 C59 157.4(8) . . ?
C77 Fe2 C59 162.5(8) . . ?
C76 Fe2 C62 156.2(8) . . ?
C78 Fe2 C62 109.6(8) . . ?
C77 Fe2 C62 120.1(10) . . ?
C59 Fe2 C62 66.7(9) . . ?
C76 Fe2 C61 120.4(7) . . ?
C78 Fe2 C61 124.3(10) . . ?
C77 Fe2 C61 105.3(9) . . ?
C59 Fe2 C61 68.7(10) . . ?
C62 Fe2 C61 40.8(7) . . ?
C76 Fe2 C58 162.5(8) . . ?
C78 Fe2 C58 123.1(7) . . ?
C77 Fe2 C58 155.2(9) . . ?
C59 Fe2 C58 39.6(8) . . ?
C62 Fe2 C58 39.8(8) . . ?
C61 Fe2 C58 68.6(7) . . ?
C76 Fe2 C60 106.8(8) . . ?
C78 Fe2 C60 160.3(9) . . ?
C77 Fe2 C60 123.2(8) . . ?
C59 Fe2 C60 41.5(8) . . ?
C62 Fe2 C60 68.9(9) . . ?
C61 Fe2 C60 41.6(10) . . ?
C58 Fe2 C60 69.1(7) . . ?
C76 Fe2 C74 68.1(7) . . ?
C78 Fe2 C74 41.3(7) . . ?
C77 Fe2 C74 69.8(7) . . ?
C59 Fe2 C74 121.0(8) . . ?
C62 Fe2 C74 125.5(7) . . ?
C61 Fe2 C74 161.9(10) . . ?
C58 Fe2 C74 108.2(7) . . ?
C60 Fe2 C74 155.6(10) . . ?
C76 Fe2 C75 40.1(7) . . ?
C78 Fe2 C75 67.0(8) . . ?
C77 Fe2 C75 69.2(9) . . ?
C59 Fe2 C75 109.2(9) . . ?
C62 Fe2 C75 162.3(7) . . ?
C61 Fe2 C75 155.8(8) . . ?
C58 Fe2 C75 126.1(8) . . ?
C60 Fe2 C75 120.5(9) . . ?
C74 Fe2 C75 40.3(7) . . ?
O17 S1 O18 115.2(9) . . ?
O17 S1 O19 115.1(9) . . ?
O18 S1 O19 113.6(9) . . ?
O17 S1 O20 99.7(8) . . ?
O18 S1 O20 105.3(9) . . ?
O19 S1 O20 106.1(8) . . ?
C2 O1 C33 118.3(14) . . ?
C35 O2 C34 115.7(17) . . ?
C37 O3 C36 111.4(19) . . ?
C38 O4 C39 116.6(19) . . ?
C64 O13 C86 120.7(14) . . ?
C88 O14 C87 110.2(17) . . ?
C89 O15 C90 111.9(13) . . ?
C89 O15 C90B 111.9(13) . . ?
C5 N1 C1 116.5(14) . . ?
C5 N1 Ag1 122.9(12) . . ?
C1 N1 Ag1 120.6(13) . . ?
C17 N2 C21 117.1(15) . . ?
C17 N2 Ag2 123.9(13) . . ?
C21 N2 Ag2 118.9(12) . . ?
C51 N3 C47 118.7(14) . . ?
C51 N3 Ag1 123.6(12) . . ?
C47 N3 Ag1 117.7(11) . . ?
C63 N4 C67 117.9(15) . . ?
C63 N4 Ag2 121.6(12) . . ?
C67 N4 Ag2 120.5(12) . . ?
N1 C1 C2 124.2(19) . . ?
N1 C1 H1 117.9 . . ?
C2 C1 H1 117.9 . . ?
O1 C2 C1 122.8(18) . . ?
O1 C2 C3 118.1(15) . . ?
C1 C2 C3 119.1(18) . . ?
C4 C3 C2 113.3(16) . . ?
C4 C3 C6 124(2) . . ?
C2 C3 C6 122.5(18) . . ?
C5 C4 C3 124.6(19) . . ?
C5 C4 H4 117.7 . . ?
C3 C4 H4 117.7 . . ?
C4 C5 N1 122.1(18) . . ?
C4 C5 H5 118.9 . . ?
N1 C5 H5 118.9 . . ?
C11 C6 C3 119.0(17) . . ?
C11 C6 C7 117.2(17) . . ?
C3 C6 C7 123.8(18) . . ?
C8 C7 C6 117.6(19) . . ?
C8 C7 H7 121.2 . . ?
C6 C7 H7 121.2 . . ?
C7 C8 C9 123.7(18) . . ?
C7 C8 H8 118.2 . . ?
C9 C8 H8 118.2 . . ?
C8 C9 C10 119.7(17) . . ?
C8 C9 C12 116.8(19) . . ?
C10 C9 C12 123(2) . . ?
C9 C10 C11 119(2) . . ?
C9 C10 H10 120.7 . . ?
C11 C10 H10 120.7 . . ?
C10 C11 C6 123(2) . . ?
C10 C11 H11 118.4 . . ?
C6 C11 H11 118.4 . . ?
C13 C12 C9 129(2) . . ?
C13 C12 C16 106.5(16) . . ?
C9 C12 C16 124(2) . . ?
C13 C12 Fe1 69.5(9) . . ?
C9 C12 Fe1 127.9(11) . . ?
C16 C12 Fe1 66.3(10) . . ?
C12 C13 C14 107(2) . . ?
C12 C13 Fe1 69.8(10) . . ?
C14 C13 Fe1 68.3(12) . . ?
C12 C13 H13 126.4 . . ?
C14 C13 H13 126.4 . . ?
Fe1 C13 H13 127.0 . . ?
C15 C14 C13 109(2) . . ?
C15 C14 Fe1 69.6(14) . . ?
C13 C14 Fe1 69.6(10) . . ?
C15 C14 H14 125.6 . . ?
C13 C14 H14 125.6 . . ?
Fe1 C14 H14 126.8 . . ?
C16 C15 C14 107(2) . . ?
C16 C15 Fe1 67.5(12) . . ?
C14 C15 Fe1 69.3(15) . . ?
C16 C15 H15 126.6 . . ?
C14 C15 H15 126.6 . . ?
Fe1 C15 H15 128.1 . . ?
C15 C16 C12 111(2) . . ?
C15 C16 Fe1 71.7(14) . . ?
C12 C16 Fe1 71.6(11) . . ?
C15 C16 H16 124.7 . . ?
C12 C16 H16 124.7 . . ?
Fe1 C16 H16 123.6 . . ?
N2 C17 C18 124.6(18) . . ?
N2 C17 H17 117.7 . . ?
C18 C17 H17 117.7 . . ?
C17 C18 C19 121.8(19) . . ?
C17 C18 H18 119.1 . . ?
C19 C18 H18 119.1 . . ?
C22 C19 C18 122.1(18) . . ?
C22 C19 C20 125.2(19) . . ?
C18 C19 C20 112.7(17) . . ?
O5 C20 C21 125.7(12) . . ?
O5 C20 C19 114.6(17) . . ?
C21 C20 C19 119.6(15) . . ?
C20 C21 N2 124.1(16) . . ?
C20 C21 H21 117.9 . . ?
N2 C21 H21 117.9 . . ?
C27 C22 C23 118.1(16) . . ?
C27 C22 C19 123.2(18) . . ?
C23 C22 C19 118.7(18) . . ?
C24 C23 C22 122.5(18) . . ?
C24 C23 H23 118.8 . . ?
C22 C23 H23 118.8 . . ?
C23 C24 C25 119.3(17) . . ?
C23 C24 H24 120.3 . . ?
C25 C24 H24 120.3 . . ?
C28 C25 C26 123.8(17) . . ?
C28 C25 C24 120.8(16) . . ?
C26 C25 C24 115.4(15) . . ?
C27 C26 C25 123.6(17) . . ?
C27 C26 H26 118.2 . . ?
C25 C26 H26 118.2 . . ?
C26 C27 C22 121.1(17) . . ?
C26 C27 H27 119.5 . . ?
C22 C27 H27 119.5 . . ?
C32 C28 C25 127.1(18) . . ?
C32 C28 C29 107.1(16) . . ?
C25 C28 C29 125.8(17) . . ?
C32 C28 Fe1 67.9(10) . . ?
C25 C28 Fe1 129.0(11) . . ?
C29 C28 Fe1 68.4(10) . . ?
C30 C29 C28 106.0(18) . . ?
C30 C29 Fe1 67.5(11) . . ?
C28 C29 Fe1 70.2(10) . . ?
C30 C29 H29 127.0 . . ?
C28 C29 H29 127.0 . . ?
Fe1 C29 H29 126.8 . . ?
C31 C30 C29 110.1(16) . . ?
C31 C30 Fe1 70.7(11) . . ?
C29 C30 Fe1 70.7(9) . . ?
C31 C30 H30 125.0 . . ?
C29 C30 H30 125.0 . . ?
Fe1 C30 H30 125.2 . . ?
C30 C31 C32 106.5(18) . . ?
C30 C31 Fe1 69.3(12) . . ?
C32 C31 Fe1 68.6(10) . . ?
C30 C31 H31 126.8 . . ?
C32 C31 H31 126.8 . . ?
Fe1 C31 H31 126.9 . . ?
C28 C32 C31 110(2) . . ?
C28 C32 Fe1 72.5(10) . . ?
C31 C32 Fe1 69.4(11) . . ?
C28 C32 H32 124.9 . . ?
C31 C32 H32 124.9 . . ?
Fe1 C32 H32 124.8 . . ?
O1 C33 C34 106.9(17) . . ?
O1 C33 H33A 110.3 . . ?
C34 C33 H33A 110.3 . . ?
O1 C33 H33B 110.3 . . ?
C34 C33 H33B 110.3 . . ?
H33A C33 H33B 108.6 . . ?
C33 C34 O2 107.1(18) . . ?
C33 C34 H34A 110.3 . . ?
O2 C34 H34A 110.3 . . ?
C33 C34 H34B 110.3 . . ?
O2 C34 H34B 110.3 . . ?
H34A C34 H34B 108.6 . . ?
O2 C35 C36 110(2) . . ?
O2 C35 H35A 109.7 . . ?
C36 C35 H35A 109.7 . . ?
O2 C35 H35B 109.7 . . ?
C36 C35 H35B 109.7 . . ?
H35A C35 H35B 108.2 . . ?
O3 C36 C35 110(2) . . ?
O3 C36 H36A 109.6 . . ?
C35 C36 H36A 109.6 . . ?
O3 C36 H36B 109.6 . . ?
C35 C36 H36B 109.6 . . ?
H36A C36 H36B 108.1 . . ?
O3 C37 C38 110(2) . . ?
O3 C37 H37A 109.6 . . ?
C38 C37 H37A 109.6 . . ?
O3 C37 H37B 109.6 . . ?
C38 C37 H37B 109.6 . . ?
H37A C37 H37B 108.1 . . ?
O4 C38 C37 109(2) . . ?
O4 C38 H38A 109.8 . . ?
C37 C38 H38A 109.8 . . ?
O4 C38 H38B 109.8 . . ?
C37 C38 H38B 109.8 . . ?
H38A C38 H38B 108.3 . . ?
O4 C39 H39A 109.5 . . ?
O4 C39 H39B 109.5 . . ?
H39A C39 H39B 109.5 . . ?
O4 C39 H39C 109.5 . . ?
H39A C39 H39C 109.5 . . ?
H39B C39 H39C 109.5 . . ?
C20 O5 C40 115.6(10) . . ?
C20 O5 C40B 115.6(11) . . ?
O5 C40 C41 109.6(3) . . ?
O5 C40 H40A 109.8 . . ?
C41 C40 H40A 109.8 . . ?
O5 C40 H40B 109.8 . . ?
C41 C40 H40B 109.8 . . ?
H40A C40 H40B 108.2 . . ?
O6 C41 C40 109.5(3) . . ?
O6 C41 H41A 109.8 . . ?
C40 C41 H41A 109.8 . . ?
O6 C41 H41B 109.8 . . ?
C40 C41 H41B 109.8 . . ?
H41A C41 H41B 108.2 . . ?
C41 O6 C42 109.6(3) . . ?
O6 C42 C43 109.6(3) . . ?
O6 C42 H42A 109.7 . . ?
C43 C42 H42A 109.7 . . ?
O6 C42 H42B 109.7 . . ?
C43 C42 H42B 109.7 . . ?
H42A C42 H42B 108.2 . . ?
O7 C43 C42 109.6(3) . . ?
O7 C43 H43A 109.7 . . ?
C42 C43 H43A 109.7 . . ?
O7 C43 H43B 109.7 . . ?
C42 C43 H43B 109.7 . . ?
H43A C43 H43B 108.2 . . ?
C43 O7 C44 109.5(3) . . ?
O7 C44 C45 109.5(3) . . ?
O7 C44 H44A 109.8 . . ?
C45 C44 H44A 109.8 . . ?
O7 C44 H44B 109.8 . . ?
C45 C44 H44B 109.8 . . ?
H44A C44 H44B 108.2 . . ?
O8 C45 C44 109.5(3) . . ?
O8 C45 H45A 109.8 . . ?
C44 C45 H45A 109.8 . . ?
O8 C45 H45B 109.8 . . ?
C44 C45 H45B 109.8 . . ?
H45A C45 H45B 108.2 . . ?
C46 O8 C45 109.5(3) . . ?
O8 C46 H46A 109.5 . . ?
O8 C46 H46B 109.5 . . ?
H46A C46 H46B 109.5 . . ?
O8 C46 H46C 109.5 . . ?
H46A C46 H46C 109.5 . . ?
H46B C46 H46C 109.5 . . ?
O5 C40B C41B 109.6(3) . . ?
O5 C40B H40C 109.8 . . ?
C41B C40B H40C 109.8 . . ?
O5 C40B H40D 109.8 . . ?
C41B C40B H40D 109.8 . . ?
H40C C40B H40D 108.2 . . ?
O6B C41B C40B 109.5(3) . . ?
O6B C41B H41C 109.8 . . ?
C40B C41B H41C 109.8 . . ?
O6B C41B H41D 109.8 . . ?
C40B C41B H41D 109.8 . . ?
H41C C41B H41D 108.2 . . ?
C41B O6B C42B 109.5(3) . . ?
O6B C42B C43B 109.5(3) . . ?
O6B C42B H42C 109.8 . . ?
C43B C42B H42C 109.8 . . ?
O6B C42B H42D 109.8 . . ?
C43B C42B H42D 109.8 . . ?
H42C C42B H42D 108.2 . . ?
O7B C43B C42B 109.5(3) . . ?
O7B C43B H43C 109.8 . . ?
C42B C43B H43C 109.8 . . ?
O7B C43B H43D 109.8 . . ?
C42B C43B H43D 109.8 . . ?
H43C C43B H43D 108.2 . . ?
C43B O7B C44B 109.5(3) . . ?
O7B C44B C45B 109.5(3) . . ?
O7B C44B H44C 109.8 . . ?
C45B C44B H44C 109.8 . . ?
O7B C44B H44D 109.8 . . ?
C45B C44B H44D 109.8 . . ?
H44C C44B H44D 108.2 . . ?
O8B C45B C44B 109.5(3) . . ?
O8B C45B H45C 109.8 . . ?
C44B C45B H45C 109.8 . . ?
O8B C45B H45D 109.8 . . ?
C44B C45B H45D 109.8 . . ?
H45C C45B H45D 108.2 . . ?
C45B O8B C46B 109.5(3) . . ?
O8B C46B H46D 109.5 . . ?
O8B C46B H46E 109.5 . . ?
H46D C46B H46E 109.5 . . ?
O8B C46B H46F 109.5 . . ?
H46D C46B H46F 109.5 . . ?
H46E C46B H46F 109.5 . . ?
N3 C47 C48 122.3(16) . . ?
N3 C47 H47 118.9 . . ?
C48 C47 H47 118.9 . . ?
O9 C48 C47 122.3(16) . . ?
O9 C48 C49 118.7(16) . . ?
C47 C48 C49 119.0(17) . . ?
C50 C49 C48 115.6(14) . . ?
C50 C49 C52 122.0(15) . . ?
C48 C49 C52 122.4(16) . . ?
C51 C50 C49 123.4(18) . . ?
C51 C50 H50 118.3 . . ?
C49 C50 H50 118.3 . . ?
N3 C51 C50 120.9(18) . . ?
N3 C51 H51 119.5 . . ?
C50 C51 H51 119.5 . . ?
C57 C52 C53 118.0(15) . . ?
C57 C52 C49 123.5(16) . . ?
C53 C52 C49 118.4(15) . . ?
C54 C53 C52 120.0(16) . . ?
C54 C53 H53 120.0 . . ?
C52 C53 H53 120.0 . . ?
C53 C54 C55 124.4(16) . . ?
C53 C54 H54 117.8 . . ?
C55 C54 H54 117.8 . . ?
C54 C55 C56 115.9(15) . . ?
C54 C55 C58 124.8(15) . . ?
C56 C55 C58 119.3(17) . . ?
C57 C56 C55 119.7(18) . . ?
C57 C56 H56 120.2 . . ?
C55 C56 H56 120.2 . . ?
C52 C57 C56 121.9(17) . . ?
C52 C57 H57 119.0 . . ?
C56 C57 H57 119.0 . . ?
C59 C58 C62 107.4(16) . . ?
C59 C58 C55 124.5(19) . . ?
C62 C58 C55 128.1(17) . . ?
C59 C58 Fe2 69.4(11) . . ?
C62 C58 Fe2 69.4(10) . . ?
C55 C58 Fe2 127.8(12) . . ?
C58 C59 C60 111(2) . . ?
C58 C59 Fe2 71.0(14) . . ?
C60 C59 Fe2 70.2(13) . . ?
C58 C59 H59 124.6 . . ?
C60 C59 H59 124.6 . . ?
Fe2 C59 H59 125.8 . . ?
C59 C60 C61 104.6(18) . . ?
C59 C60 Fe2 68.3(12) . . ?
C61 C60 Fe2 68.8(12) . . ?
C59 C60 H60 127.7 . . ?
C61 C60 H60 127.7 . . ?
Fe2 C60 H60 126.7 . . ?
C62 C61 C60 106.9(18) . . ?
C62 C61 Fe2 69.2(10) . . ?
C60 C61 Fe2 69.6(11) . . ?
C62 C61 H61 126.6 . . ?
C60 C61 H61 126.6 . . ?
Fe2 C61 H61 126.2 . . ?
C58 C62 C61 110(2) . . ?
C58 C62 Fe2 70.8(11) . . ?
C61 C62 Fe2 70.0(10) . . ?
C58 C62 H62 124.8 . . ?
C61 C62 H62 124.8 . . ?
Fe2 C62 H62 125.9 . . ?
N4 C63 C64 122.1(17) . . ?
N4 C63 H63 118.9 . . ?
C64 C63 H63 118.9 . . ?
O13 C64 C63 122.4(17) . . ?
O13 C64 C65 116.4(14) . . ?
C63 C64 C65 121.2(17) . . ?
C66 C65 C68 124.4(18) . . ?
C66 C65 C64 112.3(16) . . ?
C68 C65 C64 123.2(16) . . ?
C67 C66 C65 123.5(18) . . ?
C67 C66 H66 118.3 . . ?
C65 C66 H66 118.3 . . ?
C66 C67 N4 123.0(17) . . ?
C66 C67 H67 118.5 . . ?
N4 C67 H67 118.5 . . ?
C73 C68 C65 119.3(16) . . ?
C73 C68 C69 117.3(15) . . ?
C65 C68 C69 123.5(16) . . ?
C70 C69 C68 120.0(17) . . ?
C70 C69 H69 120.0 . . ?
C68 C69 H69 120.0 . . ?
C69 C70 C71 122.8(15) . . ?
C69 C70 H70 118.6 . . ?
C71 C70 H70 118.6 . . ?
C70 C71 C72 117.4(15) . . ?
C70 C71 C74 121.7(16) . . ?
C72 C71 C74 120.9(17) . . ?
C73 C72 C71 120.3(16) . . ?
C73 C72 H72 119.9 . . ?
C71 C72 H72 119.9 . . ?
C68 C73 C72 122.0(16) . . ?
C68 C73 H73 119.0 . . ?
C72 C73 H73 119.0 . . ?
C75 C74 C78 104.1(16) . . ?
C75 C74 C71 127.2(17) . . ?
C78 C74 C71 128.6(17) . . ?
C75 C74 Fe2 70.1(10) . . ?
C78 C74 Fe2 67.8(10) . . ?
C71 C74 Fe2 128.5(12) . . ?
C76 C75 C74 107.7(17) . . ?
C76 C75 Fe2 67.8(11) . . ?
C74 C75 Fe2 69.6(10) . . ?
C76 C75 H75 126.1 . . ?
C74 C75 H75 126.1 . . ?
Fe2 C75 H75 128.0 . . ?
C75 C76 C77 110.8(16) . . ?
C75 C76 Fe2 72.1(11) . . ?
C77 C76 Fe2 69.9(12) . . ?
C75 C76 H76 124.6 . . ?
C77 C76 H76 124.6 . . ?
Fe2 C76 H76 124.9 . . ?
C78 C77 C76 104.2(17) . . ?
C78 C77 Fe2 70.0(11) . . ?
C76 C77 Fe2 68.7(12) . . ?
C78 C77 H77 127.9 . . ?
C76 C77 H77 127.9 . . ?
Fe2 C77 H77 125.0 . . ?
C77 C78 C74 113.2(19) . . ?
C77 C78 Fe2 70.7(12) . . ?
C74 C78 Fe2 70.9(10) . . ?
C77 C78 H78 123.4 . . ?
C74 C78 H78 123.4 . . ?
Fe2 C78 H78 126.7 . . ?
C48 O9 C79 119.2(12) . . ?
O9 C79 C80 108.4(11) . . ?
O9 C79 H79A 110.0 . . ?
C80 C79 H79A 110.0 . . ?
O9 C79 H79B 110.0 . . ?
C80 C79 H79B 110.0 . . ?
H79A C79 H79B 108.4 . . ?
O10 C80 C79 104.2(12) . . ?
O10 C80 H80A 110.9 . . ?
C79 C80 H80A 110.9 . . ?
O10 C80 H80B 110.9 . . ?
C79 C80 H80B 110.9 . . ?
H80A C80 H80B 108.9 . . ?
C80 O10 C81 109.6(3) . . ?
C80 O10 C81B 109.6(3) . . ?
O10 C81 C82 109.6(3) . . ?
O10 C81 H81A 109.8 . . ?
C82 C81 H81A 109.8 . . ?
O10 C81 H81B 109.8 . . ?
C82 C81 H81B 109.8 . . ?
H81A C81 H81B 108.2 . . ?
O11 C82 C81 109.5(3) . . ?
O11 C82 H82A 109.8 . . ?
C81 C82 H82A 109.8 . . ?
O11 C82 H82B 109.8 . . ?
C81 C82 H82B 109.8 . . ?
H82A C82 H82B 108.2 . . ?
C82 O11 C83 109.5(3) . . ?
O11 C83 C84 109.5(3) . . ?
O11 C83 H83A 109.8 . . ?
C84 C83 H83A 109.8 . . ?
O11 C83 H83B 109.8 . . ?
C84 C83 H83B 109.8 . . ?
H83A C83 H83B 108.2 . . ?
O12 C84 C83 132(4) . . ?
O12 C84 H84A 104.2 . . ?
C83 C84 H84A 104.2 . . ?
O12 C84 H84B 104.2 . . ?
C83 C84 H84B 104.2 . . ?
H84A C84 H84B 105.5 . . ?
C84 O12 C85 109.5(3) . . ?
O12 C85 H85A 109.5 . . ?
O12 C85 H85B 109.5 . . ?
H85A C85 H85B 109.5 . . ?
O12 C85 H85C 109.5 . . ?
H85A C85 H85C 109.5 . . ?
H85B C85 H85C 109.5 . . ?
O10 C81B C82B 109.5(3) . . ?
O10 C81B H81C 109.8 . . ?
C82B C81B H81C 109.8 . . ?
O10 C81B H81D 109.8 . . ?
C82B C81B H81D 109.8 . . ?
H81C C81B H81D 108.2 . . ?
O11B C82B C81B 109.5(3) . . ?
O11B C82B H82C 109.8 . . ?
C81B C82B H82C 109.8 . . ?
O11B C82B H82D 109.8 . . ?
C81B C82B H82D 109.8 . . ?
H82C C82B H82D 108.2 . . ?
C82B O11B C83B 109.5(3) . . ?
O11B C83B C84B 109.5(3) . . ?
O11B C83B H83C 109.8 . . ?
C84B C83B H83C 109.8 . . ?
O11B C83B H83D 109.8 . . ?
C84B C83B H83D 109.8 . . ?
H83C C83B H83D 108.2 . . ?
O12B C84B C83B 98(4) . . ?
O12B C84B H84C 112.2 . . ?
C83B C84B H84C 112.2 . . ?
O12B C84B H84D 112.2 . . ?
C83B C84B H84D 112.2 . . ?
H84C C84B H84D 109.8 . . ?
C85B O12B C84B 109.5(3) . . ?
O12B C85B H85D 109.5 . . ?
O12B C85B H85E 109.5 . . ?
H85D C85B H85E 109.5 . . ?
O12B C85B H85F 109.5 . . ?
H85D C85B H85F 109.5 . . ?
H85E C85B H85F 109.5 . . ?
O13 C86 C87 110.1(15) . . ?
O13 C86 H86A 109.6 . . ?
C87 C86 H86A 109.6 . . ?
O13 C86 H86B 109.6 . . ?
C87 C86 H86B 109.6 . . ?
H86A C86 H86B 108.1 . . ?
O14 C87 C86 104.3(17) . . ?
O14 C87 H87A 110.9 . . ?
C86 C87 H87A 110.9 . . ?
O14 C87 H87B 110.9 . . ?
C86 C87 H87B 110.9 . . ?
H87A C87 H87B 108.9 . . ?
O14 C88 C89 109(2) . . ?
O14 C88 H88A 109.8 . . ?
C89 C88 H88A 109.8 . . ?
O14 C88 H88B 109.8 . . ?
C89 C88 H88B 109.8 . . ?
H88A C88 H88B 108.3 . . ?
O15 C89 C88 107(2) . . ?
O15 C89 H89A 110.4 . . ?
C88 C89 H89A 110.4 . . ?
O15 C89 H89B 110.4 . . ?
C88 C89 H89B 110.4 . . ?
H89A C89 H89B 108.6 . . ?
O15 C90 C91 109.5(3) . . ?
O15 C90 H90A 109.8 . . ?
C91 C90 H90A 109.8 . . ?
O15 C90 H90B 109.8 . . ?
C91 C90 H90B 109.8 . . ?
H90A C90 H90B 108.2 . . ?
O16 C91 C90 109.5(3) . . ?
O16 C91 H91A 109.8 . . ?
C90 C91 H91A 109.8 . . ?
O16 C91 H91B 109.8 . . ?
C90 C91 H91B 109.8 . . ?
H91A C91 H91B 108.2 . . ?
C92 O16 C91 109.5(3) . . ?
O16 C92 H92A 109.5 . . ?
O16 C92 H92B 109.5 . . ?
H92A C92 H92B 109.5 . . ?
O16 C92 H92C 109.5 . . ?
H92A C92 H92C 109.5 . . ?
H92B C92 H92C 109.5 . . ?
O15 C90B C91B 109.5(3) . . ?
O15 C90B H90C 109.8 . . ?
C91B C90B H90C 109.8 . . ?
O15 C90B H90D 109.8 . . ?
C91B C90B H90D 109.8 . . ?
H90C C90B H90D 108.2 . . ?
O16B C91B C90B 109.5(3) . . ?
O16B C91B H91C 109.8 . . ?
C90B C91B H91C 109.8 . . ?
O16B C91B H91D 109.8 . . ?
C90B C91B H91D 109.8 . . ?
H91C C91B H91D 108.2 . . ?
C91B O16B C92B 109.5(3) . . ?
O16B C92B H92D 109.5 . . ?
O16B C92B H92E 109.5 . . ?
H92D C92B H92E 109.5 . . ?
O16B C92B H92F 109.5 . . ?
H92D C92B H92F 109.5 . . ?
H92E C92B H92F 109.5 . . ?
C93 O20 S1 117.3(14) . . ?
C94 C93 C98 112(2) . . ?
C94 C93 O20 108.5(19) . . ?
C98 C93 O20 108.2(18) . . ?
C94 C93 H93 109.3 . . ?
C98 C93 H93 109.3 . . ?
O20 C93 H93 109.3 . . ?
C93 C94 C95 113(2) . . ?
C93 C94 C99 112.3(19) . . ?
C95 C94 C99 113(2) . . ?
C93 C94 H94 106.2 . . ?
C95 C94 H94 106.2 . . ?
C99 C94 H94 106.2 . . ?
C96 C95 C94 110(2) . . ?
C96 C95 H95A 109.7 . . ?
C94 C95 H95A 109.7 . . ?
C96 C95 H95B 109.7 . . ?
C94 C95 H95B 109.7 . . ?
H95A C95 H95B 108.2 . . ?
C95 C96 C97 114(2) . . ?
C95 C96 H96A 108.8 . . ?
C97 C96 H96A 108.8 . . ?
C95 C96 H96B 108.8 . . ?
C97 C96 H96B 108.8 . . ?
H96A C96 H96B 107.7 . . ?
C96 C97 C98 106(2) . . ?
C96 C97 C102 119(3) . . ?
C98 C97 C102 112(2) . . ?
C96 C97 H97 106.7 . . ?
C98 C97 H97 106.7 . . ?
C102 C97 H97 106.7 . . ?
C93 C98 C97 114(2) . . ?
C93 C98 H98A 108.7 . . ?
C97 C98 H98A 108.7 . . ?
C93 C98 H98B 108.7 . . ?
C97 C98 H98B 108.7 . . ?
H98A C98 H98B 107.6 . . ?
C101 C99 C94 112.8(19) . . ?
C101 C99 C100 107.3(19) . . ?
C94 C99 C100 113(2) . . ?
C101 C99 H99 107.8 . . ?
C94 C99 H99 107.8 . . ?
C100 C99 H99 107.8 . . ?
C99 C100 H10A 109.5 . . ?
C99 C100 H10B 109.5 . . ?
H10A C100 H10B 109.5 . . ?
C99 C100 H10C 109.5 . . ?
H10A C100 H10C 109.5 . . ?
H10B C100 H10C 109.5 . . ?
C99 C101 H10D 109.5 . . ?
C99 C101 H10E 109.5 . . ?
H10D C101 H10E 109.5 . . ?
C99 C101 H10F 109.5 . . ?
H10D C101 H10F 109.5 . . ?
H10E C101 H10F 109.5 . . ?
C97 C102 H10G 109.5 . . ?
C97 C102 H10H 109.5 . . ?
H10G C102 H10H 109.5 . . ?
C97 C102 H10I 109.5 . . ?
H10G C102 H10I 109.5 . . ?
H10H C102 H10I 109.5 . . ?
F4 B1 F2 109.53(18) . . ?
F4 B1 F3 109.44(18) . . ?
F2 B1 F3 109.50(18) . . ?
F4 B1 F1 109.47(18) . . ?
F2 B1 F1 109.41(18) . . ?
F3 B1 F1 109.48(18) . . ?
F4B B1B F3B 109.50(18) . . ?
F4B B1B F1B 109.46(18) . . ?
F3B B1B F1B 109.49(18) . . ?
F4B B1B F2B 109.47(18) . . ?
F3B B1B F2B 109.45(18) . . ?
F1B B1B F2B 109.46(18) . . ?
C103 O21 C106 125(2) . . ?
O21 C103 C104 94.6(18) . . ?
O21 C103 H10J 112.8 . . ?
C104 C103 H10J 112.8 . . ?
O21 C103 H10K 112.8 . . ?
C104 C103 H10K 112.8 . . ?
H10J C103 H10K 110.3 . . ?
C105 C104 C103 111.1(9) . . ?
C105 C104 H10L 109.4 . . ?
C103 C104 H10L 109.4 . . ?
C105 C104 H10M 109.4 . . ?
C103 C104 H10M 109.4 . . ?
H10L C104 H10M 108.0 . . ?
C104 C105 C106 111.1(9) . . ?
C104 C105 H10N 109.4 . . ?
C106 C105 H10N 109.4 . . ?
C104 C105 H10O 109.4 . . ?
C106 C105 H10O 109.4 . . ?
H10N C105 H10O 108.0 . . ?
O21 C106 C105 94.6(18) . . ?
O21 C106 H10P 112.8 . . ?
C105 C106 H10P 112.8 . . ?
O21 C106 H10Q 112.8 . . ?
C105 C106 H10Q 112.8 . . ?
H10P C106 H10Q 110.3 . . ?
C116 O22 C113 125(2) . . ?
O22 C113 C114 94.5(18) . . ?
O22 C113 H11A 112.8 . . ?
C114 C113 H11A 112.8 . . ?
O22 C113 H11B 112.8 . . ?
C114 C113 H11B 112.8 . . ?
H11A C113 H11B 110.3 . . ?
C115 C114 C113 111.0(9) . . ?
C115 C114 H11C 109.4 . . ?
C113 C114 H11C 109.4 . . ?
C115 C114 H11D 109.4 . . ?
C113 C114 H11D 109.4 . . ?
H11C C114 H11D 108.0 . . ?
C116 C115 C114 111.0(9) . . ?
C116 C115 H11E 109.4 . . ?
C114 C115 H11E 109.4 . . ?
C116 C115 H11F 109.4 . . ?
C114 C115 H11F 109.4 . . ?
H11E C115 H11F 108.0 . . ?
O22 C116 C115 94.6(18) . . ?
O22 C116 H11G 112.8 . . ?
C115 C116 H11G 112.8 . . ?
O22 C116 H11H 112.8 . . ?
C115 C116 H11H 112.8 . . ?
H11G C116 H11H 110.3 . . ?
 
loop_
 _geom_torsion_atom_site_label_1
 _geom_torsion_atom_site_label_2
 _geom_torsion_atom_site_label_3
 _geom_torsion_atom_site_label_4
 _geom_torsion
 _geom_torsion_site_symmetry_1
 _geom_torsion_site_symmetry_2
 _geom_torsion_site_symmetry_3
 _geom_torsion_site_symmetry_4
 _geom_torsion_publ_flag
C5 N1 C1 C2 3(2) . . . . ?
Ag1 N1 C1 C2 -177.9(11) . . . . ?
C33 O1 C2 C1 3(2) . . . . ?
C33 O1 C2 C3 -176.7(15) . . . . ?
N1 C1 C2 O1 176.6(14) . . . . ?
N1 C1 C2 C3 -4(2) . . . . ?
O1 C2 C3 C4 -177.6(15) . . . . ?
C1 C2 C3 C4 3(2) . . . . ?
O1 C2 C3 C6 1(2) . . . . ?
C1 C2 C3 C6 -178.7(14) . . . . ?
C2 C3 C4 C5 -1(3) . . . . ?
C6 C3 C4 C5 -179.9(17) . . . . ?
C3 C4 C5 N1 1(3) . . . . ?
C1 N1 C5 C4 -1(2) . . . . ?
Ag1 N1 C5 C4 179.5(13) . . . . ?
C4 C3 C6 C11 33(3) . . . . ?
C2 C3 C6 C11 -145.3(17) . . . . ?
C4 C3 C6 C7 -144.1(19) . . . . ?
C2 C3 C6 C7 37(3) . . . . ?
C11 C6 C7 C8 -2(3) . . . . ?
C3 C6 C7 C8 175.1(17) . . . . ?
C6 C7 C8 C9 3(3) . . . . ?
C7 C8 C9 C10 0(3) . . . . ?
C7 C8 C9 C12 175.8(17) . . . . ?
C8 C9 C10 C11 -3(3) . . . . ?
C12 C9 C10 C11 -179.1(16) . . . . ?
C9 C10 C11 C6 4(3) . . . . ?
C3 C6 C11 C10 -178.7(16) . . . . ?
C7 C6 C11 C10 -1(3) . . . . ?
C8 C9 C12 C13 -14(3) . . . . ?
C10 C9 C12 C13 162.3(17) . . . . ?
C8 C9 C12 C16 167.6(16) . . . . ?
C10 C9 C12 C16 -16(3) . . . . ?
C8 C9 C12 Fe1 -107.5(19) . . . . ?
C10 C9 C12 Fe1 69(3) . . . . ?
C9 C12 C13 C14 178.8(17) . . . . ?
C16 C12 C13 C14 -2.2(18) . . . . ?
Fe1 C12 C13 C14 -58.3(12) . . . . ?
C9 C12 C13 Fe1 -122.9(17) . . . . ?
C16 C12 C13 Fe1 56.1(11) . . . . ?
C12 C13 C14 C15 1(2) . . . . ?
Fe1 C13 C14 C15 -58.7(16) . . . . ?
C12 C13 C14 Fe1 59.2(12) . . . . ?
C13 C14 C15 C16 2(3) . . . . ?
Fe1 C14 C15 C16 -57.2(15) . . . . ?
C13 C14 C15 Fe1 58.7(14) . . . . ?
C14 C15 C16 C12 -3(2) . . . . ?
Fe1 C15 C16 C12 -61.3(14) . . . . ?
C14 C15 C16 Fe1 58.4(16) . . . . ?
C13 C12 C16 C15 3(2) . . . . ?
C9 C12 C16 C15 -177.7(16) . . . . ?
Fe1 C12 C16 C15 61.4(14) . . . . ?
C13 C12 C16 Fe1 -58.1(11) . . . . ?
C9 C12 C16 Fe1 120.9(15) . . . . ?
C21 N2 C17 C18 4(2) . . . . ?
Ag2 N2 C17 C18 -179.6(12) . . . . ?
N2 C17 C18 C19 -2(3) . . . . ?
C17 C18 C19 C22 -176.5(15) . . . . ?
C17 C18 C19 C20 1(2) . . . . ?
C22 C19 C20 O5 -1(2) . . . . ?
C18 C19 C20 O5 -178.1(14) . . . . ?
C22 C19 C20 C21 175.7(15) . . . . ?
C18 C19 C20 C21 -1(2) . . . . ?
O5 C20 C21 N2 179.9(16) . . . . ?
C19 C20 C21 N2 3(3) . . . . ?
C17 N2 C21 C20 -5(2) . . . . ?
Ag2 N2 C21 C20 178.8(13) . . . . ?
C18 C19 C22 C27 -145.4(17) . . . . ?
C20 C19 C22 C27 38(2) . . . . ?
C18 C19 C22 C23 36(2) . . . . ?
C20 C19 C22 C23 -141.2(17) . . . . ?
C27 C22 C23 C24 0(3) . . . . ?
C19 C22 C23 C24 179.3(16) . . . . ?
C22 C23 C24 C25 -3(2) . . . . ?
C23 C24 C25 C28 -174.8(15) . . . . ?
C23 C24 C25 C26 4(2) . . . . ?
C28 C25 C26 C27 177.1(16) . . . . ?
C24 C25 C26 C27 -1(2) . . . . ?
C25 C26 C27 C22 -2(3) . . . . ?
C23 C22 C27 C26 2(3) . . . . ?
C19 C22 C27 C26 -176.6(17) . . . . ?
C26 C25 C28 C32 -18(2) . . . . ?
C24 C25 C28 C32 159.7(16) . . . . ?
C26 C25 C28 C29 161.3(15) . . . . ?
C24 C25 C28 C29 -21(2) . . . . ?
C26 C25 C28 Fe1 -108.7(18) . . . . ?
C24 C25 C28 Fe1 69(2) . . . . ?
C32 C28 C29 C30 1.3(17) . . . . ?
C25 C28 C29 C30 -178.4(15) . . . . ?
Fe1 C28 C29 C30 58.2(11) . . . . ?
C32 C28 C29 Fe1 -56.9(11) . . . . ?
C25 C28 C29 Fe1 123.3(15) . . . . ?
C28 C29 C30 C31 -0.1(19) . . . . ?
Fe1 C29 C30 C31 59.9(13) . . . . ?
C28 C29 C30 Fe1 -60.0(11) . . . . ?
C29 C30 C31 C32 -1(2) . . . . ?
Fe1 C30 C31 C32 58.8(12) . . . . ?
C29 C30 C31 Fe1 -59.9(12) . . . . ?
C25 C28 C32 C31 177.7(15) . . . . ?
C29 C28 C32 C31 -2.1(18) . . . . ?
Fe1 C28 C32 C31 -59.3(12) . . . . ?
C25 C28 C32 Fe1 -123.0(16) . . . . ?
C29 C28 C32 Fe1 57.2(11) . . . . ?
C30 C31 C32 C28 2(2) . . . . ?
Fe1 C31 C32 C28 61.2(12) . . . . ?
C30 C31 C32 Fe1 -59.2(13) . . . . ?
C2 O1 C33 C34 -175.3(17) . . . . ?
O1 C33 C34 O2 77(2) . . . . ?
C35 O2 C34 C33 -175(2) . . . . ?
C34 O2 C35 C36 175(2) . . . . ?
C37 O3 C36 C35 174(2) . . . . ?
O2 C35 C36 O3 -175(2) . . . . ?
C36 O3 C37 C38 178(2) . . . . ?
C39 O4 C38 C37 175(2) . . . . ?
O3 C37 C38 O4 71(3) . . . . ?
C21 C20 O5 C40 3(3) . . . . ?
C19 C20 O5 C40 179(3) . . . . ?
C21 C20 O5 C40B 0(4) . . . . ?
C19 C20 O5 C40B 177(3) . . . . ?
C20 O5 C40 C41 172.1(15) . . . . ?
C40B O5 C40 C41 -98(10) . . . . ?
O5 C40 C41 O6 65(3) . . . . ?
C40 C41 O6 C42 -174.7(14) . . . . ?
C41 O6 C42 C43 75(3) . . . . ?
O6 C42 C43 O7 136(3) . . . . ?
C42 C43 O7 C44 -165(3) . . . . ?
C43 O7 C44 C45 124(3) . . . . ?
O7 C44 C45 O8 158(3) . . . . ?
C44 C45 O8 C46 -152(3) . . . . ?
C20 O5 C40B C41B 178(2) . . . . ?
C40 O5 C40B C41B 86(10) . . . . ?
O5 C40B C41B O6B -52(5) . . . . ?
C40B C41B O6B C42B 156.6(18) . . . . ?
C41B O6B C42B C43B -141(4) . . . . ?
O6B C42B C43B O7B 150(3) . . . . ?
C42B C43B O7B C44B 146(4) . . . . ?
C43B O7B C44B C45B -172(4) . . . . ?
O7B C44B C45B O8B -50(5) . . . . ?
C44B C45B O8B C46B 151(3) . . . . ?
C51 N3 C47 C48 -3(2) . . . . ?
Ag1 N3 C47 C48 178.3(11) . . . . ?
N3 C47 C48 O9 -179.0(14) . . . . ?
N3 C47 C48 C49 1(2) . . . . ?
O9 C48 C49 C50 179.3(15) . . . . ?
C47 C48 C49 C50 -1(2) . . . . ?
O9 C48 C49 C52 0(2) . . . . ?
C47 C48 C49 C52 -179.6(14) . . . . ?
C48 C49 C50 C51 2(3) . . . . ?
C52 C49 C50 C51 -178.7(16) . . . . ?
C47 N3 C51 C50 4(2) . . . . ?
Ag1 N3 C51 C50 -176.7(13) . . . . ?
C49 C50 C51 N3 -4(3) . . . . ?
C50 C49 C52 C57 140.2(19) . . . . ?
C48 C49 C52 C57 -41(2) . . . . ?
C50 C49 C52 C53 -39(2) . . . . ?
C48 C49 C52 C53 139.5(15) . . . . ?
C57 C52 C53 C54 4(2) . . . . ?
C49 C52 C53 C54 -176.7(15) . . . . ?
C52 C53 C54 C55 -3(2) . . . . ?
C53 C54 C55 C56 0(2) . . . . ?
C53 C54 C55 C58 -179.6(16) . . . . ?
C54 C55 C56 C57 1(2) . . . . ?
C58 C55 C56 C57 -178.8(16) . . . . ?
C53 C52 C57 C56 -2(3) . . . . ?
C49 C52 C57 C56 178.3(17) . . . . ?
C55 C56 C57 C52 0(3) . . . . ?
C54 C55 C58 C59 17(3) . . . . ?
C56 C55 C58 C59 -162.5(17) . . . . ?
C54 C55 C58 C62 -164.7(18) . . . . ?
C56 C55 C58 C62 15(3) . . . . ?
C54 C55 C58 Fe2 -72(2) . . . . ?
C56 C55 C58 Fe2 107.9(18) . . . . ?
C62 C58 C59 C60 0(2) . . . . ?
C55 C58 C59 C60 178.5(16) . . . . ?
Fe2 C58 C59 C60 -59.0(14) . . . . ?
C62 C58 C59 Fe2 59.2(13) . . . . ?
C55 C58 C59 Fe2 -122.5(17) . . . . ?
C58 C59 C60 C61 0(2) . . . . ?
Fe2 C59 C60 C61 -59.6(13) . . . . ?
C58 C59 C60 Fe2 59.6(15) . . . . ?
C59 C60 C61 C62 0(2) . . . . ?
Fe2 C60 C61 C62 -59.4(14) . . . . ?
C59 C60 C61 Fe2 59.3(12) . . . . ?
C59 C58 C62 C61 0(2) . . . . ?
C55 C58 C62 C61 -178.5(18) . . . . ?
Fe2 C58 C62 C61 59.0(14) . . . . ?
C59 C58 C62 Fe2 -59.2(13) . . . . ?
C55 C58 C62 Fe2 122.5(18) . . . . ?
C60 C61 C62 C58 0(2) . . . . ?
Fe2 C61 C62 C58 -59.5(14) . . . . ?
C60 C61 C62 Fe2 59.7(13) . . . . ?
C67 N4 C63 C64 -1(2) . . . . ?
Ag2 N4 C63 C64 177.3(12) . . . . ?
C86 O13 C64 C63 -6(2) . . . . ?
C86 O13 C64 C65 172.8(16) . . . . ?
N4 C63 C64 O13 -179.3(15) . . . . ?
N4 C63 C64 C65 1(3) . . . . ?
O13 C64 C65 C66 179.8(13) . . . . ?
C63 C64 C65 C66 -1(2) . . . . ?
O13 C64 C65 C68 4(2) . . . . ?
C63 C64 C65 C68 -177.1(15) . . . . ?
C68 C65 C66 C67 176.0(15) . . . . ?
C64 C65 C66 C67 0(2) . . . . ?
C65 C66 C67 N4 1(3) . . . . ?
C63 N4 C67 C66 0(2) . . . . ?
Ag2 N4 C67 C66 -178.3(12) . . . . ?
C66 C65 C68 C73 -38(2) . . . . ?
C64 C65 C68 C73 137.5(16) . . . . ?
C66 C65 C68 C69 141.6(16) . . . . ?
C64 C65 C68 C69 -43(2) . . . . ?
C73 C68 C69 C70 3(2) . . . . ?
C65 C68 C69 C70 -176.9(16) . . . . ?
C68 C69 C70 C71 -5(2) . . . . ?
C69 C70 C71 C72 4(2) . . . . ?
C69 C70 C71 C74 -175.5(16) . . . . ?
C70 C71 C72 C73 -2(2) . . . . ?
C74 C71 C72 C73 178.2(15) . . . . ?
C65 C68 C73 C72 179.4(15) . . . . ?
C69 C68 C73 C72 0(2) . . . . ?
C71 C72 C73 C68 0(2) . . . . ?
C70 C71 C74 C75 13(3) . . . . ?
C72 C71 C74 C75 -166.5(17) . . . . ?
C70 C71 C74 C78 -162.1(17) . . . . ?
C72 C71 C74 C78 18(3) . . . . ?
C70 C71 C74 Fe2 106.9(18) . . . . ?
C72 C71 C74 Fe2 -73(2) . . . . ?
C78 C74 C75 C76 -2.5(19) . . . . ?
C71 C74 C75 C76 -179.0(17) . . . . ?
Fe2 C74 C75 C76 57.1(13) . . . . ?
C78 C74 C75 Fe2 -59.7(11) . . . . ?
C71 C74 C75 Fe2 123.9(17) . . . . ?
C74 C75 C76 C77 1(2) . . . . ?
Fe2 C75 C76 C77 59.5(15) . . . . ?
C74 C75 C76 Fe2 -58.3(12) . . . . ?
C75 C76 C77 C78 1(2) . . . . ?
Fe2 C76 C77 C78 61.5(13) . . . . ?
C75 C76 C77 Fe2 -60.8(14) . . . . ?
C76 C77 C78 C74 -2(2) . . . . ?
Fe2 C77 C78 C74 58.1(14) . . . . ?
C76 C77 C78 Fe2 -60.6(13) . . . . ?
C75 C74 C78 C77 3(2) . . . . ?
C71 C74 C78 C77 179.6(17) . . . . ?
Fe2 C74 C78 C77 -58.0(15) . . . . ?
C75 C74 C78 Fe2 61.3(12) . . . . ?
C71 C74 C78 Fe2 -122.4(17) . . . . ?
C47 C48 O9 C79 2(2) . . . . ?
C49 C48 O9 C79 -178.0(14) . . . . ?
C48 O9 C79 C80 -173.3(13) . . . . ?
O9 C79 C80 O10 -72.6(18) . . . . ?
C79 C80 O10 C81 -174.8(16) . . . . ?
C79 C80 O10 C81B -179.2(18) . . . . ?
C80 O10 C81 C82 -113.9(17) . . . . ?
C81B O10 C81 C82 -23(5) . . . . ?
O10 C81 C82 O11 103(4) . . . . ?
C81 C82 O11 C83 -179(4) . . . . ?
C82 O11 C83 C84 147(6) . . . . ?
O11 C83 C84 O12 24(9) . . . . ?
C83 C84 O12 C85 -88(8) . . . . ?
C80 O10 C81B C82B -89.5(18) . . . . ?
C81 O10 C81B C82B 180(100) . . . . ?
O10 C81B C82B O11B 90(3) . . . . ?
C81B C82B O11B C83B -161(3) . . . . ?
C82B O11B C83B C84B -84(4) . . . . ?
O11B C83B C84B O12B 92(4) . . . . ?
C83B C84B O12B C85B 137(6) . . . . ?
C64 O13 C86 C87 -176.9(16) . . . . ?
C88 O14 C87 C86 164.8(17) . . . . ?
O13 C86 C87 O14 -73(2) . . . . ?
C87 O14 C88 C89 177(2) . . . . ?
C90 O15 C89 C88 -134(3) . . . . ?
C90B O15 C89 C88 -155(3) . . . . ?
O14 C88 C89 O15 -169.2(19) . . . . ?
C89 O15 C90 C91 -158(2) . . . . ?
C90B O15 C90 C91 -64(2) . . . . ?
O15 C90 C91 O16 -57(3) . . . . ?
C90 C91 O16 C92 167(3) . . . . ?
C89 O15 C90B C91B 173(2) . . . . ?
C90 O15 C90B C91B 79(3) . . . . ?
O15 C90B C91B O16B 65(4) . . . . ?
C90B C91B O16B C92B 158(6) . . . . ?
O17 S1 O20 C93 -169.0(14) . . . . ?
O18 S1 O20 C93 71.4(15) . . . . ?
O19 S1 O20 C93 -49.3(15) . . . . ?
S1 O20 C93 C94 -132.7(17) . . . . ?
S1 O20 C93 C98 105(2) . . . . ?
C98 C93 C94 C95 -51(3) . . . . ?
O20 C93 C94 C95 -170.9(18) . . . . ?
C98 C93 C94 C99 179.9(19) . . . . ?
O20 C93 C94 C99 60(2) . . . . ?
C93 C94 C95 C96 52(3) . . . . ?
C99 C94 C95 C96 -180(2) . . . . ?
C94 C95 C96 C97 -57(3) . . . . ?
C95 C96 C97 C98 58(3) . . . . ?
C95 C96 C97 C102 -176(2) . . . . ?
C94 C93 C98 C97 56(3) . . . . ?
O20 C93 C98 C97 175(2) . . . . ?
C96 C97 C98 C93 -56(3) . . . . ?
C102 C97 C98 C93 173(3) . . . . ?
C93 C94 C99 C101 72(3) . . . . ?
C95 C94 C99 C101 -57(3) . . . . ?
C93 C94 C99 C100 -166(2) . . . . ?
C95 C94 C99 C100 65(3) . . . . ?
C106 O21 C103 C104 6(3) . . . . ?
O21 C103 C104 C105 -15(4) . . . . ?
C103 C104 C105 C106 21(6) . . . . ?
C103 O21 C106 C105 5(3) . . . . ?
C104 C105 C106 O21 -14(4) . . . . ?
C116 O22 C113 C114 -6(3) . . . . ?
O22 C113 C114 C115 16(4) . . . . ?
C113 C114 C115 C116 -22(6) . . . . ?
C113 O22 C116 C115 -5(3) . . . . ?
C114 C115 C116 O22 15(4) . . . . ?
 
_refine_diff_density_max    1.455
_refine_diff_density_min   -0.900
_refine_diff_density_rms    0.123

_shelxl_version_number 2014-3

_shelx_res_file
;
TITL Fc-tri2
CELL 0.71073 13.5851 26.9239 27.6686 90 90 90
ZERR 4 0.0013 0.0026 0.0030 0 0 0
LATT -1
SYMM 1/2-x,-y,1/2+z
SYMM 1/2+x,1/2-y,-z
SYMM -x,1/2+y,1/2-z
SFAC C B N O F S Fe Ag H
UNIT 424 4 16 84 16 4 8 8 524
FMAP 2
PLAN 10
L.S. 10
TEMP -183
SIZE 0.23 0.09 0.03
REM red, plate
BOND $H
CONF
ACTA
EQIV $1 -x+1/2, -y, z+1/2
FREE C46B O4_$1
FREE C83 O12
FREE C85 C83
WGHT    0.158600
FVAR       0.52314   0.61550   0.55440   0.66562   0.69915   0.65812
MOLE 1
AG1   8    0.512837    0.406056    0.504278    11.00000    0.04546    0.04509 =
         0.09196    0.00140   -0.00598    0.00189
AG2   8    0.280316    0.398450    0.476193    11.00000    0.04747    0.05045 =
         0.09931    0.00436    0.00179    0.00004
FE1   7    0.373236   -0.029797    0.582987    11.00000    0.03653    0.04389 =
         0.12744    0.00848   -0.01239   -0.00444
FE2   7    0.371520    0.839171    0.423759    11.00000    0.04342    0.04330 =
         0.10569    0.00240    0.00141    0.00270
S1    6    0.423207    0.381291    0.367329    11.00000    0.05602    0.06936 =
         0.07637   -0.00068   -0.00100   -0.00077
O1    4    0.485735    0.211747    0.454450    11.00000    0.04461    0.04574 =
         0.12465   -0.01684    0.00074    0.00084
O2    4    0.356453    0.177896    0.377502    11.00000    0.08660    0.07050 =
         0.11780   -0.02207    0.01508   -0.01907
O3    4    0.183493    0.084689    0.340997    11.00000    0.09361    0.08878 =
         0.12511   -0.03203    0.00911   -0.01574
O4    4    0.101894   -0.012181    0.350418    11.00000    0.08628    0.09645 =
         0.14030   -0.00065   -0.00979   -0.02010
O13   4    0.270947    0.591314    0.534817    11.00000    0.06115    0.05925 =
         0.06839   -0.00165   -0.00963    0.00662
O14   4    0.370678    0.637436    0.614894    11.00000    0.06939    0.07641 =
         0.08689   -0.01897   -0.00066   -0.01396
O15   4    0.483553    0.746076    0.663150    11.00000    0.17347    0.12729 =
         0.12186   -0.05325    0.05455   -0.06300
N1    3    0.508715    0.328630    0.519913    11.00000    0.02404    0.03716 =
         0.12471   -0.00364   -0.01639    0.00283
N2    3    0.266012    0.320763    0.492164    11.00000    0.02255    0.04204 =
         0.11033    0.00116    0.00037   -0.00134
N3    3    0.515532    0.484904    0.494316    11.00000    0.02804    0.03618 =
         0.09188    0.01313   -0.00090    0.00117
N4    3    0.266691    0.476565    0.466416    11.00000    0.03956    0.05183 =
         0.07893   -0.00684    0.00472   -0.00430
C1    1    0.502661    0.294881    0.483806    11.00000    0.01924    0.05216 =
         0.09721    0.00138    0.00201   -0.00416
AFIX  43
H1    9    0.502638    0.306804    0.451491    11.00000   -1.20000
AFIX   0
C2    1    0.496502    0.244117    0.490937    11.00000    0.02099    0.05344 =
         0.10995    0.01421    0.00641    0.00248
C3    1    0.502227    0.224836    0.539187    11.00000    0.02686    0.05335 =
         0.13022    0.00244   -0.01066    0.00932
C4    1    0.509494    0.261871    0.574476    11.00000    0.05278    0.04976 =
         0.07364    0.00276   -0.01389   -0.00815
AFIX  43
H4    9    0.512151    0.251685    0.607323    11.00000   -1.20000
AFIX   0
C5    1    0.512956    0.310481    0.565267    11.00000    0.04401    0.05714 =
         0.08731    0.00575   -0.01268   -0.00306
AFIX  43
H5    9    0.518594    0.333034    0.591527    11.00000   -1.20000
AFIX   0
C6    1    0.498380    0.172022    0.549627    11.00000    0.03228    0.06718 =
         0.09891   -0.00252   -0.00949   -0.00068
C7    1    0.544369    0.133841    0.519200    11.00000    0.04028    0.06201 =
         0.11978    0.02039    0.00878    0.00222
AFIX  43
H7    9    0.575008    0.142174    0.489421    11.00000   -1.20000
AFIX   0
C8    1    0.541464    0.085627    0.535379    11.00000    0.02812    0.05843 =
         0.12140    0.02064    0.01000    0.01086
AFIX  43
H8    9    0.573866    0.060905    0.516749    11.00000   -1.20000
AFIX   0
C9    1    0.494003    0.071058    0.577275    11.00000    0.03291    0.04094 =
         0.14801   -0.00369   -0.02249   -0.00334
C10   1    0.446316    0.106318    0.605571    11.00000    0.05666    0.04781 =
         0.12087    0.00972   -0.02551   -0.01726
AFIX  43
H10   9    0.410584    0.096684    0.633556    11.00000   -1.20000
AFIX   0
C11   1    0.452038    0.156016    0.592028    11.00000    0.05069    0.03723 =
         0.10551    0.00643   -0.01897   -0.00182
AFIX  43
H11   9    0.423094    0.180239    0.612554    11.00000   -1.20000
AFIX   0
C12   1    0.491824    0.018040    0.587568    11.00000    0.02851    0.04080 =
         0.12427    0.01845   -0.02314   -0.00838
C13   1    0.514528   -0.023077    0.556483    11.00000    0.01699    0.04383 =
         0.19326    0.01879   -0.01095   -0.00533
AFIX  43
H13   9    0.533758   -0.021212    0.523522    11.00000   -1.20000
AFIX   0
C14   1    0.502427   -0.068717    0.585261    11.00000    0.04468    0.04583 =
         0.24229    0.01317   -0.02704   -0.00012
AFIX  43
H14   9    0.513124   -0.101587    0.573935    11.00000   -1.20000
AFIX   0
C15   1    0.471846   -0.055415    0.633187    11.00000    0.06434    0.04707 =
         0.19981    0.02800   -0.05290   -0.01036
AFIX  43
H15   9    0.460117   -0.077493    0.659343    11.00000   -1.20000
AFIX   0
C16   1    0.462547   -0.003194    0.633977    11.00000    0.04867    0.07940 =
         0.11624    0.01654   -0.01790   -0.00762
AFIX  43
H16   9    0.440329    0.015539    0.660951    11.00000   -1.20000
AFIX   0
C17   1    0.261763    0.286358    0.459536    11.00000    0.02806    0.04119 =
         0.08256    0.00511   -0.00486   -0.01064
AFIX  43
H17   9    0.265597    0.296259    0.426635    11.00000   -1.20000
AFIX   0
C18   1    0.252180    0.236947    0.469078    11.00000    0.03405    0.06282 =
         0.10494   -0.00665   -0.00875   -0.01225
AFIX  43
H18   9    0.247220    0.214264    0.442891    11.00000   -1.20000
AFIX   0
C19   1    0.249366    0.218172    0.517851    11.00000    0.02738    0.07012 =
         0.08772    0.00049    0.00300    0.01117
C20   1    0.256543    0.257577    0.554119    11.00000    0.02137    0.07026 =
         0.10478   -0.00219   -0.00427    0.00762
C21   1    0.266817    0.305663    0.539635    11.00000    0.05220    0.06159 =
         0.06209    0.00774    0.00615    0.00738
AFIX  43
H21   9    0.275057    0.330315    0.563864    11.00000   -1.20000
AFIX   0
C22   1    0.244811    0.165953    0.528194    11.00000    0.03788    0.05757 =
         0.09969    0.01537   -0.01092   -0.00193
C23   1    0.295696    0.132900    0.497937    11.00000    0.02731    0.07616 =
         0.07219   -0.01422   -0.00561    0.00120
AFIX  43
H23   9    0.331179    0.145882    0.471182    11.00000   -1.20000
AFIX   0
C24   1    0.296098    0.082464    0.505573    11.00000    0.04804    0.06437 =
         0.06793   -0.01023   -0.00699   -0.00638
AFIX  43
H24   9    0.328505    0.060958    0.483488    11.00000   -1.20000
AFIX   0
C25   1    0.246261    0.062301    0.547931    11.00000    0.03563    0.04035 =
         0.08490   -0.00907   -0.01060   -0.00505
C26   1    0.195936    0.097254    0.576590    11.00000    0.04361    0.05605 =
         0.07043   -0.00677    0.00658   -0.00297
AFIX  43
H26   9    0.161434    0.085635    0.604232    11.00000   -1.20000
AFIX   0
C27   1    0.194042    0.146580    0.566881    11.00000    0.04508    0.04621 =
         0.07722    0.00955    0.00383   -0.00227
AFIX  43
H27   9    0.157063    0.168134    0.587113    11.00000   -1.20000
AFIX   0
C28   1    0.252040    0.011443    0.558964    11.00000    0.02555    0.06242 =
         0.08573    0.00554   -0.00726   -0.00455
C29   1    0.277600   -0.028452    0.524807    11.00000    0.02064    0.05955 =
         0.11481   -0.00508    0.00835   -0.01493
AFIX  43
H29   9    0.294636   -0.024844    0.491692    11.00000   -1.20000
AFIX   0
C30   1    0.271417   -0.074773    0.552256    11.00000    0.04358    0.02312 =
         0.12953    0.00222   -0.01950   -0.00141
AFIX  43
H30   9    0.284054   -0.106901    0.539491    11.00000   -1.20000
AFIX   0
C31   1    0.244304   -0.064904    0.599828    11.00000    0.04638    0.04494 =
         0.13290    0.00852   -0.00967   -0.00811
AFIX  43
H31   9    0.234135   -0.088557    0.624812    11.00000   -1.20000
AFIX   0
C32   1    0.234561   -0.010951    0.603762    11.00000    0.03824    0.08074 =
         0.08044    0.03469   -0.00467    0.00719
AFIX  43
H32   9    0.218638    0.006399    0.632619    11.00000   -1.20000
AFIX   0
C33   1    0.485355    0.230409    0.406465    11.00000    0.04832    0.06652 =
         0.09439    0.00741    0.00851    0.00012
AFIX  23
H33A  9    0.550133    0.245109    0.398462    11.00000   -1.20000
H33B  9    0.434253    0.256355    0.402824    11.00000   -1.20000
AFIX   0
C34   1    0.464104    0.187888    0.374174    11.00000    0.12608    0.07634 =
         0.11594   -0.01741    0.04452   -0.01411
AFIX  23
H34A  9    0.501967    0.158308    0.384475    11.00000   -1.20000
H34B  9    0.482565    0.196057    0.340485    11.00000   -1.20000
AFIX   0
C35   1    0.323573    0.136791    0.352876    11.00000    0.08222    0.09398 =
         0.15026   -0.03792    0.01110   -0.02434
AFIX  23
H35A  9    0.361420    0.107181    0.363111    11.00000   -1.20000
H35B  9    0.333690    0.141532    0.317743    11.00000   -1.20000
AFIX   0
C36   1    0.216679    0.128995    0.363038    11.00000    0.10199    0.08567 =
         0.09911   -0.00301   -0.01383   -0.02384
AFIX  23
H36A  9    0.206037    0.127063    0.398385    11.00000   -1.20000
H36B  9    0.178423    0.157502    0.350470    11.00000   -1.20000
AFIX   0
C37   1    0.086579    0.074077    0.353868    11.00000    0.13625    0.10341 =
         0.07702   -0.03006    0.01336   -0.04307
AFIX  23
H37A  9    0.043637    0.102308    0.344864    11.00000   -1.20000
H37B  9    0.082250    0.069444    0.389299    11.00000   -1.20000
AFIX   0
C38   1    0.053499    0.030015    0.329941    11.00000    0.08871    0.09918 =
         0.13481   -0.01737   -0.02869   -0.00161
AFIX  23
H38A  9   -0.018641    0.026587    0.333753    11.00000   -1.20000
H38B  9    0.068495    0.032163    0.294988    11.00000   -1.20000
AFIX   0
C39   1    0.069370   -0.062027    0.332726    11.00000    0.09094    0.12966 =
         0.13589   -0.03331    0.00023   -0.02461
AFIX 133
H39A  9    0.002380   -0.068699    0.344149    11.00000   -1.50000
H39B  9    0.114041   -0.087612    0.345120    11.00000   -1.50000
H39C  9    0.070374   -0.062437    0.297312    11.00000   -1.50000
AFIX   0
REM ###########################################################################
REM Disorder Side Chain
REM ###### DISTANCE ############################################
DFIX 1.426 0.002 O5 C40 O5 C40B
DFIX 1.530 0.002 C40 C41 C40B C41B C42 C43 C42B C43B C44 C45 C44B C45B
DFIX 1.426 0.002 C41 O6 C41B O6B O6 C42 O6B C42B C43 O7 C43B O7B =
           O7 C44 O7B C44B O8 C45 O8B C45B O8 C46 O8B C46B
REM ###### ANGLE ###############################################
DANG 2.329 0.002 C20 C40 C20 C40B
DANG 2.415 0.002 O5 C41 O5 C41B
DANG 2.415 0.002 C40 O6 C40B O6B O6 C43 O6B C43B C42 O7 C42B O7B =
           O7 C45 O7B C45B C44 O8 C44B O8B
DANG 2.329 0.002 C41 C42 C41B C42B C43 C44 C43B C44B C45 C46 C45B C46B
SADI 0.002 C44 C46 C44B C46B
O5    4    0.257120    0.241764    0.599519    11.00000    0.08197    0.06362 =
         0.06423   -0.00504   -0.00219    0.00166
PART 1 21.0
EADP C40 > C46B
C40   1    0.265188    0.279487    0.635460    21.00000    0.21873    0.15842 =
         0.12654    0.01752   -0.04623    0.04162
AFIX  23
H40A  9    0.214850    0.305420    0.629752    21.00000   -1.20000
H40B  9    0.330928    0.295237    0.633590    21.00000   -1.20000
AFIX   0
C41   1    0.250434    0.256605    0.685551    21.00000    0.21873    0.15842 =
         0.12654    0.01752   -0.04623    0.04162
AFIX  23
H41A  9    0.249634    0.283132    0.710326    21.00000   -1.20000
H41B  9    0.186514    0.238989    0.686749    21.00000   -1.20000
AFIX   0
O6    4    0.328413    0.222651    0.695418    21.00000    0.21873    0.15842 =
         0.12654    0.01752   -0.04623    0.04162
C42   1    0.309966    0.197904    0.740070    21.00000    0.21873    0.15842 =
         0.12654    0.01752   -0.04623    0.04162
AFIX  23
H42A  9    0.288798    0.222316    0.764727    21.00000   -1.20000
H42B  9    0.371047    0.181746    0.751627    21.00000   -1.20000
AFIX   0
C43   1    0.229549    0.158822    0.732959    21.00000    0.21873    0.15842 =
         0.12654    0.01752   -0.04623    0.04162
AFIX  23
H43A  9    0.166496    0.171250    0.746207    21.00000   -1.20000
H43B  9    0.220376    0.152281    0.698038    21.00000   -1.20000
AFIX   0
O7    4    0.256827    0.114065    0.757004    21.00000    0.21873    0.15842 =
         0.12654    0.01752   -0.04623    0.04162
C44   1    0.195762    0.074372    0.740684    21.00000    0.21873    0.15842 =
         0.12654    0.01752   -0.04623    0.04162
AFIX  23
H44A  9    0.151307    0.086395    0.714858    21.00000   -1.20000
H44B  9    0.154829    0.062049    0.767749    21.00000   -1.20000
AFIX   0
C45   1    0.260212    0.032254    0.721291    21.00000    0.21873    0.15842 =
         0.12654    0.01752   -0.04623    0.04162
AFIX  23
H45A  9    0.280739    0.039779    0.687750    21.00000   -1.20000
H45B  9    0.320160    0.029051    0.741396    21.00000   -1.20000
AFIX   0
O8    4    0.206153   -0.013140    0.722273    21.00000    0.21873    0.15842 =
         0.12654    0.01752   -0.04623    0.04162
C46   1    0.272498   -0.053772    0.727784    21.00000    0.21873    0.15842 =
         0.12654    0.01752   -0.04623    0.04162
AFIX 133
H46A  9    0.322524   -0.052438    0.702299    21.00000   -1.50000
H46B  9    0.236038   -0.085083    0.725387    21.00000   -1.50000
H46C  9    0.304538   -0.051727    0.759456    21.00000   -1.50000
AFIX   0
PART 0
PART 2 -21.0
C40B  1    0.269501    0.279307    0.635355   -21.00000    0.21873    0.15842 =
         0.12654    0.01752   -0.04623    0.04162
AFIX  23
H40C  9    0.216960    0.304563    0.632073   -21.00000   -1.20000
H40D  9    0.333786    0.295994    0.630845   -21.00000   -1.20000
AFIX   0
C41B  1    0.264927    0.255816    0.685649   -21.00000    0.21873    0.15842 =
         0.12654    0.01752   -0.04623    0.04162
AFIX  23
H41C  9    0.323423    0.234541    0.690824   -21.00000   -1.20000
H41D  9    0.265012    0.282164    0.710606   -21.00000   -1.20000
AFIX   0
O6B   4    0.177636    0.226730    0.689815   -21.00000    0.21873    0.15842 =
         0.12654    0.01752   -0.04623    0.04162
C42B  1    0.190794    0.189983    0.726375   -21.00000    0.21873    0.15842 =
         0.12654    0.01752   -0.04623    0.04162
AFIX  23
H42C  9    0.160873    0.201512    0.757011   -21.00000   -1.20000
H42D  9    0.261919    0.184460    0.732015   -21.00000   -1.20000
AFIX   0
C43B  1    0.142192    0.141416    0.710385   -21.00000    0.21873    0.15842 =
         0.12654    0.01752   -0.04623    0.04162
AFIX  23
H43C  9    0.072799    0.140753    0.721293   -21.00000   -1.20000
H43D  9    0.142932    0.139093    0.674677   -21.00000   -1.20000
AFIX   0
O7B   4    0.194195    0.100398    0.730629   -21.00000    0.21873    0.15842 =
         0.12654    0.01752   -0.04623    0.04162
C44B  1    0.126777    0.061219    0.741007   -21.00000    0.21873    0.15842 =
         0.12654    0.01752   -0.04623    0.04162
AFIX  23
H44C  9    0.100326    0.047446    0.710479   -21.00000   -1.20000
H44D  9    0.070976    0.074222    0.760229   -21.00000   -1.20000
AFIX   0
C45B  1    0.179646    0.020349    0.769354   -21.00000    0.21873    0.15842 =
         0.12654    0.01752   -0.04623    0.04162
AFIX  23
H45C  9    0.194353    0.032152    0.802463   -21.00000   -1.20000
H45D  9    0.136718   -0.009254    0.771849   -21.00000   -1.20000
AFIX   0
O8B   4    0.268891    0.007500    0.745304   -21.00000    0.21873    0.15842 =
         0.12654    0.01752   -0.04623    0.04162
C46B  1    0.338991   -0.009739    0.779811   -21.00000    0.21873    0.15842 =
         0.12654    0.01752   -0.04623    0.04162
AFIX 133
H46D  9    0.328526    0.007354    0.810657   -21.00000   -1.50000
H46E  9    0.405655   -0.002816    0.768073   -21.00000   -1.50000
H46F  9    0.330961   -0.045601    0.784414   -21.00000   -1.50000
AFIX   0
PART 0
REM ###########################################################################
C47   1    0.509107    0.502517    0.448311    11.00000    0.03012    0.05281 =
         0.08191   -0.01026   -0.01068   -0.00841
AFIX  43
H47   9    0.505560    0.479486    0.422357    11.00000   -1.20000
AFIX   0
C48   1    0.507545    0.553373    0.437926    11.00000    0.01982    0.07941 =
         0.07019   -0.00525    0.00297    0.00727
C49   1    0.514219    0.587690    0.476366    11.00000    0.02660    0.04342 =
         0.07311   -0.00266   -0.00307    0.00274
C50   1    0.520870    0.567220    0.521968    11.00000    0.05673    0.05826 =
         0.07359   -0.00421   -0.00437    0.00308
AFIX  43
H50   9    0.523037    0.589004    0.548957    11.00000   -1.20000
AFIX   0
C51   1    0.524507    0.517129    0.530326    11.00000    0.05547    0.03674 =
         0.08876   -0.00582   -0.00168   -0.00284
AFIX  43
H51   9    0.533585    0.505282    0.562359    11.00000   -1.20000
AFIX   0
C52   1    0.512474    0.641940    0.468562    11.00000    0.05506    0.05528 =
         0.05007   -0.00139   -0.00443    0.00813
C53   1    0.457742    0.672097    0.501617    11.00000    0.03179    0.05791 =
         0.06718   -0.00020   -0.01130    0.00640
AFIX  43
H53   9    0.426479    0.657341    0.528766    11.00000   -1.20000
AFIX   0
C54   1    0.450714    0.720523    0.494343    11.00000    0.03612    0.04592 =
         0.06535   -0.00567    0.00141    0.00919
AFIX  43
H54   9    0.411460    0.739226    0.516165    11.00000   -1.20000
AFIX   0
C55   1    0.496705    0.745789    0.457073    11.00000    0.03013    0.05989 =
         0.09770   -0.01325   -0.00296    0.00938
C56   1    0.555391    0.715780    0.424661    11.00000    0.04204    0.04934 =
         0.09660    0.00047   -0.00927   -0.00114
AFIX  43
H56   9    0.590126    0.730901    0.398747    11.00000   -1.20000
AFIX   0
C57   1    0.560694    0.665024    0.431565    11.00000    0.05010    0.05474 =
         0.08637   -0.01631    0.01538    0.00385
AFIX  43
H57   9    0.599026    0.645622    0.409926    11.00000   -1.20000
AFIX   0
C58   1    0.489862    0.799698    0.448857    11.00000    0.04761    0.04240 =
         0.08862   -0.00641   -0.00051   -0.00549
C59   1    0.458746    0.833612    0.482982    11.00000    0.04061    0.05811 =
         0.15022    0.01199   -0.00669    0.00652
AFIX  43
H59   9    0.437449    0.825254    0.514658    11.00000   -1.20000
AFIX   0
C60   1    0.462953    0.883603    0.463984    11.00000    0.05045    0.04139 =
         0.17055   -0.01516   -0.01641   -0.00031
AFIX  43
H60   9    0.445650    0.913578    0.479983    11.00000   -1.20000
AFIX   0
C61   1    0.499577    0.877756    0.414930    11.00000    0.04098    0.04577 =
         0.19396    0.04093    0.01539    0.01073
AFIX  43
H61   9    0.511023    0.903532    0.392166    11.00000   -1.20000
AFIX   0
C62   1    0.514949    0.826166    0.407572    11.00000    0.03711    0.03602 =
         0.14146   -0.00665    0.02126   -0.00154
AFIX  43
H62   9    0.538989    0.811780    0.378528    11.00000   -1.20000
AFIX   0
C63   1    0.270718    0.507879    0.503665    11.00000    0.04200    0.05975 =
         0.07838    0.01897   -0.00219   -0.01072
AFIX  43
H63   9    0.276993    0.494796    0.535403    11.00000   -1.20000
AFIX   0
C64   1    0.265987    0.559567    0.497508    11.00000    0.03929    0.05225 =
         0.06971   -0.00633    0.00142    0.00468
C65   1    0.254216    0.581363    0.450049    11.00000    0.02331    0.07222 =
         0.08029   -0.00122    0.00088   -0.00136
C66   1    0.250087    0.545234    0.413256    11.00000    0.02520    0.04978 =
         0.08220   -0.00104    0.00220    0.00530
AFIX  43
H66   9    0.242301    0.556141    0.380828    11.00000   -1.20000
AFIX   0
C67   1    0.256595    0.496030    0.421622    11.00000    0.04064    0.07698 =
         0.05649   -0.01108   -0.00025   -0.00499
AFIX  43
H67   9    0.253972    0.474006    0.394827    11.00000   -1.20000
AFIX   0
C68   1    0.253465    0.633919    0.441719    11.00000    0.03583    0.05036 =
         0.06442    0.00076    0.00076   -0.00291
C69   1    0.202068    0.668578    0.472001    11.00000    0.03871    0.05861 =
         0.07684   -0.00032   -0.01044   -0.00030
AFIX  43
H69   9    0.168846    0.657217    0.500119    11.00000   -1.20000
AFIX   0
C70   1    0.200915    0.717473    0.460504    11.00000    0.04152    0.05830 =
         0.04638   -0.00548   -0.00296    0.01530
AFIX  43
H70   9    0.161996    0.739330    0.479514    11.00000   -1.20000
AFIX   0
C71   1    0.254261    0.737063    0.422063    11.00000    0.03401    0.06291 =
         0.07338    0.00104   -0.00398    0.01209
C72   1    0.305611    0.703416    0.392382    11.00000    0.04579    0.05145 =
         0.06317    0.00069    0.00157   -0.00547
AFIX  43
H72   9    0.341364    0.715299    0.365234    11.00000   -1.20000
AFIX   0
C73   1    0.304226    0.652973    0.402611    11.00000    0.03643    0.08507 =
         0.03856   -0.02001   -0.01057   -0.00347
AFIX  43
H73   9    0.339237    0.630862    0.382106    11.00000   -1.20000
AFIX   0
C74   1    0.257365    0.790393    0.412582    11.00000    0.03936    0.06938 =
         0.07795    0.00582   -0.01294   -0.00138
C75   1    0.226691    0.829125    0.443899    11.00000    0.03665    0.05887 =
         0.09275   -0.02169    0.00611    0.00386
AFIX  43
H75   9    0.200855    0.825169    0.475572    11.00000   -1.20000
AFIX   0
C76   1    0.241281    0.874118    0.419826    11.00000    0.07734    0.04120 =
         0.08834   -0.00515   -0.00492   -0.01139
AFIX  43
H76   9    0.227686    0.905895    0.433174    11.00000   -1.20000
AFIX   0
C77   1    0.279289    0.865873    0.372577    11.00000    0.08074    0.02815 =
         0.10853    0.01065   -0.01977   -0.00431
AFIX  43
H77   9    0.296346    0.889972    0.348938    11.00000   -1.20000
AFIX   0
C78   1    0.285597    0.815647    0.369012    11.00000    0.04228    0.06874 =
         0.07159    0.00454    0.00151   -0.01227
AFIX  43
H78   9    0.306557    0.798926    0.340582    11.00000   -1.20000
AFIX   0
REM ############################################################################
EADP C81 C81B
EADP C82 > C85B
DFIX 1.426 0.002 O9 C79 O10 C80 O10 C81 O11 C82 O11 C83 O12 C84 O12 C85
DFIX 1.426 0.002 O10 C81B O11B C82B O11B C83B O12B C84B O12B C85B
DFIX 1.53 0.002 C79 C80 C81 C82 C83 C84
DFIX 1.53 0.002 C81B C82B C83B C84B
DANG 2.415 0.002 O10 C82 O10 C82B C81 O11 C81B O11B O11 C84 O11B C84B
DANG 2.329 0.002 C80 C81 C80 C81B C82 C83 C82B C83B C84 C85 C84B C85B
SADI 0.002 C83 C85 C83B C85B
O9    4    0.499840    0.570671    0.392881    11.00000    0.04985    0.04616 =
         0.06314   -0.00466   -0.00431    0.00837
C79   1    0.489830    0.536415    0.353878    11.00000    0.06082    0.05224 =
         0.08095   -0.00455   -0.00713    0.01568
AFIX  23
H79A  9    0.426059    0.518795    0.356302    11.00000   -1.20000
H79B  9    0.543331    0.511482    0.355127    11.00000   -1.20000
AFIX   0
C80   1    0.494946    0.565368    0.306354    11.00000    0.08237    0.08187 =
         0.06619   -0.01207   -0.01225    0.01432
AFIX  23
H80A  9    0.550768    0.589004    0.306572    11.00000   -1.20000
H80B  9    0.502441    0.542565    0.278528    11.00000   -1.20000
AFIX   0
O10   4    0.403327    0.591073    0.304111    11.00000    0.10028    0.09413 =
         0.09816    0.00158    0.00254    0.02971
PART 3 31.0
C81   1    0.395324    0.616180    0.258913    31.00000    0.24082    0.20555 =
         0.26092    0.04005    0.01113    0.01114
AFIX  23
H81A  9    0.333599    0.606247    0.242531    31.00000   -1.20000
H81B  9    0.451287    0.606898    0.237850    31.00000   -1.20000
AFIX   0
C82   1    0.395495    0.672335    0.267347    31.00000    0.24082    0.20555 =
         0.26092    0.04005    0.01113    0.01114
AFIX  23
H82A  9    0.344598    0.688197    0.246914    31.00000   -1.20000
H82B  9    0.379870    0.679497    0.301593    31.00000   -1.20000
AFIX   0
O11   4    0.489943    0.692035    0.255627    31.00000    0.24082    0.20555 =
         0.26092    0.04005    0.01113    0.01114
C83   1    0.490417    0.744297    0.263973    31.00000    0.24082    0.20555 =
         0.26092    0.04005    0.01113    0.01114
AFIX  23
H83A  9    0.441465    0.752768    0.289165    31.00000   -1.20000
H83B  9    0.472238    0.762014    0.233916    31.00000   -1.20000
AFIX   0
C84   1    0.593097    0.760526    0.280332    31.00000    0.24082    0.20555 =
         0.26092    0.04005    0.01113    0.01114
AFIX  23
H84A  9    0.599674    0.794800    0.267782    31.00000   -1.20000
H84B  9    0.587045    0.763994    0.315829    31.00000   -1.20000
AFIX   0
O12   4    0.688270    0.739331    0.273494    31.00000    0.24082    0.20555 =
         0.26092    0.04005    0.01113    0.01114
C85   1    0.707600    0.704407    0.311068    31.00000    0.24082    0.20555 =
         0.26092    0.04005    0.01113    0.01114
AFIX 133
H85A  9    0.691802    0.719383    0.342404    31.00000   -1.50000
H85B  9    0.777320    0.695087    0.310415    31.00000   -1.50000
H85C  9    0.666961    0.674752    0.306204    31.00000   -1.50000
AFIX   0
PART 0
PART 4 -31.0
C81B  1    0.398538    0.619227    0.260528   -31.00000    0.24082    0.20555 =
         0.26092    0.04005    0.01113    0.01114
AFIX  23
H81C  9    0.329246    0.622076    0.249801   -31.00000   -1.20000
H81D  9    0.436279    0.602187    0.234800   -31.00000   -1.20000
AFIX   0
C82B  1    0.441377    0.671013    0.269203   -31.00000    0.24082    0.20555 =
         0.26092    0.04005    0.01113    0.01114
AFIX  23
H82C  9    0.408375    0.695382    0.247863   -31.00000   -1.20000
H82D  9    0.429852    0.681078    0.303149   -31.00000   -1.20000
AFIX   0
O11B  4    0.544424    0.670471    0.259420   -31.00000    0.24082    0.20555 =
         0.26092    0.04005    0.01113    0.01114
C83B  1    0.589950    0.712075    0.282168   -31.00000    0.24082    0.20555 =
         0.26092    0.04005    0.01113    0.01114
AFIX  23
H83C  9    0.660376    0.704857    0.288103   -31.00000   -1.20000
H83D  9    0.557978    0.718613    0.313685   -31.00000   -1.20000
AFIX   0
C84B  1    0.580312    0.757748    0.249613   -31.00000    0.24082    0.20555 =
         0.26092    0.04005    0.01113    0.01114
AFIX  23
H84C  9    0.636019    0.781083    0.253680   -31.00000   -1.20000
H84D  9    0.573378    0.748679    0.215105   -31.00000   -1.20000
AFIX   0
O12B  4    0.491040    0.776838    0.269375   -31.00000    0.24082    0.20555 =
         0.26092    0.04005    0.01113    0.01114
C85B  1    0.498753    0.829393    0.274531   -31.00000    0.24082    0.20555 =
         0.26092    0.04005    0.01113    0.01114
AFIX 133
H85D  9    0.536101    0.837185    0.303870   -31.00000   -1.50000
H85E  9    0.432720    0.843841    0.276909   -31.00000   -1.50000
H85F  9    0.532740    0.843269    0.246358   -31.00000   -1.50000
AFIX   0
PART 0
C86   1    0.271191    0.573924    0.582272    11.00000    0.07350    0.06886 =
         0.08919    0.02163   -0.00221   -0.00480
AFIX  23
H86A  9    0.330137    0.553040    0.587716    11.00000   -1.20000
H86B  9    0.212114    0.553191    0.587914    11.00000   -1.20000
AFIX   0
C87   1    0.271661    0.617868    0.617840    11.00000    0.09963    0.08086 =
         0.04852   -0.01269    0.00097   -0.00248
AFIX  23
H87A  9    0.222797    0.643287    0.608204    11.00000   -1.20000
H87B  9    0.256600    0.606554    0.651071    11.00000   -1.20000
AFIX   0
C88   1    0.374859    0.685251    0.635841    11.00000    0.12302    0.11058 =
         0.08577   -0.01941    0.01405   -0.01413
AFIX  23
H88A  9    0.351361    0.683811    0.669682    11.00000   -1.20000
H88B  9    0.331754    0.708300    0.617695    11.00000   -1.20000
AFIX   0
C89   1    0.480392    0.703883    0.634557    11.00000    0.13976    0.16629 =
         0.10931   -0.04291    0.01694   -0.07377
AFIX  23
H89A  9    0.525719    0.678256    0.647329    11.00000   -1.20000
H89B  9    0.500045    0.711905    0.600998    11.00000   -1.20000
AFIX   0
REM ############################################################################
EADP C90 > C92B
DFIX 1.426 0.002 O15 C90 O15 C90B O16 C91 O16B C91B O16 C92 O16B C92B
DFIX 1.53 0.002 C90 C91 C90B C91B
DANG 2.415 0.002 O15 C91 O15 C91B O16 C90 O16B C90B
DANG 2.329 0.002 C89 C90 C89 C90B C91 C92 C91B C92B
PART 5 41.0
C90   1    0.535425    0.785618    0.640210    41.00000    0.16572    0.10610 =
         0.19170   -0.01678    0.04706   -0.03101
AFIX  23
H90A  9    0.491276    0.802996    0.617310    41.00000   -1.20000
H90B  9    0.591878    0.772134    0.621776    41.00000   -1.20000
AFIX   0
C91   1    0.572365    0.822131    0.678522    41.00000    0.16572    0.10610 =
         0.19170   -0.01678    0.04706   -0.03101
AFIX  23
H91A  9    0.620166    0.805352    0.700036    41.00000   -1.20000
H91B  9    0.606100    0.850368    0.662682    41.00000   -1.20000
AFIX   0
O16   4    0.491080    0.839895    0.706172    41.00000    0.16572    0.10610 =
         0.19170   -0.01678    0.04706   -0.03101
C92   1    0.526437    0.864888    0.748143    41.00000    0.16572    0.10610 =
         0.19170   -0.01678    0.04706   -0.03101
AFIX 133
H92A  9    0.598562    0.864242    0.748352    41.00000   -1.50000
H92B  9    0.501451    0.848190    0.777125    41.00000   -1.50000
H92C  9    0.503606    0.899414    0.747804    41.00000   -1.50000
AFIX   0
PART 0
PART 6 -41.0
C90B  1    0.562270    0.778275    0.649723   -41.00000    0.16572    0.10610 =
         0.19170   -0.01678    0.04706   -0.03101
AFIX  23
H90C  9    0.558839    0.785430    0.614666   -41.00000   -1.20000
H90D  9    0.626120    0.761974    0.656491   -41.00000   -1.20000
AFIX   0
C91B  1    0.554799    0.826744    0.678359   -41.00000    0.16572    0.10610 =
         0.19170   -0.01678    0.04706   -0.03101
AFIX  23
H91C  9    0.605228    0.850499    0.666833   -41.00000   -1.20000
H91D  9    0.489151    0.841863    0.673372   -41.00000   -1.20000
AFIX   0
O16B  4    0.569418    0.816784    0.728467   -41.00000    0.16572    0.10610 =
         0.19170   -0.01678    0.04706   -0.03101
C92B  1    0.599153    0.861219    0.752419   -41.00000    0.16572    0.10610 =
         0.19170   -0.01678    0.04706   -0.03101
AFIX 133
H92D  9    0.640632    0.880964    0.730725   -41.00000   -1.50000
H92E  9    0.636480    0.852723    0.781578   -41.00000   -1.50000
H92F  9    0.540782    0.880507    0.761412   -41.00000   -1.50000
AFIX   0
PART 0
REM ###########################################################################
MOLE 2
O17   4    0.434131    0.390053    0.416778    11.00000    0.05304    0.09925 =
         0.05951    0.00311   -0.00534   -0.00292
O18   4    0.468618    0.417297    0.336411    11.00000    0.09156    0.08608 =
         0.09110    0.02119    0.00449   -0.01291
O19   4    0.440011    0.330874    0.352430    11.00000    0.08490    0.07432 =
         0.09372   -0.00843   -0.00121    0.01207
O20   4    0.306545    0.390570    0.362019    11.00000    0.07252    0.08824 =
         0.06997   -0.01307    0.00199   -0.01272
C93   1    0.259287    0.375794    0.315191    11.00000    0.09580    0.10034 =
         0.08611    0.01042   -0.02212   -0.00509
AFIX  13
H93   9    0.311581    0.369392    0.290530    11.00000   -1.20000
AFIX   0
C94   1    0.197364    0.416276    0.298983    11.00000    0.06153    0.17359 =
         0.04675   -0.00686   -0.00017    0.00791
AFIX  13
H94   9    0.151095    0.423494    0.326201    11.00000   -1.20000
AFIX   0
C95   1    0.133823    0.402225    0.256294    11.00000    0.09926    0.13826 =
         0.09188   -0.04214   -0.00227   -0.00434
AFIX  23
H95A  9    0.086688    0.429338    0.249324    11.00000   -1.20000
H95B  9    0.175643    0.397318    0.227384    11.00000   -1.20000
AFIX   0
C96   1    0.078956    0.355559    0.267154    11.00000    0.09211    0.12212 =
         0.06400    0.00040   -0.00703   -0.01449
AFIX  23
H96A  9    0.039272    0.346337    0.238518    11.00000   -1.20000
H96B  9    0.032884    0.361927    0.294176    11.00000   -1.20000
AFIX   0
C97   1    0.144000    0.312628    0.280341    11.00000    0.10186    0.12461 =
         0.08267    0.00929   -0.00393   -0.03116
AFIX  13
H97   9    0.191756    0.308386    0.253149    11.00000   -1.20000
AFIX   0
C98   1    0.202709    0.329779    0.323462    11.00000    0.09980    0.09076 =
         0.07439    0.00090   -0.00119   -0.01064
AFIX  23
H98A  9    0.157133    0.335203    0.350878    11.00000   -1.20000
H98B  9    0.248935    0.303044    0.332858    11.00000   -1.20000
AFIX   0
C99   1    0.257259    0.465351    0.290237    11.00000    0.08540    0.10100 =
         0.08012    0.00525    0.01945    0.00724
AFIX  13
H99   9    0.301170    0.470607    0.318789    11.00000   -1.20000
AFIX   0
C100  1    0.188112    0.513578    0.284907    11.00000    0.09607    0.10808 =
         0.09354   -0.00395    0.00011    0.02230
AFIX 133
H10A  9    0.221802    0.542514    0.298620    11.00000   -1.50000
H10B  9    0.126150    0.508018    0.302219    11.00000   -1.50000
H10C  9    0.174280    0.519567    0.250638    11.00000   -1.50000
AFIX   0
C101  1    0.323050    0.462777    0.244581    11.00000    0.15676    0.06408 =
         0.13952   -0.01101   -0.04983    0.00582
AFIX 133
H10D  9    0.363792    0.432767    0.245859    11.00000   -1.50000
H10E  9    0.365596    0.492142    0.243316    11.00000   -1.50000
H10F  9    0.281385    0.461792    0.215682    11.00000   -1.50000
AFIX   0
C102  1    0.096132    0.261263    0.289001    11.00000    0.18540    0.22590 =
         0.10004    0.02767   -0.01799   -0.14102
AFIX 133
H10G  9    0.138071    0.241575    0.310529    11.00000   -1.50000
H10H  9    0.088713    0.243943    0.258062    11.00000   -1.50000
H10I  9    0.031287    0.265730    0.303898    11.00000   -1.50000
AFIX   0
MOLE 3
EADP F1 F2 F3 F4 F1B F2B F3B F4B
EADP B1 B1B
SADI 0.002 B1 F1 B1 F2 B1 F3 B1 F4 B1B F1B B1B F2B B1B F3B B1B F4B
SADI 0.002 F1 F2 F1 F3 F1 F4 F2 F3 F2 F4 F3 F4 =
           F1B F2B F1B F3B F1B F4B F2B F3B F2B F4B F3B F4B
PART 7 51.0
F1    5    0.381306    0.418122    0.586019    51.00000    0.17753    0.12535 =
         0.15769   -0.03437   -0.04712    0.02831
F2    5    0.220802    0.409615    0.593823    51.00000    0.17753    0.12535 =
         0.15769   -0.03437   -0.04712    0.02831
F3    5    0.297145    0.471528    0.630043    51.00000    0.17753    0.12535 =
         0.15769   -0.03437   -0.04712    0.02831
F4    5    0.318358    0.394850    0.655843    51.00000    0.17753    0.12535 =
         0.15769   -0.03437   -0.04712    0.02831
B1    2    0.304379    0.423525    0.616442    51.00000    0.05837    0.04942 =
         0.05045   -0.01461   -0.03547    0.01900
PART 0
PART 8 -51.0
F1B   5    0.456999    0.433839    0.606093   -51.00000    0.17753    0.12535 =
         0.15769   -0.03437   -0.04712    0.02831
F2B   5    0.309412    0.419510    0.576121   -51.00000    0.17753    0.12535 =
         0.15769   -0.03437   -0.04712    0.02831
F3B   5    0.326159    0.466689    0.640681   -51.00000    0.17753    0.12535 =
         0.15769   -0.03437   -0.04712    0.02831
F4B   5    0.352755    0.386095    0.645647   -51.00000    0.17753    0.12535 =
         0.15769   -0.03437   -0.04712    0.02831
B1B   2    0.361331    0.426535    0.617144   -51.00000    0.05837    0.04942 =
         0.05045   -0.01461   -0.03547    0.01900
PART 0
MOLE 4
EADP O21 > C116
DFIX 1.50 0.002 C103 C104 C104 C105 C105 C106 C113 C114 C114 C115 C115 C116
DFIX 1.48 0.002 O21 C103 O21 C106 O22 C113 O22 C116
SADI 0.002 O21 C104 O21 C105 O22 C114 O22 C115
SADI 0.002 C103 C105 C104 C106 C113 C115 C114 C116
PART 9 61.0
O21   4    0.426405    0.020636    0.420287    61.00000    0.15300    0.15402 =
         0.17587    0.03492    0.00303    0.00201
C103  1    0.359702    0.002873    0.381706    61.00000    0.15300    0.15402 =
         0.17587    0.03492    0.00303    0.00201
AFIX  23
H10J  9    0.306839    0.026920    0.374026    61.00000   -1.20000
H10K  9    0.331180   -0.030176    0.388773    61.00000   -1.20000
AFIX   0
C104  1    0.438331    0.001041    0.343703    61.00000    0.15300    0.15402 =
         0.17587    0.03492    0.00303    0.00201
AFIX  23
H10L  9    0.456186   -0.033984    0.337237    61.00000   -1.20000
H10M  9    0.412795    0.015595    0.313331    61.00000   -1.20000
AFIX   0
C105  1    0.528153    0.029072    0.359447    61.00000    0.15300    0.15402 =
         0.17587    0.03492    0.00303    0.00201
AFIX  23
H10N  9    0.528421    0.062267    0.344057    61.00000   -1.20000
H10O  9    0.587803    0.011077    0.348683    61.00000   -1.20000
AFIX   0
C106  1    0.530615    0.034941    0.413325    61.00000    0.15300    0.15402 =
         0.17587    0.03492    0.00303    0.00201
AFIX  23
H10P  9    0.577041    0.011735    0.429159    61.00000   -1.20000
H10Q  9    0.544352    0.069486    0.423562    61.00000   -1.20000
AFIX   0
PART 0
PART 10 -61.0
O22   4    0.446881   -0.012196    0.428525   -61.00000    0.15300    0.15402 =
         0.17587    0.03492    0.00303    0.00201
C113  1    0.367800    0.005624    0.396051   -61.00000    0.15300    0.15402 =
         0.17587    0.03492    0.00303    0.00201
AFIX  23
H11A  9    0.321863    0.028840    0.412212   -61.00000   -1.20000
H11B  9    0.330854   -0.021815    0.380614   -61.00000   -1.20000
AFIX   0
C114  1    0.436765    0.031281    0.361835   -61.00000    0.15300    0.15402 =
         0.17587    0.03492    0.00303    0.00201
AFIX  23
H11C  9    0.416796    0.024088    0.328144   -61.00000   -1.20000
H11D  9    0.432766    0.067636    0.366825   -61.00000   -1.20000
AFIX   0
C115  1    0.540763    0.014306    0.369580   -61.00000    0.15300    0.15402 =
         0.17587    0.03492    0.00303    0.00201
AFIX  23
H11E  9    0.557766   -0.011129    0.345126   -61.00000   -1.20000
H11F  9    0.586077    0.042773    0.365349   -61.00000   -1.20000
AFIX   0
C116  1    0.553702   -0.007098    0.419235   -61.00000    0.15300    0.15402 =
         0.17587    0.03492    0.00303    0.00201
AFIX  23
H11G  9    0.588501   -0.039404    0.419013   -61.00000   -1.20000
H11H  9    0.586317    0.016177    0.441837   -61.00000   -1.20000
PART 0
AFIX   0
HKLF 4

REM  Fc-tri2
REM R1 =  0.0877 for    8740 Fo > 4sig(Fo)  and  0.1854 for all   18060 data
REM   1218 parameters refined using    203 restraints

END

WGHT      0.1586      0.0000

REM Highest difference peak  1.455,  deepest hole -0.900,  1-sigma level  0.123
Q1    1   0.2799  0.4031  0.5186  11.00000  0.05    1.45
Q2    1   0.5141  0.4040  0.5415  11.00000  0.05    1.23
Q3    1   0.4435  0.5803  0.2035  11.00000  0.05    1.15
Q4    1   0.5120  0.4033  0.4604  11.00000  0.05    0.99
Q5    1   0.3716  0.8372  0.4579  11.00000  0.05    0.90
Q6    1   0.2349  0.3999  0.6577  11.00000  0.05    0.80
Q7    1   0.2353  0.4192  0.5743  11.00000  0.05    0.77
Q8    1   0.2779  0.3967  0.4338  11.00000  0.05    0.72
Q9    1   0.5128  0.4373  0.5022  11.00000  0.05    0.69
Q10   1   0.3062  0.1625  0.7466  11.00000  0.05    0.64
;
_shelx_res_checksum   52281

_shelx_hkl_file
;
 -16   7   2 -124.49  246.78
 -16   7   2  223.95  246.34
  16   7  -2 -136.11  243.45
 -16  -7  -2 -138.64  242.77
 -16   7   1  193.69  298.03
  16   7  -1  -96.71  123.60
 -16   7   1 1479.90  492.67
  16   7  -1  -87.36  164.52
 -16  -7  -1   88.41  249.81
 -16  -7   0  -37.41  162.37
 -16   7   0 -101.53  164.06
 -16   7   0  467.34  164.71
 -16   6   4 -270.33  215.87
 -16   6   4 -119.26  215.95
  16   6  -4   62.94  213.76
 -16  -6  -4 -270.89  214.36
 -16   6   4   -3.83  216.09
 -16  -6  -4   32.68  212.83
 -16  -6  -3 -191.33  203.39
  16   6  -3    3.99  202.95
 -16   6   3  -36.70  205.33
 -16   6   3  146.06  205.40
 -16  -6  -3  130.19  202.30
 -16   6   3  302.99  205.32
 -16   6   3  -72.56  205.79
 -16  -6  -2  169.40  247.40
 -16   6   2  347.69  372.73
 -16   6   2  236.11  331.86
  16   6  -2  -58.17  171.28
 -16  -6  -2  316.15  188.46
 -16   6   2   92.19  136.50
 -16  -6  -1  -35.03  263.49
  16   6  -1  258.18  129.70
  16   6  -1  146.37  173.76
 -16   6   1  -66.33  312.23
 -16   6   1  173.93  309.75
 -16   6   0   19.44  269.56
 -16  -6   0  130.48  265.10
 -16   6   0  250.36  288.19
 -16   5   5   38.67  210.31
 -16   5   5 -107.75  210.97
 -16  -5  -5  -52.88  207.87
 -16   5   5   39.96  210.42
  16   5  -5   20.31  208.77
 -16  -5  -5 -112.67  209.84
  16   5  -4   40.87  159.01
 -16   5   4  -55.59  151.79
 -16  -5  -4  301.95  234.79
 -16   5   4  159.60  295.09
 -16   5   4  313.75  356.00
 -16  -5  -4   46.06  202.08
 -16   5   3  209.46  304.35
 -16   5   3  -31.61  142.54
 -16  -5  -3  118.84  224.64
 -16   5   3  -25.71  159.61
 -16   5   3  -35.00  287.74
 -16  -5  -3  -46.18  226.39
  16   5  -3   32.24  184.41
 -16   5   2  407.08  302.43
 -16  -5  -2 -197.63  192.84
  16   5  -2   67.05  188.45
 -16   5   2  -80.08  288.42
 -16  -5  -2   66.90  256.61
 -16   5   2   38.13  141.37
 -16   5   1 -182.74  302.90
 -16  -5  -1  130.18  288.01
 -16   5   1  101.90  303.20
  16   5  -1  230.97  173.26
 -16  -5   0   38.63  126.15
 -16   5   0  -38.64  127.56
 -16   5   0 -270.10  127.14
  16   4  -6   28.70  183.03
 -16   4   6 -113.65  184.82
 -16  -4  -6 -208.82  184.44
 -16   4   6   -9.48  183.94
 -16  -4  -6   92.82  182.32
 -16   4   5  112.56  296.32
 -16  -4  -5  110.44  203.29
  16   4  -5  162.77  190.61
 -16  -4  -5   65.16  193.76
 -16   4   5  232.92  340.48
 -16   4   4 -159.27  260.36
 -16  -4  -4  373.88  204.20
  16   4  -4  138.39  162.57
 -16   4   4   60.46  137.23
 -16   4   4  606.53  304.46
 -16  -4  -4  127.51  253.24
 -16   4   3  441.89  154.63
 -16   4   3  293.71  305.02
 -16   4   3  533.92  343.84
 -16  -4  -3  363.91  227.30
  16   4  -3  -28.69  187.14
 -16  -4  -3  243.53  241.88
 -16   4   3  298.18  156.31
 -16  -4  -2  347.78  282.04
 -16   4   2  308.76  155.96
 -16  -4  -2  378.41  225.35
 -16   4   2  243.50  297.09
  16   4  -2  333.78  196.36
 -16   4   2 -179.68  317.79
 -16   4   1 -124.85  281.69
 -16  -4  -1  170.27  278.45
 -16   4   1  -92.98  281.21
  16   4  -1 -127.13  278.06
 -16  -4   0  175.52  286.80
 -16   4   0  466.65  164.25
 -16   4   0  396.20  310.80
 -16   4   0  515.34  273.58
 -16  -3  -7   77.86  183.50
 -16  -3  -7  -54.68  185.92
  16   3  -7  241.06  184.10
 -16   3   7 -269.10  185.72
 -16   3   6  267.74  353.57
 -16  -3  -6 -114.00  177.00
  16   3  -6   15.79  183.05
 -16   3   6  298.03  296.65
 -16  -3  -6  135.75  168.24
 -16  -3  -5   42.38  215.46
 -16   3   5  378.56  236.36
  16   3  -5  114.43  159.80
 -16  -3  -5  203.93  193.84
 -16   3   5 -204.60  296.42
 -16   3   4  336.38  258.59
 -16  -3  -4  460.82  234.78
 -16   3   4 -252.70  309.45
 -16  -3  -4  196.94  197.63
  16   3  -4  306.49  178.33
 -16   3   3  162.16  160.78
 -16   3   3 -121.51  277.73
 -16  -3  -3  470.85  232.84
  16   3  -3  304.30  198.91
 -16   3   3 -147.86  268.93
 -16  -3  -3  302.39  202.55
 -16   3   2  136.47  286.75
 -16   3   2  106.67  182.14
  16   3  -2  204.13  179.00
 -16   3   2  128.84  157.33
 -16   3   2   46.01  298.66
 -16  -3  -2   -9.62  259.73
 -16  -3  -2  570.52  208.08
 -16   3   1  678.63  280.58
 -16  -3  -1   98.36  204.59
 -16   3   1  285.43  187.77
 -16   3   1  625.99  285.36
 -16  -3  -1  126.13  270.89
 -16   3   0  118.48  184.69
 -16   3   0  160.06  152.87
 -16   3   0  316.12  275.77
 -16   3   0  189.09  275.02
 -16  -3   0  632.08  360.53
 -16  -2  -7  304.98  156.70
 -16   2   7   49.16  323.50
 -16  -2  -7   61.42  204.20
 -16   2   7  333.80  265.20
  16   2  -7  103.54  171.25
 -16  -2  -6  359.83  197.42
  16   2  -6  319.59  178.15
 -16   2   6  260.65  270.80
 -16  -2  -6  142.51  168.84
 -16   2   6   97.83  277.17
 -16  -2  -5   49.73  185.31
 -16   2   5  335.53  304.22
  16   2  -5   42.77  169.57
 -16  -2  -5  128.05  198.83
 -16  -2  -4  134.18  232.63
 -16  -2  -4   49.46  194.38
 -16   2   4   57.11  271.08
  16   2  -4  167.09  169.58
 -16   2   4  236.80  275.89
  16   2  -3  252.66  165.16
 -16  -2  -3  340.31  201.15
 -16   2   3    5.61  260.16
 -16  -2  -3  229.24  262.76
 -16   2   3 -116.42  289.32
 -16   2   2  227.83  316.45
 -16   2   2  -82.24  149.56
 -16   2   2 -109.85  226.77
 -16  -2  -2  298.12  196.73
 -16  -2  -2 -109.83  283.94
  16   2  -2 -164.51  174.19
 -16   2   2  163.65  195.28
 -16  -2  -1  -33.04  160.93
 -16   2   1   16.77  141.95
 -16   2   1  210.21  193.19
 -16  -2  -1   31.22  258.90
 -16   2   1   62.44  269.71
 -16  -2  -1  271.29  204.84
 -16  -2   0  -59.02  151.84
 -16  -2   0  114.34  271.11
 -16   2   0  192.23  181.01
 -16   2   0  414.09  296.35
 -16   2   0 -212.04  235.39
 -16  -2   0    4.72  233.76
 -16   2   0   56.56  139.64
 -16   1   7  216.93  292.09
 -16  -1  -7  189.22  180.84
  16   1  -7   77.31  166.04
 -16  -1  -7  -56.15  170.93
 -16   1   7  313.82  296.17
 -16  -1  -6  260.83  183.63
  16   1  -6 -176.94  150.34
 -16  -1  -6  277.23  192.22
 -16   1   6  -13.95  258.10
 -16   1   6  173.50  304.41
  16   1  -5  124.97  149.24
 -16   1   5  190.33  256.81
 -16   1   5  220.18  283.67
 -16  -1  -5  462.21  191.91
 -16  -1  -5   91.38  181.27
  16   1  -4  105.82  156.71
 -16   1   4   14.33  232.48
 -16   1   4   73.49  305.21
 -16  -1  -4  160.37  224.37
 -16  -1  -4  373.40  199.59
 -16   1   3  185.33  245.85
 -16  -1  -3  114.66  199.52
  16   1  -3  -29.45  149.09
 -16   1   3 -169.15  283.38
 -16  -1  -3   43.65  252.38
 -16  -1  -2  579.43  260.26
 -16   1   2  423.73  205.07
 -16  -1  -2  147.84  161.77
 -16  -1  -2  275.32  207.73
 -16  -1  -2  351.53  204.30
 -16   1   2  363.80  282.06
 -16   1   2  128.72  140.93
 -16  -1  -1   82.24  196.43
 -16  -1  -1  160.42  264.85
 -16  -1  -1   68.90  216.16
 -16   1   1 -124.06  202.91
 -16   1   1  261.95  236.71
 -16  -1  -1    7.13  148.54
 -16   1   1   20.37  146.50
 -16   1   1 -227.14  286.04
 -16  -1   0  138.83  196.59
 -16   1   0  130.60  197.00
 -16  -1   0 -164.86  196.89
 -16   1   0 -127.37  197.36
 -16   1   0  -62.93  197.22
 -16   1   0 -147.63  199.21
 -16  -1   0  128.90  197.14
 -16  -1   0  -72.08  200.29
 -16   0  -7  257.80  179.28
  16   0  -7  249.97  147.12
 -16   0  -6  878.73  184.49
  16   0  -6 1005.77  196.74
  16   0  -5  887.53  175.42
 -16   0  -5 1139.95  229.03
 -16   0  -5  963.14  216.38
 -16   0  -4  466.53  238.45
 -16   0  -4  -69.09  235.88
  16   0  -4  279.40  151.62
 -16   0  -4  200.18  218.55
 -16   0  -3 1553.45  241.45
 -16   0  -3  951.62  211.25
 -16   0  -3 1182.80  277.19
 -16   0  -3  942.19  232.89
 -16   0  -2  407.91  252.31
 -16   0  -2  178.47  238.57
 -16   0  -2  209.20  173.38
 -16   0  -2  453.55  217.39
 -16   0  -1  745.19  164.26
 -16   0  -1  788.71  296.92
 -16   0  -1 1057.08  231.12
 -16   0  -1  648.32  223.93
 -16   0   0 2282.34  315.39
 -16   0   0 1554.02  334.87
 -16   0   0 1487.00  187.67
 -16   0   0 1184.86  253.89
 -15  13   3 -176.22  315.05
  15 -13   3  -69.38  311.84
 -15 -13  -2  -27.81  250.56
 -15  13   2 -410.09  256.75
  15 -13   2 -125.52  254.21
  15 -13   1   37.37  250.96
  15  13  -1  -50.36  246.57
 -15  13   1 -297.46  253.43
 -15 -13  -1  193.33  247.42
 -15  13   0 -269.05  305.54
 -15 -13   0  384.19  248.71
 -15 -12  -6   87.48  214.75
  15  12  -6   55.32  200.26
 -15  12   6   74.10  327.01
  15 -12   6 -211.88  235.31
 -15  12   5  -73.77  232.12
 -15 -12  -5 -162.79  227.45
  15 -12   5 -171.69  231.49
  15  12  -5  -21.63  229.92
  15  12  -4   20.71  194.19
 -15  12   4  -10.92  298.46
 -15 -12  -4  337.66  219.85
 -15  12   3  169.90  346.41
  15 -12   3   93.84  152.16
 -15 -12  -3  234.00  271.27
 -15 -12  -2   70.36  238.46
  15 -12   2  172.18  196.34
 -15  12   2   66.21  335.04
  15  12  -2  -91.13  166.75
  15  12  -1  -51.40  129.89
 -15 -12  -1  -46.41  226.51
  15 -12   1   91.94  169.59
 -15  12   1  105.03  301.97
 -15 -12   0 -356.05  141.77
 -15  12   0 -102.01  144.95
  15  11  -7  -76.41  212.05
 -15  11   7 -271.72  213.36
 -15  11   7   42.57  214.54
  15 -11   7  -33.10  213.16
 -15 -11  -7  -53.75  210.58
  15 -11   6    1.15  228.24
 -15  11   6 -378.06  228.52
  15  11  -6   22.73  226.75
 -15  11   6  -28.88  229.53
 -15 -11  -6    3.10  224.74
  15 -11   5  277.17  238.26
 -15 -11  -5    5.71  244.43
 -15  11   5  -90.43  305.59
 -15  11   4   74.73  288.08
 -15 -11  -4  220.04  213.65
 -15  11   3  255.18  319.84
  15  11  -3  -38.91  172.81
 -15 -11  -3  196.17  205.44
  15 -11   2   66.70  167.54
 -15  11   2   54.81  310.02
 -15 -11  -2   72.18  215.90
 -15  11   1 -113.57  202.27
 -15  11   1   32.80  204.32
  15  11  -1  -34.44  199.53
 -15 -11  -1  197.33  199.82
  15 -11   1   43.88  202.68
 -15  11   0 -178.60  130.84
 -15  11   0 -145.16  132.49
 -15 -11   0 -368.52  129.71
 -15  10   9   38.10  295.27
  15 -10   9  231.66  239.12
  15  10  -9    6.75  208.96
  15 -10   8  157.71  250.62
  15  10  -8  148.05  184.62
 -15 -10  -8   69.58  205.25
  15 -10   7  115.31  241.64
  15  10  -7  188.00  178.13
 -15 -10  -7    7.91  215.40
 -15  10   7  -72.31  306.82
  15 -10   6    9.20  243.29
 -15  10   6  176.91  152.78
 -15  10   6  335.82  275.89
 -15 -10  -6 -183.18  220.55
  15  10  -6   85.22  173.98
 -15 -10  -5   75.00  240.26
 -15  10   5  179.97  309.45
 -15  10   5   70.69  124.62
  15 -10   5  100.03  231.82
  15  10  -5  303.83  184.47
 -15 -10  -4  537.66  217.07
 -15  10   4   57.53  285.50
  15  10  -4  265.42  182.08
 -15 -10  -3  -67.21  228.70
 -15  10   3 -148.04  233.59
  15  10  -3   63.06  230.83
  15  10  -2  -21.49  160.81
 -15  10   2   64.65  299.56
 -15 -10  -2  226.65  222.94
 -15  10   1  155.56  240.54
  15 -10   1  -35.36  238.84
  15  10  -1 -129.24  237.16
 -15 -10  -1   50.60  235.55
 -15  10   0  -20.07  264.01
 -15 -10   0  -10.81  231.22
 -15   9  10  -43.11  159.78
  15   9 -10  -24.28  160.24
  15  -9  10   10.36  160.73
 -15   9   9  -82.64  175.81
  15  -9   9  -79.52  176.63
  15   9  -9  120.02  175.93
 -15   9   8  250.71  307.40
  15   9  -8  195.60  194.60
  15  -9   8  -49.17  220.61
 -15   9   7    5.34  286.34
  15   9  -7  119.77  193.05
 -15  -9  -7 -156.75  207.64
  15  -9   7  187.73  231.33
 -15   9   6  233.13  316.59
 -15   9   6   58.33  149.19
  15   9  -6 -173.14  190.41
 -15  -9  -6   57.98  216.62
  15  -9   6   58.54  196.09
 -15  -9  -5  204.13  215.66
 -15   9   5  -22.77  318.30
  15   9  -5   -5.42  174.31
 -15   9   5   27.78  121.42
 -15   9   4 -322.08  222.59
 -15  -9  -4  -77.18  218.53
  15   9  -4   26.17  220.40
  15   9  -3  -64.78  116.32
  15   9  -3   71.08  162.88
 -15  -9  -3  433.21  226.90
 -15   9   3 -178.93  284.79
 -15   9   2  121.29  278.29
  15   9  -2  -64.01  122.05
  15   9  -2  220.86  160.14
 -15  -9  -2 -118.47  208.05
 -15   9   1  177.08  161.64
  15   9  -1  225.12  180.64
 -15  -9  -1  -37.05  217.53
 -15   9   1  273.63  309.25
 -15  -9   0  252.41  131.69
 -15   9   0 -219.64  134.10
  15  -8  11   -3.42  204.96
 -15   8  11  221.89  277.97
  15   8 -11  -71.34  176.94
  15  -8  10  112.22  211.22
  15   8 -10  164.33  190.58
 -15   8  10  259.71  337.59
  15  -8   9 -210.69  195.81
  15   8  -9  137.67  194.98
 -15   8   9   74.53  194.49
  15  -8   8   80.54  231.89
 -15  -8  -8  179.09  213.52
 -15   8   8  264.52  282.34
  15   8  -8  114.28  186.48
 -15   8   7  -71.84  286.51
  15   8  -7 -131.93  199.52
 -15  -8  -7  211.77  206.81
  15  -8   7  179.02  206.89
 -15  -8  -6  280.14  227.97
  15  -8   6  103.16  197.89
 -15   8   6   58.21  288.11
  15   8  -6  217.78  167.03
 -15   8   6   57.68  148.89
  15   8  -5   88.88  185.07
 -15  -8  -5  286.11  271.76
 -15   8   5 -209.04  302.26
 -15   8   4   94.62  274.41
 -15  -8  -4  -84.52  227.01
  15   8  -4   77.76  173.45
  15   8  -3  -85.29  239.13
 -15   8   3   38.81  241.82
 -15  -8  -3  -28.52  237.58
  15   8  -3  -33.85  239.39
  15   8  -2  -66.13  166.84
 -15  -8  -2  206.31  211.26
 -15   8   2  -24.70  274.98
  15   8  -2   77.95  122.60
 -15  -8  -1  116.49  224.19
  15   8  -1   71.65  124.72
 -15   8   1  -41.26  174.66
  15   8  -1  162.00  176.61
 -15   8   1  417.03  267.49
 -15   8   0  360.79  309.84
 -15  -8   0  417.95  252.52
  15   7 -11   10.83  170.76
  15  -7  11  105.19  204.95
  15  -7  10   18.47  180.14
  15   7 -10 -161.08  179.60
 -15   7  10  -34.69  178.40
  15  -7   9  -95.26  204.19
 -15   7   9  968.47  395.86
  15   7  -9  241.28  178.19
  15  -7   8  -63.29  197.51
 -15   7   8  176.24  228.82
  15   7  -8   46.20  177.58
  15   7  -7  101.23  189.78
  15  -7   7   68.28  195.59
 -15  -7  -7   91.42  216.15
 -15   7   7  259.48  294.23
 -15  -7  -7  125.71  190.57
 -15  -7  -6  199.63  228.06
 -15   7   6   47.61  268.19
  15   7  -6  212.35  183.01
 -15   7   6   45.77  156.53
  15   7  -5 -151.04  192.55
 -15  -7  -5  159.77  232.05
 -15  -7  -5  123.38  199.48
 -15   7   5   -3.05  305.84
  15   7  -4 -294.00  194.48
 -15  -7  -4 -202.13  193.28
 -15   7   4  190.74  196.19
 -15  -7  -4  188.53  194.48
  15   7  -3   93.66  114.57
 -15  -7  -3    0.31  215.77
 -15   7   3  369.03  137.61
 -15   7   3  399.96  303.33
  15   7  -3   86.94  170.88
 -15   7   2  274.68  268.58
  15   7  -2  196.52  182.62
 -15  -7  -2   46.28  234.02
  15   7  -2   79.72  116.17
  15   7  -1   96.98  121.57
 -15   7   1   24.37  303.40
  15   7  -1  157.17  169.46
 -15  -7  -1  143.02  237.82
 -15   7   0  609.30  285.47
 -15  -7   0  299.60  208.87
 -15   7   0  -27.64  188.61
 -15   7   0    3.38  299.69
  15   6 -12  -53.28  201.69
  15  -6  12  165.41  188.45
  15   6 -11   21.22  179.96
  15  -6  11  315.37  196.10
  15   6 -10   20.39  199.49
  15  -6  10  124.56  224.98
 -15  -6  -9  147.94  201.69
 -15   6   9  -38.44  250.73
  15   6  -9   59.73  180.56
  15  -6   9  417.73  227.48
  15   6  -8 -300.48  185.39
 -15   6   8  219.20  184.95
 -15  -6  -8 -136.08  185.96
 -15  -6  -8 -126.64  184.68
  15  -6   8  385.90  186.55
  15   6  -7  109.13  173.43
 -15  -6  -7 -220.07  172.57
 -15  -6  -7 -243.63  173.91
 -15   6   7    5.44  173.53
 -15   6   6  129.45  276.87
  15   6  -6  228.65  186.83
 -15  -6  -6   39.77  206.20
 -15  -6  -6 -156.28  216.82
 -15   6   5  282.55  126.44
 -15  -6  -5  345.24  183.19
 -15   6   5  -47.11  310.27
 -15  -6  -5  578.20  239.13
  15   6  -5 -220.08  176.36
 -15  -6  -4   18.93  204.09
  15   6  -4 -147.59  164.25
 -15   6   4   17.78  300.73
 -15  -6  -4  272.54  198.96
 -15  -6  -3   33.84  183.27
  15   6  -3    4.58  183.05
 -15  -6  -3  -27.96  182.38
 -15   6   3 -226.16  184.95
 -15   6   3   86.90  185.04
  15   6  -2   38.39  119.05
 -15   6   2 -357.94  281.48
 -15  -6  -2  363.87  251.21
  15   6  -2  110.83  172.62
 -15  -6  -1  127.15  235.38
  15   6  -1  206.06  137.69
 -15   6   1   32.01  299.61
  15   6  -1  247.93  174.09
 -15   6   1   83.76  303.31
 -15   6   0 -109.84  168.62
 -15   6   0  189.03  167.49
 -15  -6   0 -326.97  167.03
 -15   6   0   72.71  169.06
  15  -5  12   -0.64  186.01
  15   5 -12  390.23  217.68
  15   5 -11  -72.36  203.43
  15  -5  11   98.29  181.64
  15  -5  10   18.40  210.81
 -15  -5 -10  376.69  202.01
  15   5 -10  260.59  207.06
 -15  -5  -9  186.73  208.57
  15  -5   9  -53.07  170.62
  15   5  -9  -51.84  174.49
  15  -5   8  415.34  190.08
  15   5  -8  197.67  201.07
 -15  -5  -8  320.85  185.68
 -15   5   7   17.82  244.08
 -15  -5  -7  -15.67  219.46
  15   5  -7   49.88  184.25
 -15   5   6  234.18  290.69
 -15  -5  -6  244.43  243.33
 -15  -5  -6  -45.84  197.78
  15   5  -6  187.39  180.44
 -15   5   5  -15.03  117.94
 -15   5   5   25.57  278.07
 -15  -5  -5  176.24  219.49
 -15  -5  -5  118.98  192.71
  15   5  -5  129.31  171.57
  15   5  -4  149.10  192.94
 -15  -5  -4  198.50  253.23
 -15   5   4  404.37  264.86
 -15   5   4  139.88  130.79
 -15  -5  -4    7.41  204.04
 -15   5   3 -150.19  194.67
  15   5  -3    3.26  192.47
 -15   5   3  101.71  194.45
 -15   5   3  -44.52  194.38
 -15   5   3  131.41  194.54
 -15  -5  -3   21.40  192.94
 -15  -5  -3 -145.02  191.98
  15   5  -2   56.58  177.00
 -15   5   2  176.53  290.25
 -15   5   2   63.29  274.59
 -15   5   2   17.91  145.85
 -15  -5  -2  208.59  243.56
 -15   5   1  266.20  286.55
  15   5  -1  129.72  182.99
 -15  -5  -1  349.01  224.28
 -15   5   1  561.47  282.93
  15   5  -1  196.12  130.67
 -15   5   0  141.31  296.89
 -15  -5   0    4.90  260.83
 -15   5   0   62.57  172.80
 -15   5   0  215.01  283.34
  15   4 -13  210.77  222.46
  15  -4  12 -121.53  187.38
  15   4 -12  163.81  193.36
  15  -4  11  145.95  185.18
  15   4 -11  190.71  178.31
  15   4 -10  300.73  201.63
  15  -4  10  298.62  190.76
 -15  -4  -9  674.05  201.41
  15  -4   9  253.69  178.56
  15   4  -9  681.58  196.86
  15   4  -8   72.88  187.73
 -15  -4  -8  286.72  197.14
 -15  -4  -7  378.10  190.27
 -15  -4  -7  424.78  221.24
  15   4  -7  208.08  187.33
 -15  -4  -6  -38.74  175.31
 -15   4   6  128.70  260.67
 -15  -4  -6  106.81  233.18
  15   4  -6  154.86  190.92
 -15   4   5  193.20  127.81
  15   4  -5  149.18  178.45
 -15  -4  -5 -106.41  226.57
 -15   4   5 -367.67  237.56
 -15   4   5   47.68  262.91
 -15  -4  -5  101.59  183.97
 -15  -4  -4 -106.75  234.37
 -15  -4  -4  -51.50  197.37
  15   4  -4   29.23  178.63
 -15   4   4  152.47  127.61
 -15   4   4  219.10  281.25
 -15  -4  -3  161.03  171.95
 -15   4   3  488.52  132.96
 -15   4   3  644.01  294.86
 -15  -4  -3  380.71  244.03
 -15   4   3  475.22  313.73
  15   4  -3  253.30  176.96
 -15   4   2  -20.64  277.41
 -15   4   2  -86.97  282.23
 -15   4   2   35.96  139.20
 -15  -4  -2  -18.39  245.21
  15   4  -2   53.86  170.55
 -15   4   2  125.95  174.51
 -15   4   1  -18.43  176.97
 -15   4   1   48.96  176.89
 -15   4   1   36.34  175.89
  15   4  -1  -92.04  174.91
 -15   4   1  -48.04  176.91
 -15  -4  -1  -22.25  179.51
 -15  -4  -1  -27.74  175.17
 -15  -4   0  -59.92  170.57
 -15   4   0 -222.48  171.71
 -15  -4   0  109.52  173.97
 -15   4   0  106.31  172.10
 -15   4   0  -68.01  170.80
  15   3 -13 -100.70  184.06
  15  -3  13   97.95  183.38
  15  -3  12  176.05  180.38
  15   3 -12  146.56  180.59
  15   3 -11  291.57  187.37
  15  -3  11  119.66  177.76
  15   3 -10  166.28  188.94
  15   3  -9  266.27  184.69
  15   3  -8   -3.24  177.80
 -15  -3  -8  261.41  183.37
 -15  -3  -7   15.53  179.74
  15   3  -7  204.69  183.95
 -15  -3  -7  239.76  173.75
 -15   3   7  463.12  279.84
  15   3  -6  193.81  155.39
 -15   3   6  355.74  291.41
 -15  -3  -6   29.75  177.62
 -15  -3  -6   71.25  201.69
 -15   3   5   79.45  297.46
 -15  -3  -5   87.30  253.79
 -15   3   5  260.01  144.27
  15   3  -5  196.71  181.93
 -15  -3  -5  301.15  174.98
 -15   3   4  -59.77  172.30
 -15   3   4  226.93  172.10
  15   3  -4  -98.62  170.07
 -15  -3  -4  -49.56  171.17
 -15  -3  -4 -190.20  169.70
 -15   3   3   45.94  137.58
 -15  -3  -3  350.21  184.30
 -15   3   3   -9.36  301.09
 -15  -3  -3    7.45  175.76
 -15  -3  -3  184.17  270.27
  15   3  -3   46.85  175.63
  15   3  -2  -29.09  163.34
 -15   3   2  123.92  271.51
 -15   3   2  -35.52  175.44
 -15  -3  -2   64.74  224.37
 -15  -3  -2   99.54  174.18
 -15   3   2  195.41  267.86
 -15  -3  -2   17.22  176.27
  15   3  -1 -157.66  159.76
 -15   3   1  120.19  161.60
 -15  -3  -1 -119.77  160.08
 -15   3   1 -339.95  161.45
 -15   3   1   21.16  161.29
 -15  -3  -1  249.58  163.96
 -15  -3   0  -52.17  162.23
 -15   3   0  191.01  163.57
 -15   3   0  326.25  163.07
 -15  -3   0  -15.56  165.46
  15   2 -13  231.83  183.60
  15  -2  13  626.22  187.12
  15  -2  13  238.33  177.61
  15  -2  12 -165.60  195.11
  15  -2  12  136.43  215.87
  15   2 -12  126.40  192.78
  15  -2  11  244.48  176.10
  15   2 -11  200.75  177.82
  15  -2  11  548.17  192.63
 -15   2  10    2.98  308.65
  15   2 -10  256.53  184.88
 -15   2   9  204.31  354.81
  15   2  -9   70.29  182.87
  15   2  -8 -129.27  171.08
 -15  -2  -8  107.21  170.75
 -15   2   8   16.34  172.11
 -15  -2  -7  110.46  176.87
 -15   2   7  -94.62  335.31
  15   2  -7   63.51  170.34
 -15  -2  -6  126.12  160.09
  15   2  -6 -137.22  160.57
 -15  -2  -6  -41.82  162.15
 -15   2   6 -183.60  162.19
  15   2  -5 -203.64  159.46
 -15   2   5   38.11  135.59
 -15   2   5  172.28  308.76
 -15  -2  -5   69.01  193.96
 -15  -2  -5  124.86  274.25
 -15  -2  -5   38.94  180.28
 -15   2   4   46.64  168.27
  15   2  -4 -107.91  166.23
 -15  -2  -4  -35.86  165.92
 -15  -2  -4 -112.09  170.96
 -15  -2  -4  101.21  167.54
 -15   2   4  -49.36  168.22
 -15   2   3  -85.57  268.78
  15   2  -3   10.99  160.20
 -15  -2  -3   81.27  185.79
 -15  -2  -3  151.86  178.23
 -15  -2  -3   26.32  255.66
  15   2  -2  -28.14  139.70
 -15   2   2   88.82  269.81
 -15  -2  -2  401.79  174.60
 -15  -2  -2    0.54  177.14
 -15  -2  -2  121.42  224.95
 -15   2   1   78.96  184.34
 -15  -2  -1 -194.19  240.79
 -15   2   1  175.31  304.64
  15   2  -1  378.12  179.23
 -15  -2  -1   91.52  191.06
 -15   2   1  318.75  291.42
 -15  -2   0  241.26  207.27
 -15   2   0  -42.96  281.62
 -15   2   0  -48.94  281.66
 -15   2   0  176.32  186.35
 -15  -2   0  478.87  247.49
  15   1 -13  -55.43  159.75
  15  -1  13   95.23  163.84
 -15   1  13    8.19  158.85
  15  -1  13 -326.79  159.16
  15   1 -12  -30.11  164.74
 -15   1  12  -32.06  164.27
  15  -1  12   -0.50  164.63
  15  -1  12    2.91  169.31
 -15   1  11  268.12  373.18
  15  -1  11  251.75  188.29
  15   1 -11   63.78  154.18
 -15   1  10   14.33  364.44
  15   1 -10  119.57  155.28
  15  -1  10  206.33  181.17
 -15   1   9 -161.57  155.93
  15   1  -9  140.11  155.13
  15  -1   9  -52.69  159.71
 -15   1   8  351.88  326.43
  15   1  -8  182.40  158.03
 -15  -1  -8  137.49  167.28
  15  -1   8  249.02  178.87
  15   1  -7  173.38  163.08
 -15   1   7  275.75  302.11
 -15  -1  -7  147.87  198.72
  15   1  -6  355.30  157.29
 -15  -1  -6  232.77  203.87
 -15   1   6  157.93  319.17
 -15  -1  -6  240.19  232.01
 -15  -1  -5  490.42  259.95
 -15  -1  -5  -20.57  202.07
  15   1  -5  448.52  153.52
 -15   1   5   95.07  279.33
 -15  -1  -4  446.79  270.13
 -15  -1  -4   97.59  211.03
 -15  -1  -4  346.90  169.67
  15   1  -4  213.65  160.54
 -15   1   4  203.00  274.45
 -15   1   4  401.43  134.38
 -15  -1  -3  538.46  260.79
  15   1  -3  414.07  154.00
 -15  -1  -3  185.94  214.05
 -15   1   3  327.62  258.24
 -15  -1  -3  381.51  173.19
 -15   1   3  320.93  124.37
 -15   1   3   99.01  261.21
 -15   1   2  -10.28  258.47
 -15  -1  -2  173.36  267.12
 -15  -1  -2  170.93  166.20
  15   1  -2  147.37  176.25
 -15   1   2  264.72  251.06
 -15  -1  -2  160.85  214.38
 -15   1   1  547.24  282.88
 -15  -1  -1  180.79  209.43
 -15  -1  -1  295.76  241.81
 -15   1   1  501.58  277.58
 -15  -1  -1  162.34  186.46
 -15  -1   0 -133.93  169.63
 -15   1   0  146.07  165.52
 -15   1   0  293.25  273.69
 -15  -1   0 -239.31  247.69
 -15   1   0    8.81  268.68
 -15   1   0   52.52  180.19
 -15  -1   0  -79.23  187.56
  15   0 -13  175.41  163.07
  15   0 -12  -43.91  183.30
  15   0 -11  -71.20  175.83
  15   0 -10   38.76  160.02
 -15   0  -9  -38.28  187.48
  15   0  -9  -22.27  185.52
 -15   0  -8  250.60  214.40
  15   0  -8  109.36  139.09
 -15   0  -8  160.22  161.00
 -15   0  -7  -33.82  172.20
 -15   0  -7 -279.62  175.23
  15   0  -7  -30.06  172.60
 -15   0  -6 -124.33  155.89
 -15   0  -6 -148.82  152.86
  15   0  -6  102.50  153.28
 -15   0  -5 -166.43  208.49
 -15   0  -5   61.99  211.91
  15   0  -5    8.10  128.67
 -15   0  -4 -211.10  218.58
  15   0  -4  297.80  144.87
 -15   0  -4   31.67  269.52
 -15   0  -3  394.25  232.09
 -15   0  -3  122.51  263.54
  15   0  -3  101.47  145.27
 -15   0  -3  164.96  183.41
 -15   0  -2   44.08  238.94
 -15   0  -2  -28.95  206.18
 -15   0  -2  436.73  252.44
 -15   0  -2   -0.80  183.36
  15   0  -2  292.11  146.82
 -15   0  -1   64.10  215.81
 -15   0  -1  -43.63  217.78
 -15   0  -1   97.36  214.82
 -15   0  -1   16.09  215.23
 -15   0   0 -182.33  159.42
 -15   0   0 -188.71  159.78
 -15   0   0  -99.66  159.68
  14 -17   2   34.69  228.58
 -14  17   2  -91.77  231.12
  14  17  -2  -52.70  228.66
  14 -17   2  155.88  230.44
 -14 -17  -2 -147.14  226.15
  14 -17   1  265.83  184.17
 -14 -17  -1  404.30  218.38
 -14  17   1  720.53  373.27
  14  17  -1  143.41  153.05
 -14 -17   0  268.01  231.40
  14  16  -6   74.41  195.44
  14 -16   6  141.75  236.98
 -14  16   6  251.09  356.31
 -14 -16  -6 -112.29  194.24
  14 -16   5 -103.82  220.10
  14  16  -5  -45.18  220.05
 -14 -16  -5  161.31  217.48
 -14  16   5 -188.60  221.52
  14  16  -4   25.12  180.88
 -14 -16  -4  226.05  215.29
  14 -16   4  256.56  158.47
 -14  16   4  575.93  347.65
  14 -16   4  771.56  248.33
 -14  16   4  267.24  165.93
 -14 -16  -3  237.20  224.99
 -14  16   3  215.07  169.58
 -14  16   3  363.36  294.40
  14 -16   3   64.56  174.61
  14 -16   3  411.52  232.80
 -14  16   2  372.71  320.80
  14  16  -2  308.46  129.48
  14 -16   2  100.24  180.53
 -14 -16  -2  288.46  223.08
  14 -16   2  760.80  252.09
  14  16  -1  161.51  140.94
 -14 -16  -1  117.69  238.88
 -14  16   1  407.68  358.69
 -14 -16   0  195.36  247.12
  14 -15   8  483.35  281.75
 -14 -15  -8  179.37  215.13
 -14  15   8  249.13  354.56
  14  15  -8  392.42  188.75
  14 -15   7   13.77  247.11
 -14  15   7   90.87  333.89
 -14 -15  -7  344.62  180.68
  14  15  -7 -105.34  204.98
 -14  15   7  285.97  154.29
 -14 -15  -6  226.92  201.13
  14 -15   6  238.38  271.93
 -14  15   6    7.85  342.69
 -14  15   6  345.10  141.88
  14  15  -6  209.32  204.83
 -14  15   5  628.15  329.55
  14 -15   5  162.74  240.03
 -14 -15  -5  153.07  204.78
  14  15  -5  253.60  194.54
  14 -15   5  -19.96  154.28
 -14 -15  -4  116.25  226.76
  14 -15   4  123.40  203.10
 -14  15   4  200.80  328.77
  14 -15   4  295.47  163.53
  14 -15   3  224.21  217.99
 -14 -15  -3 -146.64  213.94
 -14  15   3   36.03  217.48
  14  15  -3  -43.29  213.49
  14 -15   3  151.70  216.52
 -14  15   3 -276.68  218.79
  14  15  -2  101.87  130.34
  14 -15   2 -138.17  220.51
  14 -15   2  181.16  180.71
 -14  15   2 -123.09  301.97
 -14 -15  -2   33.05  242.50
  14  15  -1  121.38  154.53
  14 -15   1   37.77  189.72
 -14  15   1  473.61  327.41
 -14 -15  -1   -8.74  237.59
 -14 -15   0   11.27  237.53
 -14  14  10  -15.65  296.26
  14  14 -10  274.82  227.32
  14 -14  10 -211.32  240.11
  14  14  -9  197.86  190.24
 -14 -14  -9  287.94  213.42
  14 -14   9  -48.51  264.40
 -14  14   9 -138.06  326.38
 -14 -14  -8  139.39  220.46
  14  14  -8   19.66  221.21
 -14  14   8   95.58  222.56
  14 -14   8 -247.31  221.20
 -14  14   7  181.59  302.22
  14  14  -7   13.74  196.22
  14 -14   7  -32.95  236.18
 -14 -14  -7  121.27  216.64
  14 -14   6  134.69  231.50
  14  14  -6  202.11  180.15
 -14 -14  -6   -7.64  219.60
 -14  14   6   90.54  321.30
  14 -14   5 -386.35  222.86
  14  14  -5  189.33  190.51
  14 -14   5   27.01  157.33
 -14  14   5  183.44  294.18
 -14 -14  -5  380.06  200.98
 -14  14   4  314.54  336.72
  14 -14   4  -10.16  167.74
  14 -14   4  -35.51  242.17
 -14 -14  -4  168.50  219.14
 -14 -14  -3   76.92  215.08
  14 -14   3   -3.95  157.43
  14  14  -3   -4.80  123.25
 -14  14   3  -29.02  316.03
  14 -14   3  103.98  222.88
  14 -14   2   79.90  199.02
  14  14  -2  259.50  126.50
  14 -14   2  472.56  166.73
 -14  14   2  324.05  296.14
 -14 -14  -2  195.34  198.28
 -14  14   1  -55.62  292.70
  14 -14   1  -15.27  171.17
 -14 -14  -1  177.62  221.23
 -14 -14   0  512.52  252.70
 -14  14   0  750.32  348.14
 -14  13  11  195.82  303.19
  14  13 -11  -60.82  226.73
 -14 -13 -11   74.82  198.01
  14 -13  11  195.17  219.16
 -14  13  10  -71.09  325.44
  14  13 -10  213.55  209.22
  14 -13  10 -234.82  255.93
 -14 -13 -10  334.09  187.71
  14  13  -9  212.70  195.05
 -14 -13  -9  453.86  206.38
  14 -13   9   39.32  256.37
 -14 -13  -8  414.77  229.17
 -14  13   8  659.21  314.26
  14 -13   8  141.33  250.11
  14  13  -8  155.91  176.73
  14 -13   7  263.89  246.99
 -14 -13  -7  393.85  210.29
  14  13  -7  301.92  182.34
 -14  13   7  110.45  312.90
  14 -13   6  332.20  251.31
  14  13  -6  229.10  175.76
 -14  13   6  896.76  323.99
 -14 -13  -6  387.33  225.66
  14  13  -5  527.29  193.46
  14 -13   5  355.07  173.18
 -14 -13  -5  564.18  233.74
  14 -13   5  374.09  240.33
  14 -13   4  447.04  231.77
  14 -13   4   94.72  172.12
 -14  13   4  431.07  333.83
 -14 -13  -4  453.66  195.81
  14  13  -4  208.03  122.96
  14 -13   3  345.14  170.29
  14 -13   3  524.63  246.38
 -14  13   3  429.23  355.73
  14  13  -3  189.17  132.31
 -14 -13  -3  318.26  231.34
  14 -13   2  133.03  165.27
 -14 -13  -2  251.23  236.49
 -14  13   2  296.00  290.51
  14  13  -2  -32.88  120.83
  14 -13   1  150.42  236.08
 -14 -13  -1  -34.94  204.44
  14  13  -1   86.43  131.99
 -14  13   1  -39.05  312.74
 -14  13   0  237.10  317.59
 -14 -13   0  275.28  220.72
  14 -12  12   34.75  209.42
  14  12 -12 -370.18  209.11
 -14  12  12  -76.15  209.28
  14  12 -11   99.10  202.52
 -14  12  11  100.57  294.82
  14 -12  11  372.16  239.00
  14 -12  10   25.93  235.96
  14  12 -10  307.34  197.83
  14 -12   9  166.08  253.28
 -14  12   9  202.50  332.89
  14  12  -9  -31.23  179.54
  14  12  -8   -8.28  256.09
 -14  12   8   52.96  257.21
  14 -12   8 -434.77  256.54
 -14 -12  -8  313.94  255.07
 -14 -12  -7  -24.93  217.79
 -14  12   7  498.64  309.80
  14  12  -7  124.68  165.77
  14 -12   7  100.34  258.56
 -14  12   6  602.75  303.06
  14 -12   6  103.40  246.47
  14  12  -6  144.11  174.95
 -14 -12  -6   48.70  213.41
 -14 -12  -5  327.15  197.99
 -14  12   5  -10.35  299.05
  14  12  -5   39.12  214.09
  14 -12   5  146.60  228.55
  14  12  -4  433.03  126.70
 -14 -12  -4  532.66  224.91
  14 -12   4  391.59  249.04
 -14  12   4  622.54  312.43
  14 -12   4  480.23  164.21
  14 -12   3 -227.83  209.44
 -14  12   3  520.75  326.58
  14  12  -3    3.76  124.07
 -14 -12  -3  250.54  236.82
  14 -12   3   91.89  174.55
 -14  12   2  449.66  178.42
 -14 -12  -2  201.72  219.29
  14 -12   2  258.71  173.66
  14  12  -2  180.28  125.37
 -14  12   2   70.99  275.77
 -14 -12  -1  109.53  208.99
  14  12  -1  219.63  126.76
 -14  12   1   63.44  285.48
  14 -12   1  106.15  184.11
 -14  12   0  204.65  135.53
 -14 -12   0   30.94  132.60
 -14  12   0 -123.83  133.73
  14  11 -13  -21.64  188.74
  14 -11  13  102.08  229.29
 -14  11  13  344.79  270.36
  14 -11  12   19.57  256.06
  14  11 -12  245.72  204.27
 -14  11  12   89.60  245.67
 -14  11  11  -31.44  295.24
  14 -11  11 -142.40  259.68
 -14 -11 -11   21.50  198.33
  14  11 -11  213.71  167.82
  14 -11  10  -61.55  217.06
 -14  11  10 -275.03  216.89
  14  11 -10  -26.99  216.71
 -14 -11 -10  278.17  217.13
 -14 -11  -9 -112.50  217.65
 -14  11   9   17.60  218.30
  14 -11   9 -279.69  218.32
  14  11  -9  148.38  217.88
 -14  11   8  210.14  218.95
  14  11  -8 -109.32  218.28
 -14 -11  -8 -286.40  217.36
  14 -11   8 -310.95  218.85
  14  11  -7 -109.05  205.37
 -14 -11  -7  -44.08  203.96
 -14  11   7 -231.21  206.25
  14 -11   7  -27.63  206.09
  14 -11   6 -183.50  222.70
 -14 -11  -6  -57.18  216.97
 -14  11   6  498.07  287.50
  14  11  -6    5.07  184.49
 -14  11   5  317.66  282.42
  14 -11   5  161.87  223.88
  14  11  -5 -132.95  170.28
 -14 -11  -5  -54.13  206.65
 -14 -11  -4  278.71  210.09
  14 -11   4  -32.40  212.51
 -14  11   4 -352.05  214.32
  14 -11   4  175.33  214.13
  14  11  -4  -67.25  210.04
  14 -11   3    0.91  204.66
  14 -11   3  150.80  161.39
  14  11  -3  117.50  129.89
 -14 -11  -3  259.10  212.04
 -14  11   3  859.29  313.35
 -14  11   3  120.23  180.94
 -14 -11  -2  -27.99  189.41
  14  11  -2   82.54  133.29
  14 -11   2    6.93  188.46
 -14  11   2  384.59  301.97
 -14 -11  -1  438.68  207.44
 -14  11   1  415.95  159.79
  14  11  -1  321.41  142.78
  14 -11   1  113.66  181.12
 -14  11   1  394.00  284.13
 -14 -11   0 -149.41  141.91
 -14  11   0 -194.16  144.91
  14  10 -14  -35.96  185.11
  14 -10  14 -149.68  185.61
  14 -10  13 -148.13  178.52
  14  10 -13  153.27  178.14
 -14  10  13 -179.50  177.18
 -14  10  12    9.10  269.58
  14 -10  12  338.60  237.10
  14  10 -12   64.23  186.78
 -14  10  11  249.33  250.02
  14  10 -11   74.95  183.09
  14 -10  11  114.32  231.53
  14 -10  10  319.93  242.65
 -14  10  10  331.52  310.18
  14  10 -10  139.70  161.54
 -14 -10 -10  131.29  229.12
 -14  10   9  704.74  288.83
  14  10  -9  116.24  159.42
 -14 -10  -9   80.12  227.98
  14  10  -8  222.89  156.86
 -14  10   8  425.39  295.13
 -14 -10  -8  393.37  208.37
  14 -10   8  405.14  246.75
  14 -10   7  426.11  243.39
 -14  10   7  925.05  326.65
  14  10  -7  474.93  172.95
 -14 -10  -7  348.32  231.91
  14  10  -6  245.05  170.20
 -14  10   6  470.65  314.11
  14 -10   6   84.58  256.23
 -14 -10  -6  -61.83  212.08
 -14  10   5  291.07  142.11
 -14 -10  -5  235.98  203.04
  14  10  -5   69.86  162.35
  14 -10   5  279.77  225.49
 -14 -10  -4  744.03  214.35
  14  10  -4  417.97  123.53
  14 -10   4  176.89  231.74
 -14  10   4  745.52  302.20
 -14  10   3  191.65  329.98
 -14 -10  -3  298.32  197.58
  14 -10   3  -35.16  150.23
  14 -10   2  775.09  180.97
  14  10  -2  450.61  135.12
 -14 -10  -2  800.45  246.41
 -14  10   2  681.81  190.06
 -14  10   1  -18.40  287.64
 -14 -10  -1  244.18  224.76
  14  10  -1  -59.36  133.22
 -14  10   1  231.05  158.45
  14 -10   1  152.48  157.93
 -14  10   0  751.15  175.18
 -14 -10   0  515.75  235.35
 -14  10   0  583.91  279.65
 -14   9  14  172.28  289.25
  14   9 -14  275.00  191.58
  14  -9  13 -134.60  223.88
 -14   9  13   98.84  279.06
  14   9 -13  207.19  193.77
 -14   9  12  243.88  277.47
 -14  -9 -12  123.77  142.03
  14   9 -12  346.58  197.83
  14  -9  12  219.89  222.04
  14   9 -11  -83.66  154.55
 -14  -9 -11  112.11  155.06
  14  -9  11   57.26  154.88
 -14   9  11  -87.81  153.79
  14  -9  10    1.25  234.69
  14   9 -10   32.68  183.59
 -14   9  10  508.44  273.60
 -14  -9 -10  108.09  205.51
  14   9  -9  106.55  183.29
 -14   9   9  189.22  279.11
  14   9  -8  226.05  177.42
 -14   9   8  406.50  280.33
  14  -9   8  200.55  217.62
  14  -9   7  -29.72  241.75
  14   9  -7  245.88  160.12
 -14   9   7 -186.13  273.25
 -14  -9  -7   58.92  201.17
  14  -9   6 -133.61  228.57
  14   9  -6  239.37  161.99
 -14  -9  -6  218.98  214.67
 -14   9   6 -221.34  295.22
 -14  -9  -5  -42.35  192.77
  14  -9   5  196.36  221.30
 -14   9   5  793.97  279.08
  14   9  -5   18.06  158.63
  14   9  -4  164.64  158.82
 -14  -9  -4   39.55  203.58
  14  -9   4   55.66  195.41
 -14   9   4  -30.43  290.77
 -14   9   3  552.10  169.63
  14   9  -3  158.29  124.73
  14   9  -3  359.78  177.06
 -14   9   3  263.49  282.95
 -14  -9  -3  481.41  205.06
  14  -9   2  465.85  172.10
 -14   9   2  899.89  291.21
 -14  -9  -2  739.08  219.59
 -14   9   1  635.33  171.70
 -14   9   1  367.97  277.68
  14  -9   1  246.42  166.01
 -14  -9  -1  388.78  251.16
  14   9  -1  233.04  126.90
 -14   9   0  729.13  302.05
 -14  -9   0  750.38  236.39
 -14   9   0  557.60  188.44
  14   8 -15  -81.10  202.49
  14  -8  14   86.04  220.64
  14   8 -14   32.91  185.18
  14   8 -13 -151.27  194.80
  14  -8  13 -232.40  195.09
 -14   8  12  213.39  264.72
  14  -8  12  245.62  206.78
  14   8 -12  -33.32  192.06
  14  -8  11  -43.62  202.71
  14   8 -11  233.46  185.22
 -14  -8 -10   -1.11  174.53
  14   8 -10   42.16  189.08
 -14   8  10  345.52  262.27
  14   8  -9  388.45  178.58
  14  -8   9  418.38  209.57
 -14   8   9   41.86  289.62
  14  -8   8  178.90  208.96
 -14  -8  -8  273.97  213.09
 -14   8   8  312.31  299.03
  14   8  -8  290.34  178.45
 -14   8   7  115.01  260.40
 -14  -8  -7  303.67  205.68
  14  -8   7  114.21  203.41
  14   8  -7  129.28  169.63
  14  -8   6   19.65  206.36
 -14  -8  -6  374.53  201.32
 -14   8   6  645.26  286.83
  14   8  -6   97.90  158.81
  14   8  -5  -73.72  147.11
  14   8  -5   -8.55  123.16
 -14  -8  -5   32.48  197.33
  14  -8   5   64.52  189.70
 -14   8   5  398.43  276.19
 -14  -8  -4   74.10  206.50
 -14   8   4    6.60  241.37
 -14   8   3   21.13  220.11
 -14  -8  -3 -252.78  216.43
  14   8  -3  -28.68  218.09
  14   8  -2 -206.43  202.34
 -14   8   2   72.13  203.15
 -14  -8  -2  -34.24  201.06
 -14   8   2  107.73  204.55
  14  -8   1 -106.91  240.07
 -14  -8  -1  207.95  237.07
  14   8  -1  -55.70  238.59
 -14   8   1  137.96  238.66
 -14   8   1 -148.13  241.12
 -14  -8   0   29.98  232.92
 -14   8   0  -17.38  233.73
 -14   8   0 -343.02  236.68
  14  -7  16   31.38  222.03
  14   7 -16  -17.71  199.76
  14   7 -15  -80.79  182.25
  14  -7  14  -24.92  191.43
  14   7 -14  108.10  202.19
  14   7 -13   -9.38  201.41
  14  -7  13  -87.92  201.61
  14  -7  12  223.54  206.51
  14   7 -12  365.98  203.35
  14  -7  11  -20.44  179.93
  14   7 -11 -100.82  179.51
  14   7 -10  434.89  183.91
 -14   7  10  183.75  269.32
  14  -7  10   56.28  202.01
 -14   7   9  194.24  240.14
 -14  -7  -9  166.62  229.60
  14   7  -9  -92.35  197.13
  14  -7   9 -135.54  202.91
  14  -7   8  144.63  199.63
  14   7  -8 -120.12  198.54
 -14  -7  -8  -42.89  197.79
 -14  -7  -7   85.93  194.88
  14   7  -7   -4.92  195.96
  14  -7   7   59.19  197.27
 -14   7   7 -155.12  195.89
 -14   7   6  405.56  269.67
  14   7  -6  195.22  176.29
 -14  -7  -6  176.02  200.55
  14  -7   6  343.33  178.16
  14   7  -5  -61.04  155.89
 -14  -7  -5  133.11  226.66
  14  -7   5    1.65  189.16
 -14  -7  -5  262.08  175.74
 -14   7   5 -120.00  275.32
  14   7  -5  126.09  118.27
  14   7  -4  150.30  169.23
 -14   7   4   87.99  154.98
  14   7  -4  119.25  132.80
 -14   7   4  197.66  269.97
 -14  -7  -4  303.20  193.78
  14   7  -3  284.66  119.53
 -14   7   3  419.48  183.56
  14   7  -3  383.72  165.01
 -14   7   3  598.66  278.38
 -14  -7  -3  268.06  209.60
 -14   7   2  524.20  183.13
  14   7  -2  344.91  120.28
  14   7  -2  460.68  155.24
 -14   7   2  422.60  302.38
 -14  -7  -2  230.04  243.18
  14   7  -1  608.03  136.25
 -14   7   1  861.44  295.73
 -14  -7  -1 1011.38  229.24
 -14   7   1 1048.79  190.73
 -14   7   0  880.61  187.19
 -14   7   0  480.28  283.24
 -14  -7   0  771.15  272.36
  14  -6  16 -179.31  204.37
  14   6 -16   -9.61  204.62
  14   6 -15  -41.13  183.68
  14  -6  14  157.34  199.55
  14   6 -14 -126.59  199.61
  14   6 -13   13.62  186.88
  14  -6  13  -90.57  186.95
  14   6 -12  211.10  185.77
  14  -6  12   46.76  184.67
  14   6 -11  -71.80  175.70
  14  -6  11  -90.65  176.09
  14   6 -10  375.74  183.68
  14  -6  10  233.36  199.46
  14   6  -9  309.87  191.50
  14  -6   9   91.84  178.63
 -14   6   9  376.51  241.75
  14  -6   8  580.14  212.57
  14   6  -8  630.10  192.52
 -14  -6  -7  652.49  202.23
  14   6  -7  534.43  178.90
  14  -6   7  729.11  198.65
 -14  -6  -6  529.09  211.01
 -14   6   6  427.51  259.20
  14   6  -6  273.00  176.39
  14  -6   6  462.30  174.69
  14   6  -5  843.80  186.72
 -14  -6  -5  793.35  225.51
 -14   6   5  738.97  285.51
 -14   6   4  485.18  295.45
 -14  -6  -4  607.91  199.31
 -14   6   4  569.71  146.62
  14   6  -4  555.10  172.53
  14   6  -4  186.41  118.87
 -14   6   3  523.11  170.76
  14   6  -3  150.67  118.32
  14   6  -3  180.29  154.57
 -14   6   3  250.88  258.22
 -14  -6  -3  287.72  213.52
  14   6  -2  550.49  232.58
  14   6  -2  293.35  120.24
 -14   6   2  321.60  169.06
 -14   6   2  311.13  273.95
 -14  -6  -2   74.71  205.39
 -14   6   1  226.92  240.44
  14   6  -1  254.61  110.23
 -14   6   1  300.76  163.13
  14   6  -1   48.98  147.06
 -14  -6  -1  303.69  204.56
 -14   6   0  428.13  156.69
 -14  -6   0  371.24  238.64
 -14   6   0    9.03  244.99
  14   5 -16   67.41  200.53
  14  -5  15  -13.08  193.00
  14   5 -15  194.20  195.42
  14  -5  14  -27.60  212.31
  14   5 -14  -24.95  212.61
  14  -5  13   31.42  187.19
  14   5 -13  153.91  213.70
  14  -5  12  208.56  188.02
  14   5 -12  243.71  216.77
  14   5 -11  163.48  191.10
  14  -5  10  145.96  179.32
  14   5 -10   75.93  187.06
  14   5  -9 -155.40  193.38
 -14  -5  -9 -110.94  193.12
  14  -5   9  -87.35  194.28
 -14  -5  -8  -71.50  218.20
  14  -5   8 -296.41  220.15
  14   5  -8   41.18  218.84
 -14  -5  -7  227.93  209.94
  14  -5   7   49.41  172.59
  14   5  -7   -7.00  170.23
 -14  -5  -6   34.11  194.67
  14  -5   6  249.16  163.45
 -14   5   6  132.38  231.02
  14   5  -6   74.08  161.77
 -14   5   5  486.39  226.40
 -14  -5  -5 -153.55  187.83
 -14  -5  -5   73.59  182.42
  14   5  -5  141.89  158.16
 -14   5   4  -20.59  246.29
 -14  -5  -4  196.11  216.44
  14   5  -4  238.69  148.90
 -14   5   4   74.02  155.21
 -14  -5  -3   37.39  172.38
  14   5  -3  -13.82  149.44
 -14   5   3  164.20  173.35
 -14   5   3  399.53  254.50
 -14  -5  -3  195.29  219.51
  14   5  -3  107.29  120.10
 -14  -5  -2 -120.95  195.45
 -14  -5  -2   81.46  159.79
 -14   5   2   90.80  149.17
  14   5  -2   35.89  153.80
 -14   5   2  -33.90  243.33
  14   5  -2  120.53  117.43
 -14   5   1  214.70  160.58
  14   5  -1   92.05  158.09
 -14  -5  -1 -104.01  225.62
 -14   5   1   29.46  244.48
 -14  -5  -1  -51.42  167.57
 -14  -5   0   76.20  213.87
 -14  -5   0   22.93  168.08
 -14   5   0   86.48  155.89
 -14   5   0 -123.10  262.31
 -14   5   0   72.63  253.33
  14  -4  17  184.13  220.12
  14   4 -17  190.24  214.33
  14   4 -16  -79.79  209.88
  14  -4  16    1.91  208.85
  14   4 -15  125.61  203.11
  14   4 -14  155.87  185.88
  14  -4  14 -161.87  185.43
  14  -4  13  425.29  181.03
  14   4 -13  311.82  196.06
  14   4 -12  -26.91  196.04
  14  -4  12 -170.38  196.11
  14  -4  11  103.42  182.47
  14   4 -11 -227.38  182.14
  14  -4  10 -234.39  186.91
  14   4 -10  109.93  186.30
  14   4  -9  133.27  161.12
  14  -4   9   35.77  164.98
  14   4  -8  157.51  167.44
  14  -4   8  192.64  161.77
 -14   4   8  442.27  229.99
 -14  -4  -7  252.14  215.75
  14  -4   7 -191.78  218.13
  14   4  -7  -51.72  216.52
 -14  -4  -6  418.96  186.88
  14   4  -6   64.09  160.87
 -14  -4  -6  285.58  173.02
 -14  -4  -6   73.36  195.80
 -14  -4  -5 -236.97  168.30
 -14  -4  -5  193.85  194.28
 -14  -4  -5  220.67  201.12
 -14   4   5  193.48  127.59
  14   4  -5    1.55  152.78
 -14  -4  -4  556.99  181.11
 -14  -4  -4  556.29  236.84
 -14   4   4  603.81  159.02
  14   4  -4  701.50  179.41
 -14  -4  -4  658.18  203.41
 -14   4   4  729.90  257.19
 -14   4   3  197.88  256.81
 -14  -4  -3  530.07  175.83
 -14   4   3  244.52  155.80
 -14  -4  -3  270.65  175.54
 -14  -4  -3  179.96  211.60
  14   4  -3   -8.24  169.45
 -14   4   2  894.64  173.46
 -14  -4  -2  632.21  204.63
 -14   4   2  967.00  272.81
  14   4  -2  571.33  174.27
 -14  -4  -2  693.47  194.64
  14   4  -2  661.19  137.51
 -14   4   2  761.44  278.58
 -14  -4  -1  169.76  177.13
  14   4  -1  183.40  154.67
 -14   4   1   -9.46  266.61
  14   4  -1  213.71  127.04
 -14   4   1  187.53  261.84
 -14  -4  -1  527.32  225.41
 -14   4   1   36.75  154.94
 -14  -4   0  951.96  187.79
 -14   4   0  959.82  194.14
 -14  -4   0 1127.97  254.49
 -14   4   0  828.29  261.76
  14   3 -17  289.73  219.66
  14   3 -16  289.91  200.18
  14  -3  16   67.32  165.78
  14   3 -15 -117.83  186.48
  14  -3  15  129.56  177.47
  14  -3  14  -71.67  186.50
  14   3 -14  158.31  184.74
  14   3 -13   19.06  179.49
  14  -3  13  330.74  182.28
  14  -3  12   25.15  188.16
  14  -3  12   68.75  157.82
  14   3 -12  143.41  186.49
  14  -3  11  273.79  179.97
  14  -3  11   -9.27  181.65
  14   3 -11   68.00  177.88
  14  -3  10  145.56  178.49
  14   3 -10  204.27  169.35
  14  -3   9  270.49  170.79
  14   3  -9  425.33  155.20
  14  -3   8  507.81  168.98
 -14  -3  -8  559.31  227.64
  14   3  -8  644.00  190.55
 -14  -3  -7  454.60  227.12
 -14  -3  -7  364.13  202.54
  14   3  -7  162.94  175.09
  14   3  -6  391.45  169.40
 -14  -3  -6  663.97  184.64
 -14  -3  -6  685.10  235.97
 -14   3   6  562.48  124.01
 -14  -3  -6  816.67  189.80
 -14   3   5  663.89  148.57
 -14  -3  -5  774.00  226.70
 -14  -3  -5  589.37  192.97
  14   3  -5  704.31  162.42
 -14  -3  -5 1034.32  189.31
 -14  -3  -4  521.75  186.56
 -14   3   4 -109.65  281.00
  14   3  -4  423.97  158.89
 -14   3   4  498.36  141.75
 -14  -3  -4  523.27  216.18
 -14  -3  -4  591.71  195.66
 -14  -3  -3 1223.35  241.99
 -14  -3  -3 1313.43  217.49
 -14  -3  -3 1263.01  214.24
 -14   3   3 1364.45  329.70
  14   3  -3 1146.60  188.29
 -14  -3  -2  161.32  210.03
  14   3  -2   99.52  147.50
 -14   3   2  -93.27  262.05
 -14   3   2  227.30  150.02
 -14  -3  -2   82.45  190.21
 -14   3   1  874.71  267.28
  14   3  -1  736.19  123.54
 -14  -3  -1  888.67  222.80
 -14   3   1 1173.79  279.85
 -14  -3  -1  905.50  240.72
  14   3  -1  596.75  180.62
 -14   3   1  932.48  175.02
 -14   3   1  892.90  153.83
 -14  -3   0  258.24  205.25
 -14   3   0  267.02  164.27
 -14   3   0   98.25  220.58
 -14  -3   0  109.02  225.80
 -14   3   0  128.36  240.14
  14   2 -17   90.67  187.37
  14   2 -16   43.18  183.44
  14  -2  16  185.27  179.78
  14  -2  16   23.46  209.19
  14  -2  15  -48.41  195.00
  14   2 -15   41.63  196.28
  14  -2  14    2.38  179.77
  14   2 -14 -109.81  180.60
  14   2 -13   20.91  174.12
  14  -2  12  174.69  176.60
  14   2 -12  315.04  174.52
  14  -2  12  191.65  177.90
  14  -2  11  126.77  172.93
  14  -2  11  -47.51  196.03
  14   2 -11  139.36  162.40
  14   2 -10  152.01  158.74
  14  -2  10  151.00  164.02
  14  -2  10  328.29  193.74
 -14  -2  -9  282.75  186.78
  14  -2   9  135.04  188.00
  14  -2   9   49.04  162.27
 -14  -2  -9   40.77  197.19
  14   2  -9 -196.28  144.60
 -14  -2  -8  120.81  207.11
  14   2  -8  220.55  159.03
  14  -2   8  -62.11  148.13
  14  -2   8   28.45  164.34
 -14  -2  -7 -105.45  186.91
  14   2  -7   69.29  138.53
 -14  -2  -7   38.00  223.14
 -14  -2  -6   93.28  224.50
 -14   2   6 -138.42  210.79
 -14   2   6  264.21  290.82
  14   2  -6  149.43  138.95
 -14  -2  -6  109.81  216.21
 -14   2   6  -12.05  119.03
 -14  -2  -5  113.38  206.71
  14   2  -5  211.47  149.63
 -14   2   5 -119.59  231.21
 -14  -2  -5   29.21  205.59
 -14   2   5  160.11  118.50
 -14  -2  -4  102.15  196.30
 -14  -2  -4  100.00  157.13
 -14   2   4   43.26  137.33
  14   2  -4   91.13  144.91
 -14   2   4  125.85  273.80
 -14  -2  -4   83.66  190.53
 -14  -2  -3  159.14  169.12
 -14  -2  -3  154.23  212.35
 -14  -2  -3  118.57  211.50
 -14   2   3  230.42  144.20
  14   2  -3  193.87  146.51
 -14   2   3  423.11  233.73
 -14  -2  -2   44.45  211.50
 -14   2   2  248.13  258.29
  14   2  -2    4.05  138.29
 -14   2   2   51.91  153.44
  14   2  -1  233.48  157.20
 -14  -2  -1  490.34  212.97
 -14   2   1  350.63  235.15
 -14  -2  -1  273.04  226.86
 -14  -2   0  -21.53  225.44
 -14   2   0  257.27  215.31
 -14   2   0   -0.05  137.86
 -14   2   0  217.28  167.21
 -14  -2   0   13.54  235.51
  14  -1  17  -79.53  171.61
  14   1 -17 -177.75  173.80
  14   1 -16  264.30  177.33
  14  -1  15 -224.45  172.73
  14   1 -15  -26.88  174.05
  14   1 -14   73.30  159.58
  14  -1  14  112.67  180.80
  14  -1  13  247.38  206.95
  14  -1  13   84.55  167.19
 -14   1  13  -88.33  217.80
  14   1 -13   22.79  180.66
  14  -1  12   41.18  161.75
  14   1 -12   68.40  157.58
  14  -1  11  437.04  200.17
  14   1 -11  117.42  147.68
  14  -1  11 -170.32  158.07
  14  -1  10   86.46  157.18
  14  -1  10 -101.72  209.38
  14   1 -10   84.56  142.37
  14  -1   9  493.88  194.46
 -14   1   9  186.93  275.52
  14   1  -9  212.66  151.63
  14  -1   9  283.11  149.63
 -14   1   8  329.29  300.38
  14  -1   8  406.76  184.86
  14   1  -8  348.20  149.87
 -14  -1  -8  313.88  208.44
 -14  -1  -8  315.86  196.20
 -14   1   8  283.33  226.67
 -14   1   7  425.54  272.23
 -14  -1  -7  568.94  232.76
 -14  -1  -7  590.98  226.13
  14  -1   7  635.30  177.86
 -14   1   7  363.31  120.00
  14   1  -7  181.60  148.05
 -14   1   6  209.73  117.69
 -14  -1  -6  344.27  225.92
 -14  -1  -6  231.51  237.53
 -14   1   6  124.25  262.11
  14   1  -6  249.64  135.46
  14  -1   6  135.11  154.01
 -14  -1  -5  353.02  235.77
  14   1  -5  195.71  152.55
 -14   1   5  543.30  310.49
 -14  -1  -5  327.24  221.58
 -14   1   5  241.91  134.91
 -14   1   4  140.05  268.37
 -14  -1  -4  166.88  228.57
 -14   1   4    8.61  190.51
 -14  -1  -4  227.60  219.67
 -14  -1  -4  325.55  149.72
 -14   1   4  130.07  127.79
  14   1  -4   54.10  129.97
 -14   1   3  675.46  262.53
 -14  -1  -3  503.86  208.80
 -14   1   3   30.65  153.61
  14   1  -3  214.12  134.83
 -14  -1  -3   36.97  239.55
 -14  -1  -2 -162.60  232.04
 -14  -1  -2  137.28  230.31
 -14   1   2  143.88  166.73
 -14  -1  -2   76.37  157.75
 -14   1   2   14.49  212.61
  14   1  -2  229.09  143.54
  14   1  -1  253.11  143.64
 -14  -1  -1  399.23  250.86
 -14   1   1  334.94  183.44
 -14  -1  -1  327.90  236.26
 -14   1   1  201.00  273.14
 -14  -1   0  154.96  244.12
 -14   1   0  282.95  165.96
 -14  -1   0  322.58  251.59
 -14   1   0  238.79  239.33
 -14   1   0  457.65  246.95
  14   0 -17  212.58  179.26
  14   0 -16 -245.17  161.34
  14   0 -15  141.35  175.03
  14   0 -14 -137.96  175.74
  14   0 -13  774.51  160.53
  14   0 -12  -19.41  151.30
  14   0 -11  690.23  165.85
  14   0 -10   78.20  151.97
  14   0  -9  345.53  141.95
  14   0  -8   71.57  134.71
 -14   0  -8   71.21  187.56
  14   0  -7  -73.73  122.41
 -14   0  -7    7.41  228.52
 -14   0  -7 -156.64  235.47
  14   0  -6  150.52  140.38
 -14   0  -6   47.24  214.70
 -14   0  -6  -50.69  243.26
  14   0  -5   45.78  138.81
 -14   0  -5    7.72  213.55
 -14   0  -5   42.58  253.89
 -14   0  -4  429.87  218.87
 -14   0  -4  117.95  248.95
  14   0  -4  389.17  140.25
 -14   0  -3  478.56  198.59
  14   0  -3  191.73  128.66
 -14   0  -3   42.99  246.13
 -14   0  -2  815.71  236.88
 -14   0  -2 1556.69  403.51
  14   0  -2  843.08  150.67
 -14   0  -1  550.88  236.53
  14   0  -1  638.99  148.71
 -14   0  -1  635.96  273.80
 -14   0  -1  674.90  165.35
 -14   0   0 1363.26  265.19
 -14   0   0 1573.66  203.32
  13 -20   1 -142.33  236.52
 -13  20   1   56.35  236.59
  13  20  -1  182.15  236.63
  13  20  -1 -123.19  246.63
 -13 -20  -1 -254.11  234.13
  13 -20   1  166.73  237.93
 -13 -20   0  -78.38  147.31
  13  19  -6   32.37  126.13
 -13 -19  -6  299.67  220.23
  13 -19   6 -153.95  246.06
  13  19  -6   83.78  210.02
 -13 -19  -5   76.15  152.02
 -13 -19  -5  253.34  227.87
  13  19  -5   25.93  128.07
  13  19  -5  275.07  194.59
  13 -19   5 -118.37  247.97
 -13 -19  -4  288.09  160.40
 -13 -19  -4  266.61  239.01
  13  19  -4  -28.21  133.56
  13  19  -4  109.44  179.41
  13 -19   4  210.08  254.98
  13  19  -4   42.34  148.76
  13 -19   4  322.31  174.41
 -13 -19  -3  -20.58  206.09
  13  19  -3  -98.30  209.04
 -13 -19  -3   43.52  205.77
  13 -19   3  -79.14  207.40
  13  19  -3  -82.97  208.60
  13 -19   3  313.33  208.74
  13 -19   2  -94.00  255.18
  13  19  -2  260.04  128.66
  13  19  -2  242.66  195.25
  13 -19   2   54.63  181.26
 -13 -19  -2  302.42  242.13
  13  19  -1  185.48  167.08
  13  19  -1  255.53  124.87
 -13 -19  -1  131.31  202.71
  13 -19   1  -22.61  184.56
  13 -19   1   64.29  250.59
 -13 -19   0  249.53  239.14
  13 -18   9    5.13  250.23
  13  18  -9  328.72  203.09
  13  18  -9  162.66  125.96
 -13 -18  -9  386.90  248.94
  13 -18   8  -79.07  203.11
  13  18  -8 -210.77  203.99
 -13 -18  -8   94.20  203.88
  13  18  -8 -166.82  203.84
  13  18  -7  140.85  197.36
  13  18  -7  136.28  140.11
  13 -18   7   86.63  236.25
 -13 -18  -7  105.84  212.77
  13  18  -6   55.53  125.87
  13 -18   6  193.45  226.07
  13  18  -6  384.32  189.91
 -13 -18  -6   78.16  234.46
  13 -18   5  166.62  169.08
 -13 -18  -5  442.90  225.04
  13  18  -5  227.26  130.78
 -13 -18  -5  329.22  156.07
  13  18  -5  371.96  180.68
  13 -18   5  450.04  233.71
 -13 -18  -4  257.69  153.61
  13  18  -4  331.79  129.54
  13  18  -4  295.16  174.15
  13  18  -4  140.19  134.06
 -13 -18  -4  250.50  216.63
  13 -18   4  109.68  160.84
  13 -18   4  610.91  254.89
  13  18  -3  263.00  177.85
  13 -18   3  280.65  168.93
  13  18  -3  269.53  131.59
  13 -18   3  341.32  254.01
 -13 -18  -3  419.53  251.96
  13  18  -3  110.77  138.90
 -13 -18  -3  323.02  147.77
 -13  18   2  648.76  193.65
  13 -18   2   91.51  182.68
  13  18  -2  180.23  147.78
  13  18  -2  178.64  129.87
  13 -18   2  411.07  250.59
 -13 -18  -2  199.99  246.74
  13  18  -2  470.67  197.77
  13 -18   1  537.80  197.01
 -13 -18  -1    7.96  252.93
  13  18  -1  246.59  139.28
  13  18  -1   24.76  138.67
  13 -18   1  586.21  279.84
 -13 -18   0  403.81  237.62
  13 -17  10   17.30  207.23
  13  17 -10    9.22  131.30
 -13 -17 -10 -112.57  211.42
  13  17 -10  199.15  202.09
 -13 -17  -9  385.99  210.13
  13  17  -9  -85.52  179.54
  13  17  -9  103.05  120.22
  13 -17   9  -70.84  222.33
  13  17  -8   54.52  131.64
  13 -17   8   25.17  248.56
  13  17  -8   89.11  169.37
 -13 -17  -8  180.89  201.46
 -13 -17  -7   14.44  194.51
  13 -17   7 -115.74  216.65
  13  17  -7   73.66  160.11
  13  17  -7   84.65  126.00
  13 -17   6  545.21  174.27
  13 -17   6  216.13  255.01
  13  17  -6  221.43  130.05
 -13 -17  -6   82.36  202.87
 -13 -17  -6   74.52  147.54
  13  17  -6  243.10  187.00
  13 -17   5  110.82  222.39
 -13 -17  -5   -1.55  138.32
  13 -17   5  183.54  149.85
  13  17  -5  -40.40  194.31
  13  17  -5  254.44  128.37
 -13 -17  -5   66.72  180.85
  13  17  -4  174.74  200.03
  13 -17   4   -4.98  189.11
 -13 -17  -4  129.57  138.75
 -13 -17  -4  153.94  244.30
  13 -17   4  203.65  213.47
  13  17  -4  128.57  123.78
  13  17  -4  125.05  127.23
  13 -17   3  114.25  169.57
 -13 -17  -3   73.77  141.31
 -13  17   3  209.75  157.60
  13 -17   3 -111.87  214.69
 -13  17   3  436.62  314.02
 -13 -17  -3   44.18  211.47
  13  17  -3  116.32  128.62
 -13 -17  -2  -88.28  216.28
  13  17  -2  -34.11  148.23
  13  17  -2  124.60  122.78
  13 -17   2   41.81  165.38
  13 -17   2   67.77  216.83
  13  17  -1   86.82  233.65
  13 -17   1  -45.20  232.69
  13  17  -1  124.23  230.37
  13 -17   1  -24.32  230.63
 -13 -17  -1 -171.45  228.31
 -13 -17   0 -134.98  141.10
  13 -16  12  -77.73  202.18
 -13 -16 -12   44.43  204.75
  13  16 -12  -76.78  202.33
  13  16 -12  -25.24  202.59
  13 -16  11  -12.88  231.30
  13  16 -11   11.20  231.50
 -13 -16 -11   15.11  233.87
  13  16 -11 -143.44  231.92
 -13 -16 -10 -218.23  218.98
  13  16 -10   53.44  217.78
  13  16 -10 -122.88  217.40
  13 -16  10    8.07  217.11
 -13 -16  -9 -149.18  204.42
  13  16  -9    2.42  204.00
  13  16  -9  -51.23  203.73
  13 -16   9  145.69  203.33
 -13 -16  -8  165.13  204.33
  13  16  -8  -68.00  193.81
  13 -16   8  -20.58  229.05
  13  16  -8  -10.45  118.75
 -13 -16  -7    5.96  191.42
  13  16  -7  110.98  192.45
  13  16  -7  -88.27  192.47
  13 -16   7  -25.30  191.88
  13  16  -6  -77.79  206.15
 -13 -16  -6   47.09  204.35
  13 -16   6 -103.38  205.64
 -13 -16  -6 -102.42  203.37
  13 -16   6  -35.33  204.96
  13  16  -6  -55.22  206.22
  13  16  -5  147.91  181.93
  13  16  -5   26.03  184.50
  13 -16   5 -137.80  184.19
  13 -16   5  -59.79  183.41
  13  16  -5  102.04  184.52
 -13 -16  -5 -168.44  182.37
  13  16  -4  125.56  204.41
  13  16  -4 -277.32  206.70
  13 -16   4   38.51  205.42
 -13  16   4 -187.05  206.43
 -13 -16  -4  -63.71  202.93
  13 -16   4 -490.75  206.53
 -13 -16  -4  -87.85  203.82
  13  16  -4  -19.35  206.42
 -13  16   3   45.65  150.99
 -13 -16  -3  129.28  215.91
  13 -16   3   30.84  178.17
 -13 -16  -3  -30.30  132.35
 -13  16   3  345.08  332.44
  13 -16   3   -9.83  219.22
  13  16  -3  -98.10  120.59
 -13 -16  -2  633.20  234.88
  13  16  -2   49.93  120.17
 -13  16   2   25.15  330.35
  13 -16   2    4.88  201.28
  13 -16   2   61.25  176.87
  13  16  -2   14.44  131.00
 -13 -16  -1  287.78  217.87
  13  16  -1  141.61  123.31
  13 -16   1   92.56  203.87
  13 -16   1  430.94  188.19
  13  16  -1  168.48  142.92
 -13 -16   0  354.08  292.98
  13  15 -13  360.99  139.62
  13  15 -13  -76.20  211.27
 -13 -15 -13  -45.09  203.76
  13 -15  13  -53.35  258.38
 -13 -15 -12 -110.62  195.29
  13 -15  12  125.51  237.79
  13  15 -12  196.64  214.25
  13  15 -12   47.56  126.55
  13 -15  11   -6.38  227.16
 -13 -15 -11  -30.97  229.44
  13  15 -11  -99.28  227.22
  13  15 -11  125.06  227.61
 -13 -15 -10  104.91  210.08
  13 -15  10 -131.32  208.52
  13  15 -10  -45.48  208.67
  13  15 -10    1.49  209.02
  13  15  -9   64.18  204.45
  13 -15   9   13.94  219.94
 -13 -15  -9  513.68  203.71
  13  15  -9  -86.46  124.68
 -13 -15  -8  861.81  203.34
  13 -15   8  660.47  236.21
  13  15  -8  398.69  136.03
  13  15  -8  619.50  209.41
  13 -15   7  206.36  156.70
  13  15  -7  150.94  185.40
  13  15  -7  113.04  122.09
  13 -15   7  133.58  243.93
 -13  15   7  478.52  340.25
 -13 -15  -7  687.67  230.95
 -13 -15  -6 1134.07  264.49
  13  15  -6 1274.35  262.36
  13 -15   6 1405.53  281.35
  13 -15   6 1171.39  190.39
  13  15  -6 1023.27  149.87
 -13 -15  -5  487.79  221.60
  13 -15   5  256.22  229.17
  13  15  -5  332.55  203.93
 -13 -15  -5  163.70  138.32
  13  15  -5   54.50  127.68
  13 -15   5 -123.17  164.60
  13  15  -5   51.77  119.45
  13  15  -4  462.86  147.38
  13  15  -4  655.68  141.78
  13 -15   4  609.33  182.54
  13 -15   4  942.39  275.47
 -13 -15  -4 1167.32  261.58
 -13 -15  -4  765.34  154.09
 -13 -15  -3  248.55  202.75
  13  15  -3  311.98  137.41
  13 -15   3  235.12  219.87
  13  15  -3   51.95  139.05
  13 -15   3  -39.74  155.87
 -13  15   3  694.82  312.55
 -13 -15  -3  369.05  143.97
  13 -15   2  208.89  179.34
 -13 -15  -2  660.87  240.77
  13  15  -2   -1.96  116.26
  13  15  -2  206.61  134.21
  13 -15   2  243.25  233.83
 -13  15   2  858.63  372.03
  13  15  -1  166.39  142.76
  13  15  -1  200.42  125.74
 -13 -15  -1  489.01  240.09
  13 -15   1  315.99  211.33
  13 -15   1  182.13  183.54
 -13 -15   0  351.26  235.05
 -13  15   0  127.50  143.06
  13  14 -14  152.41  234.18
  13  14 -14  -45.56  125.75
  13 -14  14    6.35  249.26
 -13 -14 -14   59.12  194.83
 -13 -14 -13  115.99  213.36
  13  14 -13  109.31  124.58
  13 -14  13  458.22  266.57
  13  14 -13  268.80  231.38
  13  14 -12  152.47  206.67
  13 -14  12 -260.32  206.71
  13  14 -12   84.91  206.84
 -13 -14 -12  -49.49  208.88
  13  14 -11  305.06  198.96
 -13 -14 -11  166.74  215.62
  13  14 -11   66.57  123.82
  13 -14  11  227.57  240.89
  13  14 -10    3.39  122.65
  13 -14  10  112.89  226.84
  13  14 -10   81.49  203.76
 -13 -14 -10  330.66  186.93
  13 -14   9  194.79  225.43
  13  14  -9  140.27  217.65
 -13 -14  -9  -38.82  204.33
  13  14  -9   95.89  126.21
  13  14  -8   -3.46  199.68
 -13 -14  -8  313.63  191.86
  13 -14   8  -44.72  237.52
 -13  14   8  530.94  298.41
  13  14  -8  159.20  118.82
  13 -14   7   -0.93  206.00
  13  14  -7  -13.43  207.41
 -13  14   7   -6.90  208.14
  13  14  -7    6.87  207.29
 -13 -14  -7 -103.86  206.02
  13 -14   7 -100.10  207.01
  13 -14   6  203.88  204.84
  13 -14   6  575.63  149.32
  13  14  -6  108.87  122.81
 -13  14   6  279.89  311.11
 -13 -14  -6  141.90  212.19
  13  14  -6  197.85  188.50
  13  14  -6  270.39  120.00
  13 -14   5  205.87  247.65
  13  14  -5  -62.66  123.62
  13  14  -5   23.76  118.41
  13 -14   5   96.66  167.40
 -13  14   5 -127.43  297.85
 -13 -14  -5  -73.87  186.72
  13 -14   4  475.69  215.34
 -13 -14  -4  365.73  216.14
  13 -14   4  123.14  172.46
 -13  14   4  196.72  303.88
  13  14  -4   94.17  133.97
  13  14  -4  210.52  120.71
  13 -14   3  412.17  174.42
  13 -14   3  650.94  219.47
  13  14  -3  275.27  135.04
 -13 -14  -3  505.01  135.61
 -13 -14  -3  314.04  217.26
 -13  14   3  698.29  311.29
  13  14  -3  383.82  128.28
 -13  14   2  562.78  347.67
  13 -14   2  269.42  245.38
 -13 -14  -2  129.03  124.75
  13  14  -2  125.54  120.08
  13  14  -2  140.46  121.96
 -13  14   2  606.92  161.24
  13 -14   1 1301.83  225.36
  13 -14   1 1374.79  271.26
 -13 -14  -1 1118.99  262.05
 -13  14   1 1687.22  210.09
  13  14  -1  984.07  141.77
  13  14  -1  994.22  162.77
 -13  14   0   92.90  172.29
 -13 -14   0  594.29  236.01
  13  13 -15  -84.65  191.35
  13  13 -15  -93.58  190.31
  13 -13  15   47.81  190.95
  13  13 -14   80.79  206.59
  13  13 -14  168.21  121.11
  13 -13  14  -51.35  229.96
 -13 -13 -14 -100.08  184.96
  13  13 -13   -6.69  204.77
 -13 -13 -13  257.30  198.10
  13  13 -13   56.63  123.81
  13 -13  12   14.19  216.71
  13  13 -12 -163.43  216.59
  13  13 -12  110.88  216.71
 -13 -13 -12  -50.43  218.72
  13  13 -11  -20.01  121.54
  13 -13  11  361.73  257.34
  13  13 -11 -180.56  212.34
 -13 -13 -11   38.47  244.68
  13  13 -10   40.47  130.61
  13  13 -10  256.62  195.92
 -13 -13 -10  208.24  200.96
  13 -13  10  165.47  214.90
  13  13  -9   52.67  187.42
  13  13  -9  197.35  123.09
  13 -13   9  214.47  225.46
 -13 -13  -9 -186.85  197.14
  13 -13   8  115.34  235.23
 -13 -13  -8  180.68  205.11
  13  13  -8  251.12  116.91
  13  13  -8  222.79  171.94
 -13  13   8  670.06  330.96
  13 -13   7  203.46  230.58
 -13  13   7  255.74  327.66
  13  13  -7  455.87  185.82
 -13 -13  -7  254.52  215.67
  13  13  -7  -47.40  114.03
  13 -13   7  257.77  152.17
  13 -13   6  121.82  167.42
  13  13  -6  -10.24  123.34
 -13 -13  -6  228.73  189.41
  13  13  -6  134.65  158.64
 -13  13   6  311.43  294.32
  13 -13   6  136.67  228.22
  13  13  -6   16.07  115.13
  13 -13   5  -91.45  209.41
 -13 -13  -5  -89.74  206.62
 -13  13   5  248.15  210.07
  13  13  -5 -148.54  209.16
  13  13  -5  -67.38  205.26
  13 -13   5 -105.00  208.25
 -13 -13  -4   96.53  202.56
  13 -13   4   97.95  158.59
  13  13  -4   29.79  131.94
 -13  13   4  434.37  357.13
  13  13  -4  -65.22  119.73
  13 -13   4  142.82  203.07
  13  13  -3  136.37  133.05
  13 -13   3  -93.47  174.00
  13 -13   3  185.25  201.94
  13  13  -3   16.14  117.63
 -13 -13  -3  100.70  243.13
 -13  13   3   35.13  316.80
 -13  13   3  110.50  151.15
 -13 -13  -2   77.87  222.15
  13  13  -2 -116.80  223.44
  13 -13   2 -237.63  226.70
 -13 -13  -2  -48.27  221.71
 -13  13   2 -228.87  227.00
  13 -13   2   61.60  224.99
 -13  13   2   -1.09  224.98
  13  13  -2  126.84  222.29
  13 -13   1   98.56  230.36
 -13 -13  -1    4.50  227.55
  13  13  -1  -91.97  228.00
 -13  13   1 -554.40  232.58
  13 -13   1  -30.13  232.43
  13  13  -1 -104.83  228.01
 -13  13   0   -7.15  139.77
 -13 -13   0  -33.98  138.60
  13  12 -16  308.72  184.94
  13 -12  16 -134.49  185.91
  13  12 -16 -191.24  186.48
  13  12 -15 -123.01  164.20
 -13 -12 -15   25.29  165.73
  13  12 -15   12.41  165.22
  13 -12  15   -8.16  164.80
  13  12 -14  -73.74  223.99
  13  12 -14  -14.08  224.84
  13 -12  14    3.58  224.53
  13  12 -13  -79.79  193.48
  13  12 -13 -110.80  193.78
 -13 -12 -13 -102.90  195.39
  13  12 -12    1.51  188.83
  13 -12  12 -149.44  235.27
  13  12 -12   84.04  114.75
 -13 -12 -12  129.33  230.87
  13  12 -11  215.44  194.28
 -13 -12 -11  102.48  203.57
  13  12 -11  108.08  124.34
 -13  12  11  255.77  314.90
 -13 -12 -10  229.45  205.37
  13  12 -10  111.35  129.35
  13 -12  10  -59.57  254.67
  13  12 -10  140.74  188.52
 -13 -12  -9  534.35  200.18
  13  12  -9  289.20  121.03
  13  12  -9  226.60  173.76
  13 -12   9  166.43  226.87
  13  12  -8   50.63  114.03
  13 -12   8   11.89  213.96
 -13 -12  -8  554.28  182.03
  13  12  -8  160.80  189.60
 -13  12   8  683.17  316.26
 -13  12   7  212.39  297.86
  13  12  -7  245.69  181.78
  13 -12   7   83.13  214.42
 -13 -12  -7  168.53  198.06
  13  12  -7  152.99  120.16
 -13 -12  -6  540.96  212.88
  13 -12   6  236.36  156.85
  13  12  -6   93.14  120.60
 -13  12   6  562.76  300.54
  13 -12   6  115.15  218.91
  13  12  -6  145.19  123.45
  13 -12   5  169.38  160.16
  13  12  -5   25.00  126.72
 -13  12   5  345.81  328.97
  13 -12   5  538.19  243.72
  13  12  -5  292.07  130.86
 -13 -12  -5  783.67  208.21
  13 -12   4  580.31  162.58
  13  12  -4  503.95  134.14
  13  12  -4  439.09  131.64
 -13 -12  -4  878.40  219.50
  13 -12   4  869.94  249.07
  13  12  -3  461.52  130.73
  13 -12   3  763.93  238.73
 -13  12   3 1239.51  360.38
 -13 -12  -3  783.39  259.17
  13 -12   3  777.30  196.27
  13  12  -3  389.32  137.58
 -13  12   3  922.93  201.16
  13  12  -2  680.08  144.39
  13  12  -2  515.71  134.08
 -13 -12  -2 1109.28  261.48
  13 -12   2 1262.66  233.12
 -13  12   2 1283.46  342.59
  13 -12   2  722.22  184.95
  13  12  -1  844.67  145.21
 -13 -12  -1  802.52  143.00
  13 -12   1  893.83  196.06
 -13  12   1 1590.39  355.11
  13  12  -1  802.70  146.78
 -13  12   1 1223.44  191.60
 -13 -12  -1 1299.70  280.38
  13 -12   1 1294.52  227.92
 -13  12   0 1287.34  210.73
 -13 -12   0 1192.15  291.48
  13 -11  17 -159.76  198.25
  13  11 -17   79.69  196.91
  13  11 -17   45.90  198.99
  13 -11  16   44.82  264.83
  13  11 -16  197.12  112.69
  13  11 -16  191.44  203.85
  13  11 -15  249.07  191.86
  13  11 -15  324.98  112.67
  13 -11  15  363.02  272.21
  13  11 -14  -36.71  120.44
  13 -11  14  319.62  274.98
  13  11 -14  182.18  202.58
  13  11 -13  141.19  190.49
 -13  11  13  314.91  251.13
  13  11 -13  138.51  113.25
  13 -11  12  416.67  245.76
 -13 -11 -12  165.96  210.42
  13  11 -12  378.21  179.68
  13  11 -12   81.59  119.01
  13  11 -11 -142.22  184.81
  13  11 -11   13.16  113.67
  13 -11  11  -64.54  256.86
 -13 -11 -11  249.87  208.86
  13  11 -10  367.01  192.74
  13  11 -10  315.11  125.90
  13 -11  10  272.15  245.99
 -13 -11 -10  541.54  202.40
  13  11  -9  104.34  159.06
  13  11  -9   64.64  123.22
 -13  11   9  533.04  299.57
 -13 -11  -9  623.51  206.58
  13 -11   9   -9.25  224.60
  13 -11   8  574.07  236.22
 -13 -11  -8  538.46  196.26
 -13  11   8  484.30  319.77
  13  11  -8  349.36  123.11
  13  11  -8  453.72  177.20
  13  11  -7  193.98  158.08
 -13  11   7  215.98  288.90
 -13 -11  -7  379.81  197.09
  13  11  -7  297.11  127.40
  13 -11   7  498.09  230.68
 -13  11   6  667.62  303.70
  13 -11   6  145.16  202.18
  13  11  -6  162.55  118.46
  13  11  -6  269.41  119.57
 -13 -11  -6  633.80  196.31
 -13 -11  -5  840.60  238.85
  13 -11   5  714.39  245.95
  13  11  -5  416.99  131.10
  13  11  -5  483.70  123.73
  13 -11   5  310.85  168.04
 -13  11   5 1147.30  339.32
  13  11  -4  453.94  136.17
  13  11  -4  527.09  131.00
 -13  11   4 1461.91  349.95
 -13  11   4  814.42  183.85
  13 -11   4  550.54  159.48
 -13 -11  -4 1045.51  249.17
  13 -11   4  506.48  231.24
  13 -11   3 1158.84  174.30
 -13  11   3 2022.42  377.82
 -13 -11  -3 1189.32  251.83
  13  11  -3  621.58  140.47
 -13  11   3 1426.79  189.96
 -13  11   3 1073.52  109.54
  13 -11   3 1333.81  274.93
  13  11  -3  867.24  127.96
  13  11  -2  521.56  119.27
  13 -11   2  594.25  242.79
  13  11  -2  358.11  146.27
 -13 -11  -2  648.17  245.11
 -13  11   2 1023.01  331.95
  13 -11   2  644.15  192.34
  13  11  -1  350.63  145.15
 -13 -11  -1 1101.07  228.61
 -13  11   1 1184.90  353.77
 -13  11   1  806.92  176.42
  13 -11   1  500.00  185.61
 -13 -11   0 1143.33  280.33
 -13  11   0 1402.30  229.96
  13  10 -17  121.48  124.71
  13 -10  17  131.83  239.91
  13  10 -17   -6.68  195.57
  13 -10  16   51.76  197.19
  13  10 -16 -245.88  198.12
  13  10 -16 -119.90  196.24
  13 -10  15  138.72  174.07
  13  10 -15  -58.35  174.75
  13  10 -15   60.87  173.45
  13 -10  14 -232.29  243.80
 -13 -10 -14  208.96  162.92
  13  10 -14  -11.18  190.74
  13  10 -14   51.54  117.73
  13 -10  13 -250.98  177.03
  13  10 -13  -83.05  177.16
  13  10 -13  -52.88  176.69
 -13 -10 -13  -13.01  178.11
  13  10 -12  115.90  113.96
  13  10 -12    7.73  193.57
  13 -10  12  -27.87  223.10
 -13 -10 -12  238.19  201.58
  13 -10  11 -377.45  235.32
 -13 -10 -11   62.24  204.69
  13  10 -11  126.19  116.28
 -13  10  11  612.13  280.27
  13  10 -11  115.65  183.17
 -13  10  10  580.63  290.13
 -13 -10 -10  248.98  207.88
  13  10 -10  203.62  188.81
  13  10 -10   66.90  120.67
  13 -10  10  144.19  213.37
 -13  10   9 -139.86  198.83
 -13 -10  -9  -38.68  198.89
  13  10  -9   83.95  198.98
  13  10  -9   55.34  198.95
  13 -10   9 -220.40  199.28
  13 -10   8   65.00  221.23
  13  10  -8  418.26  177.21
 -13 -10  -8  -58.78  183.34
  13  10  -8   63.48  125.34
 -13  10   8   32.03  307.45
 -13 -10  -7 -272.53  176.75
  13  10  -7   39.61  111.93
  13  10  -7   56.19   96.54
 -13  10   7  257.36  307.21
  13 -10   6 -237.64  200.96
 -13 -10  -6 -101.41  198.40
 -13  10   6  -13.19  200.71
  13  10  -6   54.96  200.57
  13  10  -6    9.19  198.41
 -13 -10  -5  161.31  197.32
  13  10  -5   68.05  119.34
  13  10  -5  277.40  104.57
  13 -10   5  108.75  217.48
 -13  10   5  276.25  176.33
  13 -10   4 -116.29  210.74
  13  10  -4   29.12  103.01
 -13  10   4   32.30  286.64
 -13 -10  -4  422.63  203.14
  13  10  -4   24.46  125.11
 -13  10   4   47.45  157.21
  13 -10   4  300.53  148.42
  13 -10   3   80.21  226.32
 -13  10   3   72.68  226.36
 -13  10   3 -230.38  227.69
  13  10  -3  -14.71  224.23
  13  10  -3   35.03  224.19
  13 -10   3   39.18  227.82
 -13 -10  -3    1.57  223.45
  13  10  -2 -165.56  226.60
  13  10  -2   -8.42  227.80
 -13  10   2  232.38  231.34
 -13 -10  -2  -17.92  226.85
  13 -10   2   60.07  231.43
  13 -10   2 -189.45  229.97
 -13  10   2  -15.12  229.26
  13 -10   1  180.19  157.44
 -13 -10  -1    7.89  217.74
 -13  10   1  143.52  158.26
  13  10  -1 -135.33  129.31
 -13  10   1   88.32  259.64
 -13  10   0   37.01   97.08
 -13  10   0  178.62  164.63
 -13 -10   0   97.80  234.60
  13  -9  18   98.47  206.97
  13   9 -18 -194.09  207.73
  13   9 -18  -93.46  205.55
  13  -9  17 -224.27  205.98
  13   9 -17  206.07  204.85
  13   9 -17  -35.79  207.07
  13   9 -16   26.25  134.01
 -13  -9 -16  -49.51  134.53
  13   9 -16    2.08  135.35
  13  -9  16  -10.88  134.58
  13   9 -15   -9.78  194.74
  13   9 -15  -23.68  193.18
  13   9 -14  -77.14  163.42
 -13  -9 -14   97.54  146.21
  13   9 -14  186.49  124.52
  13  -9  13  -74.56  178.36
  13   9 -13  -17.33  178.00
 -13  -9 -13  136.47  179.24
  13   9 -13 -113.20  178.59
 -13   9  12  651.89  273.41
  13   9 -12  304.08  194.84
  13   9 -12  128.46  100.91
 -13  -9 -12  300.92  195.80
  13   9 -11   84.00  171.60
  13   9 -11  -20.54  115.27
  13  -9  11  200.38  213.63
 -13  -9 -11   69.58  217.25
 -13  -9 -10   30.58  188.03
  13  -9  10   30.94  209.66
  13   9 -10  101.53  123.57
  13   9 -10 -139.78  180.92
  13   9  -9   44.49  122.02
 -13  -9  -9  267.08  192.79
  13   9  -9  157.60  168.16
  13  -9   9  197.70  201.40
 -13   9   9  222.68  305.21
  13   9  -8  -93.11  164.12
  13   9  -8  -17.75  111.51
 -13  -9  -8  284.64  181.98
 -13   9   8  236.48  282.14
  13  -9   8   39.45  214.16
 -13   9   7  462.81  290.48
 -13  -9  -7  611.02  184.34
  13  -9   7  -18.80  188.47
  13   9  -7  239.02  110.12
 -13  -9  -6  234.62  184.33
  13  -9   6 -104.64  171.50
 -13   9   6 -212.00  291.33
  13   9  -6    8.82  102.32
  13   9  -6   85.42  103.62
 -13  -9  -5  326.15  200.98
  13   9  -5   49.20   98.83
  13  -9   5  178.00  191.75
 -13   9   5  273.58  276.54
  13   9  -5   81.61  114.80
 -13   9   5  177.58  161.95
  13   9  -4  182.41   93.90
  13  -9   4  231.83  187.80
 -13  -9  -4  552.11  206.91
 -13   9   4  541.92  163.97
 -13   9   4  706.24  307.35
  13  -9   3  502.75  206.93
 -13  -9  -3  484.16  217.32
 -13   9   3  783.19  281.91
  13   9  -3  192.95   89.63
 -13   9   3  631.27  163.54
  13   9  -3   52.19  122.69
 -13   9   2 1403.43  350.79
 -13  -9  -2 1411.23  241.93
  13   9  -2  793.31  158.88
  13  -9   2  931.49  178.62
 -13   9   2 1354.04  192.31
 -13   9   1  414.43  174.01
  13  -9   1  341.87  158.10
  13   9  -1   67.92  135.21
 -13  -9  -1  625.51  243.35
 -13   9   1  463.00  273.30
 -13   9   0 1688.43  205.58
 -13   9   0 1971.29  353.44
 -13  -9   0 1343.16  299.92
  13   8 -18    1.39  130.32
  13  -8  18  172.96  233.02
  13   8 -18    6.97  198.07
  13   8 -17   73.55  201.79
  13   8 -17 -221.41  199.70
  13   8 -16   35.74  181.18
 -13  -8 -16   55.05  136.48
  13  -8  16   15.23  221.38
  13   8 -16   61.02  118.96
  13   8 -15   22.48  199.38
  13  -8  15  254.98  222.92
  13   8 -15   24.19  112.97
  13   8 -14  187.52  197.26
  13  -8  14  -23.62  213.36
  13   8 -14   -8.33  115.83
  13  -8  13 -172.21  180.48
  13   8 -13  -23.38  180.81
  13   8 -13 -142.11  180.12
  13   8 -12   92.16  112.51
  13   8 -12  167.13  184.03
  13  -8  12 -134.98  202.52
 -13  -8 -11  129.80  209.60
  13   8 -11 -202.26  167.43
  13   8 -11   76.50  119.44
  13  -8  11  110.53  197.03
  13   8 -10 -114.37  196.29
 -13  -8 -10  -23.57  196.60
  13  -8  10  147.16  196.76
  13   8 -10   69.17  196.23
 -13  -8  -9  394.09  171.82
  13   8  -9  264.82  115.00
  13  -8   9  267.56  210.01
  13   8  -9   96.00  163.31
  13   8  -8 -105.75  104.77
  13   8  -8    6.32  150.43
  13  -8   8  134.09  195.22
 -13  -8  -8  665.93  188.94
  13   8  -7  797.79  117.84
  13   8  -7  778.56  109.51
  13   8  -7  807.03  196.95
 -13  -8  -7 1342.56  220.14
  13  -8   7  767.89  216.94
 -13   8   7 1514.64  314.57
  13  -8   6   59.54  194.17
 -13  -8  -6  448.38  199.60
  13   8  -6   41.02   90.68
 -13   8   6  303.70  283.84
 -13   8   5 1981.21  352.88
  13   8  -5 1010.81  108.77
 -13  -8  -5 1651.81  300.62
  13  -8   5 1101.18  257.92
  13   8  -4   94.83   78.57
 -13   8   4  199.12  158.20
  13  -8   4   96.09  197.39
 -13   8   4  447.08  273.67
 -13  -8  -4  454.83  215.57
  13  -8   3  397.96  196.62
 -13  -8  -3  683.79  225.19
 -13   8   3  926.36  305.05
 -13   8   3  910.11  160.23
  13   8  -3  496.34   84.90
  13   8  -2  601.65  145.57
  13  -8   2  686.79  173.61
 -13   8   2  974.11  183.44
 -13   8   2  918.19  313.01
 -13  -8  -2  646.35  261.70
  13   8  -1  265.06  121.02
 -13   8   1  483.54  271.36
  13  -8   1  362.31  148.94
 -13  -8  -1  272.96  235.90
 -13   8   1  242.63  167.61
 -13  -8   0 1380.06  249.89
 -13   8   0 1773.61  337.15
 -13   8   0 1500.53  201.28
  13   7 -19  -59.23  198.39
  13  -7  19 -211.48  198.24
  13   7 -19   39.15  197.28
  13   7 -18 -114.88  205.48
  13  -7  18  116.08  206.25
  13   7 -18  -87.26  207.19
  13   7 -17 -110.94  199.98
  13  -7  17   84.29  200.55
  13   7 -17  -49.39  201.90
  13  -7  16  127.83  200.56
  13   7 -16  -55.26  202.05
  13   7 -16 -128.89  200.12
 -13  -7 -15 -277.36  126.38
  13   7 -15 -200.70  126.05
  13   7 -15  -18.42  127.13
 -13  -7 -14  -76.11  123.84
  13   7 -14  106.78  123.35
  13   7 -14  -32.06  124.18
  13   7 -13  -92.86  198.19
  13   7 -13  154.37  197.29
  13  -7  13 -121.44  197.65
  13   7 -12   71.31  173.62
 -13   7  12   16.59  229.25
  13   7 -12  115.26  109.36
  13  -7  12 -171.60  188.54
  13  -7  11   13.76  180.05
  13   7 -11  -59.06  179.79
  13   7 -11  124.78  179.58
  13  -7  10  288.32  181.83
  13   7 -10  170.88  179.26
  13   7 -10   98.40  112.20
  13   7  -9  -10.55  167.58
 -13  -7  -9  301.46  199.24
  13   7  -9   94.39  104.41
  13  -7   9  147.66  184.96
  13   7  -8  104.60  160.96
 -13  -7  -8   14.01  192.21
  13   7  -8  -16.73   94.06
 -13   7   8  200.61  262.66
  13  -7   7  -13.15  157.86
 -13  -7  -7  360.67  195.82
  13   7  -7  125.84  150.31
  13   7  -7    3.11   88.08
 -13   7   7  188.11  267.18
 -13   7   6  192.63  190.27
  13   7  -6  -45.17  190.62
 -13  -7  -6   97.85  188.93
  13   7  -6   60.26  190.25
  13  -7   6 -152.92  191.53
  13   7  -5  137.35  150.62
 -13   7   5  223.46  254.17
 -13   7   5  -58.58  154.13
 -13  -7  -5  272.46  193.56
  13   7  -5  116.95   76.47
  13  -7   5  -41.18  172.45
 -13  -7  -4   -7.09  198.44
 -13   7   4  257.34  153.16
  13   7  -4   91.06  146.78
 -13   7   4  336.77  257.67
  13  -7   4  249.75  164.05
 -13  -7  -3  161.94  210.29
  13   7  -3  401.20  147.87
 -13   7   3  125.38  148.28
 -13   7   3   91.53  244.64
  13  -7   3 -113.39  155.24
 -13  -7  -2  779.04  204.77
 -13   7   2  750.07  277.04
 -13   7   2  842.39  162.89
 -13  -7  -1  140.19  230.29
 -13   7   1   69.88  259.99
 -13   7   1  128.47  142.79
  13  -7   1   37.88  163.40
 -13   7   0 1102.37  179.86
 -13   7   0 1003.25  288.47
 -13  -7   0  874.32  260.40
  13   6 -19   95.00  207.62
  13  -6  19   69.47  223.08
  13   6 -19  111.64  114.64
  13   6 -18   33.37  121.67
  13   6 -18  101.18  200.55
  13  -6  18  -14.45  208.67
  13   6 -17   47.56  189.54
  13   6 -17 -271.45  187.99
  13   6 -16  146.51  126.54
  13   6 -16  449.82  281.63
 -13   6  15  -93.25  198.91
  13   6 -15  -61.01  202.47
  13   6 -15 -102.64  204.19
  13   6 -14   12.51  138.95
 -13  -6 -14 -155.46  138.31
  13   6 -14 -441.22  137.97
  13  -6  13   54.04  185.35
  13   6 -13  -36.90  113.66
  13   6 -13  184.43  192.40
  13   6 -12  -62.13  163.01
 -13  -6 -12  102.03  171.79
  13   6 -12   57.39  109.00
  13   6 -11   43.15  102.50
 -13  -6 -11  196.27  185.48
  13  -6  11   60.77  166.96
  13   6 -11    7.90  166.92
  13   6 -10  -23.12  105.24
  13  -6  10   26.92  175.35
  13   6 -10  146.78  164.54
 -13  -6 -10   -9.74  190.51
  13   6  -9 -106.31  169.70
  13   6  -9  -11.11   98.07
 -13  -6  -9  192.81  199.86
  13  -6   9   56.95  158.62
  13   6  -8  108.35  164.32
  13   6  -8   -7.07   88.67
  13  -6   8  205.09  158.25
 -13  -6  -7  454.94  191.96
  13   6  -7  331.88   79.46
  13  -6   7  331.54  164.67
  13   6  -7  212.49  144.12
 -13  -6  -7  206.83  146.99
 -13  -6  -6   72.28  143.77
  13   6  -6   63.43  152.79
  13  -6   6 -149.13  152.89
 -13  -6  -6  389.89  185.90
 -13   6   6  140.29  256.18
  13   6  -6   28.07   70.38
 -13  -6  -5  694.00  199.34
  13  -6   5  541.55  172.34
 -13   6   5  767.29  296.10
  13   6  -5  505.08  117.30
  13  -6   4   84.34  201.82
  13   6  -4 -175.49  200.70
 -13   6   4  -11.88  201.12
 -13   6   4   46.50  200.79
 -13  -6  -4  -45.31  198.69
 -13  -6  -3  147.90  200.29
 -13   6   3  179.88  250.87
 -13   6   3  174.21  145.87
  13   6  -3  165.20  116.15
  13   6  -2   -4.25  127.43
 -13  -6  -2  369.35  216.56
 -13   6   2  266.72  147.32
 -13   6   2  -80.39  249.59
 -13   6   1  132.95  244.82
  13   6  -1   45.21  128.53
 -13   6   1  -25.39  144.61
 -13  -6  -1  195.45  239.39
 -13  -6   0  167.52  234.72
 -13   6   0  567.79  142.44
 -13   6   0  608.04  265.54
  13   5 -19  334.01  223.56
  13  -5  19  297.31  203.68
  13   5 -19  -18.69  114.33
  13   5 -18   53.30  222.30
  13   5 -18  181.26  127.93
  13   5 -17   86.49  120.44
  13  -5  17   71.83  192.92
  13   5 -17   99.83  211.24
  13  -5  16  264.55  245.99
  13   5 -16   36.50  115.87
  13   5 -16  -59.35  185.35
  13   5 -15  -21.17  114.12
  13   5 -15   79.19  193.99
  13   5 -14  -88.51  179.51
  13   5 -14  117.46  180.83
  13  -5  14 -124.92  179.59
  13   5 -13  -16.08  164.09
  13   5 -13   47.01  118.39
  13  -5  13 -112.84  163.47
 -13   5  13  112.76  221.84
  13   5 -12  130.39  113.05
  13  -5  12  252.41  173.01
  13   5 -12   76.89  175.18
  13   5 -11   26.79  175.76
 -13   5  11 -260.07  173.02
  13  -5  11  -81.36  175.75
  13   5 -11  -22.04  175.23
  13  -5  10   55.29  157.49
  13   5 -10  201.21   98.04
  13   5 -10  240.79  170.77
  13  -5   9  649.48  179.36
 -13  -5  -9  692.94  179.56
 -13   5   9  604.87  243.51
  13   5  -9  456.27   92.33
  13   5  -9  389.47  167.08
 -13  -5  -9  688.15  217.94
  13  -5   8  454.98  158.90
  13   5  -8  151.60   85.94
  13   5  -8  364.11  156.72
 -13  -5  -8  360.66  166.88
 -13  -5  -8  474.20  190.31
 -13  -5  -7  480.26  164.93
  13   5  -7  348.13  157.10
 -13   5   7  324.85  224.41
  13  -5   7  236.82  146.38
 -13  -5  -7  358.11  191.05
  13  -5   6 -148.13  142.30
 -13  -5  -6  188.94  180.91
  13   5  -6   44.29  140.57
  13   5  -5  617.42  162.52
 -13   5   5  823.58  156.29
 -13  -5  -5  968.07  208.90
  13  -5   5  707.18  167.12
 -13  -5  -5  573.23  178.19
 -13  -5  -4  673.34  161.98
 -13   5   4  839.75  164.41
 -13  -5  -4  682.65  223.53
  13   5  -4  625.30  176.72
 -13   5   4  755.94  252.73
 -13   5   3 1042.80  174.04
 -13  -5  -3 1015.87  238.62
 -13  -5  -3  987.17  170.25
  13   5  -3  970.72  194.84
 -13   5   3 1100.01  242.72
  13   5  -3  512.55  132.73
 -13   5   2 1887.32  201.58
 -13  -5  -2 1471.49  195.34
 -13   5   2 1790.89  302.82
 -13  -5  -2 1571.86  264.35
 -13  -5  -1  595.06  177.58
 -13  -5  -1  755.32  237.66
 -13   5   1  812.63  155.92
 -13   5   1 1213.08  253.48
  13   5  -1  404.37  122.00
 -13   5   0 1806.53  203.46
 -13   5   0 1727.26  299.79
 -13  -5   0 1720.28  264.41
  13   4 -20  -16.27  129.93
  13   4 -20  -33.37  225.38
  13  -4  20   97.90  195.50
  13   4 -19  155.19  231.45
  13  -4  19  279.23  212.56
  13   4 -18  128.72  123.62
  13   4 -18   33.26  238.38
  13  -4  18   15.46  194.53
  13   4 -17  -42.38  199.90
  13   4 -17 -128.45  199.09
  13  -4  17   10.61  198.52
  13   4 -16   38.56  218.11
  13   4 -16  134.13  117.37
  13  -4  16  -79.34  174.62
  13   4 -15  114.97  187.22
  13   4 -15   61.96  121.51
  13   4 -14  108.97  122.04
  13   4 -14   80.58  186.74
  13  -4  14  513.24  172.91
  13   4 -13    4.93  135.31
 -13  -4 -13  -41.02  134.60
  13   4 -13  -33.55  134.45
 -13  -4 -12   52.64  156.31
  13   4 -12  132.16  112.16
  13  -4  12  -17.73  163.60
  13   4 -12  318.62  189.33
  13   4 -11  223.77   94.25
  13   4 -11  392.14  192.99
  13  -4  11  302.99  169.08
 -13  -4 -11  293.70  166.49
  13   4 -10    4.78   80.80
  13   4 -10  185.43  168.83
  13  -4  10   28.63  152.11
 -13  -4 -10  229.33  171.85
 -13  -4  -9  551.65  180.99
  13  -4   9   -3.62  160.58
  13   4  -9  219.69   81.76
  13   4  -9  273.42  185.89
 -13  -4  -9  174.08  196.81
 -13   4   9  473.98  224.52
  13   4  -8   71.82  155.60
 -13  -4  -8   65.84  175.26
  13  -4   8  170.50  137.29
 -13  -4  -8  -27.51  195.00
  13  -4   7  423.22  144.92
  13   4  -7  175.40  158.51
 -13  -4  -7  335.72  181.97
 -13  -4  -7  346.38  190.23
  13  -4   6  199.17  146.53
 -13  -4  -6  263.36  178.37
 -13  -4  -6  362.97  197.21
  13   4  -6  326.77  155.21
  13   4  -5  378.69  161.40
 -13  -4  -5  380.92  164.38
 -13  -4  -5  668.11  221.41
  13  -4   5  389.95  139.87
 -13   4   5  605.84  145.79
  13   4  -4 1033.71  178.47
 -13   4   4 1198.97  170.27
 -13  -4  -4 1271.18  238.70
 -13   4   3  642.04  152.76
  13   4  -3  462.01  123.83
 -13  -4  -3  396.09  183.45
  13   4  -3  389.03  153.01
 -13  -4  -3  512.71  196.57
 -13  -4  -2  611.19  211.38
  13   4  -2  285.06  117.05
  13   4  -2  251.96  141.30
 -13   4   2  237.72  141.50
 -13  -4  -2  400.99  182.28
 -13   4   1  415.33  230.98
 -13   4   1  488.70  158.49
 -13  -4  -1  422.63  236.84
  13   4  -1  354.68  120.84
 -13  -4  -1  619.91  197.52
  13   4  -1  371.36  137.74
 -13   4   0  186.34  221.69
 -13  -4   0   30.67  195.76
 -13   4   0   91.89  210.20
 -13  -4   0  -82.43  216.66
 -13   4   0  102.65  131.34
  13  -3  20  105.04  182.06
  13   3 -20  120.96  227.26
  13   3 -19  -28.14  224.16
  13  -3  19  -20.58  224.52
  13   3 -19 -154.02  226.03
  13   3 -18  -35.69  202.50
  13   3 -17   20.43  129.16
  13   3 -17  260.95  210.29
  13   3 -16  122.96  125.39
 -13   3  16  167.94  221.91
  13   3 -16   93.56  195.71
  13  -3  15  150.95  160.01
  13   3 -15 -121.02  160.43
  13   3 -15  -45.85  161.43
  13   3 -14  -90.63  163.18
  13   3 -14  153.72  162.05
  13  -3  13  -67.44  152.65
  13   3 -13   37.26  118.52
 -13  -3 -13   75.58  121.18
  13   3 -13   72.12  157.50
  13   3 -12   -1.47  100.18
  13   3 -12   58.20  176.80
  13  -3  12   16.24  181.28
  13   3 -11  109.03  156.17
  13   3 -11  -87.96  155.35
  13  -3  11  -40.86  155.76
 -13  -3 -10  169.42  160.71
  13  -3  10    2.02  143.03
 -13   3  10  145.04  214.85
  13   3 -10  301.66  158.31
  13   3 -10  145.75   77.42
  13  -3   9  180.36  177.88
  13  -3   9   99.91  149.23
  13   3  -9   82.47  153.43
  13   3  -8  351.85  141.96
 -13   3   8  260.76  191.24
  13  -3   8  193.09  141.51
 -13  -3  -8  205.42  186.40
  13  -3   8  253.53  178.40
 -13  -3  -8  381.38  196.74
  13   3  -7  185.35  145.76
 -13   3   7  562.67  221.26
  13  -3   7   96.03  140.06
 -13  -3  -7  389.49  180.92
 -13  -3  -7  468.77  191.27
  13   3  -6  391.21  172.75
 -13   3   6  787.02  192.57
 -13  -3  -6  353.82  180.65
 -13   3   6  538.58  146.55
 -13  -3  -6  532.60  199.03
  13  -3   6  213.17  142.61
  13   3  -5  690.59  161.40
 -13   3   5  663.60  214.39
 -13  -3  -5  764.49  182.55
 -13   3   5  616.65  129.43
 -13  -3  -5  733.01  227.57
  13   3  -4  315.82  146.20
 -13  -3  -4  205.46  206.17
 -13  -3  -4   42.90  185.46
 -13   3   4  433.27  141.00
 -13   3   3  574.34  136.75
 -13  -3  -3  292.97  208.65
 -13  -3  -3  647.37  202.00
  13   3  -3  507.46  151.08
 -13  -3  -2  184.26  195.22
  13   3  -2  147.78  111.15
  13   3  -2  145.20  151.89
 -13   3   2   59.05  203.85
 -13   3   2  159.76  142.85
 -13   3   2  218.63  214.77
 -13  -3  -1  202.44  202.22
 -13   3   1   75.31  226.12
  13   3  -1  140.02  135.15
 -13  -3  -1  246.04  221.96
 -13   3   1  -19.84  201.27
  13   3  -1   87.13  122.33
 -13   3   1   90.58  139.74
 -13   3   0  282.17  247.22
 -13  -3   0  192.82  233.75
 -13   3   0  394.12  208.99
 -13  -3   0  197.44  205.82
 -13   3   0  171.49  147.89
  13  -2  20   42.35  197.71
  13   2 -20 -315.54  199.89
  13   2 -19   79.09  196.42
  13   2 -19 -249.66  198.98
  13   2 -18    9.01  193.75
  13   2 -18 -160.27  192.39
  13  -2  18   75.49  192.06
  13   2 -17    8.43  183.21
  13   2 -17   56.83  133.33
  13   2 -16  100.45  120.90
  13   2 -16  -13.76  179.56
  13   2 -15  282.97  188.29
  13   2 -15  -34.30  119.05
  13  -2  15  158.32  164.69
 -13   2  14 -152.96  234.97
  13   2 -14   15.15  172.45
  13   2 -14  161.23  132.64
  13   2 -13  592.00  175.70
 -13   2  13  521.27  232.54
  13  -2  13  270.25  167.71
  13   2 -13  300.68  114.45
  13   2 -12  107.69  163.66
  13  -2  12 -134.64  163.83
  13   2 -12    4.72  164.78
  13  -2  11  307.55  156.51
  13  -2  11   88.13  148.68
  13   2 -11  171.98  131.09
  13   2 -11   52.14   88.18
  13  -2  10  114.92  170.88
 -13   2  10  724.32  253.60
  13  -2  10  324.56  155.39
  13   2 -10  221.99  143.95
  13  -2   9   -3.98  147.01
 -13  -2  -9  238.28  181.74
 -13   2   9  -88.40  202.57
  13  -2   9  -32.75  177.37
  13   2  -9  227.07  142.71
  13   2  -8  836.63  158.94
 -13  -2  -8  895.65  214.56
  13  -2   8  895.83  189.75
  13  -2   8  838.87  158.25
  13   2  -7   44.39  137.52
 -13  -2  -7   44.22  208.61
  13  -2   7   76.29  153.63
 -13   2   7   63.29  191.37
  13  -2   7  286.96  131.28
 -13  -2  -7  119.43  190.24
  13   2  -6  621.95  170.97
 -13   2   6 1055.81  248.47
  13  -2   6  762.95  156.93
 -13  -2  -6 1051.02  221.03
 -13   2   6 1060.78  139.34
 -13  -2  -6  946.70  219.37
 -13   2   5  434.60  206.08
 -13  -2  -5  321.96  183.11
 -13   2   5  452.54  140.23
  13   2  -5  -34.05  133.18
 -13  -2  -5  393.76  212.32
 -13  -2  -4  555.34  216.65
  13   2  -4  455.14  147.56
 -13  -2  -4  806.20  206.36
 -13   2   4  670.15  140.26
 -13   2   3 1467.38  169.84
 -13   2   3 1528.16  280.81
 -13  -2  -3 1399.10  199.90
 -13  -2  -3 1420.77  229.20
 -13  -2  -3 1436.76  222.03
 -13   2   3 1330.48  243.21
  13   2  -3 1089.19  179.39
 -13   2   2 1009.62  169.16
 -13   2   2  743.76  238.54
 -13  -2  -2 1008.11  238.26
  13   2  -2  704.59  158.03
 -13   2   2  485.17  267.30
 -13  -2  -2  797.74  214.74
 -13   2   1 3504.54  259.73
 -13  -2  -1 2806.64  318.05
  13   2  -1 2547.12  221.87
 -13   2   1 3081.19  348.27
  13   2  -1 2703.35  266.58
 -13   2   0 1180.45  262.28
 -13   2   0  613.48  162.05
 -13   2   0  485.05  224.74
 -13  -2   0  644.19  250.96
 -13  -2   0  617.34  208.34
  13  -1  20   31.90  196.69
  13   1 -20 -116.26  199.61
  13   1 -19  -53.87  197.72
  13   1 -18  -29.44  174.88
  13   1 -17  100.06  164.24
  13   1 -17 -110.45  163.32
  13   1 -16  104.71  171.70
  13   1 -16 -113.92  171.55
 -13   1  15   63.67  210.09
  13  -1  15  -10.44  171.87
  13   1 -15  -52.81  160.35
  13   1 -15   17.62  117.74
  13   1 -14  -29.14  175.01
  13  -1  14  133.27  157.72
  13   1 -14   90.42  127.10
  13  -1  13   30.61  151.55
  13   1 -13  -44.17  152.75
  13   1 -13  -54.33  151.71
  13   1 -12  116.18  150.63
  13   1 -12  119.32   94.35
  13  -1  12   94.34  156.33
  13  -1  12  140.17  163.72
  13   1 -11 -132.08  135.04
 -13   1  11  114.77  133.13
  13  -1  11  110.74  139.41
 -13  -1 -11  -57.30  135.30
  13  -1  10   90.55  180.56
 -13  -1 -10  140.15  163.22
 -13   1  10   39.78  197.92
  13  -1  10  -47.66  149.70
  13   1 -10  207.24  134.14
 -13  -1  -9  445.37  168.59
 -13   1   9  276.95  218.17
  13  -1   9  123.43  143.01
  13   1  -9   97.35  152.20
  13  -1   8  984.46  193.98
  13   1  -8  972.82  164.77
 -13   1   8 1058.79  233.42
  13  -1   8  580.05  155.33
 -13  -1  -8  770.74  204.40
  13   1  -7  254.94  136.53
 -13   1   7   67.27  192.88
 -13  -1  -7  537.38  212.38
  13  -1   7  190.22  163.68
  13  -1   7  364.29  132.82
 -13   1   7  489.43  116.92
 -13   1   6 1817.90  161.62
  13  -1   6 1536.96  199.37
  13   1  -6 1516.93  186.74
 -13  -1  -6 1727.12  238.54
 -13  -1  -6 1788.02  265.78
 -13   1   6 1896.23  273.39
 -13   1   5  366.44  266.83
  13   1  -5  360.58  139.08
 -13  -1  -5  609.02  227.17
 -13  -1  -5  707.81  211.42
  13  -1   5  395.38  162.03
 -13   1   5  663.99  131.49
 -13   1   5  610.05  215.39
 -13  -1  -4 1797.46  230.58
  13  -1   4 1484.49  181.57
 -13   1   4 2103.00  348.35
  13   1  -4 1418.58  184.84
 -13   1   4 1714.49  168.25
 -13   1   4 1827.86  273.19
 -13  -1  -3 1066.07  232.72
  13   1  -3  590.04  146.71
 -13  -1  -3 1012.47  225.33
 -13   1   3 1181.73  285.99
 -13   1   3 1102.23  171.11
 -13   1   2 1342.89  293.32
 -13   1   2 1152.92  225.29
 -13   1   2 1221.66  178.75
 -13  -1  -2 1242.89  236.57
  13   1  -2  942.21  182.91
 -13   1   1 3253.02  321.62
 -13   1   1 3066.47  223.69
 -13   1   1 3393.27  373.61
  13   1  -1 2742.12  266.14
 -13  -1  -1 2890.69  353.67
 -13  -1   0  763.55  237.02
 -13   1   0  693.56  228.32
 -13  -1   0  709.68  222.12
 -13   1   0  494.90  157.63
  13   0 -20  130.92  155.98
  13   0 -20 -210.16  151.58
  13   0 -19  105.33  180.23
  13   0 -19   64.56  129.78
  13   0 -18  216.35  164.78
  13   0 -17 -289.66  177.47
  13   0 -16 -136.01  170.34
  13   0 -16  180.91  171.03
  13   0 -15  189.16  142.19
  13   0 -15   33.91  121.22
  13   0 -14   -1.62  162.66
  13   0 -14  -81.51  163.29
  13   0 -13   13.75  158.95
  13   0 -12  -69.36  145.32
  13   0 -11  103.98  129.38
  13   0 -10  367.74  126.95
  13   0  -9  222.68  120.83
 -13   0  -9  334.09  179.35
  13   0  -8  202.07  132.01
 -13   0  -8  173.18  197.86
  13   0  -7   92.54  120.54
 -13   0  -7 -278.99  202.67
 -13   0  -6 -249.39  186.47
  13   0  -6   33.08  119.94
  13   0  -5 -120.43  118.11
 -13   0  -5  -69.04  117.83
 -13   0  -5  -68.83  119.20
  13   0  -4  -11.07  128.78
 -13   0  -4   99.93  130.03
 -13   0  -4 -308.86  128.56
 -13   0  -3  194.62  208.84
 -13   0  -3  148.28  176.53
  13   0  -3  166.69  118.41
  13   0  -2   24.91  126.27
 -13   0  -2 -247.95  126.37
 -13   0  -1  -24.29  216.55
  13   0  -1   -7.29  134.87
 -13   0  -1  129.98  201.53
 -13   0   0  -22.69  215.69
  12 -22   4 -256.66  170.23
  12  22  -4  130.00  127.21
  12  22  -4   22.74  125.58
 -12 -22  -4  287.70  201.61
  12  22  -4  -23.90  191.78
 -12 -22  -3   94.81  255.19
  12  22  -3  386.01  144.35
  12  22  -3  -76.75  153.53
  12 -22   3  230.11  250.40
  12  22  -3  417.21  180.19
 -12 -22  -2   11.51  228.70
  12  22  -2  149.75  161.85
  12 -22   2   94.12  205.37
 -12  22   2   51.99  188.82
  12  22  -2  277.12  144.52
 -12  22   1  224.23  159.23
 -12 -22  -1  347.59  266.18
  12  22  -1   54.07  175.41
  12  22  -1   52.06  137.54
 -12 -22   0  140.82  170.47
 -12 -21  -8   54.35  134.87
  12 -21   8   72.44  240.92
  12  21  -8  289.46  142.68
  12  21  -8   55.73  203.53
 -12 -21  -8  133.22  220.04
  12 -21   7   29.57  256.89
 -12 -21  -7   84.43  144.89
 -12 -21  -7 -126.44  217.56
  12  21  -7   21.65  193.16
  12  21  -7   13.67  144.63
  12 -21   6 -201.70  234.11
  12  21  -6  114.60  234.78
  12  21  -6  -18.68  235.01
 -12 -21  -6 -134.38  234.19
 -12 -21  -6   13.90  232.08
  12  21  -5   38.53  226.40
  12 -21   5   14.30  225.67
  12 -21   5  -43.19  224.72
 -12 -21  -5 -330.17  224.95
  12  21  -5 -143.93  226.35
 -12 -21  -5   74.65  223.62
  12 -21   4   65.14  240.28
  12  21  -4  127.76  131.91
  12  21  -4   23.05  187.68
 -12 -21  -4   27.14  229.17
  12  21  -4 -133.49  149.98
  12 -21   3  321.77  263.25
  12 -21   3   78.79  183.32
 -12 -21  -3 -220.90  247.03
  12  21  -3    9.73  150.31
  12  21  -3    0.16  129.06
  12  21  -3  -24.56  170.00
  12  21  -2  -30.49  258.39
  12 -21   2  -52.02  244.16
 -12 -21  -2   66.06  241.76
  12  21  -2   20.78  244.86
 -12  21   1  -66.57  265.28
  12 -21   1    3.03  266.78
  12  21  -1  -46.07  282.00
 -12 -21  -1    5.95  263.31
  12  21  -1 -255.26  266.73
 -12 -21   0 -128.73  144.87
 -12  21   0  -91.17  146.02
  12 -20  10   91.70  209.45
  12  20 -10 -143.36  210.70
  12  20 -10  194.90  209.82
 -12 -20 -10 -170.68  212.34
  12  20  -9  234.69  198.98
 -12 -20  -9  340.90  194.75
  12 -20   9  128.48  254.87
  12  20  -9  216.02  144.24
 -12 -20  -9   88.20  142.95
  12  20  -8  -65.63  187.79
 -12 -20  -8  199.07  204.96
 -12 -20  -8  115.38  149.05
  12 -20   8  257.36  279.08
  12  20  -8   75.24  132.67
  12  20  -7  152.52  216.94
  12  20  -7 -206.59  129.86
  12 -20   7  440.49  265.11
 -12 -20  -7 -202.51  236.28
 -12 -20  -7  141.52  141.18
  12  20  -6   27.95  201.74
  12 -20   6   68.09  200.08
  12 -20   6 -190.31  200.89
  12  20  -6 -145.99  208.23
 -12 -20  -6   17.81  200.83
 -12 -20  -6   19.37  198.88
  12  20  -6   -4.02  201.52
 -12 -20  -5  129.85  210.67
  12 -20   5  193.11  248.85
  12  20  -5 -119.44  180.96
  12 -20   5  170.55  177.26
  12  20  -5  224.94  138.09
 -12 -20  -5  176.97  147.62
  12  20  -5   80.69  135.39
 -12 -20  -4  223.27  244.38
  12  20  -4  203.20  167.56
 -12  20   4   69.26  159.45
  12  20  -4   91.91  133.20
  12 -20   4  166.02  163.24
  12  20  -3  277.88  175.13
 -12 -20  -3  306.14  250.62
  12  20  -3  541.61  198.35
  12  20  -3  279.63  136.67
 -12  20   3  130.58  167.99
  12  20  -2  100.56  152.86
 -12 -20  -2  291.75  238.72
  12  20  -2   85.67  132.80
  12  20  -1  -34.97  134.00
  12  20  -1  -30.62  157.45
 -12  20   1  154.13  164.22
  12 -20   1   31.55  177.79
 -12 -20  -1  230.87  242.72
 -12 -20   0 -349.41  148.10
  12 -19  12  -15.18  244.81
  12  19 -12  115.00  142.42
 -12 -19 -12  -28.75  125.16
  12  19 -12 -202.54  207.81
 -12 -19 -12  296.40  204.72
  12 -19  11  304.14  273.96
 -12 -19 -11  328.35  237.32
  12  19 -11   14.30  217.99
  12  19 -11   -6.21  145.93
 -12 -19 -10  188.48  150.95
  12 -19  10  810.50  257.26
  12  19 -10  564.44  197.96
 -12 -19 -10  263.86  216.98
  12  19 -10  412.69  149.16
 -12 -19  -9  295.20  222.93
  12  19  -9   34.52  131.42
 -12 -19  -9   83.04  141.22
  12  19  -9  224.61  209.11
  12 -19   9  101.49  243.98
  12  19  -8  219.00  196.23
  12  19  -8   69.63  130.38
  12 -19   8   -0.08  214.74
 -12 -19  -8  346.73  226.29
 -12 -19  -8  210.39  152.29
  12  19  -7   55.72  190.17
 -12 -19  -7  223.48  147.96
 -12 -19  -7   95.30  224.67
  12 -19   7   97.02  230.40
  12  19  -7   61.18  139.19
  12 -19   6   67.79  224.28
 -12 -19  -6   63.33  148.79
 -12 -19  -6  -38.20  211.60
  12  19  -6   38.27  122.33
  12  19  -6    8.06  135.61
  12 -19   6   71.55  156.46
  12  19  -6   14.78  168.68
  12 -19   5  266.85  235.02
  12  19  -5  -56.20  137.75
 -12 -19  -5  -51.11  148.29
  12  19  -5   48.23  170.21
  12 -19   5   -6.71  164.48
  12  19  -5   55.06  128.11
 -12 -19  -5  275.40  240.74
  12  19  -4  -34.31  145.27
 -12  19   4  513.47  174.91
 -12 -19  -4  318.64  216.00
  12 -19   4  231.11  233.02
  12  19  -4  406.89  172.96
  12 -19   4   77.65  172.29
  12  19  -4  315.16  138.85
  12  19  -3   78.12  144.38
  12 -19   3  -86.09  189.68
 -12 -19  -3  178.03  228.77
  12  19  -3    9.97  130.21
  12  19  -2  306.62  135.78
 -12  19   2  285.56  160.43
 -12 -19  -2  204.25  233.59
  12  19  -2   83.68  156.59
  12  19  -1 -131.33  164.91
 -12  19   1  237.18  162.87
 -12 -19  -1  201.84  240.51
  12  19  -1  290.23  126.57
 -12 -19   0  398.29  257.61
 -12 -18 -13  170.86  141.11
  12  18 -13   81.06  181.32
  12 -18  13   92.59  281.49
  12  18 -13  101.72  140.16
 -12 -18 -13  -42.81  189.73
  12  18 -12   -1.93  202.03
 -12 -18 -12   49.94  127.89
  12  18 -12   48.27  136.81
 -12 -18 -12  313.10  234.36
  12  18 -11  -27.62  203.26
  12 -18  11    6.36  233.96
 -12 -18 -11   81.43  140.41
  12  18 -11  -42.36  131.22
 -12 -18 -10   32.69  143.36
 -12 -18 -10 -127.03  191.24
  12  18 -10  306.71  203.53
  12 -18  10  -30.07  223.14
  12  18 -10  -43.50  136.41
  12  18  -9   -7.63  169.82
  12 -18   9   38.25  233.31
 -12 -18  -9   32.12  200.30
 -12 -18  -9   88.36  138.45
  12  18  -9  261.09  125.08
 -12 -18  -8   69.03  203.13
 -12 -18  -8   62.38  205.81
  12 -18   8  -60.45  204.60
  12  18  -8 -114.39  204.94
  12  18  -8  174.34  205.64
  12 -18   7  277.90  159.74
  12  18  -7  -29.05  125.96
  12  18  -7  100.77  120.97
 -12 -18  -7   10.57  209.34
 -12 -18  -7   31.36  138.99
  12 -18   7   67.14  221.50
  12  18  -7  -44.05  173.42
  12 -18   6  153.94  149.82
  12  18  -6  164.51  135.97
 -12 -18  -6 -140.36  222.33
  12  18  -6  108.82  173.03
 -12 -18  -6  177.04  134.95
  12  18  -6   49.43  138.25
  12 -18   6 -256.23  227.21
  12 -18   5 -212.41  219.84
  12  18  -5  -51.22  220.72
  12  18  -5  104.00  220.63
 -12 -18  -5   30.42  218.61
  12  18  -5 -125.53  223.51
  12 -18   5  -38.55  218.85
 -12 -18  -5   46.63  216.87
  12 -18   4  131.80  211.05
  12  18  -4  101.76  126.51
  12  18  -4   57.06  141.96
  12 -18   4  428.07  165.29
 -12 -18  -4  290.38  228.46
  12 -18   3  -41.02  177.95
 -12 -18  -3  237.68  229.54
  12  18  -3   50.84  130.97
  12  18  -3   32.66  135.32
 -12 -18  -2  132.01  261.08
  12  18  -2  -82.67  271.03
 -12  18   2    6.96  263.57
  12 -18   2 -261.07  263.16
  12  18  -2  -81.96  264.97
 -12 -18  -1  -70.72  238.53
  12 -18   1 -116.95  240.80
  12  18  -1  -78.37  241.86
  12  18  -1 -102.05  248.37
 -12 -18   0  296.57  248.29
 -12 -17 -14   25.92  212.96
  12  17 -14  -59.11  212.05
  12  17 -14  -22.70  211.88
 -12 -17 -14 -255.18  214.43
  12 -17  14  -89.33  211.20
 -12 -17 -13 -112.41  235.38
 -12 -17 -13 -132.81  233.42
  12  17 -13  108.17  232.27
  12  17 -13   50.94  232.55
  12 -17  13  136.27  231.66
 -12 -17 -12   42.94  227.84
  12  17 -12   37.42  126.10
  12  17 -12    7.39  221.21
  12 -17  12   54.59  260.36
 -12 -17 -12  -42.42  128.36
  12  17 -11 -125.15  212.75
 -12 -17 -11   78.81  129.40
 -12 -17 -11  265.40  200.48
  12  17 -11  -24.52  133.85
 -12 -17 -10 -307.08  202.50
  12  17 -10  148.24  201.10
  12 -17  10  -31.69  200.13
  12  17 -10   87.26  200.20
 -12 -17 -10 -120.11  200.21
 -12 -17  -9   50.85  214.45
  12  17  -9  -29.34  126.78
  12  17  -9   53.66  199.74
  12 -17   9  372.61  217.27
 -12 -17  -9  144.03  131.32
 -12 -17  -8  575.27  183.08
  12 -17   8  174.14  218.12
  12  17  -8  264.69  188.53
  12  17  -8    1.59  131.18
 -12 -17  -8   -7.26  138.90
  12  17  -7   17.07  122.89
  12  17  -7  -24.49  132.60
 -12 -17  -7  118.77  197.36
  12 -17   7   29.94  249.76
  12 -17   7  -30.59  156.84
 -12 -17  -7  -20.00  155.25
  12  17  -7  241.77  221.28
 -12 -17  -6 -129.66  151.28
  12 -17   6  156.80  158.04
  12  17  -6  -86.25  183.01
 -12 -17  -6  110.84  194.28
  12  17  -6  196.68  125.80
  12  17  -6  104.10  132.20
  12 -17   6  177.96  230.52
  12  17  -5   68.88  114.58
  12 -17   5   10.32  151.62
  12  17  -5 -210.19  165.88
 -12 -17  -5   72.26  144.10
 -12 -17  -5  238.65  219.96
  12 -17   5  172.67  240.57
  12 -17   4  462.77  205.65
 -12 -17  -4  459.12  153.45
  12  17  -4  266.72  129.49
  12  17  -4  122.29  135.62
  12 -17   4  292.88  236.26
 -12 -17  -4  583.67  248.58
  12  17  -4  512.51  183.25
 -12 -17  -3  493.16  230.68
  12  17  -3   20.50  142.63
  12 -17   3  245.10  158.10
  12  17  -3  132.26  120.48
 -12  17   3  436.18  174.68
  12  17  -2  621.93  133.00
  12  17  -2  369.09  152.79
 -12  17   2  670.11  177.54
 -12 -17  -2  734.18  250.47
  12 -17   2  760.87  175.99
  12 -17   1  123.08  166.02
 -12  17   1  570.88  182.05
  12  17  -1   76.31  128.91
  12  17  -1  132.67  156.03
 -12 -17  -1  609.33  260.38
 -12  17   0  494.23  194.39
 -12 -17   0  489.69  269.15
 -12 -16 -16 -147.96  128.90
  12 -16  16  142.15  128.10
  12  16 -16 -148.11  128.12
  12  16 -16  170.81  128.92
  12  16 -15  -13.42  210.08
  12 -16  15  378.16  268.31
 -12 -16 -15  -50.70  134.85
  12  16 -15  162.86  137.02
 -12 -16 -14   60.09  196.97
  12  16 -14   22.89  196.05
  12 -16  14  -31.19  195.28
  12  16 -14 -157.36  195.70
 -12 -16 -14  -95.41  198.02
 -12 -16 -13  -85.26  139.22
  12  16 -13 -193.92  195.86
 -12 -16 -13   -5.17  219.91
  12  16 -13   72.67  122.59
  12 -16  13  363.95  275.02
  12  16 -12  -95.07  193.98
  12  16 -12 -130.10  194.46
 -12 -16 -12  180.39  196.62
 -12 -16 -12 -135.73  195.13
  12  16 -11  102.91  217.25
 -12 -16 -11   79.12  199.93
  12  16 -11   14.38  128.47
  12 -16  11  125.35  255.17
 -12 -16 -11  -37.43  139.32
  12  16 -10  220.21  121.12
 -12 -16 -10 -162.66  131.26
  12 -16  10   86.65  200.09
 -12 -16 -10  -63.69  201.49
  12  16 -10    9.75  195.61
 -12 -16  -9   71.33  149.18
  12 -16   9   59.82  202.04
 -12 -16  -9  279.19  203.23
  12  16  -9  274.64  130.03
  12  16  -9  308.08  213.19
  12 -16   8  451.43  232.12
 -12 -16  -8  483.51  189.82
 -12 -16  -8  462.38  151.27
  12 -16   8  443.99  154.39
  12  16  -8  192.48  211.44
  12  16  -8  342.89  119.80
  12 -16   7  383.39  155.57
  12 -16   7  293.57  230.07
  12  16  -7  245.77  115.75
 -12 -16  -7  570.52  203.96
 -12 -16  -7  376.32  153.18
  12  16  -7  338.41  211.74
  12  16  -6  445.88  137.20
  12  16  -6  938.91  232.99
  12 -16   6  923.56  177.50
 -12 -16  -6 1289.85  261.17
  12  16  -6  522.05  138.98
  12 -16   6 1003.83  226.54
 -12 -16  -6  889.36  168.64
 -12 -16  -5  237.65  225.62
  12 -16   5  819.15  226.22
  12  16  -5  582.27  138.42
  12 -16   5  394.73  168.50
  12  16  -5  353.98  141.10
 -12 -16  -5  553.73  154.57
  12 -16   4  425.78  236.36
  12  16  -4  129.02  125.23
 -12 -16  -4  526.65  233.16
 -12 -16  -4  383.41  158.57
  12  16  -4  295.76  136.97
  12 -16   4  240.72  158.63
  12  16  -3  362.94  126.21
  12  16  -3  277.62  151.12
 -12 -16  -3  857.89  254.46
  12 -16   3  555.53  238.70
  12 -16   3  496.81  178.02
 -12 -16  -2  652.09  246.28
  12  16  -2   64.07  145.21
  12  16  -2  417.30  131.69
  12 -16   2  409.93  173.88
 -12 -16  -1  861.03  267.32
  12  16  -1  285.45  150.25
  12  16  -1  658.25  141.53
 -12  16   0 1708.77  258.32
 -12 -16   0 1601.20  310.90
  12 -15  17 -147.03  143.80
  12  15 -17 -129.77  143.42
 -12 -15 -17   45.37  144.11
  12  15 -17 -113.26  144.75
  12  15 -16  173.92  131.54
 -12 -15 -16  -69.65  150.47
  12 -15  16  405.47  251.12
  12  15 -16 -292.46  212.06
  12  15 -15  -46.13  168.30
  12  15 -15   49.45  167.40
 -12 -15 -15  -32.59  169.14
 -12 -15 -15   70.55  168.57
  12 -15  15 -113.46  167.37
 -12 -15 -14   49.13  138.38
  12  15 -14  122.07  130.21
  12  15 -14  359.34  194.66
  12 -15  13   -4.25  231.14
  12  15 -13  271.32  212.19
 -12 -15 -13  238.52  139.05
 -12 -15 -13  573.00  223.47
  12  15 -13   90.89  121.94
 -12 -15 -12  287.58  159.89
  12  15 -12  336.74  194.74
  12 -15  12  273.13  229.52
  12  15 -12   30.94  123.20
 -12 -15 -12  342.59  212.87
 -12 -15 -11  231.83  137.11
  12  15 -11  585.40  241.96
 -12 -15 -11  135.00  212.64
  12 -15  11  604.66  233.94
  12  15 -11   73.28  129.12
  12  15 -10  177.09  126.20
 -12 -15 -10  189.60  132.68
  12  15 -10  367.42  233.01
  12 -15  10  -46.61  231.13
 -12 -15 -10  300.60  202.73
  12  15  -9  203.76  225.07
 -12 -15  -9  150.52  154.95
  12  15  -9  110.29  122.26
  12 -15   9    2.15  208.63
 -12 -15  -9  -56.25  173.58
  12 -15   8    6.22  135.96
 -12 -15  -8   27.10  137.93
  12 -15   8 -161.05  233.31
  12  15  -8  420.97  207.25
  12  15  -8   74.80  115.66
 -12 -15  -8   46.98  179.95
  12  15  -8   70.30  120.03
  12  15  -7  -27.26  121.18
 -12 -15  -7  -24.27  200.01
 -12 -15  -7  -98.64  134.58
  12 -15   7  -52.00  204.33
  12 -15   7  190.31  151.78
  12  15  -7  -74.42  186.92
  12  15  -7  193.53  117.58
  12  15  -6   46.40  118.62
 -12 -15  -6  210.03  145.20
  12 -15   6  233.74  210.63
 -12 -15  -6 -156.57  198.09
  12 -15   6  198.24  153.78
  12  15  -6  -86.68  178.09
  12  15  -5  138.23  194.48
  12 -15   5  104.74  209.02
 -12 -15  -5 -113.43  217.35
  12 -15   5  137.15  154.71
 -12 -15  -5   61.17  134.28
  12  15  -5   41.09  119.43
  12  15  -5 -102.81  125.66
  12  15  -4  288.48  116.78
  12 -15   4  -12.73  185.77
  12 -15   4  393.90  162.40
 -12 -15  -4  153.36  140.83
 -12 -15  -4   58.61  215.68
  12  15  -4  285.25  137.47
  12 -15   3   28.30  211.37
 -12 -15  -3  598.02  233.75
  12  15  -3  153.89  118.79
  12 -15   3   10.45  158.67
  12  15  -3 -129.26  133.18
  12 -15   2   21.68  163.13
  12  15  -2  189.43  135.59
 -12 -15  -2  273.09  222.77
  12 -15   2  264.29  200.97
  12  15  -2  170.57  117.88
  12  15  -1   26.67  116.30
  12  15  -1   26.75  128.21
 -12 -15  -1   50.55  233.40
 -12  15   1  220.26  144.40
  12 -15   1  249.04  187.06
  12 -15   1   -1.03  163.23
 -12  15   0  162.46  159.32
 -12 -15   0  114.90  258.79
  12  14 -17  -25.82  138.74
  12 -14  17  -23.64  139.27
 -12 -14 -17    4.32  139.30
  12  14 -17 -136.93  140.21
  12 -14  16 -162.72  249.95
  12  14 -16  110.39  229.47
  12  14 -16  106.29  120.59
 -12 -14 -16   36.81  146.31
  12  14 -15   18.05  125.37
 -12 -14 -15   91.76  200.69
 -12 -14 -15  -91.19  145.30
  12 -14  15  269.85  245.38
  12  14 -15  117.62  205.46
  12  14 -14  274.66  230.21
  12 -14  14 -455.98  230.13
  12  14 -14   52.30  231.13
 -12 -14 -14    2.02  231.85
 -12 -14 -14  -99.79  232.80
  12  14 -13    1.38  196.33
  12 -14  13 -237.09  195.82
 -12 -14 -13 -107.96  198.31
  12  14 -13  -66.11  196.08
 -12 -14 -13 -102.93  197.45
  12  14 -12   33.44  112.99
 -12 -14 -12   14.23  151.34
 -12 -14 -12   22.51  210.74
  12  14 -12  -58.54  183.43
 -12 -14 -11  172.48  204.99
  12  14 -11   69.55  164.61
 -12 -14 -11  -35.14  136.51
  12  14 -11  117.28  121.46
  12 -14  10  -67.80  206.52
  12  14 -10   41.62  124.64
 -12 -14 -10  194.53  173.22
 -12 -14 -10   80.70  128.81
  12  14 -10 -105.93  184.13
  12  14  -9  557.34  197.83
 -12 -14  -9  183.51  134.07
  12 -14   9  179.21  222.91
  12 -14   9   71.26  152.42
 -12 -14  -9 -105.92  202.81
  12  14  -9  194.60  113.75
 -12 -14  -8  -86.08  187.37
  12 -14   8  143.21  140.83
  12  14  -8   41.49  107.25
 -12 -14  -8   81.26  140.34
  12 -14   8  -56.44  205.74
  12  14  -8  -56.51  177.27
  12  14  -8  137.66  121.68
 -12 -14  -7  208.66  202.19
  12 -14   7  300.67  207.22
  12 -14   7  175.52  144.36
  12  14  -7  276.39  122.52
  12  14  -7  119.90  121.36
 -12 -14  -7  130.59  127.39
  12  14  -7   45.74  194.41
  12 -14   6  183.95  193.10
 -12 -14  -6  -20.99  202.51
  12 -14   6  186.72  163.92
  12  14  -6  250.97  126.30
  12  14  -6  234.53  113.99
 -12 -14  -6  352.98  159.49
  12 -14   5   79.30  212.09
  12 -14   5  -60.56  213.04
  12  14  -5  114.14  213.50
 -12 -14  -5  -73.18  210.90
 -12 -14  -5   32.54  209.75
  12  14  -5 -173.97  210.14
 -12 -14  -4  165.41  207.17
 -12 -14  -4 -105.53  128.50
  12 -14   4   39.89  143.10
  12  14  -4  -88.43  138.05
  12  14  -4   72.18  123.47
  12 -14   4   78.00  211.36
  12  14  -3  146.25  119.34
  12  14  -3  -11.07  129.41
  12 -14   3  360.55  176.23
  12 -14   3  401.01  204.88
 -12 -14  -3  290.54  161.65
 -12 -14  -3  324.75  212.98
  12 -14   2   86.95  206.42
  12 -14   2  152.20  162.10
 -12 -14  -2  456.37  236.74
 -12  14   2  322.83  164.30
  12  14  -2   97.10  116.36
  12  14  -1  556.43  125.43
  12  14  -1  372.07  137.91
 -12 -14  -1  283.34  257.33
  12 -14   1  405.72  170.89
 -12  14   1  581.32  181.18
  12 -14   1  614.89  228.87
 -12 -14   0  417.19  259.37
 -12  14   0  300.63  187.28
  12 -13  18  -84.50  138.60
  12  13 -18  -73.69  137.67
 -12 -13 -18 -139.55  137.65
  12  13 -18  -35.21  139.38
  12 -13  17  359.28  249.11
 -12 -13 -17  -50.46  139.80
  12  13 -17 -191.77  220.44
  12  13 -17   23.95  128.63
  12 -13  16    6.54  172.97
 -12 -13 -16   24.06  173.12
  12  13 -16 -212.15  172.45
  12  13 -16 -127.10  174.21
 -12 -13 -16  267.67  173.70
  12  13 -15  332.31  194.41
  12  13 -15   90.58  115.20
  12 -13  15  120.93  262.30
 -12 -13 -15    5.04  139.28
 -12 -13 -15   33.50  204.43
  12  13 -14  358.99  193.47
  12 -13  14   29.76  270.60
 -12 -13 -14  107.41  231.58
  12  13 -14   31.79  114.02
 -12 -13 -14   33.21  137.49
 -12 -13 -13  730.20  234.01
  12  13 -13  392.02  132.44
  12 -13  13  270.11  225.44
  12  13 -13  667.44  208.33
 -12 -13 -13  348.82  131.15
  12 -13  12  380.56  244.90
  12  13 -12  -45.82  118.57
  12  13 -12  135.05  190.67
 -12 -13 -12  319.64  188.71
 -12 -13 -12  291.74  136.15
 -12 -13 -11  391.72  132.54
 -12 -13 -11  768.93  189.80
  12  13 -11  351.04  128.95
  12 -13  11  567.04  233.99
  12  13 -11  723.62  198.26
 -12 -13 -10  183.86  140.64
  12  13 -10  587.76  242.63
  12 -13  10  145.71  240.85
  12  13 -10  418.01  118.24
 -12 -13 -10  110.99  202.79
  12  13  -9 -155.37  186.17
  12  13  -9  -99.04  185.47
 -12 -13  -9   62.45  186.32
 -12 -13  -9  193.59  186.52
  12 -13   9   66.87  185.74
  12 -13   8  557.08  169.72
 -12 -13  -8  552.13  139.13
  12  13  -8  326.39  100.26
 -12 -13  -8  648.65  188.16
  12 -13   8  389.49  213.76
  12  13  -8  394.96  187.24
  12  13  -8  592.09  127.70
 -12 -13  -7   84.45  134.61
  12  13  -7  210.18  179.64
  12  13  -7  -37.24  115.16
  12 -13   7  135.30  200.49
  12 -13   7   31.31  148.60
  12  13  -7  153.19  118.91
 -12 -13  -7  529.66  204.88
  12 -13   6 1012.61  162.84
 -12 -13  -6  693.34  146.05
  12  13  -6  600.24  139.39
 -12 -13  -6  942.56  201.10
  12 -13   6 1057.96  248.14
  12  13  -6  760.01  137.35
  12  13  -5  301.46  124.62
 -12 -13  -5  151.91  138.06
 -12 -13  -5  971.21  250.03
  12 -13   5  455.79  218.48
  12 -13   5  -83.99  159.23
  12  13  -5  -97.77  125.21
  12  13  -4 1707.06  167.63
  12 -13   4 1582.09  243.82
  12 -13   4 1903.17  281.69
 -12 -13  -4 1765.44  186.10
 -12 -13  -4 1996.74  284.90
  12  13  -4 1494.08  178.06
 -12 -13  -3  452.27  145.35
  12 -13   3  225.11  151.02
  12  13  -3  340.28  119.93
  12 -13   3  236.93  225.86
 -12 -13  -3  833.02  233.69
  12  13  -3  182.32  118.42
 -12  13   3  868.89  373.29
  12 -13   2 1280.77  260.86
  12  13  -2  947.72  169.46
  12  13  -2  982.59  145.41
  12 -13   2 1277.33  195.33
 -12 -13  -2 1196.32  275.10
  12  13  -1  542.67  123.79
  12 -13   1  379.42  174.81
 -12  13   1  379.34  184.10
  12 -13   1  604.52  245.33
 -12 -13  -1  664.13  254.75
 -12  13   0 1430.16  205.15
 -12 -13   0 1111.25  292.31
  12  12 -19  -51.45  138.54
 -12 -12 -19  -71.70  136.14
  12 -12  19   17.56  138.17
  12 -12  18  172.57  281.20
 -12 -12 -18  142.64  133.22
  12  12 -18  200.96  226.76
  12  12 -18  -43.95  132.06
  12  12 -17  -49.47  144.25
  12  12 -17 -167.55  142.45
 -12 -12 -17    0.45  142.28
  12 -12  17   33.65  143.21
  12  12 -16   78.89  141.51
  12  12 -16   40.19  143.11
 -12 -12 -16    5.92  141.59
  12 -12  16 -260.18  142.03
 -12 -12 -16   38.95  142.45
 -12 -12 -15  -52.57  136.43
 -12 -12 -15   -2.82  180.67
  12 -12  15  292.86  282.76
  12  12 -15    8.42  132.81
  12  12 -15   55.36  205.59
 -12 -12 -14   87.76  132.94
  12  12 -14  129.23  107.91
  12 -12  14   48.98  247.92
 -12 -12 -14 -126.51  221.21
  12  12 -14   25.47  227.36
  12  12 -13   62.92  185.94
 -12 -12 -13   61.41  139.25
  12  12 -13   74.88  117.84
  12 -12  13  186.16  237.42
 -12 -12 -13  348.68  210.41
  12  12 -12  115.65  176.19
 -12 -12 -12   43.84  189.62
  12  12 -12   32.45  108.36
  12 -12  12   31.63  252.33
 -12 -12 -12   61.77  130.01
 -12 -12 -11  412.98  133.11
  12 -12  11  560.95  228.48
 -12 -12 -11  407.32  201.78
  12  12 -11  441.28  126.00
  12  12 -11  390.65  193.84
  12  12 -10  -20.89  113.25
  12 -12  10  139.05  239.29
  12  12 -10  111.76  168.43
 -12 -12 -10  122.14  136.14
 -12 -12 -10  230.32  184.53
  12  12  -9  528.45  207.53
  12 -12   9  669.63  230.20
 -12 -12  -9  736.63  195.74
  12  12  -9  532.09  119.24
 -12 -12  -9  436.85  140.08
  12  12  -8  275.51  187.77
  12  12  -8  365.50   95.27
  12  12  -8  109.67  110.44
 -12 -12  -8  248.38  179.20
 -12 -12  -8  250.16  127.78
  12 -12   8  156.01  205.09
 -12 -12  -7  451.69  132.76
  12  12  -7  480.22  129.59
  12  12  -7  501.60  117.08
 -12 -12  -7  456.17  209.67
  12 -12   7  673.05  159.17
  12 -12   7  348.27  221.30
 -12 -12  -6   68.54  125.10
  12 -12   6  107.72  142.79
  12  12  -6    0.37  123.82
 -12 -12  -6  285.52  215.18
  12 -12   6  365.01  203.89
  12  12  -6    1.47  110.55
  12  12  -5  159.57  115.19
 -12 -12  -5  301.85  202.39
 -12  12   5  246.99   79.35
 -12 -12  -5  207.97  129.34
  12  12  -5  116.08  121.62
  12 -12   5  265.86  148.87
  12 -12   5  286.18  193.56
 -12  12   5  155.63  143.75
 -12 -12  -4  388.43  190.20
 -12 -12  -4   35.39  125.86
  12 -12   4  -30.06  151.51
 -12  12   4  106.30   82.53
  12  12  -4   20.25  121.19
  12 -12   4  255.31  193.53
 -12  12   4  171.39  149.68
  12  12  -4  178.43  118.16
 -12 -12  -3  762.85  139.86
  12 -12   3  616.82  199.51
  12  12  -3  584.07  138.16
  12 -12   3  768.83  193.13
 -12  12   3  892.32  180.48
 -12 -12  -3  557.06  264.04
  12  12  -3  625.94  134.21
  12 -12   2  327.24  152.81
  12  12  -2 -235.07  140.55
 -12  12   2  161.63   84.61
  12  12  -2  246.78  113.56
 -12 -12  -2  401.32  234.35
  12 -12   2  330.52  187.55
 -12  12   2  268.88  159.18
 -12 -12  -1  943.06  243.04
  12 -12   1 1070.50  229.76
  12  12  -1  777.87  135.62
  12 -12   1  654.81  184.39
  12  12  -1  783.90  153.16
 -12  12   1  917.76  183.15
 -12 -12   0  325.29  252.04
 -12  12   0  339.45  157.88
  12  11 -19  -84.00  139.84
  12 -11  19   93.75  277.63
 -12 -11 -19  102.96  153.15
  12  11 -19  -23.80  209.79
  12  11 -18  -18.81  212.31
  12 -11  18  192.21  281.93
 -12 -11 -18   31.81  138.47
  12  11 -18  259.80  153.13
  12  11 -17  177.53  194.67
  12  11 -17    6.87  122.85
 -12 -11 -17 -162.09  123.86
 -12 -11 -17  227.00  143.74
  12 -11  17   76.94  279.73
  12  11 -16 -162.22  135.28
  12 -11  16 -277.61  135.81
  12  11 -16 -150.71  136.92
 -12 -11 -16  -79.47  134.85
  12 -11  15 -308.31  134.71
  12  11 -15  -56.89  135.73
 -12 -11 -15  -29.36  134.14
  12  11 -15  -26.80  134.37
  12  11 -14  109.78  194.36
  12  11 -14  -98.57  195.80
 -12 -11 -14    1.92  196.12
  12 -11  14  -33.42  194.65
 -12 -11 -14   55.73  194.27
  12  11 -13   20.92  192.55
 -12 -11 -13   68.56  194.35
  12  11 -13 -104.50  193.38
  12 -11  13  -14.34  192.67
 -12 -11 -13  105.65  192.66
  12 -11  12  152.17  175.97
 -12 -11 -12  -82.65  176.31
  12  11 -12  -12.18  175.97
 -12 -11 -12 -141.30  177.49
  12  11 -12   -8.54  176.21
  12  11 -11  -55.77  177.62
  12 -11  11  129.36  214.66
  12  11 -11   71.83  114.69
 -12 -11 -11   71.51  185.89
 -12 -11 -11  -36.85  121.41
  12  11 -10  576.05  190.51
 -12 -11 -10  214.45  190.10
  12  11 -10  302.51  113.01
  12 -11  10  305.10  235.54
 -12 -11 -10  208.93  125.01
 -12 -11  -9   77.19  125.82
  12  11  -9    4.72  115.11
  12 -11   9   34.25  213.94
 -12 -11  -9  116.24  195.21
  12  11  -9 -190.66  179.49
  12  11  -8  212.38  118.79
  12  11  -8  371.73  184.76
 -12 -11  -8  249.28  125.75
 -12 -11  -8  324.44  168.10
  12  11  -8  288.36   93.44
  12 -11   8  241.56  196.57
  12 -11   7   42.01  188.89
  12  11  -7 -133.29  190.39
  12  11  -7 -194.95  190.29
 -12 -11  -7  323.74  189.32
 -12 -11  -7  -91.59  190.34
  12  11  -7  -20.67  187.97
  12 -11   7  103.09  190.43
  12  11  -6  159.85  115.26
  12  11  -6   38.83  108.46
 -12 -11  -6 -124.63  174.74
  12 -11   6   87.12  140.73
  12 -11   6  -68.13  209.34
 -12 -11  -6   93.19  117.36
  12 -11   5   51.26  133.70
 -12 -11  -5   10.45  110.68
  12  11  -5   11.39  119.06
 -12 -11  -5   -9.74  191.79
  12  11  -5   88.88  111.22
  12 -11   4  179.80  170.33
  12  11  -4  154.24  126.32
 -12 -11  -4  252.70  113.48
  12  11  -4  148.81  114.44
 -12 -11  -4  122.40  202.57
  12 -11   4  456.99  192.17
  12 -11   3  -17.62  154.08
 -12  11   3  242.20  285.01
 -12 -11  -3  470.57  211.38
  12  11  -3    3.53  118.57
  12  11  -3   99.66  109.70
 -12 -11  -3   84.91  110.77
  12 -11   3  123.89  194.00
 -12  11   3  324.24  152.80
 -12  11   2  403.90  100.17
  12 -11   2  379.14  195.17
 -12  11   2  420.28  149.97
  12  11  -2  464.53  125.19
 -12 -11  -2  662.88  206.01
  12  11  -2  340.31  126.26
  12 -11   2  387.65  173.02
 -12 -11  -2  470.78  115.58
 -12  11   2  479.25  297.42
  12  11  -1  -41.31  130.69
  12 -11   1  -30.94  201.38
  12  11  -1  -33.11  112.02
 -12  11   1  140.15  151.21
 -12  11   1   36.08   85.29
 -12 -11  -1  167.50  224.16
 -12  11   0  394.37  174.98
 -12 -11   0  303.62  253.31
 -12  11   0  294.51   99.97
  12 -10  20  260.49  259.95
 -12 -10 -20  -92.65  147.31
  12  10 -20 -142.02  190.96
  12  10 -20  131.37  140.11
  12  10 -19 -250.13  127.35
  12 -10  19 -401.21  128.57
  12  10 -19   45.21  128.73
 -12 -10 -19 -211.96  125.84
 -12 -10 -18   85.75  144.35
  12 -10  18  102.62  292.11
  12  10 -18   68.95  178.45
  12  10 -18  -43.82  126.23
 -12 -10 -17  257.33  130.35
  12  10 -17   99.87  136.51
 -12 -10 -17   -6.86  137.85
  12  10 -17  -87.81  190.02
  12 -10  17   85.82  277.51
  12  10 -16  173.73  205.07
  12  10 -16   88.48  133.72
  12 -10  16 -330.39  274.75
 -12 -10 -16   30.41  132.12
 -12 -10 -16  357.73  184.81
 -12 -10 -15  156.01  134.30
  12  10 -15  145.83  128.35
  12 -10  15  -47.67  256.77
  12  10 -15  133.79  175.70
 -12 -10 -15  298.76  185.13
  12 -10  14  365.92  250.50
 -12 -10 -14  205.49  126.69
  12  10 -14  207.58  122.93
  12  10 -14  324.58  206.25
  12  10 -13  136.07  113.28
 -12 -10 -13  100.08  201.73
 -12 -10 -13   91.38  128.90
  12  10 -13  212.19  174.84
  12 -10  13   74.78  245.25
  12  10 -12  141.79  115.41
 -12 -10 -12  333.62  127.39
 -12 -10 -12  357.75  196.01
  12 -10  12  116.25  239.44
  12  10 -12  308.34  156.59
 -12 -10 -11  148.44  181.74
  12  10 -11   -2.76  172.33
  12  10 -11    6.18  113.96
 -12 -10 -11  209.31  118.94
  12  10 -10  231.89  116.67
  12 -10  10  243.14  241.15
  12  10 -10  298.00  160.29
 -12 -10 -10   93.83  119.83
 -12 -10 -10  115.54  178.63
 -12 -10  -9  165.17  120.85
 -12 -10  -9  444.75  190.93
  12  10  -9  534.36  152.92
  12  10  -9  340.49  117.18
 -12 -10  -8  130.70  113.41
  12  10  -8  142.31  120.16
 -12 -10  -8  286.98  183.50
  12  10  -8  237.18  173.12
  12 -10   8   72.96  213.51
 -12  10   8  555.40  288.82
 -12 -10  -7  546.22  129.11
  12  10  -7  705.43  129.87
 -12 -10  -7  538.03  188.47
  12  10  -7  540.68  110.07
 -12  10   7  669.29  329.63
  12 -10   7  477.04  212.83
  12  10  -7  709.83  179.01
 -12 -10  -6   54.18   99.65
  12 -10   6   48.27  146.78
  12  10  -6   96.16  113.37
 -12 -10  -6  470.78  214.82
 -12  10   6  351.86  304.78
  12 -10   6  161.44  208.91
  12  10  -6   75.12  110.66
  12 -10   5 1137.70  183.34
  12  10  -5 1136.74  134.92
 -12 -10  -5  705.89  146.85
  12  10  -5  872.44  145.14
  12 -10   5  954.95  232.48
 -12 -10  -5  886.20  253.63
 -12  10   5 1828.70  350.11
 -12  10   4  458.30  287.76
 -12 -10  -4  154.75  104.33
 -12  10   4  265.50  154.84
  12  10  -4   26.09  121.46
  12  10  -4   87.04  113.45
 -12 -10  -4  668.60  231.65
 -12  10   3 1764.96  200.21
 -12 -10  -3 1470.12  161.23
 -12 -10  -3 1760.00  272.69
  12  10  -3 1386.43  157.42
  12  10  -3 1300.89  142.40
 -12 -10  -2  964.19  256.85
 -12  10   2  598.70  159.45
  12  10  -2  211.44  107.49
  12 -10   2  205.04  209.16
 -12 -10  -2  370.56  113.49
 -12  10   2  508.19  298.84
  12  10  -2  117.66  132.78
  12 -10   2  316.66  163.00
  12 -10   1 2203.74  297.96
 -12  10   1 2367.90  261.67
  12  10  -1 1712.51  156.29
  12  10  -1 1557.52  167.78
 -12 -10  -1 1906.61  285.76
  12 -10   1 1935.40  241.68
 -12  10   0  306.51  151.40
 -12 -10   0  145.93  268.08
 -12  10   0   -2.16  102.46
  12   9 -21   15.37  130.56
  12  -9  21  145.38  266.22
 -12  -9 -21    7.86  146.99
 -12  -9 -20   79.17  134.09
  12  -9  20  -38.54  137.86
  12   9 -20  -64.95  137.14
  12   9 -19   31.71  131.81
 -12  -9 -19   29.78  128.67
  12  -9  19 -121.84  131.76
  12   9 -18  324.26  141.90
  12   9 -18 -160.48  143.57
  12  -9  18  230.98  142.90
 -12  -9 -18 -118.50  140.03
  12   9 -17  122.69  199.24
  12  -9  17   -5.82  256.25
  12   9 -17    3.64  125.45
 -12  -9 -17   30.46  125.88
 -12  -9 -17  -59.96  114.23
  12   9 -16   57.38  133.20
  12   9 -16    5.44  131.52
 -12  -9 -16    9.74  130.06
  12  -9  16 -269.21  132.03
  12   9 -15  -90.70  132.22
  12   9 -15   32.63  130.71
  12  -9  15   73.09  131.08
 -12  -9 -15    5.15  129.34
  12   9 -14  349.35  168.82
 -12  -9 -14  114.44  129.50
 -12  -9 -14  278.04  190.13
  12  -9  14  109.14  206.58
  12   9 -14   48.61  123.83
  12  -9  13  223.62  210.06
 -12  -9 -13  135.02  201.91
  12   9 -13  -42.72  169.74
 -12  -9 -13  -27.63  124.37
  12   9 -13    0.72  108.41
 -12  -9 -12   82.04  120.79
  12   9 -12  150.13  110.67
  12   9 -12   90.79  169.92
 -12  -9 -12  256.53  201.91
  12   9 -11   72.14  115.73
 -12  -9 -11  106.95  183.21
 -12  -9 -11   70.56  113.36
  12  -9  11  141.84  230.94
  12   9 -11  -54.52  167.66
  12   9 -10   31.24  109.64
  12   9 -10  468.86  167.88
 -12  -9 -10   24.96  114.12
 -12  -9 -10   16.20  173.91
  12  -9  10  193.58  210.43
  12  -9   9 -127.60  178.85
  12   9  -9 -114.45  178.59
 -12  -9  -9  -66.92  178.70
  12   9  -9 -117.02  178.31
 -12  -9  -9   72.87  177.97
  12   9  -8  257.98  119.07
 -12   9   8  711.16  280.92
  12  -9   8  328.67  211.81
 -12  -9  -8  245.77  110.88
  12   9  -8  288.21  163.84
 -12  -9  -8  558.64  187.89
  12   9  -8  342.80   78.55
 -12  -9  -7  285.26  111.68
 -12  -9  -7  453.03  187.41
  12   9  -7  352.87  113.02
  12  -9   7  194.99  211.77
 -12   9   7  640.06  310.85
 -12  -9  -6  443.28  106.58
  12   9  -6  431.00  106.85
 -12  -9  -5  884.22  209.19
  12   9  -5  669.73  107.43
 -12  -9  -5  505.79  112.87
  12   9  -5  360.16  126.49
 -12   9   4 1342.20  326.25
 -12  -9  -4 1007.35  224.16
 -12  -9  -4  661.15  123.93
  12   9  -4  899.26  137.84
  12   9  -4  773.14  115.97
 -12   9   3  462.33  158.16
  12  -9   3  442.55  143.74
  12   9  -3  226.49  123.05
 -12  -9  -3  349.32  102.31
  12  -9   3  487.87  205.85
 -12   9   3  473.14   97.64
 -12  -9  -3  345.75  219.28
  12   9  -3  310.74  100.30
 -12   9   3  301.25  293.92
 -12  -9  -2  764.50  238.29
 -12   9   2  576.00  114.12
 -12   9   2 1006.25  174.61
 -12   9   2  924.38  289.04
  12  -9   2  511.68  211.21
  12   9  -2  542.75  103.42
  12  -9   2  738.38  159.61
 -12  -9  -2  431.66  108.22
  12   9  -2  498.55  129.12
 -12   9   1  440.57  152.41
  12   9  -1  359.95  132.85
  12  -9   1  312.29  185.97
  12  -9   1  412.64  151.46
 -12  -9  -1  383.05  235.83
 -12   9   1  634.05  271.23
 -12  -9  -1  303.19  105.33
  12   9  -1  191.07   88.91
 -12   9   0  716.86  121.23
 -12   9   0  947.47  183.66
 -12  -9   0  582.34  246.99
  12  -8  21  -81.30  216.06
  12   8 -21  101.29  213.05
  12   8 -21 -138.87  213.42
  12   8 -20 -100.52  206.36
  12  -8  20   53.55  208.45
  12   8 -20   -9.14  207.01
  12  -8  19   42.37  130.90
  12   8 -19 -185.71  130.78
  12   8 -19   62.26  129.85
 -12  -8 -19  -65.31  127.68
  12   8 -18   -3.40  140.53
 -12  -8 -18  -31.33  136.97
  12   8 -18   -7.57  139.11
  12  -8  18 -296.70  139.99
 -12  -8 -17   53.64  127.94
  12   8 -17  414.78  201.06
  12  -8  17 -201.09  258.64
  12   8 -17  -31.20  128.13
 -12  -8 -16  122.84  150.28
 -12  -8 -16  104.25  147.88
  12   8 -16  -44.88  151.84
  12   8 -16 -163.26  149.97
  12  -8  16 -100.05  150.50
  12  -8  15   61.05  238.68
  12   8 -15    0.32  121.66
  12   8 -15   34.04  190.53
 -12  -8 -15  105.70  130.39
 -12  -8 -14 -164.29  170.91
  12   8 -14  106.74  164.49
 -12  -8 -14   -8.09  127.91
  12   8 -14   69.77  124.65
  12  -8  14  113.13  189.86
  12   8 -13  230.78  118.90
 -12  -8 -13  300.25  129.09
 -12  -8 -13  131.99  184.20
  12   8 -13  439.62  178.48
 -12  -8 -12  112.43  117.95
  12   8 -12   10.97  168.05
  12  -8  12  243.81  225.96
  12   8 -12  112.52  113.58
  12   8 -11  182.24  107.64
 -12  -8 -11  188.29  117.14
 -12  -8 -11  324.99  170.35
  12   8 -11  250.95  166.77
  12  -8  10 -181.52  201.83
  12   8 -10  230.04  109.75
  12   8 -10   79.22  148.17
 -12  -8 -10   -3.70  120.04
 -12  -8 -10  122.77  158.87
 -12  -8  -9   16.85  106.68
  12   8  -9  146.31  114.35
 -12  -8  -9  136.25  156.92
  12   8  -9  178.92  148.22
  12  -8   9   27.69  186.81
 -12  -8  -8 -106.03  175.12
  12   8  -8  -40.16  175.56
 -12  -8  -8   22.12  174.16
  12   8  -8    3.27  175.61
  12   8  -7  121.82   81.86
 -12  -8  -7   95.61  102.22
 -12  -8  -7  349.63  173.85
 -12  -8  -6  113.80  193.35
  12   8  -6  227.71   94.87
 -12  -8  -6   90.99   96.93
 -12  -8  -5  500.27  202.21
 -12  -8  -5  119.01   89.43
  12   8  -5   67.38   91.04
 -12  -8  -4  487.63  201.01
 -12   8   4  726.00  279.35
  12   8  -4  178.22   82.73
 -12  -8  -4  133.17   95.44
  12  -8   4  402.25  143.68
  12  -8   4  365.41  190.45
 -12  -8  -3 -127.36   88.78
 -12   8   3  -65.61  264.39
  12  -8   3   35.36  192.40
  12   8  -3   98.79   78.75
 -12  -8  -3  211.65  192.26
 -12   8   3   86.31  133.67
  12   8  -3  -70.30  114.16
  12  -8   3  119.99  140.94
 -12   8   2  150.81  209.27
 -12   8   2   52.28  207.38
  12   8  -2 -149.48  208.57
  12  -8   2  -16.42  209.70
 -12  -8  -2  261.01  206.07
  12  -8   2 -157.50  208.71
 -12  -8  -2    9.86  207.69
  12   8  -2 -164.00  206.16
  12   8  -1   68.13  113.09
 -12   8   1  172.41  139.93
  12  -8   1  129.54  132.76
 -12  -8  -1  127.96   85.39
 -12  -8  -1  111.18  262.92
 -12   8   1  217.64  268.54
 -12   8   0  115.06  116.48
 -12   8   0  216.35  139.35
 -12  -8   0  -15.81  224.98
  12  -7  21  260.85  230.67
  12   7 -20   61.08  137.14
 -12  -7 -20  -97.27  141.71
  12   7 -20  265.57  229.70
  12  -7  20  -68.36  224.02
  12   7 -19  102.36  133.77
  12  -7  19  312.79  247.77
  12   7 -19  231.21  186.10
 -12  -7 -19  103.18  132.45
 -12  -7 -18   -5.66  130.56
  12  -7  18  -79.54  133.37
  12   7 -18 -192.99  132.70
  12   7 -18   -8.92  133.74
 -12  -7 -17  381.00  126.77
  12  -7  17  477.47  225.21
  12   7 -17  197.52  130.53
  12   7 -17  257.81  194.66
  12  -7  16  -29.52  126.58
  12   7 -16    8.57  126.22
  12   7 -16  -86.21  127.68
 -12  -7 -16  159.94  126.32
 -12  -7 -16 -143.89  124.37
 -12  -7 -15  163.63  119.59
  12   7 -15   94.46  187.08
  12  -7  15   61.81  213.14
  12   7 -15  -96.59  119.70
  12   7 -14  203.26  189.88
 -12  -7 -14  102.75  114.29
  12  -7  14  -56.16  188.03
 -12  -7 -14 -142.94  158.85
  12   7 -14  -12.05  116.87
 -12  -7 -13   58.07  177.16
  12   7 -13 -175.64  176.28
  12  -7  13  -47.91  176.59
  12   7 -13   25.99  177.68
 -12  -7 -13  -98.72  173.57
  12   7 -12 -197.29  174.40
 -12  -7 -12  297.28  115.10
 -12  -7 -12  192.66  182.51
  12   7 -12   96.96  119.75
  12   7 -11   30.01  111.71
  12   7 -11   48.70  174.87
 -12  -7 -11   19.04  168.87
 -12  -7 -11   62.19  115.54
  12  -7  11  213.43  185.16
  12   7 -10  493.83  168.99
  12   7 -10  225.85  111.44
 -12  -7 -10  138.22  111.95
  12  -7  10  370.59  193.90
 -12  -7 -10  318.67  174.82
  12   7  -9  -11.58  161.13
 -12  -7  -9  172.12  166.36
 -12  -7  -9  182.46  124.37
 -12  -7  -9  113.18  114.67
 -12  -7  -8  107.41  103.90
  12   7  -8  131.74  155.85
 -12  -7  -8  269.16  168.52
 -12  -7  -7  325.52  105.65
 -12  -7  -7  705.06  209.95
 -12  -7  -6  137.93   86.33
 -12  -7  -6  246.34  179.63
 -12  -7  -5    5.55   85.83
  12   7  -5   33.78   83.13
  12  -7   5   59.01  171.38
 -12   7   5  -78.07  264.13
 -12  -7  -5  142.22  219.72
 -12   7   4 1211.52  284.13
  12   7  -4  773.40   93.46
 -12  -7  -4  911.27  222.49
 -12   7   4 1089.51  148.54
 -12  -7  -4  564.24   95.20
  12  -7   4  746.29  207.33
  12   7  -3  314.71   76.67
  12  -7   3  396.08  182.95
 -12   7   3  600.47  154.87
 -12  -7  -3  563.75  207.01
 -12   7   3  803.41  271.97
 -12  -7  -3  271.78   86.31
  12  -7   3  569.55  139.49
  12   7  -3  364.86  115.74
 -12  -7  -2  741.27   98.80
 -12   7   2 1193.13  172.16
  12  -7   2 1172.94  213.87
  12  -7   2 1088.91  185.01
 -12   7   2 1399.06  290.13
 -12   7   2 1054.56  137.17
 -12  -7  -2 1565.94  303.53
  12   7  -2  838.38   89.02
  12   7  -2  687.32  140.51
 -12  -7  -1  951.47  102.06
  12   7  -1  955.32  156.22
 -12   7   1 1682.08  301.64
 -12  -7  -1 1352.39  293.05
 -12   7   1 1331.09  204.93
 -12  -7   0 1398.30  331.81
 -12   7   0 1389.93  145.65
 -12  -7   0 1024.99  107.43
 -12   7   0 1161.59  182.13
 -12   7   0 1603.83  280.45
  12  -6  22  208.35  245.66
  12   6 -22  114.09  213.34
  12   6 -21   41.69  211.57
  12   6 -21  -13.02  133.60
  12  -6  21   81.75  216.64
  12   6 -20  119.06  217.14
  12  -6  20  187.58  209.37
 -12  -6 -19   -2.30  143.17
  12  -6  19   58.33  146.36
  12   6 -19  -80.20  145.67
  12   6 -19  -21.23  145.75
  12  -6  18 -203.53  207.44
  12   6 -18   18.11  137.06
  12   6 -18  251.47  210.23
  12   6 -17 -115.55  135.93
  12  -6  17 -105.49  135.19
  12   6 -17 -113.70  134.85
 -12  -6 -17 -158.87  132.99
  12  -6  16  245.99  222.78
  12   6 -16   -7.02  189.14
  12   6 -16   49.28  119.10
  12  -6  15   79.04  214.68
 -12   6  15  241.53  264.18
  12   6 -15   -7.70  121.03
  12   6 -15  183.24  189.38
  12  -6  14  147.62  175.22
  12   6 -14  125.48  172.74
 -12  -6 -14  337.67  148.00
 -12  -6 -14  167.01  123.31
  12   6 -14  131.68  125.30
 -12  -6 -13  104.78  113.67
  12  -6  13   60.40  191.37
  12   6 -13  508.01  176.23
  12   6 -13  309.37  123.94
  12   6 -12  496.54  118.41
 -12   6  12  505.63  252.15
  12   6 -12  586.19  176.26
 -12  -6 -12   87.29  117.04
 -12  -6 -11  116.00  114.91
  12   6 -11  109.05  111.02
  12   6 -11  141.69  167.03
 -12  -6 -11   36.53  173.12
  12  -6  11  229.36  181.57
 -12  -6 -10  219.16  168.16
  12   6 -10   19.89  164.61
 -12  -6 -10  132.47  104.91
  12   6 -10  150.82  105.95
 -12  -6 -10  285.74  150.15
  12   6  -9  113.03   93.28
 -12  -6  -9   16.38  171.25
  12   6  -9  127.37  166.24
 -12  -6  -9  192.37  101.56
 -12  -6  -9  128.69  151.11
 -12  -6  -8   50.82  138.78
 -12  -6  -8  -29.38  133.53
  12   6  -8  -77.47  135.46
 -12  -6  -8 -123.87  135.21
 -12  -6  -7  431.37  140.73
 -12  -6  -7  713.13  183.55
 -12  -6  -6   77.19   82.64
 -12  -6  -6  438.29  183.57
 -12  -6  -6  177.90  137.15
  12   6  -6   66.50   87.44
 -12  -6  -5 1542.85  237.76
 -12   6   5 1832.55  278.93
  12   6  -5 1200.83  105.72
 -12   6   5 1799.11  167.37
  12   6  -5 1151.25  130.62
 -12  -6  -5 1002.78  107.90
 -12   6   4  289.31  224.50
 -12  -6  -4  413.34  208.54
  12   6  -4  285.60   71.67
 -12   6   4  700.98  135.74
 -12  -6  -4  277.36   70.05
 -12  -6  -3 1555.75  267.13
  12   6  -3 1019.93   90.10
 -12  -6  -2  236.46   63.51
 -12  -6  -2  607.73  244.96
 -12  -6  -1 1202.66  276.01
 -12   6   0 1743.68  194.57
 -12  -6   0 1119.07   94.73
 -12  -6   0 1565.36  289.78
 -12   6   0 1987.04  311.89
  12  -5  22    2.49  233.21
  12   5 -22  -68.55  231.57
  12   5 -22   21.17  226.59
  12   5 -21 -220.93  182.66
  12  -5  21 -241.54  183.65
  12   5 -21  -16.73  179.90
 -12  -5 -21 -149.59  178.19
  12   5 -20   14.29  195.86
  12   5 -20   56.14  125.38
 -12   5  20  293.94  249.80
  12  -5  20  -72.23  189.37
  12  -5  19  -90.79  195.41
  12   5 -19   43.12  194.93
  12   5 -19 -185.52  194.22
  12  -5  18   63.32  216.58
  12   5 -18   32.96  124.46
 -12  -5 -17   53.31  141.52
  12  -5  17  -57.39  143.12
  12   5 -17  -51.46  143.69
  12   5 -17  -32.45  142.97
  12   5 -16  204.14  183.92
  12  -5  16  -21.75  182.73
  12   5 -16   43.29  124.29
 -12  -5 -16  116.76  121.78
  12  -5  15 -147.11  126.12
 -12  -5 -15  -26.06  125.10
  12   5 -15   94.01  127.18
  12   5 -15   72.73  126.02
 -12  -5 -14  270.15  116.85
 -12  -5 -14  537.89  193.45
  12   5 -14  211.34  204.22
  12   5 -14   45.55  114.87
  12  -5  14  374.16  178.98
  12   5 -13   24.17  116.15
  12   5 -13  144.42  191.97
 -12  -5 -13   40.17  136.72
  12   5 -12  170.36  172.51
  12   5 -12  212.78  108.95
  12   5 -11  -23.89  109.51
  12   5 -11  184.90  174.46
 -12  -5 -11   97.39  106.01
  12  -5  11  -56.88  150.42
 -12  -5 -10  260.73   98.59
  12   5 -10  280.84  167.89
  12   5 -10  205.85   96.42
  12   5  -9    4.95   86.99
  12   5  -9   31.13  182.76
 -12  -5  -9 -174.57  162.81
 -12  -5  -9   28.97   89.77
 -12  -5  -9  137.96  144.90
 -12  -5  -8  556.82  167.31
 -12  -5  -8  610.37  178.21
 -12  -5  -7  -36.62  149.76
 -12  -5  -7  132.14  174.59
  12   5  -6  382.53  143.07
 -12  -5  -6  451.63  151.86
 -12  -5  -6  554.87  182.30
 -12  -5  -5 -184.45  144.14
 -12  -5  -5  119.58  148.01
 -12  -5  -4  239.25  150.28
 -12  -5  -4  -27.81  217.65
 -12  -5  -3  777.87  161.64
 -12  -5  -3  319.83  236.60
 -12  -5   0   93.72  170.26
 -12  -5   0  142.24  245.80
 -12   5   0  -57.97  229.91
 -12   5   0  334.59  133.29
  12   4 -22   22.23  138.16
  12  -4  22  278.39  222.91
  12   4 -22   -1.67  234.74
  12   4 -21  220.89  214.39
  12  -4  21  104.19  214.97
  12  -4  20  -76.53  211.21
  12   4 -20  131.39  228.06
 -12  -4 -20    8.15  176.87
  12   4 -19 -297.66  214.44
  12  -4  19 -172.73  214.41
  12   4 -18  -78.60  128.96
  12  -4  18  270.94  208.36
  12  -4  17 -164.42  203.17
  12   4 -17  224.48  203.33
  12   4 -17 -102.55  203.61
 -12   4  16   74.81  233.37
  12   4 -16   71.55  187.54
  12   4 -16  144.94  120.63
  12  -4  16    1.88  190.69
  12   4 -15 -151.72  117.19
 -12   4  15  111.50  114.94
 -12  -4 -15  -23.52  116.96
  12   4 -15   18.80  118.04
  12   4 -14  565.37  204.71
  12  -4  14   54.75  175.54
 -12  -4 -14  301.25  139.67
  12   4 -14  117.80  116.09
  12   4 -13  288.98  122.94
  12   4 -13  232.61  165.22
 -12   4  12   48.96  222.12
  12   4 -12   59.10  116.11
  12   4 -12  127.92  171.38
  12  -4  11  470.55  160.75
 -12  -4 -11  929.61  174.60
  12   4 -11  681.09  115.21
  12   4 -11  680.41  184.21
  12   4 -10  188.91   97.71
 -12  -4 -10  679.04  179.80
  12   4 -10  382.91  175.87
  12   4  -9  736.07   98.33
 -12  -4  -9  971.34  200.01
  12   4  -9  939.32  193.88
 -12  -4  -7  860.01  166.17
 -12  -4  -7  875.17  190.47
 -12  -4  -6  115.89  162.69
 -12  -4  -6   55.76  167.85
 -12  -4  -5   94.93  183.70
 -12  -4  -4  417.53  158.66
 -12  -4  -4  144.25  217.05
 -12  -4  -3  396.93  167.30
 -12  -4  -3  283.84  197.53
 -12  -4  -2  726.27  215.71
 -12  -4  -2  658.13  177.40
 -12  -4  -1 1068.64  235.17
 -12   4   1  970.85  152.91
 -12  -4  -1 1180.24  191.73
  12   4  -1  708.01  121.38
 -12  -4   0 1072.31  265.68
 -12  -4   0 1276.89  210.13
 -12   4   0 1296.10  195.39
 -12   4   0 1409.96  267.14
  12   3 -22 -100.01  219.43
  12  -3  22 -239.79  219.28
  12   3 -21   13.72  121.07
  12  -3  21  384.91  200.55
 -12  -3 -21 -170.84  179.69
  12   3 -21   79.48  225.70
  12   3 -20    8.85  212.40
  12  -3  20   85.77  211.86
  12   3 -20 -148.02  208.31
  12   3 -19   51.70  191.44
  12  -3  19 -101.92  190.86
  12   3 -19   34.72  188.90
  12  -3  18  -12.23  147.16
 -12  -3 -18  -27.94  146.92
  12   3 -18   14.77  147.62
 -12  -3 -17   37.41  145.79
  12  -3  17  -50.24  198.03
  12   3 -17  135.06  124.13
  12   3 -17  -26.81  180.28
  12   3 -16  266.35  198.26
 -12   3  16  260.95  239.38
 -12  -3 -16   62.17  131.19
  12  -3  16  253.21  176.30
  12   3 -16  -72.45  117.29
  12   3 -15  197.56  171.01
 -12   3  15  350.76  231.50
 -12  -3 -15  137.01  132.41
 -12  -3 -15  173.76  127.23
  12   3 -15  307.96  123.16
 -12   3  14  321.31  237.11
  12   3 -14  -21.35  120.28
 -12  -3 -14  106.25  118.91
 -12  -3 -14   54.09  130.47
  12   3 -14  235.31  167.60
  12   3 -13  165.87  117.78
  12  -3  13   38.87  162.98
 -12  -3 -13  392.38  140.24
 -12  -3 -13  276.62  117.55
  12   3 -13  422.90  174.01
  12   3 -12  259.31  158.15
  12   3 -12  336.13  116.42
 -12  -3 -12  150.36  109.30
 -12   3  12  536.88  256.57
  12  -3  12  324.05  157.87
 -12   3  11  101.07  158.44
 -12  -3 -11   54.27  161.19
  12   3 -11  -90.99  161.87
  12   3 -11 -220.79  160.76
 -12  -3 -10  820.24  183.53
  12   3 -10  630.37  175.97
  12   3  -9   27.91  152.11
 -12  -3  -9  343.05  160.23
 -12  -3  -7   80.09  156.59
 -12  -3  -6 1103.90  202.19
  12   3  -6  994.38  169.79
 -12  -3  -6 1037.68  204.85
 -12  -3  -5   52.10  177.43
  12   3  -5  269.10  147.76
 -12  -3  -5  210.61  193.25
 -12  -3  -4  846.93  199.00
  12   3  -4  602.04  152.20
 -12  -3  -4  905.97  190.00
 -12  -3  -3  177.15  184.89
  12   3  -3  281.32  114.58
  12   3  -3  356.58  146.92
 -12  -3  -3  254.10  179.92
 -12  -3  -2  601.89  190.10
  12   3  -2  616.73  132.62
 -12   3   2  677.38  138.65
 -12  -3  -2  860.10  231.53
 -12   3   2  804.73  214.77
  12   3  -2  661.22  156.61
 -12   3   1  933.06  229.73
 -12  -3  -1  590.37  227.68
 -12  -3  -1  531.31  194.81
  12   3  -1  707.82  124.25
 -12   3   1  641.64  140.15
  12   3  -1  646.73  176.77
 -12  -3   0  738.07  218.09
 -12  -3   0  570.10  188.26
 -12   3   0  731.75  158.87
 -12   3   0  708.01  231.06
 -12   3   0  644.34  220.96
  12   2 -22  220.07  217.36
  12  -2  22  -59.43  205.90
  12   2 -21  127.27  127.14
  12   2 -21  124.20  204.46
  12  -2  21   -0.56  196.42
  12  -2  20 -137.87  198.46
  12   2 -20   14.81  199.68
  12  -2  19  242.08  189.74
  12   2 -19   25.66  124.30
  12   2 -19  151.95  188.29
  12  -2  18  136.98  188.12
  12   2 -18  172.21  190.68
 -12   2  17   89.88  241.58
  12   2 -17   29.91  135.42
  12   2 -17  160.24  184.16
  12  -2  17   29.08  180.07
  12   2 -16  253.52  183.39
 -12  -2 -16   50.54  132.14
  12  -2  16   94.76  198.02
  12   2 -15  215.09  122.57
 -12  -2 -15  150.54  128.00
 -12  -2 -15  226.36  101.50
  12   2 -15  183.69  166.70
  12  -2  15  133.94  170.15
 -12   2  14  289.66  250.89
  12   2 -14  157.81  121.05
  12  -2  14  104.62  165.91
  12   2 -14  391.34  164.29
 -12   2  13  464.66  260.53
 -12  -2 -13   57.87  113.69
  12   2 -13  273.12  118.08
  12   2 -13  165.79  164.44
 -12  -2 -13  272.08  109.74
  12  -2  13  173.62  166.00
  12   2 -12  400.12  182.62
  12   2 -12  107.77  104.28
 -12  -2 -12  115.39  137.60
  12   2 -11   88.71   93.35
 -12  -2 -11    1.19  152.27
  12   2 -11  224.55  141.10
 -12  -2 -10  -82.98  166.16
 -12  -2  -9   48.53  171.01
  12   2  -9  -81.48  170.73
 -12  -2  -7  479.67  180.35
 -12  -2  -6   62.47  200.04
  12   2  -6  -53.52  200.62
 -12  -2  -6 -129.33  202.07
 -12  -2  -5 1059.97  192.30
  12   2  -5  843.08  165.93
 -12  -2  -5 1101.49  197.14
  12  -2   4  156.52  146.97
 -12  -2  -4  324.63  183.97
 -12   2   4  124.75  118.26
 -12  -2  -4  174.54  211.53
 -12   2   4  259.69  214.03
  12   2  -4  246.41  131.92
 -12   2   3 1270.95  145.61
 -12  -2  -3 1121.03  198.26
 -12  -2  -3  967.86  240.23
  12   2  -3 1279.61  190.33
 -12   2   3 1340.40  238.10
  12   2  -2  663.90  162.71
 -12   2   2  690.89  223.28
 -12  -2  -2  668.31  226.04
 -12   2   2  681.19  138.40
 -12  -2  -2  628.99  181.10
  12   2  -2  458.43  127.03
 -12   2   1 1310.83  254.51
 -12  -2  -1  832.67  240.92
 -12  -2  -1 1104.48  219.32
 -12   2   1 1170.03  225.80
 -12   2   1 1390.15  153.67
  12   2  -1  840.78  139.49
  12   2  -1  747.53  172.64
 -12  -2   0  234.65  207.04
 -12   2   0  343.03  145.29
 -12   2   0  118.29  211.52
 -12  -2   0  211.72  248.05
 -12   2   0  201.66  213.61
  12   1 -22  -70.07  188.48
  12   1 -22   36.29  196.72
  12   1 -21   19.70  132.47
  12  -1  21  408.45  197.72
  12   1 -21 -196.55  187.46
  12   1 -20 -242.90  196.46
  12  -1  20  -13.76  200.38
  12   1 -20   29.95  202.38
  12   1 -19  -99.39  200.38
  12  -1  19  -54.36  198.50
  12   1 -18  107.32  169.06
  12  -1  18  -25.57  188.74
  12   1 -18   80.79  140.75
 -12   1  18  150.52  235.29
  12   1 -17  -90.38  178.15
  12   1 -17   17.95  124.74
  12  -1  17  272.17  182.17
 -12   1  17  216.85  221.29
  12  -1  16  120.01  184.26
  12   1 -16  211.73  122.95
 -12   1  16  274.62  211.71
  12   1 -16  120.36  174.14
  12   1 -15  190.32  160.49
  12  -1  15   11.73  161.42
 -12   1  15  349.00  232.63
 -12  -1 -15  200.22  100.91
 -12   1  14  724.02  239.55
  12   1 -14  582.40  134.76
  12   1 -14  685.24  167.72
 -12   1  13  365.79  248.80
  12   1 -13  181.47  149.08
 -12  -1 -13  102.70  125.74
  12   1 -13   56.79  113.03
  12  -1  13  -35.17  157.20
  12   1 -12  359.39  103.29
 -12   1  12  204.44  204.23
  12   1 -12  340.31  145.81
 -12  -1 -12  489.07  132.75
  12   1 -11  227.01  150.43
 -12  -1 -11   69.30  142.61
  12   1 -10  -13.99  149.87
 -12  -1 -10 -162.26  150.32
 -12  -1  -9   31.96  160.52
  12   1  -9   72.61  143.34
 -12  -1  -8   37.01  159.78
 -12  -1  -7  555.33  175.23
  12   1  -6  190.30  122.38
 -12  -1  -6  412.04  177.81
 -12  -1  -5  891.08  213.12
 -12   1   5  688.41  137.25
  12   1  -5  592.22  151.47
 -12   1   5  752.01  208.29
 -12  -1  -5  530.02  189.75
  12  -1   4  233.38  151.70
 -12  -1  -4  473.43  182.28
 -12   1   4  136.86  197.43
 -12   1   4  458.32  143.92
  12   1  -4  374.14  146.54
 -12  -1  -4  197.12  192.34
 -12  -1  -3  414.00  198.10
 -12   1   3  631.68  208.10
  12  -1   3  496.64  142.62
 -12  -1  -3  415.55  197.14
 -12   1   3  359.99  282.98
  12   1  -3  176.81  145.00
 -12   1   3  530.59  129.75
  12  -1   2  513.74  130.19
 -12   1   2  844.32  140.34
 -12   1   2  948.87  277.78
  12   1  -2  610.54  160.07
 -12  -1  -2  674.38  207.24
 -12  -1  -2  886.17  220.42
 -12   1   2  760.01  233.78
 -12  -1  -1 1205.97  233.56
 -12  -1  -1 1087.77  216.35
 -12   1   1 1649.77  279.66
  12   1  -1 1181.46  171.26
  12   1  -1 1037.44  137.84
 -12   1   1 1270.20  210.65
 -12   1   1 1113.25  166.45
 -12   1   0 1476.97  227.09
 -12  -1   0 1591.70  237.04
 -12  -1   0 1230.59  257.62
 -12   1   0 1421.25  272.89
  12   0 -22  264.91  220.68
  12   0 -21 -110.89  184.31
  12   0 -20  295.86  193.54
  12   0 -20  308.10  147.26
  12   0 -19   44.35  123.68
  12   0 -19   81.43  170.73
  12   0 -18  186.26  172.21
  12   0 -18  284.54  126.45
  12   0 -17  117.31  167.34
  12   0 -17  -28.11  170.03
  12   0 -16  163.76  130.42
  12   0 -16  160.50  158.56
  12   0 -15  -97.67  225.05
  12   0 -15   18.90  226.28
  12   0 -14   79.53  135.97
  12   0 -14  -40.87  120.75
 -12   0 -13   84.96  110.74
  12   0 -13  137.98  133.40
  12   0 -13   75.73  115.77
 -12   0 -12   35.72  119.67
  12   0 -12  115.58  135.83
  12   0 -12   83.61   95.32
  12   0 -11  478.83  179.43
  12   0 -11  188.10   91.96
  12   0 -11  145.12  138.77
  12   0 -10   41.72   78.83
  12   0 -10   72.31  124.37
  12   0 -10 -103.59  186.30
 -12   0  -9  720.43  166.92
  12   0  -9  416.04  127.62
  12   0  -9  443.91  180.75
  12   0  -9  353.64   67.54
  12   0  -8  -75.85  170.17
  12   0  -8   13.02  168.33
 -12   0  -8  -26.27  168.43
  12   0  -7  602.38  134.53
 -12   0  -7  893.62  182.96
 -12   0  -6  521.02  199.01
  12   0  -6  157.57  131.26
  12   0  -5 1728.33  197.19
 -12   0  -5 1767.69  241.49
 -12   0  -4  385.68  231.83
  12   0  -4  479.37  147.24
 -12   0  -4  323.51  196.06
 -12   0  -3 5188.90  439.82
  12   0  -3 4665.68  323.47
 -12   0  -3 5559.99  364.71
 -12   0  -2  661.91  229.75
  12   0  -2  745.45  184.42
 -12   0  -2  558.59  224.07
  12   0  -1 7963.48  483.10
 -12   0  -1 9048.26  524.19
 -12   0  -1 9757.07  529.24
 -12   0   0  968.04  228.56
 -12   0   0  845.72  237.69
  11  24  -4   10.43  151.92
  11 -24   4  237.37  236.22
  11  24  -4  -59.71  203.33
 -11 -24  -4  258.23  276.00
  11  24  -4  -21.40  175.56
 -11 -24  -3  192.14  252.24
  11  24  -3   21.35  178.94
  11  24  -3  191.96  145.70
  11  24  -3  165.79  189.90
  11 -24   3  204.78  248.80
 -11 -24  -2  170.40  276.37
  11  24  -2  271.59  167.56
  11  24  -2  139.82  149.54
  11  24  -2  271.22  179.52
 -11 -24  -1  703.51  246.54
  11  24  -1  402.61  158.83
 -11  24   1  123.70  179.74
 -11 -24   0  398.03  289.96
 -11 -23  -8  214.95  242.73
 -11 -23  -8  241.39  158.68
  11  23  -8  530.10  218.58
  11 -23   8  369.54  267.88
  11  23  -8  175.95  161.91
 -11 -23  -7   39.91  226.49
  11  23  -7  252.69  222.06
  11 -23   7  185.69  262.58
  11  23  -7  264.09  155.61
  11  23  -7   28.42  147.36
 -11 -23  -7  -49.02  176.65
  11 -23   6  480.92  246.82
  11  23  -6  345.49  201.05
  11  23  -6  222.66  149.32
  11  23  -6  431.98  220.16
 -11 -23  -6  162.27  199.94
  11 -23   5 -285.77  239.62
  11  23  -5  116.88  157.18
  11  23  -5  116.39  167.22
  11 -23   5  206.26  175.14
 -11 -23  -5  314.60  264.91
  11  23  -5  275.18  211.50
  11 -23   4   53.98  174.10
 -11  23   4  274.30  181.21
  11  23  -4  110.81  151.63
  11 -23   4  318.13  238.66
  11  23  -4 -108.98  146.22
 -11 -23  -4  395.77  246.57
  11  23  -4  210.11  198.98
  11  23  -3  178.91  143.58
  11  23  -3  321.41  200.25
 -11 -23  -3 -129.18  240.92
  11  23  -3  -61.82  189.26
  11 -23   3  339.00  235.02
 -11 -23  -2  246.12  247.57
  11  23  -2  105.63  153.81
  11  23  -2   -1.40  173.65
  11  23  -2   15.67  162.26
  11 -23   2  -29.34  253.24
  11  23  -1  -54.31  240.67
  11  23  -1  -98.50  240.39
  11  23  -1  243.73  258.31
 -11 -23  -1 -128.93  238.13
 -11 -23   0  -77.88  158.44
  11 -22  10  -18.68  270.39
  11  22 -10  -33.44  272.02
 -11 -22 -10 -162.03  274.48
  11  22 -10  158.82  270.43
 -11 -22  -9   73.78  208.49
  11 -22   9   55.42  205.98
  11  22  -9  -66.38  205.87
  11  22  -9 -146.61  207.01
  11  22  -8  -78.09  197.19
  11  22  -8  149.79  210.05
  11  22  -8   26.83  196.23
 -11 -22  -8  -63.35  198.12
  11 -22   8 -200.82  196.40
  11  22  -7  -66.84  243.74
  11  22  -7  107.42  244.65
  11  22  -7  -64.74  261.25
 -11 -22  -7  -40.24  242.32
  11 -22   7  110.16  243.88
 -11 -22  -7  111.24  245.16
 -11 -22  -6    4.17  231.95
  11  22  -6   69.78  140.10
 -11 -22  -6  315.24  162.93
  11 -22   6   24.76  157.38
  11 -22   6  414.78  219.78
  11  22  -6  -94.65  134.04
  11  22  -6  -20.44  178.13
  11  22  -5   95.65  232.91
  11  22  -5  -18.89  249.27
  11 -22   5   43.41  232.47
 -11 -22  -5 -115.67  232.11
  11  22  -5  -85.89  232.60
  11 -22   4  145.21  263.26
 -11 -22  -4  351.84  242.82
  11  22  -4  154.65  134.63
  11  22  -4   27.44  147.42
  11 -22   4   33.69  171.29
  11  22  -4  152.38  184.58
  11 -22   3  197.82  183.02
  11  22  -3  -36.99  179.37
  11  22  -3   43.04  164.30
  11  22  -3   18.81  124.85
 -11 -22  -3  378.03  244.52
 -11  22   2  192.29  160.17
  11  22  -2   13.33  130.92
 -11 -22  -2  264.93  226.19
  11  22  -2  267.08  157.90
  11  22  -1   23.78  240.34
  11  22  -1  131.55  256.38
 -11 -22  -1 -195.02  237.47
 -11 -22   0   72.75  255.78
  11  21 -12   47.64  219.55
 -11 -21 -12  -84.79  174.94
  11  21 -12   44.99  157.87
  11 -21  12  148.61  278.43
  11  21 -11   55.01  224.15
 -11 -21 -11  -28.21  226.49
  11 -21  11 -212.05  222.59
  11  21 -11  -50.33  222.82
  11  21 -10  147.86  169.34
 -11 -21 -10  410.15  248.39
  11  21 -10  117.88  210.53
 -11 -21  -9   37.76  211.76
  11  21  -9  110.74  166.61
  11 -21   9  120.49  250.99
  11  21  -9  192.77  195.80
  11  21  -8  109.40  141.40
  11  21  -8  119.41  186.15
 -11 -21  -8  190.26  241.10
  11 -21   8   29.87  238.29
  11  21  -8  -92.50  136.23
  11  21  -7  160.61  176.75
  11  21  -7   76.10  143.77
 -11 -21  -7  -42.76  229.80
  11 -21   7  202.29  157.65
  11  21  -7   26.56  135.44
  11 -21   7  -61.48  249.50
  11  21  -6    5.20  128.37
  11 -21   6 -156.47  217.77
 -11 -21  -6   86.94  262.61
  11  21  -6  242.94  186.43
  11  21  -6   -1.97  138.75
  11 -21   6  200.13  171.93
  11  21  -5   70.19  132.78
  11  21  -5  -27.84  169.49
  11  21  -5  -88.95  145.98
  11 -21   5  315.54  234.13
  11 -21   5   30.26  171.17
 -11 -21  -5  113.28  262.17
  11  21  -4  233.90  175.37
 -11 -21  -4 -174.89  238.43
  11  21  -4  172.07  129.72
  11 -21   3  -15.80  173.26
  11  21  -3  217.43  123.84
  11  21  -3   -3.43  157.12
 -11 -21  -3   41.12  234.41
  11  21  -3   30.27  146.32
  11  21  -2  163.54  153.52
 -11 -21  -2  196.06  262.07
  11  21  -2  381.18  149.58
  11 -21   2  137.87  167.27
  11  21  -1  -68.71  273.11
  11  21  -1    0.51  257.81
 -11 -21  -1  262.63  254.41
  11 -21   1 -121.26  255.17
  11 -21   1 -306.96  258.61
 -11 -21   0   51.95  260.38
 -11  21   0  161.47  179.68
  11 -20  14  125.15  144.96
  11  20 -14  -91.80  145.91
  11 -20  13  149.85  304.06
  11  20 -13  204.16  206.31
  11  20 -13   93.74  165.71
  11  20 -12  166.35  150.42
 -11 -20 -12  -35.84  226.34
  11  20 -12  159.93  174.73
  11 -20  12   17.77  286.56
 -11 -20 -11  -19.33  226.19
  11  20 -11   14.16  222.49
  11 -20  11  280.54  222.34
  11  20 -11 -232.32  223.85
 -11 -20 -10  160.33  213.26
  11  20 -10 -235.87  211.41
  11  20 -10   58.20  210.03
 -11 -20  -9  -45.89  205.75
  11  20  -9  -47.40  132.61
  11  20  -9  181.24  188.71
  11 -20   9   93.59  270.69
  11 -20   8 -235.03  218.23
  11  20  -8  -23.19  135.95
 -11 -20  -8  343.31  217.77
  11  20  -8  264.28  192.80
  11  20  -7  271.00  190.48
  11 -20   7  105.92  252.80
 -11 -20  -7   18.98  230.88
  11  20  -7  -75.40  134.70
  11 -20   7   64.67  148.36
  11  20  -6  167.36  174.25
  11  20  -6   -2.71  136.07
  11 -20   6  131.38  252.87
  11  20  -6 -121.51  133.16
 -11 -20  -6   18.90  254.57
  11  20  -5  310.04  139.22
 -11 -20  -5  309.36  238.32
  11  20  -5  276.66  185.59
  11 -20   5   -5.19  162.49
  11  20  -5   66.80  147.18
  11 -20   5  403.78  267.39
 -11 -20  -4  332.08  231.23
  11 -20   4  173.01  187.13
  11  20  -4  144.08  129.01
  11  20  -4   -1.87  145.69
 -11 -20  -3  534.01  239.45
  11  20  -3  195.28  128.56
  11  20  -3  131.88  155.48
  11  20  -2  287.73  162.70
 -11 -20  -2  258.87  247.09
  11  20  -2  169.10  137.15
 -11  20   2  286.24  156.98
  11 -20   1   55.11  177.82
 -11 -20  -1  147.56  220.01
  11 -20   1   80.68  111.99
 -11  20   1  220.83  174.59
  11  20  -1   14.86  132.96
  11  20  -1 -104.73  158.71
 -11 -20   0   23.83  260.66
 -11  20   0  128.61  182.97
  11  19 -15  306.01  207.67
  11 -19  15  132.01  284.88
 -11 -19 -15   -1.34  196.67
  11  19 -15  105.09  153.04
 -11 -19 -15  163.09  162.61
 -11 -19 -14   81.42  197.14
  11  19 -14   22.39  137.06
 -11 -19 -14  152.71  166.70
  11  19 -14  -49.94  203.94
  11 -19  14  293.84  301.44
  11  19 -13  213.25  151.87
 -11 -19 -13  131.29  178.33
  11 -19  13  339.40  243.53
 -11 -19 -13  180.61  209.70
  11  19 -13  352.34  217.54
 -11 -19 -12 -189.71  204.73
  11 -19  12 -272.53  201.02
  11  19 -12 -223.59  202.43
  11  19 -12   56.43  201.47
 -11 -19 -11    7.83  233.29
  11  19 -11   63.31  139.11
  11 -19  11   60.46  255.08
  11  19 -11  -10.01  216.38
  11  19 -10    5.04  203.77
  11  19 -10   64.65  205.13
 -11 -19 -10 -153.28  206.88
  11 -19  10  -70.13  203.91
 -11 -19  -9  296.37  217.93
  11  19  -9   75.28  141.24
  11  19  -9   52.69  124.11
  11 -19   9  112.51  226.03
  11  19  -9  110.99  179.42
  11  19  -8  142.83  123.24
  11  19  -8 -106.38  132.51
  11 -19   8  138.79  257.88
  11  19  -8  102.04  185.71
 -11 -19  -8  149.46  216.85
  11 -19   7  255.59  229.68
 -11 -19  -7 -196.31  230.70
  11 -19   7  101.85  229.04
  11  19  -7   32.35  229.62
  11  19  -7 -107.12  238.35
  11  19  -7  -92.05  230.78
 -11 -19  -6  403.98  208.94
  11  19  -6  192.23  171.21
  11 -19   6  -72.09  160.30
  11  19  -6   19.48  124.16
  11  19  -6  -55.36  122.55
  11  19  -5   93.78  145.94
  11  19  -5    2.15  129.54
  11  19  -5  108.76  168.22
  11 -19   5   23.35  184.40
 -11 -19  -5  -14.37  227.90
  11  19  -4  213.99  130.05
  11 -19   4  111.40  163.92
  11  19  -4 -119.17  140.11
  11  19  -4  280.62  165.79
 -11 -19  -4   69.21  207.73
 -11 -19  -3  594.73  229.33
  11  19  -3  480.11  161.15
  11  19  -3  168.41  131.42
  11  19  -3  259.77  126.73
  11  19  -2  177.59  134.68
 -11 -19  -2   73.13  240.14
  11  19  -2   95.39  123.58
  11 -19   2  108.95  177.14
  11 -19   1   -0.79  249.53
  11 -19   1   -9.58  251.15
 -11 -19  -1  216.34  248.29
  11  19  -1    7.25  252.09
  11  19  -1  -99.58  262.43
 -11 -19   0  255.65  241.21
 -11  19   0  -57.66  158.30
 -11 -18 -16  143.64  199.02
  11 -18  16   37.43  269.98
  11  18 -16  -61.12  150.98
 -11 -18 -16  105.19  156.71
  11  18 -16  152.43  209.55
  11  18 -15  -21.97  203.91
  11  18 -15  101.75  151.20
 -11 -18 -15   89.21  196.66
 -11 -18 -15  132.20  173.22
  11 -18  15   95.65  294.83
 -11 -18 -14 -270.83  175.38
  11  18 -14   94.51  174.78
  11  18 -14   91.72  174.75
 -11 -18 -14   85.67  176.64
  11 -18  14  -42.48  173.61
  11  18 -13  198.44  150.81
 -11 -18 -13  -21.65  168.03
  11 -18  13  191.95  273.10
 -11 -18 -13   77.22  201.53
  11  18 -13  154.97  213.63
  11  18 -12   -0.82  188.27
 -11 -18 -12   29.15  191.24
 -11 -18 -12  -75.37  188.85
  11  18 -12  -26.30  189.09
  11  18 -11 -117.52  179.20
 -11 -18 -11  260.96  207.31
  11  18 -11   39.00  154.69
 -11 -18 -11  -39.19  184.21
  11 -18  11 -139.25  238.80
  11 -18  10  -55.44  197.55
  11  18 -10 -107.47  197.37
 -11 -18 -10 -189.63  200.35
 -11 -18 -10 -131.75  197.21
  11  18 -10    3.53  198.71
  11  18  -9 -179.41  203.20
  11 -18   9   85.00  203.50
 -11 -18  -9 -426.37  205.77
  11  18  -9 -176.65  204.63
  11 -18   8 -216.48  216.43
  11  18  -8  252.61  217.58
  11  18  -8 -207.54  216.18
  11 -18   8  -69.31  216.16
  11  18  -8 -137.90  221.36
 -11 -18  -8 -102.24  218.08
 -11 -18  -7  103.06  205.56
  11  18  -7  248.41  196.40
  11  18  -7  212.95  121.34
  11 -18   7  165.52  221.43
  11 -18   7  198.79  156.43
  11  18  -7   38.17  137.24
  11 -18   6   50.07  225.23
 -11 -18  -6  556.44  223.16
  11  18  -6  330.08  193.85
  11  18  -6  182.75  131.34
  11 -18   6  -37.44  160.71
  11  18  -6   79.59  139.38
  11  18  -5 1038.06  208.33
 -11 -18  -5  589.67  222.22
  11  18  -5  539.59  151.42
  11  18  -5  788.10  147.62
  11  18  -4  378.02  141.86
 -11 -18  -4  539.95  245.17
  11  18  -4  155.52  145.74
  11 -18   4  362.26  162.00
  11  18  -3  181.85  151.67
 -11 -18  -3  114.13  243.88
 -11  18   3  504.71  164.76
  11  18  -3  412.63  138.99
 -11 -18  -2   43.39  256.37
  11 -18   2  109.78  191.08
 -11  18   2  115.31  162.32
  11  18  -2  110.74  115.04
  11  18  -2 -119.73  134.34
  11  18  -1  -96.11  250.99
  11  18  -1  175.36  258.80
 -11  18   1 -110.44  248.94
  11 -18   1  -91.47  248.44
 -11 -18  -1  117.77  247.08
  11 -18   1  136.91  249.45
 -11 -18   0   11.34  259.01
 -11  18   0  272.27  171.86
 -11 -17 -17 -156.92  195.54
  11  17 -17  181.03  194.92
  11  17 -17 -234.30  196.33
  11 -17  17 -109.77  194.14
 -11 -17 -17  -90.06  196.15
  11  17 -16   37.72  139.64
 -11 -17 -16 -237.74  197.59
  11  17 -16  255.70  209.09
  11 -17  16  -32.07  261.86
 -11 -17 -16   22.72  164.78
  11 -17  15   94.90  282.82
  11  17 -15  113.43  198.76
  11  17 -15   93.04  142.80
 -11 -17 -15  -68.98  174.30
 -11 -17 -15 -115.75  190.79
 -11 -17 -14   85.50  203.96
  11  17 -14  153.87  191.12
  11 -17  14 -171.14  260.27
  11  17 -14   97.28  139.60
 -11 -17 -14   17.53  165.41
 -11 -17 -13  700.84  199.91
  11 -17  13  356.27  276.26
  11  17 -13  659.98  215.01
  11  17 -13  479.95  140.48
 -11 -17 -13  220.07  190.84
  11  17 -12  114.27  135.63
  11  17 -12  475.00  203.58
 -11 -17 -12  444.27  173.68
 -11 -17 -12  414.83  224.29
  11 -17  11  715.44  250.27
  11  17 -11  849.11  226.12
  11  17 -11  889.92  160.92
 -11 -17 -11 1188.67  230.98
 -11 -17 -11  796.93  196.69
 -11 -17 -10  720.17  227.47
  11 -17  10  877.42  243.35
  11  17 -10  664.99  150.33
 -11 -17 -10  850.73  196.83
  11  17 -10  672.83  224.78
  11  17  -9  412.05  135.97
 -11 -17  -9  585.82  203.87
  11 -17   9  464.04  228.53
  11  17  -9  578.21  194.34
  11  17  -9  230.04  137.57
  11 -17   9  308.82  155.84
 -11 -17  -8  563.96  185.60
  11 -17   8  704.44  232.23
  11  17  -8  422.56  137.17
  11  17  -8  543.98  148.47
  11  17  -8 1033.71  203.69
  11 -17   8  617.76  151.44
  11  17  -7  -89.98  226.61
  11 -17   7   85.42  224.97
  11  17  -7  -64.30  225.36
 -11 -17  -7  235.73  226.16
  11  17  -7    0.22  228.62
  11 -17   7 -139.04  225.47
 -11 -17  -6  -37.93  197.87
  11 -17   6 -147.41  194.08
  11  17  -6  131.64  192.62
  11  17  -6   -0.98  113.95
  11 -17   6  251.89  169.72
 -11 -17  -5   86.49  164.57
  11 -17   5  -31.26  181.81
 -11 -17  -5  128.75  188.46
  11  17  -5  -36.32  108.10
  11  17  -5   33.36  128.26
  11  17  -5  142.33  165.22
 -11 -17  -4  579.83  251.64
  11 -17   4  528.52  189.87
  11  17  -4  490.34  126.55
 -11 -17  -3  225.84  221.21
  11  17  -3  294.69  132.75
  11  17  -3   71.41  149.72
  11 -17   3  -75.26  159.53
  11  17  -2  359.72  137.26
  11  17  -2  177.70  149.60
 -11 -17  -2  672.33  237.39
  11  17  -1  289.44  151.49
  11  17  -1  595.51  130.79
  11 -17   1  760.73  186.74
  11 -17   1  479.19  125.57
 -11  17   1  650.61  170.28
 -11 -17  -1  578.19  251.98
 -11 -17   0  460.36  238.56
 -11  17   0  189.60  194.24
  11  16 -18  281.14  201.03
 -11 -16 -18  261.58  157.18
  11  16 -18   52.38  142.63
  11 -16  18  137.95  221.13
 -11 -16 -17  124.41  172.11
 -11 -16 -17  123.67  262.50
  11  16 -17  368.78  197.86
  11  16 -17   23.02  145.49
  11 -16  17  -67.31  249.87
  11  16 -16   71.64  140.45
 -11 -16 -16  123.16  169.83
  11  16 -16   81.91  227.22
  11 -16  16 -142.54  261.70
 -11 -16 -16  122.38  209.28
 -11 -16 -15  -76.66  185.84
  11 -16  15  -34.11  251.18
  11  16 -15  139.11  211.04
 -11 -16 -15   64.03  167.30
  11  16 -15  171.65  132.42
 -11 -16 -14   -8.02  188.50
  11  16 -14 -227.58  187.17
 -11 -16 -14  -82.71  189.16
  11 -16  14 -272.28  186.31
  11  16 -14  -92.89  187.63
 -11 -16 -13  -92.50  200.02
 -11 -16 -13  -29.23  198.81
  11 -16  13 -222.60  196.80
  11  16 -13 -214.20  197.78
  11  16 -13   27.74  197.72
  11  16 -12  -50.68  200.25
 -11 -16 -12 -166.64  202.47
  11  16 -12  -33.78  199.67
 -11 -16 -12 -276.03  200.75
  11 -16  12   74.00  199.24
  11  16 -11   79.26  118.63
 -11 -16 -11   -2.49  174.23
  11  16 -11  129.08  208.05
 -11 -16 -11  198.32  176.53
  11 -16  11  -47.97  244.44
 -11 -16 -10  291.80  203.94
  11 -16  10 -148.79  245.11
  11  16 -10   81.84  122.89
  11  16 -10   22.48  190.78
  11 -16   9  465.36  228.90
  11  16  -9  110.13  117.34
 -11 -16  -9   73.04  225.46
  11  16  -9  427.31  206.45
  11 -16   9  309.02  157.35
  11  16  -8  -54.84  182.56
  11  16  -8    8.70  122.17
  11  16  -8  188.26  132.64
  11 -16   8  208.25  201.62
 -11 -16  -8  470.23  214.16
  11 -16   8  200.66  154.84
  11  16  -7  220.69  202.72
  11 -16   7  286.19  153.25
 -11 -16  -7  454.01  165.76
 -11 -16  -7  209.89  205.40
  11  16  -7  438.02  121.88
  11  16  -7  362.38  125.07
  11  16  -6  441.86  184.18
  11  16  -6  144.01  106.91
  11 -16   6  210.98  167.28
  11  16  -6  226.84  127.66
 -11 -16  -6  379.07  185.23
  11 -16   5  252.19  175.43
  11  16  -5  185.14  118.17
  11  16  -5    0.99  139.27
 -11 -16  -5  357.40  199.90
  11 -16   4  457.50  160.45
  11  16  -4  270.34  137.35
  11  16  -4  282.39  118.28
 -11 -16  -4  198.28  194.57
  11 -16   3   14.30  176.56
 -11 -16  -3  156.54  216.58
  11  16  -3   61.64  116.13
  11  16  -3   51.58  134.30
 -11 -16  -2  307.99  241.67
  11  16  -2  222.58  117.84
  11 -16   2  177.50  100.42
  11 -16   2  248.97  183.84
  11  16  -2   27.60  146.48
  11  16  -1  173.45  115.99
  11  16  -1   35.98  142.42
  11 -16   1  200.28  155.58
  11 -16   1   -0.16  105.32
 -11 -16  -1   92.01  204.37
 -11 -16   0  464.49  241.37
 -11  16   0   27.16  153.60
  11  15 -19  -21.83  162.91
 -11 -15 -19  -92.99  163.54
  11  15 -19  139.30  164.69
  11 -15  19 -112.90  163.25
  11  15 -18   80.01  226.48
 -11 -15 -18  217.84  172.33
  11  15 -18  -65.47  140.64
 -11 -15 -18  -83.81  160.22
  11 -15  18  404.50  252.10
 -11 -15 -17 -142.31  195.68
 -11 -15 -17  -12.24  194.65
  11  15 -17  208.24  194.13
  11 -15  17  -38.87  193.94
  11  15 -17  -16.61  196.13
 -11 -15 -16  -34.50  170.85
 -11 -15 -16  -29.27  207.66
  11  15 -16  226.75  137.28
  11 -15  16  430.86  280.20
  11  15 -16  148.50  204.29
 -11 -15 -15  155.44  182.66
  11  15 -15  294.10  144.03
  11  15 -15   27.12  213.30
 -11 -15 -15   76.68  190.63
  11 -15  15  125.83  271.22
 -11 -15 -14  291.62  186.31
  11 -15  14  104.96  275.60
 -11 -15 -14  261.60  206.02
  11  15 -14  280.05  213.26
  11  15 -14  132.50  125.73
  11 -15  13  650.10  280.01
 -11 -15 -13  730.49  215.94
  11  15 -13  222.94  128.83
  11  15 -13  715.77  222.96
 -11 -15 -13  371.58  194.35
  11 -15  12  833.50  244.65
  11  15 -12  805.01  204.71
 -11 -15 -12  775.75  203.48
  11  15 -12  561.45  146.00
 -11 -15 -12  449.55  182.04
  11  15 -11  396.71  115.71
 -11 -15 -11  555.52  174.43
 -11 -15 -11  502.14  205.79
  11  15 -11  785.70  235.40
  11 -15  11  540.83  241.47
  11  15 -10  280.96  204.73
  11  15 -10  275.00  114.97
  11 -15  10    8.46  236.43
 -11 -15 -10  325.53  177.72
 -11 -15 -10  299.53  185.18
  11 -15  10  328.75  129.71
 -11 -15  -9   39.66  158.26
  11 -15   9  498.44  217.31
  11 -15   9  318.13  131.69
  11  15  -9 -246.46  196.71
  11  15  -9  116.74  125.98
 -11 -15  -9 -126.98  190.03
  11  15  -9   85.30  113.67
 -11 -15  -8   88.55  193.43
  11 -15   8 -213.74  192.43
  11  15  -8 -173.22  193.33
  11  15  -8  -84.17  192.03
  11  15  -7  444.63  203.19
  11  15  -7   68.69  105.31
 -11 -15  -7  220.40  188.13
  11 -15   7  136.92  152.58
  11  15  -6  -54.06  131.65
  11  15  -6  111.62  181.33
  11 -15   6 -108.36  148.33
  11  15  -6    9.76  103.23
 -11 -15  -6  343.24  210.83
  11 -15   5  342.30  193.95
  11  15  -5  319.09  112.70
  11  15  -5  374.86  149.90
 -11 -15  -5  339.02  171.34
  11 -15   5  315.43  166.59
  11  15  -4  142.79  111.57
  11  15  -4  -29.05  136.68
  11 -15   4  174.08  177.57
 -11 -15  -4 -128.83  190.54
 -11 -15  -3   85.72  207.90
  11  15  -3  101.24  132.28
  11  15  -3   45.85  114.52
  11 -15   3  -63.07  167.53
 -11 -15  -2  250.22  223.82
  11  15  -2  -35.08  106.25
  11 -15   2  -18.83  164.91
  11 -15   2    1.53   94.02
  11  15  -2  137.51  132.94
  11 -15   1  -33.63   92.25
  11  15  -1   89.50  115.85
 -11 -15  -1   61.41  213.61
 -11  15   1    3.33  150.98
  11  15  -1   38.93  127.04
  11 -15   1  -88.42  165.49
 -11 -15   0  173.48  134.73
 -11  15   0  -85.51  135.80
  11 -14  20 -151.65  157.97
  11  14 -20  -60.78  157.03
 -11 -14 -20   13.99  157.13
  11  14 -20   70.36  158.62
 -11 -14 -19   24.79  176.30
  11  14 -19  347.27  144.94
  11  14 -19  309.44  263.07
  11 -14  19  351.86  280.80
  11  14 -18  140.77  141.68
 -11 -14 -18  396.71  169.12
  11 -14  18  170.21  253.58
 -11 -14 -17   17.38  181.49
 -11 -14 -17  175.92  173.71
  11  14 -17  156.92  141.21
  11  14 -17  244.54  230.28
  11 -14  17  101.01  237.06
 -11 -14 -16  161.85  182.26
  11 -14  16  -22.41  266.22
 -11 -14 -16   52.45  153.09
  11  14 -16  -50.23  129.98
  11  14 -16  -37.57  213.08
  11 -14  15  596.56  236.71
  11  14 -15  -78.77  240.54
 -11 -14 -15  329.74  167.11
  11  14 -15   12.47  129.18
 -11 -14 -15  167.00  171.14
 -11 -14 -14 -105.41  199.91
  11  14 -14 -213.86  197.94
 -11 -14 -14  -54.85  199.91
  11  14 -14 -114.99  198.99
  11 -14  14  112.52  197.41
  11  14 -13  311.93  219.69
 -11 -14 -13  251.85  174.09
 -11 -14 -13  250.59  190.51
  11 -14  13  187.55  236.98
  11  14 -13  140.90  120.23
  11 -14  12   -0.11  208.21
  11  14 -12  -15.45  208.98
  11  14 -12  -65.70  208.78
 -11 -14 -12  155.55  211.15
 -11 -14 -12 -128.03  210.41
  11  14 -11  779.33  210.75
  11  14 -11  584.59  139.31
 -11 -14 -11  865.77  228.51
 -11 -14 -11  408.92  175.88
  11  14 -10  224.21  183.58
  11  14 -10  -35.38  124.88
 -11 -14 -10   -5.08  158.79
  11  14 -10   -4.85   82.39
 -11 -14 -10  168.84  202.46
  11 -14  10  207.69  218.25
  11 -14  10  296.63  111.25
  11  14  -9  633.83  145.14
  11 -14   9  732.71  226.50
  11  14  -9  532.49  103.71
 -11 -14  -9  608.52  228.83
 -11 -14  -9  753.87  177.47
  11  14  -9  651.20  229.82
  11 -14   9  745.97  134.23
  11 -14   8  394.34  211.28
  11 -14   8  410.17  153.76
 -11 -14  -8  644.47  172.70
 -11 -14  -8  491.31  156.85
  11  14  -8  568.46  130.75
  11  14  -8  211.55  219.83
  11  14  -7  648.99  130.91
  11 -14   7  485.36  213.56
 -11 -14  -7  627.94  155.39
 -11 -14  -7  400.88  186.04
 -11 -14  -6  391.10  179.70
  11  14  -6  376.30  117.09
  11 -14   6  350.02  159.84
  11  14  -6   99.30  138.98
  11 -14   6   13.14  179.45
  11 -14   5  166.31  153.75
  11 -14   5  262.69  202.62
 -11 -14  -5  195.71  210.95
  11  14  -5  314.26  106.89
  11  14  -4  116.16  114.96
  11  14  -4  268.04  135.65
 -11 -14  -4  199.21  196.31
  11 -14   4  212.46  147.16
  11  14  -3  141.42  143.84
  11  14  -3  292.77  122.46
 -11 -14  -3  332.04  199.73
  11 -14   3  478.49  156.06
  11 -14   2  198.88  166.02
  11  14  -2   14.13  108.88
  11  14  -2  171.23  130.71
 -11  14   1   85.57  151.62
  11  14  -1   98.84  114.61
  11 -14   1  -81.65  164.30
  11  14  -1  -99.75  136.80
 -11 -14  -1   14.59  234.82
 -11 -14   0   64.14  236.70
 -11  14   0  244.92  167.81
  11  13 -21 -214.75  142.52
 -11 -13 -21   50.66  145.05
 -11 -13 -21  334.51  155.83
  11  13 -21 -109.41  244.10
  11 -13  21  199.43  222.07
 -11 -13 -20   20.11  160.87
  11  13 -20  -25.01  162.62
  11 -13  20 -228.34  162.23
 -11 -13 -19 -108.87  156.62
  11  13 -19 -120.23  158.18
  11 -13  19  161.73  157.16
 -11 -13 -18 -105.77  140.07
  11  13 -18   70.72  142.07
 -11 -13 -18   20.60  140.88
  11 -13  18 -259.00  140.74
  11 -13  17  -53.90  190.13
  11  13 -17 -225.17  189.80
 -11 -13 -17  -89.03  191.03
 -11 -13 -17 -146.09  190.21
  11  13 -17   95.09  192.22
  11 -13  16  126.03  236.14
 -11 -13 -16  102.70  170.49
 -11 -13 -16    1.33  209.73
  11  13 -16   34.52  210.40
  11  13 -16  107.51  131.91
  11  13 -15 -156.72  189.39
 -11 -13 -15  142.07  189.34
  11  13 -15 -212.39  187.58
 -11 -13 -15    2.93  189.05
  11 -13  15 -171.63  187.41
 -11 -13 -14  447.50  185.43
  11 -13  14  205.26  246.50
  11  13 -14  112.85  132.33
 -11 -13 -14  381.17  187.30
  11  13 -14  315.69  201.19
 -11 -13 -13  239.40  172.07
 -11 -13 -13   36.24  159.24
  11  13 -13  267.18  120.77
  11 -13  13  323.91  235.30
  11  13 -13  224.43  215.46
  11  13 -12  549.43  199.60
 -11 -13 -12  494.83  200.48
  11 -13  12  417.17  235.58
 -11 -13 -12  569.11  164.18
  11  13 -12  428.30  128.34
  11 -13  11   82.24  216.01
  11  13 -11   62.37  177.62
  11  13 -11   42.96  112.15
 -11 -13 -11  473.59  184.06
 -11 -13 -11   48.50  157.05
  11  13 -10  334.26  120.78
 -11 -13 -10  667.54  198.30
  11  13 -10  720.92  187.85
 -11 -13 -10  632.83  166.59
  11 -13  10  374.99  213.80
  11  13 -10  350.24   82.60
  11  13  -9 -145.85  158.06
  11 -13   9  -57.85  158.89
  11  13  -9  -18.19  159.17
 -11 -13  -9  -37.13  159.98
  11 -13   9  105.60  159.61
  11  13  -9 -140.73  160.18
 -11 -13  -9  315.49  160.68
  11 -13   8  776.46  150.91
  11  13  -8  486.56  199.40
  11  13  -8  515.19  125.74
 -11 -13  -8  451.91  206.16
 -11 -13  -8  539.69  161.99
  11 -13   8  548.92  234.20
  11  13  -8  591.33  115.21
  11  13  -7   49.32  110.56
  11 -13   7  176.77  139.96
  11  13  -7   -3.23  199.08
 -11 -13  -7  239.76  143.17
  11 -13   7  284.55  200.60
 -11 -13  -7  205.52  163.26
 -11 -13  -6  429.56  199.84
  11 -13   6  190.38  183.94
  11  13  -6  343.74  118.72
 -11 -13  -6  266.70  140.77
 -11 -13  -5  292.91  199.31
  11 -13   5   -0.75  189.42
  11  13  -5   32.63  120.24
  11  13  -5   54.10  110.39
  11  13  -4  370.45  123.16
 -11 -13  -4   68.04  206.61
  11  13  -4  201.53  116.25
  11 -13   4  137.72  152.51
  11  13  -3   91.02  132.87
  11 -13   3   15.77  149.27
  11  13  -3  157.66  112.99
 -11 -13  -3  -31.95  195.81
 -11  13   2  246.89  144.03
  11  13  -2  301.38  108.65
 -11 -13  -2   70.47  226.72
  11 -13   2  337.46  133.55
  11  13  -1   91.80  208.77
 -11 -13  -1 -105.86  205.91
 -11 -13   0   85.44  125.81
 -11  13   0 -200.75  126.64
  11  12 -21  -68.85  218.36
  11 -12  21  284.95  264.25
 -11 -12 -21   41.82  145.26
 -11 -12 -21   57.22  149.90
  11  12 -21   19.31  152.95
  11  12 -20  -51.82  150.28
  11  12 -20    1.83  231.56
  11 -12  20  138.20  263.89
 -11 -12 -20  221.70  151.25
  11  12 -19   89.63  156.80
  11 -12  19 -218.87  156.02
 -11 -12 -19 -115.91  154.94
 -11 -12 -18  387.82  168.23
  11  12 -18  157.96  136.41
  11 -12  18 -111.07  266.43
  11  12 -17  135.99  199.79
 -11 -12 -17  281.61  177.22
  11 -12  17  400.04  268.13
 -11 -12 -17  468.18  196.47
  11  12 -17  217.15  135.49
  11  12 -16  291.75  185.94
  11 -12  16  143.81  268.99
 -11 -12 -16  573.89  232.02
 -11 -12 -16  475.53  167.72
  11  12 -16  410.02  133.66
  11  12 -15  664.85  209.90
  11  12 -15  291.73  122.45
 -11 -12 -15  564.17  195.42
 -11 -12 -15  635.59  191.64
  11 -12  15  764.34  251.90
  11  12 -14 -110.63  188.57
  11 -12  14  199.32  248.80
 -11 -12 -14  273.76  212.12
 -11 -12 -14  170.79  159.30
  11  12 -14   91.42  119.19
  11 -12  13  150.77  247.85
  11  12 -13   59.97  167.83
 -11 -12 -13  255.48  186.30
  11  12 -13  -13.64  118.37
 -11 -12 -13    4.38  165.52
  11  12 -12   74.44  107.17
 -11 -12 -12   22.35  158.04
  11 -12  12   25.82  237.17
  11  12 -12   -9.99  183.97
 -11 -12 -12  141.81  203.92
  11 -12  11  189.82  213.73
 -11 -12 -11  129.66  178.30
 -11 -12 -11  281.78  155.85
  11  12 -11  -24.04  108.70
  11  12 -11   18.57  185.26
 -11 -12 -10   86.68  180.12
  11 -12  10   90.93  205.57
  11  12 -10 -114.03  165.30
 -11 -12 -10   60.76  135.16
  11  12 -10   80.71  110.10
  11  12 -10   87.61   68.32
  11  12  -9   23.70  110.55
  11 -12   9  180.32  115.53
 -11 -12  -9  -20.54  167.88
  11  12  -9  221.10   83.64
 -11 -12  -9   37.63  135.24
  11  12  -9  -27.38  157.33
  11  12  -8   45.79  175.36
  11 -12   8 -133.09  175.92
  11  12  -8  -68.81  176.39
  11  12  -8  -31.17  174.16
  11 -12   8   28.59  174.94
 -11 -12  -8  141.53  176.24
 -11 -12  -8  -67.61  175.96
  11  12  -7  -21.73  104.37
 -11 -12  -7  223.73  174.01
  11 -12   7  238.98  134.62
  11  12  -7  -41.09  161.53
  11 -12   7  249.19  192.66
 -11  12   7  142.20   78.69
  11  12  -7  -28.29  104.10
 -11 -12  -7  -17.77  129.31
  11  12  -6   55.26  116.56
 -11 -12  -6   78.46  199.28
 -11 -12  -6   67.63  126.21
  11 -12   6  175.02  175.53
  11  12  -6 -183.51  107.56
  11  12  -5   59.20  110.32
 -11 -12  -5  243.57  196.51
 -11 -12  -5  -40.31  127.50
  11  12  -5   69.10  112.34
  11 -12   5 -156.91  195.53
 -11 -12  -4   76.02  128.34
 -11 -12  -4  229.74  193.34
 -11  12   4  150.52   75.92
  11 -12   4   26.35  186.98
  11  12  -4  202.46  113.01
  11  12  -4  152.79  119.26
 -11 -12  -3  953.68  250.46
 -11  12   3 1170.01  187.69
 -11  12   3  592.23   88.64
  11  12  -3  775.50  136.99
 -11  12   0 -139.13  117.53
 -11 -12   0  127.35  116.87
 -11 -12   0   43.45  117.21
 -11  12   0   31.29  117.91
  11  11 -22  -27.21  233.36
 -11 -11 -22   91.61  140.29
  11 -11  22  -45.46  219.97
 -11 -11 -21   68.27  154.52
  11  11 -21  276.60  153.41
  11 -11  21  -62.20  279.39
  11  11 -21    7.36  229.08
  11  11 -20  -59.96  172.08
  11 -11  20  115.39  173.77
  11  11 -20  -44.16  173.43
 -11 -11 -20 -107.73  171.04
  11  11 -19   37.58  145.89
 -11 -11 -19  434.53  159.49
  11 -11  19  -48.28  239.44
  11  11 -18  149.86  129.33
 -11 -11 -18  183.58  166.14
  11 -11  18   47.56  259.92
 -11 -11 -17  310.51  166.16
  11  11 -17  355.80  135.55
 -11 -11 -17  411.81  183.20
  11 -11  17  435.67  241.12
  11  11 -17  474.46  184.38
 -11 -11 -16  252.87  209.08
  11  11 -16  110.84  179.78
 -11 -11 -16  405.97  159.50
  11  11 -16  287.46  137.43
  11 -11  16  159.35  255.60
 -11 -11 -15  316.50  156.55
  11 -11  15   78.41  247.59
  11  11 -15  220.19  128.71
  11  11 -15  536.30  195.30
 -11 -11 -15  273.45  208.02
  11  11 -14  337.77  203.05
  11  11 -14  409.84  125.02
 -11 -11 -14  716.35  185.24
  11 -11  14   62.03  268.80
 -11 -11 -14  477.84  154.53
 -11 -11 -13  151.03  171.85
 -11 -11 -13  275.30  144.45
  11  11 -13   88.91  112.23
  11 -11  13   12.76  249.31
  11  11 -13  322.61  172.89
 -11 -11 -12  291.42  154.46
 -11 -11 -12  186.54  181.46
  11  11 -12   -8.23  115.91
  11 -11  12   83.27  245.27
  11  11 -12  346.55  194.73
 -11 -11 -11   42.83  139.04
  11  11 -11    8.65  161.85
  11 -11  11 -130.21  210.85
 -11 -11 -11  339.77  167.10
  11  11 -11  129.36  112.61
 -11 -11 -10   28.79  167.09
  11  11 -10  208.09  102.27
 -11 -11 -10   22.57  139.79
  11  11 -10   19.50  160.85
 -11 -11  -9  346.42  172.28
  11  11  -9  114.18   76.06
  11  11  -9   72.52  111.30
 -11 -11  -9  147.82  118.84
  11  11  -9  -96.04  163.16
  11 -11   8  251.99  132.47
 -11 -11  -8  440.20  188.69
  11  11  -8  258.08  165.73
 -11 -11  -8  254.35  132.75
  11  11  -8  240.11   88.85
  11  11  -8  469.35  115.46
  11 -11   8  357.36  210.06
 -11 -11  -7   26.12  122.70
  11 -11   7  116.32  188.76
  11  11  -7   24.19  114.66
 -11 -11  -7 -135.24  183.17
  11  11  -7  102.91   97.66
  11  11  -7  209.68  159.64
  11  11  -6  502.02  123.25
  11  11  -6  510.41  113.74
 -11 -11  -6  484.42  127.68
 -11 -11  -6  310.48  187.03
  11  11  -5  256.46  112.48
 -11 -11  -5  291.47  128.36
  11  11  -5  131.86  122.18
 -11 -11  -5  245.94  189.45
 -11  11   5  234.35   81.84
 -11 -11  -4 1123.30  269.63
  11  11  -4 1036.89  135.04
 -11  11   4 1074.52  104.34
  11  11  -4  756.76  142.70
 -11 -11  -4 1051.99  141.69
 -11 -11   0 -158.49  120.52
  11 -10  22 -207.08  147.02
  11  10 -22   50.51  144.29
 -11 -10 -22   88.39  142.63
 -11 -10 -21   75.39  136.35
  11  10 -21   65.98  145.17
  11 -10  21   79.12  238.99
  11  10 -21 -175.77  192.99
 -11 -10 -20   18.79  151.21
  11  10 -20  -86.17  152.64
  11 -10  20 -168.26  154.24
  11 -10  19 -479.10  160.76
 -11 -10 -19   -2.08  158.38
  11  10 -19  -33.86  160.95
  11  10 -19   59.28  159.46
 -11 -10 -18  152.37  162.35
  11  10 -18   93.43  135.86
  11 -10  18  -65.26  265.24
  11  10 -18 -162.31  214.13
  11  10 -17 -120.14  155.72
 -11 -10 -17  -56.72  155.80
  11 -10  17   21.19  156.34
  11  10 -17   -9.61  157.80
 -11 -10 -17  -20.43  155.37
  11  10 -16  -37.36  183.05
 -11 -10 -16  183.22  159.35
  11 -10  16   74.97  237.31
 -11 -10 -16   40.51  176.88
  11  10 -16   15.15  133.14
 -11 -10 -15  212.15  152.73
  11 -10  15  -26.76  254.58
  11  10 -15  260.00  123.74
 -11 -10 -15  146.09  202.63
  11  10 -15   64.89  188.30
  11  10 -14  108.55  174.99
  11 -10  14   -3.17  175.04
 -11 -10 -14  -45.99  176.26
  11  10 -14  -61.02  176.84
 -11 -10 -14  -37.42  175.61
 -11 -10 -13  379.06  154.24
  11  10 -13  430.61  117.38
 -11 -10 -13  495.36  182.28
  11 -10  13  571.18  246.36
  11  10 -13  556.69  203.39
  11  10 -12  124.42  104.85
  11  10 -12   66.79  175.78
 -11 -10 -12  207.93  170.50
  11 -10  12  -12.46  229.52
 -11 -10 -12   -2.64  133.93
 -11 -10 -11  628.68  174.65
 -11 -10 -11  516.35  144.60
  11  10 -11  660.49  182.51
  11  10 -11  607.37  115.66
 -11 -10 -10   58.15  125.89
 -11 -10 -10  109.05  160.05
  11  10 -10  149.33  167.04
  11  10 -10  130.96  112.04
  11  10  -9  248.05  161.40
 -11 -10  -9  276.56  124.03
  11  10  -9  376.64  114.24
 -11 -10  -9  330.36  179.20
 -11 -10  -8  325.52  174.89
  11  10  -8  259.59   83.22
  11  10  -8  557.44  186.72
 -11 -10  -8  327.12  120.03
  11  10  -8  429.40  119.76
 -11 -10  -7  240.15  174.90
 -11 -10  -7  181.47  110.64
 -11 -10  -6  105.64  114.55
  11  10  -6  114.24  101.58
 -11 -10  -6 -158.22  191.28
 -11 -10  -5    7.54  179.99
 -11  10   0  134.66   99.15
 -11 -10   0   46.18   91.17
 -11 -10   0  522.37  255.48
  11  -9  23  295.40  231.30
 -11  -9 -23   56.11  141.72
  11   9 -23   26.30  146.34
  11   9 -23    8.67  207.67
  11  -9  22  -77.98  257.00
  11   9 -22   50.96  156.57
 -11  -9 -22  113.23  130.06
  11   9 -22  196.57  222.24
  11  -9  21  103.47  248.39
 -11  -9 -21  226.33  142.97
  11   9 -21  312.07  203.55
  11   9 -20  295.63  213.65
 -11  -9 -20  278.61  150.27
  11  -9  20  394.08  261.91
  11   9 -20  251.76  142.07
 -11  -9 -19  231.77  162.74
  11   9 -19  164.76  179.57
  11  -9  19  -47.76  236.68
  11   9 -19  159.03  137.84
  11   9 -18   93.69  188.50
  11  -9  18  203.66  246.43
  11   9 -18  253.04  134.19
 -11  -9 -18  299.23  165.66
 -11  -9 -17  213.47  159.47
  11   9 -17  325.51  124.35
  11   9 -17  303.33  181.01
  11  -9  17  508.35  221.99
 -11  -9 -16  180.85  153.71
 -11  -9 -16   43.71  166.70
  11  -9  16   -1.09  250.63
  11   9 -16  166.02  127.43
  11   9 -16  -63.15  197.41
  11   9 -15  112.10  174.70
 -11  -9 -15   85.28  136.35
 -11  -9 -15   85.66  190.37
  11   9 -15  222.33  119.41
  11  -9  15  129.65  251.32
  11   9 -14  -52.73  115.38
  11   9 -14   51.45  160.60
 -11  -9 -14   68.92  148.49
  11  -9  14  267.79  251.08
 -11  -9 -14  -36.67  179.70
  11   9 -13  -37.01  169.34
  11   9 -13    2.86  167.89
 -11  -9 -13   58.23  167.76
 -11  -9 -13  -38.81  169.08
  11  -9  13 -137.71  167.89
 -11  -9 -12   16.96  129.35
  11   9 -12   -6.28  173.68
 -11  -9 -12    0.21  173.85
  11   9 -12   81.04  110.89
  11  -9  12  130.58  217.56
 -11  -9 -11   45.95  150.82
 -11  -9 -11  121.25  128.70
  11   9 -11   62.31  107.58
  11   9 -11   69.27  165.52
  11   9 -10  185.95  180.77
 -11  -9 -10  150.86  150.19
 -11  -9 -10  239.95  119.42
 -11  -9  -9  327.55  184.92
 -11  -9  -2   -8.32  210.02
 -11  -9  -1  809.88  224.99
 -11  -9   0   23.22  228.16
 -11   9   0  158.22  100.82
 -11   9   0   28.48  145.78
 -11   9   0   27.57   80.19
 -11  -9   0   92.75   91.67
  11  -8  23  162.40  200.21
 -11  -8 -23  591.24  169.06
  11   8 -23  332.37  225.96
  11   8 -23   90.03  147.61
  11  -8  22 -124.29  240.76
 -11  -8 -22  252.89  140.02
  11   8 -22  106.97  224.66
 -11  -8 -21   52.29  146.64
  11  -8  21  -31.83  269.48
  11   8 -21   36.64  139.14
  11   8 -20  -79.70  146.23
  11  -8  20 -301.63  147.75
 -11  -8 -20   43.01  143.96
  11   8 -20   70.94  146.19
  11   8 -19 -116.01  149.45
 -11  -8 -19  -95.14  147.43
  11  -8  19  235.85  150.66
  11   8 -18   48.86  121.30
 -11  -8 -18   -3.14  118.92
  11  -8  18    2.48  121.06
  11   8 -18 -118.51  120.34
 -11  -8 -18  -42.58  119.86
  11  -8  17  474.54  230.94
 -11  -8 -17  -44.25  162.07
  11   8 -17   21.30  125.74
  11   8 -16   64.38  124.49
  11   8 -16   35.09  166.42
 -11  -8 -16  174.44  156.71
  11  -8  16   12.43  228.91
 -11  -8 -16  -10.19  157.58
  11  -8  15  486.11  243.49
  11   8 -15  392.95  210.77
 -11  -8 -15  388.49  148.86
  11   8 -15  375.93  131.48
 -11  -8 -15  430.22  194.59
  11   8 -14  645.58  129.61
  11  -8  14  719.83  235.22
  11   8 -14  691.58  206.82
 -11  -8 -14  632.08  146.00
 -11  -8 -14  726.20  202.69
  11   8 -13  684.40  179.35
 -11  -8 -13  635.39  144.91
  11   8 -13  434.29  131.78
  11  -8  13  579.28  237.09
 -11  -8 -13  753.20  191.98
  11   8 -12  869.01  136.99
 -11  -8 -12 1005.56  174.79
  11   8 -12 1042.71  194.44
 -11  -8 -12  804.15  156.49
 -11  -8 -11  349.37  170.55
 -11  -8 -11  316.31  124.13
 -11  -8  -9   15.76  156.79
 -11  -8  -3   49.61   83.30
 -11  -8  -3   88.74  172.67
 -11  -8  -2  344.94   93.70
  11   8  -2  229.78   84.35
  11   8  -2  129.35  117.04
 -11  -8  -2  403.94  212.46
  11   8  -1  542.17  137.10
 -11  -8  -1  901.79  251.99
 -11  -8  -1  369.31   88.26
 -11   8   0  994.91  127.17
 -11  -8   0  506.65   94.70
 -11  -8   0  949.40  257.06
 -11   8   0 1035.03  160.77
 -11  -7 -23   66.47  157.33
 -11  -7 -23  165.17  180.31
  11  -7  23 -106.49  154.41
 -11  -7 -22   41.15  186.98
  11  -7  22  134.96  217.88
  11   7 -22  -20.81  222.50
 -11   7  21  205.89  263.48
 -11  -7 -21  234.63  138.53
  11  -7  21 -212.85  218.68
  11   7 -21  185.99  225.73
  11   7 -21  192.28  136.63
 -11  -7 -21   58.79  185.88
  11   7 -20   81.49  203.93
  11  -7  20  113.50  238.37
  11   7 -20  -21.76  135.63
 -11  -7 -20  223.65  147.99
  11  -7  19  -33.86  155.94
  11   7 -19 -131.75  154.79
 -11  -7 -19   15.91  152.35
  11   7 -19 -127.91  154.90
  11  -7  18   13.69  218.72
  11   7 -18    2.42  129.94
 -11  -7 -18  147.92  144.71
 -11   7  18   72.22  276.88
  11   7 -18  -32.09  215.22
 -11  -7 -17  184.28  145.21
  11   7 -17  186.78  179.05
  11  -7  17   75.88  216.44
  11   7 -17   83.99  130.25
 -11  -7 -16  144.01  141.11
  11  -7  16  217.74  222.52
  11   7 -16   79.37  185.42
  11   7 -16   14.43  115.02
 -11  -7 -15   10.08  148.45
  11   7 -15   13.58  119.02
  11  -7  15  -20.23  205.27
 -11  -7 -15   37.17  160.55
 -11  -7 -14  362.91  134.49
  11  -7  14  269.04  210.28
  11   7 -14  283.67  116.40
 -11  -7 -14  295.47  163.77
  11   7 -14   91.30  178.48
  11   7 -13  107.01  174.72
  11   7 -13   48.17  113.17
  11  -7  13   49.41  202.79
 -11  -7 -13  230.66  175.36
 -11  -7 -13  293.42  134.63
 -11  -7 -12  418.89  126.14
  11   7 -12  313.10  182.60
  11   7 -12  317.07  115.64
 -11  -7 -12  481.53  171.40
 -11  -7 -11  217.83  154.63
 -11  -7 -11   21.89  110.19
 -11  -7  -4  239.30  174.40
  11   7  -3  168.30  120.09
 -11  -7  -3   88.45   73.65
 -11  -7  -3  360.77  221.94
 -11  -7  -3   27.24   79.13
 -11  -7  -2   58.80   73.31
 -11  -7  -2  332.11  190.27
  11   7  -2  161.90  122.95
 -11  -7  -2  100.32   79.31
 -11  -7  -1  257.96   74.01
 -11  -7  -1  224.94  213.70
 -11  -7  -1  238.23   74.75
  11   7  -1  296.74  118.25
 -11   7   0  256.07  131.48
 -11  -7   0  306.63  226.76
 -11   7   0  264.44  111.63
 -11  -6 -24   71.03  167.13
  11  -6  24  -88.94  175.88
 -11  -6 -24 -130.71  166.02
 -11  -6 -23   21.13  178.70
  11   6 -23 -216.17  184.71
  11   6 -22  -13.15  199.46
  11  -6  22  151.59  202.15
  11   6 -22 -159.14  195.52
 -11  -6 -22  -34.17  194.03
 -11  -6 -21   12.76  158.11
  11   6 -21   97.22  219.76
  11  -6  21  261.39  236.55
 -11  -6 -21  -78.89  172.42
  11   6 -20  100.72  210.56
  11  -6  20  -54.76  233.19
  11   6 -20  -11.65  123.46
  11   6 -19 -123.13  188.39
  11   6 -19   22.41  187.75
 -11   6  19  -54.32  184.55
  11  -6  19   -1.39  189.59
  11   6 -18 -159.46  140.26
  11   6 -18 -166.90  140.08
 -11  -6 -18 -131.41  137.97
  11  -6  18 -179.00  140.71
  11  -6  17 -222.29  126.79
  11   6 -17   30.69  127.06
 -11  -6 -17    7.44  124.66
  11   6 -17   39.62  126.41
 -11   6  17 -169.69  124.41
 -11  -6 -17  148.73  126.07
  11  -6  16  -37.12  143.96
  11   6 -16  -89.48  143.67
  11   6 -16  -22.06  144.83
 -11  -6 -16   88.23  141.79
  11   6 -15  325.88  138.78
 -11   6  15  404.02  268.23
  11   6 -15  274.45  176.21
  11  -6  15  286.73  233.77
 -11  -6 -15  420.32  164.59
 -11  -6 -15  199.77  139.64
 -11  -6 -14   62.02  133.64
  11   6 -14   34.80  109.84
  11   6 -14  -58.01  163.85
  11  -6  14   30.58  200.64
 -11  -6 -14  169.76  161.49
 -11  -6 -13  800.16  186.85
  11   6 -13  717.81  173.77
 -11  -6 -13  770.56  138.47
  11   6 -13  733.92  127.22
 -11  -6 -12 -138.32  161.51
 -11  -6 -12  -70.98  127.45
  11   6 -12  169.84  118.11
  11   6 -12   54.28  169.35
 -11  -6 -11  375.07  117.69
 -11  -6 -11  184.67  158.01
  11   6 -11  340.40  156.28
 -11  -6  -4  386.37   81.45
 -11  -6  -4  705.88  200.31
 -11  -6  -3   56.56  183.56
 -11  -6  -3   13.85   72.82
 -11  -6  -3   36.43   68.87
 -11  -6  -2  -50.76   68.20
 -11  -6  -2  -39.65  185.10
 -11  -6  -2   52.09   68.49
  11   6  -2   60.81  111.54
 -11  -6  -1   72.52  215.71
  11   6  -1   42.62  117.95
 -11  -6  -1  130.68   65.38
 -11  -6  -1  103.55   65.32
 -11   6   0  494.66  121.77
 -11  -6   0  509.92  219.12
 -11   6   0  549.98  131.80
 -11  -5 -24   81.04  178.88
  11   5 -24  116.82  186.86
  11   5 -24 -158.02  180.23
 -11  -5 -23  198.80  206.21
  11  -5  22   38.93  191.23
 -11  -5 -22  111.43  155.86
 -11  -5 -22   33.16  179.88
  11   5 -22  -11.67  220.11
  11   5 -22  317.92  145.99
 -11  -5 -21  159.40  181.87
  11   5 -21   82.22  135.23
  11   5 -21  263.91  224.10
  11  -5  21  790.48  216.59
  11  -5  20  141.91  232.61
 -11  -5 -20  149.05  155.84
  11   5 -20  -40.98  203.64
 -11   5  20  523.99  290.40
  11   5 -19  541.85  205.49
  11  -5  19  106.71  210.94
 -11  -5 -18 -137.76  131.72
  11   5 -18  219.23  132.59
  11  -5  18 -156.19  133.01
  11   5 -18   44.14  132.20
 -11  -5 -18  -17.26  130.72
 -11  -5 -17  508.13  153.10
 -11   5  17  863.34  285.79
  11  -5  17  193.37  181.89
  11   5 -17  456.20  209.16
  11   5 -17  534.56  131.99
 -11  -5 -17  202.12  117.22
  11   5 -16  394.54  212.10
  11   5 -16  455.96  131.66
 -11  -5 -16  508.37  139.95
  11  -5  16  391.21  190.05
 -11  -5 -16  322.28  144.85
 -11   5  15  243.68  246.13
  11   5 -15  346.93  182.66
 -11  -5 -15  387.14  135.41
  11   5 -15  192.32  123.96
 -11  -5 -15  267.12  126.55
  11  -5  15  214.74  198.93
  11  -5  14  214.77  192.49
  11   5 -14  156.87  168.91
  11   5 -14  205.79  124.70
 -11  -5 -14  169.42  151.17
 -11  -5 -14  105.65  117.28
  11  -5  13 -217.62  144.38
 -11  -5 -13   12.05  144.55
  11   5 -13   48.08  144.22
  11   5 -13   10.12  145.47
 -11  -5 -13   61.72  142.63
  11  -5  12  310.83  158.20
 -11  -5 -12  354.33  108.16
  11   5 -12  265.52  113.94
  11   5 -12  167.62  171.17
 -11  -5 -12  195.06  145.83
 -11  -5 -11  227.07  147.59
  11   5 -11  323.40  148.71
 -11  -5 -11  248.70  104.87
 -11  -5  -5  504.46  146.74
 -11  -5  -4  931.99  199.60
 -11  -5  -4  332.58   70.37
 -11  -5  -4  549.75  156.91
 -11  -5  -3  365.31  164.57
 -11  -5  -3 1006.04  222.81
 -11  -5  -3  334.20   65.24
 -11  -5  -2  892.98  176.26
 -11  -5  -2 1114.50  233.79
 -11  -5  -1  270.90   59.49
 -11  -5  -1  326.90  211.57
 -11  -5   0   25.42   57.11
 -11   5   0  -30.74  111.58
 -11  -5   0   55.70   56.62
 -11   5   0    1.90  118.29
 -11  -5   0  123.15  214.43
  11   4 -24   10.96  234.67
 -11  -4 -24  135.23  186.54
  11   4 -23   61.19  208.01
 -11  -4 -23   98.22  183.41
  11   4 -22  112.97  244.47
  11   4 -22   -5.60  137.82
 -11  -4 -22  250.56  203.00
  11   4 -21 -145.97  179.84
  11  -4  21  -82.85  185.45
  11   4 -21  139.74  184.24
 -11  -4 -21  -28.21  180.20
 -11  -4 -21  157.59  178.63
  11   4 -20  -48.64  217.12
  11   4 -20  -17.83  128.84
  11  -4  20  121.99  212.94
 -11  -4 -19  271.96  151.59
  11   4 -19  -38.07  132.88
  11  -4  19  277.05  199.97
  11   4 -18  -98.60  147.47
  11   4 -18  -45.91  148.59
  11  -4  18 -149.98  148.80
 -11  -4 -18   16.26  146.95
  11  -4  17  399.90  182.10
 -11   4  17  136.14  277.38
 -11  -4 -17  285.18  142.25
 -11  -4 -17  253.57  130.13
  11   4 -17  356.12  116.11
  11   4 -17  -43.38  196.04
 -11  -4 -16  432.98  142.20
  11  -4  16  110.11  191.10
  11   4 -16  365.68  203.12
  11  -4  15  233.84  183.43
  11   4 -15  214.86  120.30
 -11   4  15  795.86  256.49
 -11  -4 -15  342.04  115.35
  11   4 -15  189.30  189.14
 -11  -4 -14  329.20  140.92
  11   4 -14  500.04  132.29
  11  -4  14  410.30  178.74
  11   4 -14  506.45  179.40
 -11  -4 -13  344.29  135.21
  11  -4  13  451.74  192.75
  11   4 -13  567.66  132.33
  11   4 -13  651.76  187.29
 -11  -4 -13  439.16  115.39
  11   4 -12  336.73  168.04
  11   4 -12  263.47  112.35
 -11  -4 -12  200.75  111.31
 -11  -4 -12  327.19  146.58
 -11  -4 -11  297.61  157.34
 -11  -4 -11  391.29  105.22
  11   4 -11  332.79  167.85
 -11  -4  -5 1015.47  227.56
 -11  -4  -5 1194.64  183.02
 -11  -4  -4  148.55  158.17
 -11  -4  -4  205.09  187.90
 -11  -4  -3    4.58  164.96
 -11  -4  -3  117.00  178.03
 -11  -4  -2  109.90  216.70
 -11  -4   0  278.39  213.18
 -11   4   0   96.37  131.26
 -11  -4   0  271.92  169.28
  11   3 -24  -26.73  148.86
  11   3 -24  214.27  224.89
 -11  -3 -24   17.54  139.62
  11   3 -23  180.81  182.69
 -11  -3 -23  -68.24  174.18
  11   3 -23 -266.28  175.49
  11   3 -22    7.44  138.27
 -11  -3 -22  277.12  182.83
  11   3 -21   18.22  235.04
 -11  -3 -21  200.84  158.97
  11  -3  21   -0.97  203.43
  11   3 -21   37.00  133.03
 -11  -3 -21   83.22  153.18
  11   3 -20  458.87  208.85
  11  -3  20 -120.85  205.22
  11   3 -20   36.70  132.82
 -11  -3 -20  286.47  189.80
  11   3 -19   73.85  195.41
  11   3 -19  103.37  125.05
  11  -3  19  -58.22  191.39
  11  -3  18  296.04  177.71
  11   3 -18  140.25  211.20
 -11   3  18 -127.06  236.79
 -11  -3 -18   85.89  160.64
  11   3 -18  168.08  129.37
 -11  -3 -17 -122.51  121.53
 -11  -3 -17    4.64  121.79
 -11   3  17 -119.54  119.54
  11   3 -17  152.60  122.20
  11  -3  17   21.06  122.06
  11   3 -16  511.54  197.67
 -11  -3 -16  504.26  128.95
  11   3 -16  519.16  137.54
 -11   3  16  980.58  273.79
  11  -3  16  237.25  179.57
  11  -3  15 -124.46  115.56
 -11  -3 -15  -42.29  115.29
 -11   3  15  311.28  113.51
 -11  -3 -15   99.43  115.93
  11   3 -15 -251.13  115.65
  11  -3  14  610.95  184.97
 -11  -3 -14  528.42  150.08
 -11   3  14 1095.02  274.16
 -11  -3 -14  851.94  134.78
  11   3 -14  662.02  201.13
  11   3 -14  742.24  129.58
  11   3 -13   23.60  112.29
 -11  -3 -13  151.13  116.51
 -11   3  13  166.54  221.99
 -11  -3 -13  191.29  119.81
  11   3 -13   27.32  170.02
  11   3 -12  944.03  207.62
 -11   3  12  500.14  270.55
 -11  -3 -12  572.96  115.06
  11   3 -12  655.90  128.72
 -11  -3 -12  840.97  167.24
 -11  -3  -5  331.21  170.61
 -11  -3  -5  440.18  195.27
 -11  -3  -4  713.67  185.34
 -11  -3  -4  498.51  202.59
 -11  -3  -3  122.45  153.75
 -11  -3  -3   45.43  175.08
 -11  -3  -2  557.19  172.61
 -11  -3  -1   22.12  155.64
 -11  -3  -1 -283.54  154.05
 -11   3   0  136.51  124.30
 -11   3   0  -66.96  201.28
 -11  -3   0  -21.80  223.05
 -11  -3   0 -227.64  163.01
  11   2 -24   58.16  134.43
  11   2 -24   16.35  228.12
 -11  -2 -24  101.19  142.94
 -11  -2 -23   46.82  140.18
 -11  -2 -23  269.81  188.04
  11   2 -22   23.58  224.92
  11   2 -22  216.57  150.82
  11  -2  21  260.39  230.81
 -11  -2 -21  131.91  146.79
  11   2 -21  314.75  210.70
  11  -2  20  438.28  208.10
  11   2 -20  -31.03  200.69
  11   2 -19   55.55  215.09
  11  -2  19  220.03  183.76
 -11  -2 -19  182.13  164.03
  11   2 -19  175.69  136.77
  11  -2  18  386.73  175.14
  11   2 -18  339.95  140.72
  11   2 -18  497.01  209.93
  11   2 -17  466.61  240.59
  11   2 -17  186.26  126.48
  11  -2  17  137.82  179.14
 -11  -2 -17  463.50  152.83
 -11   2  17  434.63  263.18
  11   2 -16  526.24  191.60
 -11   2  16  567.85  271.05
  11   2 -16  128.51  129.52
 -11  -2 -16  425.61  148.57
 -11  -2 -16  639.99  169.08
  11  -2  16  550.96  178.07
 -11  -2 -16  428.00  114.26
  11   2 -15  216.19  194.06
 -11  -2 -15  443.74  112.94
 -11  -2 -15  327.59  133.94
  11   2 -15  433.74  132.53
 -11   2  15  716.07  256.46
  11  -2  15  -19.26  177.27
  11   2 -14  246.98  178.02
  11  -2  14  126.34  165.14
  11   2 -14  168.56  115.00
 -11   2  14  643.80  283.33
 -11  -2 -14  234.37  118.56
 -11  -2 -13  449.53  129.14
  11   2 -13  535.84  182.72
 -11  -2 -13  399.62  117.26
  11   2 -13  552.68  120.25
  11   2 -12    6.60  113.38
 -11  -2 -12    9.08  103.26
  11   2 -12  192.56  159.10
 -11  -2 -12  -82.99  128.31
 -11  -2  -5  240.04  174.74
  11   2  -4  652.79  141.97
 -11  -2  -4  703.23  190.29
 -11  -2  -4  523.94  177.40
 -11  -2  -3  145.09  171.61
  11   2  -3  164.94  113.83
 -11  -2  -3  314.14  186.89
 -11   2   2  711.65  121.72
 -11   2   2  709.14  210.54
 -11  -2  -2 1007.42  192.24
  11   2  -2  681.95  125.99
 -11  -2  -2  692.81  208.31
 -11  -2  -1  386.37  180.71
 -11   2   1  170.52  199.63
  11   2  -1  140.86  112.65
  11   2  -1   47.64  135.68
 -11  -2  -1  481.65  212.49
 -11   2   1   37.07  121.34
 -11  -2   0  399.45  189.93
 -11   2   0  358.87  128.02
 -11   2   0  445.59  208.76
 -11   2   0  155.37  206.22
 -11  -2   0  115.13  221.87
 -11  -1 -24  218.27  136.78
  11   1 -24 -126.49  217.23
  11   1 -23  215.41  151.03
  11   1 -22 -106.34  195.00
 -11  -1 -22  193.93  159.38
  11   1 -21  295.86  194.09
  11  -1  21  -66.64  192.80
  11   1 -20  -58.76  191.85
 -11   1  20  106.07  269.73
  11  -1  20  274.02  192.62
 -11   1  19  -55.20  154.17
 -11  -1 -19   98.15  158.29
  11   1 -19   23.58  154.72
 -11  -1 -19  -26.14  153.75
  11  -1  19 -163.97  158.05
 -11  -1 -18  -40.02  162.10
  11   1 -18   30.80  163.09
  11   1 -18   68.14  166.63
  11  -1  18 -103.10  165.71
 -11   1  18  -83.28  162.12
  11   1 -17  -41.32  138.56
 -11   1  17    5.64  135.14
  11   1 -17   27.77  136.31
 -11  -1 -17  -25.75  139.59
  11  -1  17  -59.81  137.86
  11  -1  16   91.55  171.47
 -11   1  16  427.71  254.39
 -11  -1 -16  254.81  149.10
  11   1 -16  429.27  175.75
  11   1 -16  349.74  130.71
  11   1 -15  300.41  119.10
  11  -1  15  -34.59  156.13
 -11  -1 -15  319.01  107.80
  11   1 -15  254.85  157.41
 -11   1  14 1061.98  256.39
 -11  -1 -14  690.99  125.11
 -11  -1 -14  577.21  118.72
  11   1 -14  779.27  139.33
  11  -1  14  741.35  180.04
  11   1 -14  676.92  167.69
 -11  -1 -13  312.20  104.84
 -11  -1 -13  495.62  113.28
  11   1 -13  521.19  158.24
 -11  -1 -12  877.26  113.66
 -11  -1 -12  782.64  150.01
  11   1 -12  938.55  193.35
 -11  -1  -7  149.91  170.95
 -11  -1  -4  272.57  175.29
  11   1  -4  396.60  154.14
 -11  -1  -4  344.06  171.36
 -11  -1  -3  289.66  200.79
  11  -1   3  259.11  130.54
 -11  -1  -3   92.13  185.25
  11   1  -3  456.14  142.13
 -11   1   3  311.99  115.85
 -11   1   3  463.30  208.21
  11  -1   2 1428.69  179.75
 -11  -1  -2 2014.48  263.06
 -11   1   2 1719.76  236.58
  11   1  -2 1353.69  152.35
 -11  -1  -2 1515.56  202.36
 -11   1   2 1549.46  156.27
  11   1  -2 1627.86  183.97
 -11   1   1  559.24  260.72
 -11  -1  -1  575.65  212.32
  11   1  -1  191.64  109.71
  11   1  -1  447.76  139.78
  11  -1   1  473.55  130.59
  11  -1   1  279.30  126.71
 -11   1   1  528.11  193.06
 -11  -1  -1  458.55  182.42
 -11  -1   0 2278.84  287.51
 -11   1   0 2311.09  280.60
 -11  -1   0 2158.82  243.90
 -11   1   0 2419.43  272.01
 -11   0 -24   41.70  135.19
  11   0 -24  193.12  189.02
 -11   0 -23   -7.17  151.53
  11   0 -23  -87.83  148.54
  11   0 -22  260.09  203.70
  11   0 -22   -6.56  143.76
  11   0 -22  334.17  256.71
  11   0 -21  -39.50  178.72
  11   0 -21 -105.31  186.14
  11   0 -19  317.27  196.19
  11   0 -19   75.72  131.86
  11   0 -18  -80.63  165.65
 -11   0 -18 -160.40  160.53
  11   0 -18  -63.42  161.52
 -11   0 -18  -25.93  166.41
  11   0 -17  241.54  127.60
 -11   0 -17  373.58  139.49
  11   0 -17  242.18  163.59
  11   0 -16 -162.18  170.25
  11   0 -16 -138.34  172.96
 -11   0 -16  162.55  169.25
 -11   0 -16  -70.74  175.43
 -11   0 -15  517.17  156.18
 -11   0 -15  319.16  118.26
  11   0 -15  455.11  133.65
 -11   0 -15  347.60  106.60
  11   0 -15  371.23  162.52
 -11   0 -14  -52.43  160.67
  11   0 -14  -51.09  161.60
  11   0 -14  -66.75  160.45
 -11   0 -14  -71.13  164.75
  11   0 -13   54.98  115.70
  11   0 -13  154.88  152.57
 -11   0 -13   73.12  106.62
 -11   0 -13  -37.88  105.11
 -11   0 -12  369.41  120.36
 -11   0 -12  434.14  105.60
  11   0 -12  422.89  119.91
  11   0 -12  603.33  151.53
 -11   0 -11  288.64  121.16
 -11   0 -11   40.98  116.19
  11   0 -11  238.75  140.95
  11   0 -11   48.03   94.77
  11   0 -10  556.97  153.96
 -11   0 -10  514.69   82.55
 -11   0 -10  860.17  154.75
  11   0 -10  536.73  199.51
  11   0 -10  565.60   91.50
  11   0  -9  288.34  167.97
  11   0  -9  200.65  143.81
  11   0  -9  223.71   81.53
 -11   0  -9  316.48  154.93
  11   0  -8  912.30   85.03
  11   0  -8 1215.04  211.05
 -11   0  -8 1182.95  175.45
  11   0  -8 1024.48  162.30
 -11   0  -7 1082.19  190.31
  11   0  -7  795.76   69.40
  11   0  -7 1246.70  204.94
  11   0  -7  790.78  142.01
 -11   0  -6 1326.26  195.51
  11   0  -6  982.30  183.04
  11   0  -6 1017.23   64.64
  11   0  -6  993.26  157.17
  11   0  -5  588.86  143.82
 -11   0  -5  426.98  189.47
  11   0  -4  331.31  135.25
 -11   0  -4   77.07  165.44
 -11   0  -3 -128.40  185.33
 -11   0  -3  106.28  184.07
  11   0  -3   47.11  127.03
 -11   0  -2   74.37  189.92
 -11   0  -2  159.00  192.73
  11   0  -2  -96.48  129.41
 -11   0  -1 -271.02  183.38
 -11   0  -1  178.65  178.97
  11   0  -1  -12.72  119.09
 -11   0   0  272.67  205.32
 -11   0   0 -145.72  181.19
 -10 -26  -1  258.77  276.41
  10  26  -1  268.50  179.92
  10  26  -1  227.02  161.70
  10 -26   1   -7.22  227.01
 -10  26   1   31.91  167.55
 -10 -26   0   68.89  251.11
  10  25  -7   15.45  154.49
  10  25  -7  328.03  188.23
  10 -25   7  296.53  227.53
  10  25  -7  139.61  186.21
 -10 -25  -7  467.95  263.04
  10  25  -6  596.38  183.91
  10  25  -6  314.88  182.03
  10 -25   6  231.20  230.80
  10 -25   6   25.38  189.77
 -10 -25  -6  219.37  249.55
  10 -25   5  201.36  225.44
  10 -25   5  181.99  190.34
 -10  25   5    1.63  193.18
  10  25  -5  259.18  173.40
  10  25  -5   99.17  169.79
  10  25  -5  305.32  168.42
 -10 -25  -5  182.20  251.77
  10 -25   4  267.94  197.64
 -10 -25  -4   46.65  274.51
  10  25  -4  184.05  166.28
  10 -25   4  264.46  227.57
 -10  25   4  627.36  189.50
  10  25  -4  339.91  195.37
  10  25  -3  118.26  165.64
  10 -25   3  217.42  203.52
  10  25  -3  336.75  192.07
 -10 -25  -3  674.59  297.92
 -10  25   3  440.36  185.01
  10  25  -2  110.46  167.76
  10 -25   2   60.89  198.48
 -10 -25  -2  148.69  268.81
 -10  25   2   90.02  195.35
  10  25  -2   -3.08  171.20
  10  25  -1  -44.45  274.96
  10  25  -1  105.89  257.03
  10 -25   1 -209.10  266.02
 -10 -25  -1  -93.18  255.60
 -10 -25   0  391.40  258.58
 -10  25   0 -130.41  155.17
  10  24 -10   89.39  217.62
  10  24 -10  219.40  188.31
 -10 -24 -10  -76.77  229.31
  10  24  -9   42.58  178.69
 -10 -24  -9   53.32  226.77
  10 -24   9  338.26  257.63
  10  24  -9   13.28  206.48
  10  24  -9  134.84  148.24
  10 -24   8  442.66  247.70
  10  24  -8   82.33  205.86
  10  24  -8   27.78  141.45
  10  24  -8   36.18  186.67
 -10 -24  -8   22.77  260.96
 -10 -24  -7  486.21  304.57
  10  24  -7  109.06  147.35
  10 -24   7  391.88  206.76
  10  24  -7  157.01  161.77
  10 -24   7  128.24  170.76
  10  24  -7  332.07  208.35
  10  24  -6   30.33  195.14
  10  24  -6  -70.12  153.33
  10 -24   6  129.92  229.04
 -10 -24  -6  206.84  237.82
  10 -24   6  -63.90  161.17
  10  24  -6  -25.48  191.14
 -10 -24  -5  231.17  229.68
  10  24  -5 -218.10  163.25
  10  24  -5    8.23  167.21
  10  24  -5  142.57  197.91
  10 -24   5  143.96  220.19
  10 -24   4   45.94  281.08
 -10 -24  -4 -444.38  275.05
 -10  24   4  215.97  273.33
  10  24  -4 -223.49  297.30
  10  24  -4 -160.23  275.38
  10 -24   4  218.31  276.05
  10  24  -4    9.49  275.18
 -10  24   3  209.91  192.83
  10  24  -3   84.77  173.67
 -10 -24  -3  384.74  281.44
  10  24  -3  122.65  153.72
  10 -24   3  155.75  205.22
  10  24  -2   28.78  258.94
  10 -24   2   65.82  265.86
  10 -24   2   60.67  259.66
 -10 -24  -2 -190.67  257.72
  10  24  -2   72.05  277.92
 -10  24   2  -34.94  257.03
  10  24  -1   93.70  148.30
 -10 -24  -1   62.85  263.39
  10 -24   1  144.10  203.48
  10  24  -1   56.37  174.78
 -10  24   1   55.33  172.62
 -10 -24   0 -145.23  169.20
  10 -23  12   44.23  208.84
  10  23 -12   11.94  210.64
  10  23 -12 -437.53  209.34
 -10 -23 -11  294.62  215.58
  10  23 -11  308.73  191.29
  10 -23  11  196.61  290.06
  10  23 -11   72.78  223.19
  10  23 -10  -19.97  215.84
  10  23 -10 -121.62  168.24
 -10 -23 -10  519.76  245.09
  10 -23   9  263.76  233.15
  10  23  -9   34.03  134.49
 -10 -23  -9  282.20  222.71
  10  23  -9  -35.22  217.84
  10  23  -9  210.97  168.05
 -10 -23  -8   84.47  160.62
  10 -23   8  371.06  215.33
  10  23  -8  262.31  169.92
 -10 -23  -8   48.02  245.03
  10  23  -8  -51.10  144.48
  10  23  -8  332.40  204.03
  10 -23   7  351.53  236.03
 -10 -23  -7  289.36  265.54
  10  23  -7  183.51  158.05
  10  23  -7   79.02  190.78
  10  23  -7  145.37  159.05
  10  23  -6  146.10  157.97
  10 -23   6  245.51  198.69
 -10 -23  -6  359.63  250.37
  10  23  -6  341.10  162.02
  10 -23   6   33.73  230.54
  10  23  -6  246.63  198.78
  10 -23   5  -76.71  237.12
  10  23  -5  255.55  184.07
  10  23  -5  196.29  156.55
  10  23  -5   56.35  158.35
  10 -23   5  152.28  177.20
 -10 -23  -5  715.65  269.11
  10  23  -4   78.66  154.20
 -10  23   4  126.10  163.58
  10  23  -4  226.11  166.69
  10 -23   4  -50.81  195.01
 -10 -23  -4  281.60  236.21
  10  23  -3  170.32  196.45
 -10  23   3  -74.06  186.49
  10 -23   3  -10.24  204.11
 -10 -23  -3 -138.54  260.72
  10 -23   3  311.10  210.66
  10  23  -3  -63.06  162.34
  10  23  -2  282.96  164.88
 -10  23   2  208.75  190.23
  10 -23   2   63.89  209.08
 -10 -23  -2  295.12  263.78
  10  23  -1  217.78  178.56
 -10 -23  -1  123.22  230.56
 -10  23   1   55.38  181.19
  10 -23   1  314.41  198.02
 -10 -23   0  410.25  257.35
 -10  23   0  402.15  173.41
  10  22 -14   18.77  219.47
  10  22 -14   84.99  220.30
 -10 -22 -14  -92.08  222.11
  10 -22  14 -325.77  217.73
  10  22 -13  -15.86  193.52
 -10 -22 -13   79.63  193.10
  10 -22  13  -15.94  278.75
  10  22 -12  200.89  173.76
  10  22 -12   71.76  185.59
 -10 -22 -12 -117.62  186.56
  10 -22  12  208.68  264.07
  10  22 -11  200.70  175.39
  10  22 -11  123.01  195.65
 -10 -22 -11   31.07  205.86
  10  22 -10   74.00  215.95
  10 -22  10  -69.52  242.54
  10  22 -10  157.10  177.38
 -10 -22 -10  -44.07  220.47
  10  22 -10  -58.59  130.47
  10  22  -9  433.78  203.93
  10  22  -9  192.09  141.52
  10  22  -9  201.63  158.63
 -10 -22  -9  233.97  227.68
  10 -22   9  461.22  261.12
  10  22  -8   32.96  151.86
  10  22  -8  -40.82  148.08
  10 -22   8  195.49  266.82
  10  22  -8  304.62  214.80
 -10 -22  -8 -325.68  226.37
  10  22  -7   31.92  146.05
  10  22  -7   83.78  148.49
 -10 -22  -7 -148.36  261.60
  10  22  -7  217.74  208.66
  10 -22   7  -17.07  223.99
  10  22  -6  246.78  144.34
  10  22  -6  257.06  173.88
  10 -22   6   23.94  217.16
 -10 -22  -6  -29.26  237.02
  10  22  -6  115.97  139.45
 -10 -22  -5  117.98  252.36
  10  22  -5  111.30  177.55
  10  22  -5  -41.79  132.59
  10 -22   5  -12.06  186.57
  10  22  -4  198.54  202.90
  10 -22   4  190.07  201.68
 -10 -22  -4  313.93  249.60
  10  22  -4  241.23  160.27
  10  22  -3  -38.50  168.14
 -10 -22  -3  132.88  270.35
 -10  22   3  542.45  178.75
  10  22  -3  452.24  173.66
 -10  22   2  521.24  199.74
 -10 -22  -2  534.66  264.95
  10  22  -2  308.61  169.17
  10 -22   1  328.73  217.62
 -10 -22  -1  183.33  226.32
 -10  22   1  356.45  187.02
  10  22  -1  121.53  162.80
 -10 -22   0  165.41  237.73
  10  21 -15 -132.51  214.82
 -10 -21 -15  -68.84  216.46
  10 -21  15  392.98  212.49
  10  21 -15  -35.92  215.13
 -10 -21 -14  132.66  200.01
  10 -21  14  244.20  288.11
  10  21 -14  132.62  174.64
  10  21 -14  -89.16  202.77
 -10 -21 -13 -170.40  197.16
  10  21 -13  193.97  177.15
  10  21 -13   48.83  189.05
  10 -21  13   29.34  277.86
  10  21 -12 -175.92  197.25
  10  21 -12  -38.94  198.46
  10 -21  12 -216.75  196.79
 -10 -21 -12  274.71  200.56
  10 -21  11   37.89  212.34
 -10 -21 -11  -92.74  216.07
  10  21 -11  200.94  213.84
  10  21 -11 -301.54  212.31
 -10 -21 -10 -111.87  207.26
  10  21 -10   -2.13  203.72
  10  21 -10  -86.86  218.92
  10 -21  10   48.85  204.14
  10  21 -10 -213.69  205.31
  10 -21   9   78.31  165.85
  10  21  -9  139.67  185.95
  10  21  -9   30.22  168.82
  10 -21   9  -27.86  285.55
 -10 -21  -9  300.61  219.25
  10  21  -9   69.35  144.76
  10  21  -8   46.20  153.59
  10  21  -8  121.62  181.44
  10 -21   8 -126.60  236.82
 -10 -21  -8  -53.27  184.96
  10  21  -8  105.21  156.09
  10  21  -7   -5.91  143.74
  10  21  -7  134.81  132.86
  10  21  -7   78.59  192.72
  10 -21   7  -32.13  238.88
 -10 -21  -7   93.89  240.12
  10  21  -6 -109.76  154.95
  10 -21   6   51.80  208.25
  10  21  -6  121.74  126.26
 -10 -21  -6   84.18  260.94
  10  21  -6  158.15  190.97
  10  21  -5  -30.83  138.06
  10  21  -5   29.25  168.37
  10 -21   5   51.68  170.38
  10  21  -5  104.12  155.65
  10 -21   5 -127.62  222.87
 -10 -21  -5   27.94  262.09
  10  21  -4 -168.95  257.07
  10 -21   4 -111.83  242.45
  10  21  -4   91.67  241.44
 -10 -21  -4 -141.88  240.12
  10  21  -3 -137.65  285.03
  10 -21   3 -203.53  269.76
 -10 -21  -3  180.92  266.05
  10 -21   2   69.78  202.35
  10  21  -2  126.23  161.20
 -10 -21  -2  194.30  247.90
 -10  21   2  283.73  167.84
  10  21  -1   15.99  148.86
 -10  21   1   54.85  154.56
 -10 -21  -1  161.47  196.65
 -10 -21   0   59.92  221.92
  10  20 -17  103.64  169.73
  10 -20  17  220.11  285.43
  10  20 -17  188.24  216.58
 -10 -20 -17   -3.58  183.62
 -10 -20 -17  201.39  199.85
 -10 -20 -16  123.30  220.13
  10 -20  16  287.12  320.00
  10  20 -16   13.79  184.05
  10  20 -16  101.32  211.32
  10  20 -15   15.77  151.89
  10  20 -15  -79.56  217.89
 -10 -20 -15  349.34  211.97
  10 -20  15  -28.03  293.28
 -10 -20 -14   12.36  201.42
  10 -20  14 -450.35  197.61
  10  20 -14  106.82  199.72
  10  20 -14   63.08  199.27
 -10 -20 -13  441.01  202.87
  10  20 -13  219.97  213.77
  10  20 -13  -33.52  147.81
  10 -20  13  227.04  297.94
  10  20 -12  -36.00  193.32
 -10 -20 -12  -27.32  196.52
  10 -20  12    0.92  192.85
  10  20 -12  -91.44  194.45
 -10 -20 -11  191.08  211.19
  10  20 -11  189.39  155.77
  10 -20  11  142.35  277.92
  10  20 -11  239.95  196.41
  10  20 -10  589.72  195.66
  10  20 -10  330.07  140.96
  10  20 -10  216.14  126.62
  10 -20  10   96.00  269.67
 -10 -20 -10  593.14  229.08
  10  20  -9 -202.28  223.67
  10 -20   9  265.39  210.43
 -10 -20  -9   58.62  213.06
  10  20  -9 -106.36  209.71
  10  20  -9  -43.75  211.47
  10  20  -8   70.07  136.36
  10  20  -8 -131.53  187.54
 -10 -20  -8  163.59  199.23
  10 -20   8  353.59  161.80
  10  20  -8   63.71  136.55
  10 -20   8  271.24  258.21
 -10 -20  -7    8.56  226.42
  10 -20   7  -10.81  225.12
  10  20  -7  -70.17  225.92
  10  20  -7   33.59  239.32
  10 -20   6  311.40  191.03
 -10 -20  -6  470.74  236.52
  10  20  -6  159.76  145.42
  10 -20   6  464.67  235.83
  10  20  -6  201.01  183.41
  10  20  -5  -15.07  131.58
 -10 -20  -5  592.23  256.85
  10  20  -5  335.17  166.32
 -10 -20  -4  347.69  265.44
  10  20  -4  882.06  180.55
  10  20  -4  466.24  159.84
  10 -20   4  531.15  192.70
 -10 -20  -3  143.10  248.67
  10  20  -3  241.39  135.58
  10  20  -2  402.08  140.21
  10 -20   2  295.03  216.07
 -10 -20  -2  494.30  232.51
 -10 -20  -1  140.72  249.79
  10 -20   1 -109.94  202.21
  10  20  -1   26.43  157.26
 -10  20   0  341.26  194.23
 -10 -20   0  233.87  253.01
  10  19 -18  100.13  168.25
  10  19 -18   87.91  209.81
 -10 -19 -18   89.42  198.38
 -10 -19 -18  191.17  179.59
  10 -19  18  151.56  273.44
  10  19 -17   94.61  154.08
  10  19 -17   43.23  193.91
 -10 -19 -17  -46.16  162.68
 -10 -19 -17   95.17  205.66
  10 -19  17   18.38  282.44
  10  19 -16    4.71  205.69
  10 -19  16  -67.28  202.84
 -10 -19 -16  -57.65  205.81
  10  19 -16  -16.28  205.10
 -10 -19 -16 -125.93  205.79
  10  19 -15  -51.64  214.78
 -10 -19 -15 -320.99  216.15
  10 -19  15 -169.75  212.51
 -10 -19 -15  177.38  215.30
  10  19 -15    5.17  214.99
  10  19 -14 -180.09  195.28
  10  19 -14 -176.97  195.06
 -10 -19 -14 -140.33  196.96
  10 -19  14  737.56  193.37
 -10 -19 -13 -124.73  204.65
  10  19 -13   96.26  201.95
  10 -19  13  143.12  200.80
  10  19 -13 -131.76  202.61
  10  19 -12  -57.92  199.92
  10 -19  12    0.24  199.39
  10  19 -12  -75.10  200.99
 -10 -19 -12  152.84  203.13
  10 -19  11  339.45  283.40
  10  19 -11  644.69  203.99
  10  19 -11  467.71  142.95
  10  19 -11  237.40  141.35
 -10 -19 -11  551.33  251.18
  10  19 -10  165.03  127.21
  10  19 -10   79.43  179.45
 -10 -19 -10  245.48  225.68
  10  19 -10  -31.42  131.47
  10 -19  10  259.07  254.92
  10 -19  10  -72.82  146.51
  10  19  -9  757.29  153.61
  10 -19   9  914.35  273.38
 -10 -19  -9  926.46  239.89
  10  19  -9  708.06  239.81
  10  19  -8  183.56  175.31
  10 -19   8 -114.90  173.46
  10 -19   8  100.32  225.86
  10  19  -8  -19.20  139.37
  10  19  -8  -98.40  128.62
 -10 -19  -8  291.45  209.78
  10 -19   7  111.43  173.37
  10  19  -7  358.02  132.67
 -10 -19  -7  315.46  213.27
  10  19  -7  349.86  170.58
  10  19  -7  349.39  144.98
 -10 -19  -6   53.04  216.21
  10  19  -6   18.33  187.02
  10  19  -6   45.97  138.72
  10 -19   6  152.66  169.98
  10 -19   5   77.79  167.83
  10  19  -5   16.98  132.42
 -10 -19  -5  152.69  241.28
  10  19  -4 -179.62  229.56
 -10 -19  -4  456.27  217.45
 -10 -19  -3  395.60  245.09
  10  19  -3  169.28  153.53
 -10 -19  -2  110.47  242.58
  10  19  -2   43.14  155.93
 -10  19   1  245.95  162.93
 -10 -19  -1   83.72  224.46
  10  19  -1  244.31  162.98
 -10 -19   0  104.35  240.96
 -10  19   0   96.02  165.38
 -10 -18 -19 -140.70  162.95
 -10 -18 -19 -168.24  164.80
  10 -18  19   11.97  162.78
  10  18 -19   40.09  165.39
 -10 -18 -18  -55.56  185.08
 -10 -18 -18  -58.32  181.81
  10  18 -18  238.80  189.89
  10 -18  18  -72.08  271.50
  10  18 -18   92.54  186.38
  10  18 -17 -248.25  178.94
  10 -18  17 -140.15  177.19
  10  18 -17  -24.13  180.01
 -10 -18 -17 -313.94  179.89
 -10 -18 -16   92.66  178.16
  10  18 -16  108.36  218.23
  10  18 -16  -55.79  153.56
  10 -18  16  506.68  272.79
 -10 -18 -16   33.50  204.52
  10 -18  15   15.59  182.09
  10  18 -15 -147.14  183.84
 -10 -18 -15  -70.21  184.59
  10  18 -15  -13.31  184.30
  10  18 -14  364.82  145.73
 -10 -18 -14  422.49  200.61
 -10 -18 -14  277.32  182.22
  10  18 -14  451.06  213.53
  10 -18  14  288.44  317.83
  10  18 -13  -84.96  175.26
  10  18 -13  207.04  175.66
  10 -18  13 -110.88  174.18
 -10 -18 -13 -156.80  177.42
  10 -18  12  485.27  278.38
 -10 -18 -12   43.69  189.29
  10  18 -12  367.77  142.94
  10  18 -12  471.09  194.32
  10  18 -11  -11.49  212.33
  10  18 -11  -63.51  205.65
  10  18 -11   -3.34  207.03
  10 -18  11 -120.05  205.61
 -10 -18 -11   48.88  209.13
  10 -18  10  319.43  240.28
 -10 -18 -10  434.63  215.67
  10  18 -10  353.62  184.22
  10  18 -10  298.87  133.19
  10  18 -10  224.80  127.17
  10 -18  10  337.20  131.04
 -10 -18  -9   -2.84  210.33
  10  18  -9   28.62  126.20
  10 -18   9  -64.35  150.74
  10  18  -9  178.32  186.35
  10 -18   9  -96.70  247.45
  10  18  -8  476.52  207.05
 -10 -18  -8  265.45  227.23
  10 -18   8  101.37  163.12
  10 -18   8  224.60  208.29
  10  18  -8  393.95  147.13
  10  18  -8  417.71  137.96
  10  18  -7  293.02  167.49
 -10 -18  -7  146.35  205.25
  10  18  -7  150.04  140.82
  10 -18   6  312.20  166.90
  10  18  -6  317.90  182.46
  10  18  -6  388.73  147.94
 -10 -18  -6  461.27  189.27
  10 -18   5  215.73  177.09
  10  18  -5  542.88  179.51
 -10 -18  -5  406.58  209.92
  10  18  -5  423.47  150.23
  10 -18   4  143.80  175.94
  10  18  -4  302.18  151.45
 -10 -18  -4  429.82  203.48
  10  18  -3  416.95  148.93
  10 -18   3  315.07  179.19
 -10 -18  -3  367.52  229.95
 -10 -18  -2  649.00  249.78
  10 -18   2  249.11  202.06
  10  18  -2  116.11  142.38
 -10 -18  -1  212.42  199.58
  10  18  -1  -82.53  169.34
 -10  18   1  285.31  159.50
 -10 -18   0  272.58  251.26
 -10  18   0  227.92  162.26
 -10 -17 -20  287.85  183.96
  10  17 -20  210.89  175.79
  10  17 -20  179.99  208.01
  10 -17  20  269.31  282.20
  10  17 -19  323.08  175.17
  10 -17  19 -235.30  174.00
  10  17 -19 -115.73  176.66
 -10 -17 -19  -58.79  173.81
 -10 -17 -19   89.29  176.00
 -10 -17 -18  135.48  193.22
  10  17 -18  -50.04  201.70
  10 -17  18  -98.94  256.64
 -10 -17 -18  332.55  181.09
  10  17 -18  -33.73  160.49
  10  17 -17  305.23  144.79
 -10 -17 -17  241.10  185.39
  10  17 -17   37.33  196.87
  10 -17  17    2.76  257.19
  10  17 -16  459.96  226.57
 -10 -17 -16  196.04  223.84
 -10 -17 -16  115.29  171.33
  10  17 -16  244.84  142.75
  10 -17  16 -455.81  249.99
  10  17 -15   33.90  177.70
 -10 -17 -15  -22.39  178.81
 -10 -17 -15 -141.99  178.73
  10 -17  15  -26.45  176.19
  10  17 -15  114.91  178.41
 -10 -17 -14  -15.40  164.47
  10  17 -14   83.74  137.34
  10 -17  14  530.81  283.97
  10  17 -14   48.37  202.13
 -10 -17 -13  164.47  161.82
  10 -17  13 -283.68  249.26
  10  17 -13   94.94  134.99
 -10 -17 -13  321.62  169.68
  10  17 -13  -93.05  200.21
  10  17 -12  477.49  191.87
 -10 -17 -12  217.35  212.21
  10 -17  12  349.52  251.87
  10  17 -12  254.40  133.87
  10 -17  11 -460.39  166.25
  10  17 -11  -34.54  169.49
  10  17 -11   27.62  166.32
  10  17 -11    4.62  167.35
 -10 -17 -11 -140.89  169.01
 -10 -17 -10  -48.15  194.62
  10 -17  10   42.25  232.83
  10  17 -10   80.37  120.62
  10 -17  10  173.58  128.16
  10  17 -10   -5.07  177.79
  10  17 -10  199.92  126.70
  10  17  -9   14.76  133.71
  10 -17   9    7.38  199.26
  10  17  -9  141.85  131.87
  10  17  -9  -67.98  163.94
  10 -17   9  -38.42  135.86
 -10 -17  -9  -34.49  212.52
  10  17  -8  282.83  118.87
  10 -17   8  227.21  143.71
  10  17  -8   14.64  172.26
  10  17  -8  261.94  136.53
 -10 -17  -8   97.57  221.84
  10  17  -7  -11.81  135.18
  10  17  -7   30.23  123.49
  10  17  -7   59.59  166.38
 -10 -17  -7  147.34  192.21
  10 -17   6  221.87  168.47
 -10 -17  -6 -146.17  200.24
  10  17  -6  222.13  169.13
  10 -17   5   52.15  214.86
 -10 -17  -5  -59.80  215.13
  10  17  -5 -131.22  222.13
  10  17  -4   20.03  138.79
  10 -17   4  157.24  156.98
 -10 -17  -4  106.55  228.77
 -10 -17  -3  304.61  235.41
  10 -17   3  404.55  183.26
  10  17  -3  424.30  151.81
  10 -17   2  -21.34  160.15
 -10 -17  -2  215.37  248.11
 -10 -17  -1  424.17  249.52
 -10  17   1  347.95  188.32
  10 -17   1  493.78  195.68
  10  17  -1  413.03  150.50
 -10 -17   0  298.63  241.11
 -10  17   0   97.04  175.62
 -10 -16 -21  120.86  183.99
  10  16 -21  452.38  181.93
  10 -16  21  135.95  274.52
  10  16 -21  146.12  212.76
  10  16 -20    8.03  166.22
  10 -16  20 -143.41  164.28
 -10 -16 -20  -85.95  165.37
 -10 -16 -20  -82.58  162.93
  10  16 -20  -50.97  164.80
 -10 -16 -19  568.32  170.88
  10 -16  19  683.10  261.89
  10  16 -19  129.34  184.07
  10  16 -19  263.69  234.07
 -10 -16 -19  549.31  214.03
 -10 -16 -18  -33.69  211.22
  10 -16  18  -62.79  210.84
 -10 -16 -18  -96.73  213.54
  10  16 -18   -5.19  214.12
  10  16 -17  364.30  149.77
  10 -16  17  363.78  262.80
 -10 -16 -17  440.56  186.55
  10 -16  16  273.72  225.70
  10  16 -16   33.80  136.68
 -10 -16 -16   42.41  212.91
 -10 -16 -16  263.89  185.65
  10  16 -16  264.82  207.11
  10  16 -15  -41.06  175.70
  10  16 -15   27.06  174.70
 -10 -16 -15   41.98  175.77
 -10 -16 -15  -47.04  176.08
  10 -16  15   15.03  173.43
  10  16 -14   18.54  134.63
  10  16 -14 -158.23  201.55
  10 -16  14   29.39  268.09
 -10 -16 -14  166.73  172.87
 -10 -16 -14  -49.44  167.29
 -10 -16 -13  -81.04  162.83
 -10 -16 -13 -109.61  163.73
  10  16 -13 -136.82  162.15
  10  16 -13  -49.06  162.20
  10 -16  13 -276.49  161.02
  10  16 -12  -25.31   87.04
 -10 -16 -12   74.25  146.13
  10  16 -12    2.33  196.14
  10 -16  12   -7.40  227.03
  10  16 -12  196.77  131.85
 -10 -16 -12  323.92  210.71
 -10 -16 -11  347.37  199.19
  10 -16  11  -25.48  107.79
  10 -16  11  107.87  261.34
  10  16 -11  329.17  180.75
  10  16 -11  -84.76  135.26
  10  16 -10   33.00  109.80
  10  16 -10  174.39  191.53
 -10 -16 -10  459.53  222.83
  10 -16  10  122.12  118.08
  10  16 -10  277.78  122.17
  10 -16  10   32.91  198.71
  10 -16   9  448.09  195.42
  10  16  -9  460.55  178.27
  10 -16   9  352.72  152.45
  10  16  -9  199.97  113.60
  10  16  -9  319.36  126.23
 -10 -16  -9  257.88  194.80
  10  16  -8  306.19  130.20
  10 -16   8  445.04  164.50
  10  16  -8  388.04  121.39
  10  16  -8  536.78  181.99
 -10 -16  -8  470.02  177.33
  10  16  -7  590.04  153.04
  10  16  -7  949.00  223.89
  10 -16   7  851.78  175.26
 -10 -16  -7 1195.98  232.67
 -10 -16  -6  769.18  238.37
  10  16  -6  691.75  150.09
  10 -16   5  478.03  199.82
  10  16  -5  568.72  150.17
 -10 -16  -5  346.28  222.31
  10 -16   4  539.58  187.30
 -10 -16  -4  582.04  223.97
  10  16  -4  463.84  146.27
 -10  16   4  506.89  159.88
  10  16  -3 -134.59  232.80
  10 -16   3  -57.85  227.06
 -10 -16  -3   49.31  226.31
 -10  16   3   11.42  227.05
  10  16  -2  227.17  135.76
 -10 -16  -2  286.53  230.44
 -10  16   2  458.83  171.35
  10 -16   2  415.38  186.67
  10  16  -1  348.35  133.73
  10 -16   1  562.80  170.63
 -10 -16  -1  390.77  242.47
 -10 -16   0  561.42  220.90
 -10 -15 -21 -172.28  190.92
  10  15 -21 -315.13  229.56
  10  15 -21  289.67  182.15
  10 -15  21  213.61  272.75
 -10 -15 -20   -2.71  195.53
  10  15 -20  -11.94  185.93
  10  15 -20   91.23  201.52
  10 -15  20    1.25  263.53
 -10 -15 -20   -3.38  132.43
 -10 -15 -19  -67.66  184.25
  10  15 -19   31.19  187.60
  10 -15  19 -138.70  185.22
  10  15 -19  131.41  185.72
 -10 -15 -19  -22.78  186.73
  10 -15  18 -336.18  215.05
 -10 -15 -18   68.68  215.05
 -10 -15 -18  121.70  217.53
  10  15 -18  -80.03  218.25
  10  15 -18   82.74  215.95
  10  15 -17   51.35  131.37
  10 -15  17  120.04  226.03
 -10 -15 -17   97.12  202.30
 -10 -15 -17  338.99  180.83
  10  15 -17 -206.30  227.15
  10 -15  16   33.86  224.61
  10  15 -16   98.83  218.41
 -10 -15 -16   92.44  195.47
  10  15 -16  -28.55  137.18
 -10 -15 -16   40.67  163.63
  10  15 -15   60.49  127.53
  10 -15  15   56.78  244.37
  10  15 -15  242.95  208.31
 -10 -15 -15  141.82  180.98
 -10 -15 -15  120.32  168.18
 -10 -15 -14  219.74  163.58
  10  15 -14   58.82  209.47
 -10 -15 -14   39.23  177.84
  10 -15  14  199.93  233.76
  10  15 -14   81.12  117.33
 -10 -15 -13  452.71  159.79
  10  15 -13  364.86  217.20
  10  15 -13  377.54  130.78
 -10 -15 -13  532.34  198.77
  10 -15  13  248.38  238.43
 -10 -15 -12  311.58  193.93
  10 -15  12  477.96  243.04
  10  15 -12  287.04  123.63
  10  15 -12  558.04  199.21
 -10 -15 -12  434.40  168.30
  10 -15  11  514.09  102.17
  10  15 -11  461.24  121.38
 -10 -15 -11  409.35  178.32
 -10 -15 -11  726.41  155.56
  10  15 -11  449.44  177.08
  10 -15  11  427.81  220.67
  10  15 -10  303.76  128.29
  10  15 -10  320.07  201.59
  10 -15  10  403.37  121.95
  10 -15  10  202.77  208.21
 -10 -15 -10  283.99  149.10
  10  15 -10  256.91  106.34
 -10 -15 -10  598.36  225.81
  10 -15   9  313.65  231.32
 -10 -15  -9  262.30  176.27
  10  15  -9  224.23  116.32
  10  15  -9  291.89  177.05
  10 -15   9  341.43  125.75
  10 -15   8  338.20  209.79
  10  15  -8  357.82  115.43
 -10 -15  -8  327.21  202.11
  10  15  -8  -79.71  177.11
  10 -15   8  299.19  143.64
  10 -15   7  600.29  202.88
  10  15  -7  212.44  181.80
  10 -15   7  372.52  155.01
 -10 -15  -7   65.31  185.53
  10  15  -7  199.80  107.01
  10  15  -7   42.40  128.79
  10  15  -6  129.61  136.06
 -10 -15  -6  347.20  197.21
  10 -15   6  114.57  146.34
  10  15  -5   73.04  120.08
 -10 -15  -5  115.22  201.23
 -10 -15  -4  462.05  211.26
  10 -15   4  445.34  162.41
  10  15  -4  241.83  135.05
  10  15  -3  571.21  130.64
 -10 -15  -3  504.28  241.46
  10  15  -2  179.85  142.78
 -10 -15  -2  309.49  217.67
 -10 -15  -1  255.04  227.82
  10  15  -1  111.47  141.11
 -10  15   0  319.06  174.22
 -10 -15   0  -97.90  226.11
  10  14 -22   60.96  179.24
  10  14 -22  198.87  227.84
 -10 -14 -22   -5.23  187.69
  10 -14  22  119.05  280.15
 -10 -14 -21  370.82  201.28
  10 -14  21   41.94  285.89
  10  14 -21 -157.17  242.52
 -10 -14 -21   74.69  158.85
  10  14 -21  220.05  198.77
  10 -14  20  -54.68  272.46
  10  14 -20   50.33  155.34
  10  14 -20   89.22  229.23
 -10 -14 -20  -97.70  138.93
 -10 -14 -20  145.85  187.47
  10 -14  19  -29.76  239.60
 -10 -14 -19  274.06  197.74
  10  14 -19  -89.93  220.28
 -10 -14 -19  203.59  182.42
  10  14 -19  157.84  151.71
 -10 -14 -18   20.17  193.58
  10 -14  18  -60.94  235.95
 -10 -14 -18   60.29  257.83
  10  14 -18   94.41  158.89
  10  14 -18  108.18  236.74
  10  14 -17  400.68  234.43
 -10 -14 -17  393.56  176.66
  10 -14  17  311.14  255.09
 -10 -14 -17  321.99  209.83
  10  14 -17  304.95  144.69
  10 -14  16  186.14  219.03
 -10 -14 -16  431.10  166.77
  10  14 -16  284.05  143.73
  10  14 -16  227.37  219.20
 -10 -14 -16  344.51  194.75
  10 -14  15   95.35  245.46
 -10 -14 -15  243.04  177.35
  10  14 -15  212.89  123.85
 -10 -14 -15  252.11  168.90
  10  14 -14  139.03  215.77
  10  14 -14  235.85  116.49
  10 -14  14   38.35  250.11
 -10 -14 -14  297.99  162.83
 -10 -14 -14  112.98  162.37
  10 -14  13  131.56  221.02
  10  14 -13   80.79  118.70
  10  14 -13  262.68  187.80
 -10 -14 -13   58.85  146.84
 -10 -14 -13  -24.51  212.70
  10 -14  12  158.56  247.28
 -10 -14 -12   64.81  188.71
  10  14 -12  -30.16   67.52
  10  14 -12  189.47  106.78
  10  14 -12  -77.32  186.60
 -10 -14 -12  463.95  142.69
 -10 -14 -11  -31.02  137.52
  10  14 -11   79.00  173.40
  10  14 -11  122.06   77.74
  10  14 -11   70.93  108.96
  10 -14  11  -90.93  211.84
 -10 -14 -11  139.49  181.76
  10 -14  11  207.01   92.43
  10  14 -10   -9.09  181.21
  10 -14  10  133.86  214.06
 -10 -14 -10   14.99  175.95
  10  14 -10   -6.31  126.91
 -10 -14 -10   12.09  144.28
  10 -14  10  101.54  105.05
 -10 -14  -9 -360.43  159.19
 -10 -14  -9 -108.72  157.41
  10 -14   9  198.77  157.66
  10  14  -9  156.07  158.47
  10  14  -9  -69.49  157.16
  10  14  -8  -14.84  161.45
 -10 -14  -8  145.73  129.61
  10  14  -8  -39.82  110.97
  10 -14   8   34.01  126.61
 -10 -14  -8  217.61  199.20
  10  14  -7   -7.00  175.89
  10 -14   7 -124.56  175.83
 -10 -14  -7 -210.48  176.63
 -10 -14  -6  -76.70  192.37
  10  14  -6  178.59  129.69
 -10 -14  -5  404.39  193.83
  10  14  -5   24.56   96.08
 -10 -14  -4  523.04  211.17
  10  14  -4  499.61  146.60
  10  14  -3  225.76  137.16
 -10 -14  -3  552.51  210.03
 -10 -14  -2  266.17  229.27
 -10 -14   0  188.15  228.87
 -10 -13 -23  358.73  198.31
  10  13 -23 -107.98  164.35
  10 -13  23  160.57  271.46
  10  13 -23  222.98  230.21
  10 -13  22  446.68  310.54
 -10 -13 -22   29.50  125.44
  10  13 -22  125.08  177.12
 -10 -13 -22  179.27  188.68
  10  13 -21  -20.38  182.88
  10  13 -21   59.30  181.92
 -10 -13 -21 -280.86  181.68
  10 -13  21  -79.06  182.88
  10 -13  20   82.08  269.34
  10  13 -20  129.28  238.72
 -10 -13 -20  198.82  185.64
 -10 -13 -20   -1.57  138.36
  10  13 -20  119.20  146.58
  10  13 -19 -106.54  195.43
 -10 -13 -19  -51.19  196.36
 -10 -13 -19 -179.64  193.88
  10  13 -19  138.13  197.45
  10 -13  19 -134.03  195.65
  10  13 -18  202.03  143.35
  10  13 -18  -26.65  212.47
 -10 -13 -18  243.09  190.82
 -10 -13 -18    6.01  220.40
  10 -13  18  144.44  244.14
  10  13 -17  136.33  193.85
 -10 -13 -17  -32.40  201.04
  10  13 -17   -4.18  147.64
  10 -13  17 -381.32  248.06
 -10 -13 -17  308.60  165.64
 -10 -13 -16  136.00  172.61
 -10 -13 -16   97.77  162.03
  10 -13  16  183.67  228.69
  10  13 -16  171.65  208.25
  10  13 -16  240.56  128.27
  10  13 -15  320.54  193.81
  10 -13  15   32.37  223.89
 -10 -13 -15  390.58  177.14
 -10 -13 -15  309.27  183.99
  10  13 -15  204.33  122.71
  10  13 -14  489.97  129.33
 -10 -13 -14  828.66  167.91
 -10 -13 -14  548.12  176.63
  10 -13  14  600.58  245.78
  10  13 -14  654.45  232.89
  10  13 -13  230.75  125.59
 -10 -13 -13  580.73  192.08
 -10 -13 -13  390.41  159.34
  10  13 -13  314.10  187.32
  10 -13  13  476.14  249.19
  10  13 -12  974.04  216.36
 -10 -13 -12  931.92  160.25
  10  13 -12  751.95  131.07
  10  13 -12  574.09   67.93
  10 -13  12  883.13  243.42
 -10 -13 -12  581.25  179.82
 -10 -13 -11  106.79  176.23
  10 -13  11   75.92  225.77
  10  13 -11  173.73  114.96
  10  13 -11  216.34  186.17
  10  13 -11  102.35   72.21
 -10 -13 -11  427.88  148.05
 -10 -13 -10  202.93  202.64
  10  13 -10  199.62  172.68
  10 -13  10   63.81  207.51
  10  13 -10    9.67  110.77
  10 -13  10  133.64  101.22
 -10 -13 -10  369.28  142.24
 -10 -13  -9  467.13  149.87
 -10 -13  -9  372.83  172.54
  10  13  -9  427.53  188.74
  10 -13   9  273.14  119.79
  10  13  -9  569.14  108.23
  10 -13   9  486.41  223.11
  10  13  -9  275.14   95.98
  10 -13   8   80.06  193.20
 -10 -13  -8  345.87  130.53
  10  13  -8  310.04  109.60
  10  13  -8  148.78  154.99
 -10  13   8  156.83   55.63
 -10 -13  -8  112.89  177.97
  10  13  -7  175.84  117.82
 -10 -13  -7  129.99  187.83
  10  13  -6  124.81  128.33
  10  13  -6   -2.77  114.49
 -10 -13  -6  180.51  229.98
  10  13  -5  931.33  157.02
 -10 -13  -5  872.50  224.64
  10  13  -4   24.88  124.05
 -10 -13  -4  374.52  202.52
 -10 -13  -3 1225.00  277.66
  10  13  -3 1365.64  171.59
  10  13  -2  150.65  146.89
 -10 -13  -2  568.84  239.80
 -10 -13   0  122.82   61.08
 -10 -13   0  284.68  233.45
  10 -12  23  105.02  176.52
  10  12 -23   99.77  173.65
  10  12 -23 -179.85  174.30
 -10 -12 -23  -65.64  172.69
 -10 -12 -22  -23.87  187.83
  10  12 -22 -158.72  189.02
  10 -12  22 -435.95  190.91
 -10 -12 -21  235.57  139.92
  10  12 -21  129.48  168.26
 -10 -12 -21  360.24  210.99
  10 -12  21 -158.58  275.31
  10  12 -21   73.81  226.97
  10 -12  20   45.73  184.81
 -10 -12 -20 -263.32  183.85
  10  12 -20   98.29  185.17
  10  12 -20 -171.97  183.91
  10  12 -19  202.51  149.23
  10  12 -19  297.92  232.72
  10 -12  19 -254.48  261.07
 -10 -12 -19  279.82  184.72
 -10 -12 -19  209.23  173.35
  10  12 -18 -387.89  208.23
 -10 -12 -18  177.82  209.45
 -10 -12 -18   -8.30  207.29
  10  12 -18 -108.53  210.64
  10 -12  18  -95.76  208.42
 -10 -12 -17  130.00  189.70
  10  12 -17  -97.00  208.17
 -10 -12 -17  252.74  170.50
  10  12 -17  201.00  128.00
  10 -12  17  -12.66  242.71
  10 -12  16    7.36  156.14
 -10 -12 -16  162.41  158.05
  10  12 -16  -30.44  158.42
  10  12 -16   17.63  156.44
 -10 -12 -16 -114.93  156.76
  10 -12  15  -95.81  224.73
 -10 -12 -15  158.59  139.02
 -10 -12 -15  -56.76  162.00
  10  12 -15   81.55  170.05
  10  12 -15   16.26  125.49
  10  12 -14  346.93  174.96
 -10 -12 -14   66.77  151.36
 -10 -12 -14  -38.88  169.10
  10 -12  14   86.17  214.11
  10  12 -14  -55.02  120.34
 -10 -12 -13   42.20  143.49
  10 -12  13    3.48  223.86
 -10 -12 -13  125.69  163.45
  10  12 -13   -9.72  107.05
  10  12 -13  133.63  170.28
 -10 -12 -12  646.40  157.01
 -10 -12 -12  504.29  179.35
  10  12 -12  422.43  184.73
  10  12 -12  573.47  118.78
  10  12 -11   72.31  104.15
  10 -12  11   10.57  242.75
  10  12 -11   17.90   64.15
  10  12 -11  227.55  169.12
 -10 -12 -11  142.40  172.81
 -10 -12 -11   29.17  140.07
  10 -12  10 1249.76  249.62
  10  12 -10 1112.14  213.20
  10 -12  10 1421.04  131.68
  10  12 -10  990.72   98.46
 -10 -12 -10 1165.84  226.02
 -10 -12 -10 1508.75  186.04
  10  12 -10 1054.91  157.17
  10  12  -9  195.81  158.64
  10 -12   9  149.68  105.48
  10  12  -9  149.45  115.63
  10  12  -9   40.59   84.31
 -10 -12  -9  113.05  158.40
 -10 -12  -9  226.08  138.08
 -10 -12  -8 1503.01  212.17
 -10 -12  -8 1462.98  181.79
  10  12  -7  215.00  143.73
 -10 -12  -7  101.90  124.73
  10  12  -7  -65.84  107.66
 -10 -12  -7  -15.40  187.43
 -10 -12  -6  802.14  130.79
  10  12  -6  454.36  130.98
  10  12  -6  557.56  121.53
 -10 -12  -6  725.21  198.22
 -10 -12  -5  451.27  187.00
  10  12  -5  257.43  117.30
  10  12  -4  221.93  138.23
 -10 -12  -4  332.94  216.68
 -10 -12  -3  726.92  224.88
  10  12  -3  357.14  138.74
 -10 -12   0  170.03  225.67
 -10  12   0  245.37   72.57
 -10 -12   0  221.00   70.03
 -10  12   0  329.56  158.94
  10  11 -24 -113.20  167.70
 -10 -11 -24   38.63  167.02
  10  11 -23 -445.60  199.79
 -10 -11 -23  -13.49  197.40
  10  11 -23    8.15  198.44
  10 -11  23 -216.09  202.72
  10  11 -22  -97.68  219.30
  10  11 -22  172.37  174.04
 -10 -11 -22  151.26  196.74
 -10 -11 -22   41.30  137.35
  10 -11  22   52.95  273.89
  10 -11  21   -9.29  264.67
  10  11 -21  123.82  151.68
  10  11 -21  333.43  237.07
 -10 -11 -21   66.37  129.99
 -10 -11 -21  234.73  192.30
  10  11 -20  190.67  155.94
 -10 -11 -20  303.05  182.00
  10  11 -20   38.38  209.41
  10 -11  20  -16.97  243.41
 -10 -11 -20    9.05  139.57
  10  11 -19  119.54  129.37
 -10 -11 -19 -152.49  176.69
 -10 -11 -19  -18.95  158.13
  10  11 -19  191.41  207.68
  10 -11  19   18.63  303.83
 -10 -11 -18 -107.98  183.05
  10  11 -18   33.50  182.50
  10 -11  18 -184.05  182.94
 -10 -11 -18   38.70  181.67
  10  11 -18   57.43  184.47
 -10 -11 -17  189.46  173.37
  10 -11  17  236.88  247.31
 -10 -11 -17  112.84  193.04
  10  11 -17  -13.55  146.54
  10  11 -17  111.72  223.69
  10  11 -16  -59.78  127.44
 -10 -11 -16  162.18  169.86
  10 -11  16  186.13  245.65
  10  11 -16  -42.95  169.62
 -10 -11 -16  230.58  155.33
 -10 -11 -15  342.55  168.91
  10 -11  15    5.35  228.68
 -10 -11 -15   21.62  143.39
  10  11 -15   40.67  134.76
  10  11 -15  -76.56  160.47
 -10 -11 -14   86.02  156.27
  10  11 -14  -38.88  121.84
  10 -11  14   -2.66  230.31
  10  11 -14   61.34  163.81
 -10 -11 -14  239.14  150.42
  10  11 -13  279.43  166.84
 -10 -11 -13  288.28  150.10
  10  11 -13  221.18  111.92
  10 -11  13   87.25  223.79
 -10 -11 -13 -233.24  162.40
  10  11 -12  -42.12  150.16
 -10 -11 -12  238.20  167.17
 -10 -11 -12  144.76  139.51
 -10 -11 -11  578.01  188.25
  10  11 -11  324.22  150.61
 -10 -11 -11  221.07  138.54
  10  11 -11  422.30  114.74
  10  11 -10   -6.31   60.70
 -10 -11 -10   30.98  126.89
  10  11 -10  -10.81  101.65
  10  11 -10  -10.89  184.00
  10 -11  10  125.40  186.80
 -10 -11 -10   11.68  169.04
 -10 -11  -9  563.06  169.52
  10  11  -9  561.84   81.06
  10  11  -9  587.01  160.07
 -10 -11  -9  522.03  134.15
 -10 -11  -8  386.66  170.87
  10  11  -8  375.55  157.86
 -10 -11  -8  241.81  125.47
 -10 -11  -7  327.74  194.35
 -10 -11  -7  560.07  139.06
 -10 -11  -6   36.13  113.50
  10  11  -6   49.55  130.03
  10  11  -6  -11.35   99.74
 -10 -11  -6  -39.02  190.79
  10  11  -5  156.33  118.84
 -10 -11  -5  564.48  213.37
 -10 -11  -4  718.46  205.51
 -10  11   0    6.86   84.32
 -10 -11   0   54.19   95.32
 -10 -11   0 -102.78  214.89
  10  10 -24  -58.05  190.71
 -10 -10 -24   58.49  187.38
 -10 -10 -24 -230.44  186.05
  10  10 -24 -192.18  188.00
  10 -10  23  -31.38  279.62
  10  10 -23   74.71  217.03
 -10 -10 -23  186.84  190.77
 -10 -10 -23  173.87  185.09
  10  10 -23  -45.40  156.78
 -10 -10 -22   65.99  142.34
  10  10 -22   31.83  145.08
 -10 -10 -22   45.36  143.33
  10 -10  22 -172.26  147.03
  10  10 -22   18.48  144.22
 -10 -10 -21  356.24  197.73
  10 -10  21  136.34  267.15
  10  10 -21  -78.49  140.46
  10  10 -20   -1.25  129.21
 -10 -10 -20 -145.21  127.70
 -10 -10 -20  120.35  128.42
  10  10 -20  141.03  129.53
  10 -10  20  -54.97  130.25
  10 -10  19 -265.55  153.46
  10  10 -19   94.00  153.56
 -10 -10 -19   64.61  151.38
 -10 -10 -19   12.53  152.14
  10  10 -19  -78.55  152.61
 -10 -10 -18  120.66  190.84
  10 -10  18  352.38  267.13
  10  10 -18   83.70  129.44
 -10 -10 -18  150.87  167.49
  10  10 -18   92.14  181.64
 -10 -10 -17  366.00  168.80
  10  10 -17  396.47  138.37
 -10 -10 -17  436.37  183.15
  10 -10  17  428.99  262.40
 -10 -10 -16  520.40  169.04
 -10 -10 -16  484.11  163.48
  10  10 -16  675.55  189.41
  10  10 -16  500.91  127.55
  10 -10  16  581.91  232.43
  10  10 -15  919.56  194.98
 -10 -10 -15  834.74  191.76
  10 -10  15  953.54  268.84
  10  10 -15  705.70  152.21
 -10 -10 -15  916.74  174.08
  10 -10  14  107.96  230.40
  10  10 -14  152.14  173.50
 -10 -10 -14  466.99  148.00
  10  10 -14  504.52  129.03
 -10 -10 -14  423.96  177.91
 -10 -10 -13 1074.67  182.96
  10  10 -13 1194.97  163.96
 -10 -10 -13 1051.89  168.17
  10 -10  13 1048.47  252.71
  10  10 -13 1007.18  215.61
 -10 -10 -12  260.01  168.25
 -10 -10 -12  194.85  138.27
  10  10 -12 -284.31  164.50
  10  10 -11  526.45  187.39
 -10 -10 -11  639.52  194.34
 -10 -10 -11  785.85  151.83
 -10 -10 -10  383.03  197.97
 -10 -10 -10  541.11  146.19
  10  10 -10  567.11  176.12
 -10 -10  -9  351.26  165.21
  10  10  -9  262.51  148.68
 -10 -10  -9  125.36  119.95
  10  10  -8  505.21  164.18
 -10 -10  -8  557.52  139.43
 -10 -10  -8  432.16  176.47
  10  10  -8  568.29   90.55
 -10 -10  -7    4.57  175.11
 -10 -10  -7   40.11  116.10
 -10 -10  -6  424.20  107.13
 -10 -10  -6  611.26  134.49
 -10 -10  -6  731.04  191.35
 -10 -10  -5  457.18  201.02
 -10  10   0 1170.88  124.10
 -10 -10   0  873.91  119.87
 -10 -10   0 1436.50  303.18
  10   9 -24  107.62  140.33
 -10  -9 -24  152.07  164.41
  10   9 -24   52.68  199.60
 -10  -9 -24  184.65  172.45
  10   9 -23   26.62  152.21
  10   9 -23  -54.80  216.64
 -10  -9 -23  135.40  175.19
  10  -9  23  110.61  286.97
 -10  -9 -22   65.51  182.66
  10   9 -22  245.96  146.91
  10   9 -22  303.59  226.47
  10  -9  22  140.75  299.42
  10  -9  21 -234.50  303.24
 -10  -9 -21  102.40  186.62
  10   9 -21   87.57  194.19
 -10  -9 -21  -28.73  122.66
  10   9 -21  104.99  144.97
 -10  -9 -20  401.34  166.46
  10   9 -20  358.07  183.22
 -10  -9 -20  346.82  136.79
  10  -9  20   51.57  285.17
  10   9 -20  348.20  148.30
  10  -9  19  -92.12  274.24
  10   9 -19  218.92  191.15
  10   9 -19   33.43  140.96
 -10  -9 -19  118.44  141.37
 -10  -9 -19 -259.52  178.55
  10   9 -18  513.20  158.31
  10  -9  18  336.64  252.45
 -10  -9 -18  464.11  166.27
 -10  -9 -18  602.40  181.30
  10   9 -18  483.87  188.93
 -10  -9 -17  144.97  170.18
  10   9 -17  -12.75  194.41
  10   9 -17   52.89  123.48
  10  -9  17  173.47  245.26
 -10  -9 -17  269.39  167.35
  10   9 -16  426.30  130.92
  10   9 -16  208.74  170.00
 -10  -9 -16  392.27  164.03
  10  -9  16  324.27  228.04
 -10  -9 -16 -162.32  173.91
 -10  -9 -15  350.81  160.68
  10   9 -15  196.62  122.20
 -10  -9 -15  546.85  155.32
  10  -9  15   77.08  226.45
 -10  -9 -14  144.03  166.34
  10   9 -14  -42.41  167.45
  10   9 -14 -257.32  165.54
  10  -9  14  -64.31  165.30
 -10  -9 -14   41.03  166.31
 -10  -9 -13  231.37  176.94
 -10  -9   0  717.02  113.25
 -10  -9   0  578.51  107.76
 -10  -9   0  917.12  237.16
 -10  -8 -25  -18.89  176.11
  10   8 -25  300.07  227.45
  10   8 -25  -25.04  156.20
 -10  -8 -24  158.59  164.20
 -10  -8 -24  102.18  165.36
  10   8 -24 -299.10  169.44
  10  -8  23   96.41  289.84
  10   8 -23  312.59  225.98
 -10  -8 -23  149.86  197.55
 -10  -8 -23  162.78  167.30
  10   8 -23  137.20  142.52
 -10   8  22  -38.41  176.47
 -10  -8 -22  -11.79  177.25
  10   8 -22  149.32  180.64
  10   8 -22  -61.17  178.20
  10  -8  22 -183.36  183.47
 -10  -8 -21   36.45  179.86
  10   8 -21  192.21  201.09
  10  -8  21  140.78  293.38
 -10  -8 -20  -93.34  176.52
  10   8 -20   22.33  178.21
  10  -8  20   -8.44  180.74
  10   8 -20  -87.44  178.96
  10  -8  19    0.70  247.08
  10   8 -19   75.32  120.96
  10   8 -19   68.24  171.45
 -10  -8 -19  264.38  187.92
  10   8 -18   39.88  152.57
 -10  -8 -18 -123.98  150.62
  10  -8  18 -251.56  152.66
 -10  -8 -18   40.38  151.13
  10   8 -17    8.08  118.05
  10  -8  17 -312.58  231.72
 -10  -8 -17  158.07  160.31
 -10  -8 -17  279.35  171.43
  10   8 -17  -88.92  172.29
 -10  -8 -16  289.90  142.67
  10  -8  16   76.61  225.41
  10   8 -16  127.47  172.20
 -10  -8 -16   56.74  150.80
  10   8 -16   56.31  112.97
 -10  -8 -15  349.41  152.47
  10   8 -15  138.07  166.40
  10   8 -15  308.18  119.82
 -10  -8 -15  320.52  165.64
  10  -8  15   20.33  226.27
  10   8 -14  465.77  182.37
 -10  -8 -14  619.78  144.84
  10  -8  14   94.88  223.88
 -10  -8 -14  421.45  155.66
  10   8 -14  403.48  128.91
 -10   8   0   16.69   95.16
 -10   8   0   20.26  113.87
 -10  -8   0   92.68  197.41
  10   7 -25   35.79  158.28
 -10  -7 -25  117.18  180.33
  10   7 -25  126.44  208.13
 -10  -7 -25  -15.97  169.17
  10   7 -24   77.62  147.38
 -10  -7 -24  223.36  183.44
  10   7 -24  339.06  220.94
  10   7 -23 -104.72  192.05
 -10  -7 -23    2.60  187.30
 -10  -7 -23  -25.11  186.27
  10  -7  23  -38.39  195.73
  10   7 -22  281.64  207.26
  10   7 -22  141.72  163.90
  10  -7  22  -11.63  259.23
 -10  -7 -22   55.85  183.79
 -10  -7 -22  159.28  194.24
  10   7 -21    1.71  184.66
  10   7 -21 -181.94  187.09
 -10  -7 -21   34.47  183.31
  10  -7  21  151.60  189.54
 -10  -7 -21 -205.48  183.47
 -10   7  20  416.42  252.34
 -10  -7 -20  450.49  166.15
  10   7 -20  571.33  217.10
 -10  -7 -20  394.54  142.05
 -10  -7 -20  533.97  174.15
  10  -7  20  282.69  244.92
  10  -7  19  100.35  238.95
 -10  -7 -19  100.19  119.90
 -10  -7 -19  118.89  164.47
 -10  -7 -18  612.20  187.05
  10   7 -18  632.05  210.83
  10   7 -18  662.54  150.55
  10  -7  18  508.32  236.28
  10   7 -17  107.55  181.01
 -10  -7 -17  -13.84  161.14
  10  -7  17  131.26  225.95
 -10   7  17   15.27   80.69
 -10  -7 -17  -68.70  158.14
  10   7 -17   30.85  115.03
 -10  -7 -16  179.74  149.63
  10   7 -16  377.93  176.03
  10  -7  16   90.43  217.81
  10   7 -16  327.96  127.17
  10   7 -15   53.27  180.96
  10   7 -15   91.99  116.49
  10  -7  15  155.75  209.46
 -10  -7 -15  162.99  147.69
  10  -7  14 -294.67  143.19
 -10  -7 -14 -194.61  143.67
  10   7 -14 -265.14  143.27
 -10  -7 -14 -128.70  142.31
  10   7 -14  -53.77  144.72
 -10  -7 -12  171.61  160.68
 -10  -7 -12  169.10   87.91
 -10  -7 -11 -227.66   94.70
 -10  -7  -2  673.36  210.07
 -10  -7  -1 1134.89  238.78
 -10  -7  -1  695.81  100.81
  10   7  -1  889.22  135.07
 -10   7   0 1106.06  134.82
 -10  -7   0 1199.95  269.52
 -10  -7   0  765.64   92.00
 -10   7   0  965.57  153.67
  10   6 -25   86.84  176.06
 -10  -6 -25  147.89  171.75
  10   6 -25 -178.68  163.78
  10   6 -24   51.74  193.80
 -10  -6 -24  -68.98  192.10
  10   6 -23 -206.66  184.76
  10   6 -23  260.44  179.90
 -10  -6 -23 -114.55  179.66
 -10  -6 -23   21.89  178.46
  10   6 -22  -45.19  163.26
  10  -6  22 -383.49  165.88
 -10  -6 -22   49.19  158.52
 -10  -6 -22   29.59  159.23
 -10  -6 -21   61.01  172.11
  10  -6  21  -38.89  178.60
  10   6 -21 -235.33  176.31
  10   6 -21  161.27  173.29
  10   6 -20   -4.61  122.34
 -10  -6 -20  202.18  173.00
  10   6 -20  -95.30  189.79
 -10  -6 -20  120.25  161.33
  10  -6  20  -55.31  230.82
  10   6 -19 -305.54  156.95
 -10   6  19  171.72  154.05
 -10  -6 -19   67.69  154.75
 -10  -6 -19  -71.72  155.26
  10  -6  19 -177.89  158.12
  10   6 -19   54.14  155.78
 -10  -6 -18 -159.54  131.06
  10  -6  18 -225.50  132.57
  10   6 -18  -39.19  131.51
  10   6 -18  -77.67  131.89
  10   6 -17  144.99  180.81
 -10  -6 -17  301.94  138.84
  10  -6  17  292.23  211.64
 -10   6  17  280.34  262.65
  10   6 -17  192.02  117.07
  10  -6  16   29.15  202.52
 -10  -6 -16  177.57  133.05
  10   6 -16  119.83  116.51
  10   6 -16  121.36  168.86
  10   6 -15 1256.87  218.44
  10  -6  15 1026.47  239.62
  10   6 -15 1147.53  144.36
 -10  -6 -15 1273.87  173.66
 -10  -6 -14  654.11  157.04
  10   6 -14  681.14  189.66
 -10  -6 -13 1232.69  198.93
 -10  -6 -12  712.11  145.84
 -10  -6 -12  453.48   99.00
 -10  -6 -11  381.10   92.38
 -10  -6 -11  832.37  147.12
 -10  -6  -3   67.91  181.10
 -10  -6  -2 1117.76  101.79
 -10  -6  -2 1656.76  259.81
 -10  -6  -2 1378.44  112.65
  10   6  -1   99.86  120.53
 -10  -6  -1  189.53   70.17
 -10  -6  -1  628.75  198.38
 -10   6   0 1667.04  148.95
 -10  -6   0 1898.13  281.48
 -10  -6   0 1233.54  107.88
 -10  -5 -26   69.47  197.03
  10   5 -26    3.55  191.75
  10   5 -26   10.43  166.94
  10   5 -25  352.16  174.38
 -10  -5 -25  154.97  195.33
 -10  -5 -24  135.26  178.50
  10   5 -24  -83.69  234.54
  10   5 -24   63.28  145.62
  10   5 -23   58.07  223.69
 -10  -5 -23  -43.63  179.20
 -10  -5 -23   73.92  173.29
  10   5 -23  -61.53  167.85
 -10  -5 -22  -65.32  164.13
 -10  -5 -22   -7.67  163.02
  10   5 -22  -10.98  168.63
  10  -5  22  -26.69  171.22
  10   5 -22 -140.34  164.24
 -10  -5 -21  242.91  183.49
  10  -5  21   79.11  219.98
  10   5 -21  192.95  141.82
  10   5 -21  332.05  207.85
 -10  -5 -21   89.04  187.30
 -10  -5 -20   65.48  170.28
 -10  -5 -20  151.88  172.68
  10   5 -20  185.89  193.91
  10  -5  20  -44.47  204.89
  10   5 -20   41.12  119.57
 -10  -5 -20  132.82  116.51
  10   5 -19   74.57  165.01
 -10  -5 -19  190.88  163.95
  10   5 -19 -253.65  166.98
  10  -5  19   26.34  168.13
 -10   5  19 -169.72  163.57
 -10  -5 -18  201.82  118.58
 -10   5  18 -147.79  117.31
  10   5 -18  -68.98  118.60
  10  -5  18 -137.16  120.00
  10   5 -17 -216.78  178.97
 -10   5  17  390.75  176.17
  10   5 -17  120.21  178.46
  10  -5  17 -297.51  179.42
  10   5 -16  252.16  116.82
 -10   5  16   56.47  267.11
  10  -5  16   67.58  177.60
  10   5 -16  103.23  161.05
 -10  -5 -16  129.05  124.87
  10   5 -15   27.87  110.04
 -10   5  15  -24.57  215.51
 -10  -5 -15  179.15  146.88
  10   5 -15   36.55  181.81
  10  -5  15   60.93  174.73
 -10  -5 -13  311.06  117.52
 -10  -5 -13  438.39  150.68
  10   5 -12  161.18  144.47
 -10  -5 -12  193.21   99.40
 -10  -5 -12  281.29  138.42
 -10  -5 -12   89.74   98.56
  10   5 -11  914.82  174.16
 -10  -5 -11  685.53  105.03
 -10  -5 -11  960.87  172.46
 -10  -5  -3   69.95  130.54
 -10  -5  -3   61.87  130.70
 -10  -5  -3  -10.18  130.55
 -10  -5  -3 -127.39  128.83
 -10  -5  -2  110.68  182.27
 -10  -5  -2  126.50   67.60
 -10  -5  -1  157.02  194.65
 -10  -5  -1   71.73   66.15
 -10  -5  -1   62.08   61.42
 -10  -5   0  -29.61   67.85
 -10   5   0  -53.31   98.45
 -10  -5   0  133.19  124.92
 -10  -5   0  -82.74  199.76
 -10  -4 -26  167.68  190.76
  10   4 -26    8.76  156.39
  10   4 -26  128.88  172.26
  10   4 -25  -47.31  170.19
 -10  -4 -25   71.38  169.31
 -10  -4 -25   42.98  202.20
 -10  -4 -24   47.26  194.56
  10   4 -24  147.34  214.58
  10   4 -24 -107.28  154.31
  10   4 -23  376.80  205.05
  10   4 -23  284.88  155.68
 -10  -4 -23  475.74  197.92
  10   4 -22  255.82  185.09
 -10  -4 -22   60.42  185.48
 -10  -4 -22  -21.41  183.59
  10   4 -22 -163.25  190.76
  10  -4  22 -147.30  193.47
  10   4 -21  421.52  134.23
  10   4 -21  299.75  206.17
 -10  -4 -21  440.56  188.77
  10  -4  21  105.67  205.82
  10   4 -20   49.25  143.12
  10   4 -20   16.57  201.90
  10  -4  20   85.91  201.96
 -10   4  20  -29.28  264.33
 -10  -4 -20  112.96  166.30
  10   4 -19   23.21  126.77
  10   4 -19   68.14  192.43
 -10  -4 -19  269.72  168.49
 -10  -4 -19  188.40  180.84
  10  -4  19   45.94  187.34
 -10   4  19  272.35  234.59
 -10   4  18   54.61  158.92
  10   4 -18  117.48  162.12
  10  -4  18   19.20  162.71
 -10  -4 -18  108.00  159.71
 -10  -4 -18  -64.42  159.39
 -10  -4 -18    9.41  160.65
  10   4 -18 -292.16  160.29
  10   4 -17  133.49  122.11
  10   4 -17   38.15  194.25
 -10   4  17  207.08  235.46
  10  -4  17 -226.78  186.42
 -10  -4 -17  -79.13  150.25
  10   4 -16  175.11  186.77
  10  -4  16  105.49  183.64
 -10   4  16  599.00  258.80
 -10  -4 -15  212.01  141.22
  10   4 -15  704.88  189.59
  10   4 -14   45.99  170.33
 -10  -4 -14   27.09   94.93
 -10  -4 -14  -50.42  130.58
  10   4 -14   13.41  114.62
 -10  -4 -13  583.22  148.97
 -10  -4 -13  269.26  116.19
  10   4 -13  338.71  164.59
 -10  -4 -12  536.85  114.35
 -10  -4 -12  753.57  149.90
 -10  -4 -12  450.84  103.38
  10   4 -12  984.95  175.74
  10   4 -11  108.61  151.12
 -10  -4 -11  214.99   97.33
 -10  -4 -11  314.52  153.62
 -10  -4  -4  226.89  160.54
 -10  -4  -4  507.26  148.91
 -10  -4  -3  235.67  144.01
 -10  -4  -3  191.49  180.54
 -10  -4  -2  708.20  205.64
 -10  -4  -2  902.56  152.57
 -10  -4  -1  266.03  185.18
 -10  -4   0 1429.17  175.00
 -10   4   0 1257.58  154.00
 -10  -4   0 1176.28  272.38
 -10  -4   0 1003.36   85.26
 -10  -3 -26   -1.81  168.57
  10   3 -26  179.17  155.67
  10   3 -26  -14.51  171.01
  10   3 -25 -285.61  210.96
 -10  -3 -25  -84.22  202.22
 -10  -3 -25 -157.22  198.93
 -10   3  25 -284.85  201.86
  10   3 -25 -126.15  201.63
  10   3 -24   45.98  208.03
 -10  -3 -24  666.07  202.78
  10   3 -23  230.17  233.37
  10   3 -23  207.54  143.94
 -10  -3 -22  653.15  191.91
  10   3 -22  273.54  231.46
 -10  -3 -22  593.80  198.92
 -10  -3 -21  454.31  188.54
  10   3 -21  216.15  218.79
 -10   3  21  262.91  272.32
  10  -3  21  342.24  206.34
 -10  -3 -20  422.40  174.57
  10   3 -20  419.06  202.08
 -10  -3 -20  487.62  178.62
 -10   3  20  631.37  289.07
  10  -3  20  357.76  217.44
 -10   3  19  111.91  249.56
  10  -3  19   20.10  186.72
  10   3 -19  117.94  203.98
  10   3 -19   13.80  121.10
 -10  -3 -19   28.79  171.73
 -10  -3 -19   -0.39  167.74
  10   3 -18  237.11  206.79
  10   3 -18  168.82  128.24
 -10  -3 -18   83.48  169.26
  10  -3  18  605.45  175.69
 -10  -3 -18  249.14  154.96
 -10   3  18  330.64  264.24
 -10  -3 -17 -146.80  146.26
 -10   3  17  421.37  228.29
  10   3 -17  136.82  186.24
 -10  -3 -17  166.64  109.52
  10   3 -17   66.00  115.08
  10  -3  17 -131.52  195.05
  10   3 -16  726.20  129.68
 -10  -3 -16  754.64  122.27
  10   3 -16  644.27  196.72
  10  -3  16  434.37  196.34
 -10   3  16 1038.36  280.99
 -10  -3 -15  134.79  118.84
  10   3 -15  108.31  129.14
  10   3 -15   72.50  182.58
 -10  -3 -14  333.54  105.27
  10   3 -14  567.20  181.25
 -10  -3 -14  819.80  140.50
 -10  -3 -14  448.98  126.43
 -10  -3 -13  116.10  113.18
 -10  -3 -13   78.86  137.31
  10   3 -13   57.01  162.56
 -10  -3 -13  129.13  103.30
 -10  -3 -13  187.80  106.12
 -10  -3 -12  255.64  113.46
 -10  -3 -12  147.55   96.82
 -10  -3 -12  147.27  131.47
 -10  -3 -12   42.58  102.62
 -10  -3 -11  208.62  101.28
 -10  -3 -11  -21.49  121.51
 -10  -3 -11  -46.16  100.42
 -10  -3 -11  259.95  143.71
 -10  -3  -4  399.78  152.34
 -10  -3  -4   79.02  202.11
 -10  -3  -3 2897.57  209.90
 -10  -3  -3 3375.49  339.08
 -10  -3  -3 4112.10  257.51
 -10  -3  -2  301.09  148.17
 -10  -3  -2  149.07  175.96
 -10  -3   0  836.29  222.13
 -10  -3   0  874.31  156.26
 -10  -2 -26  179.86  161.92
  10   2 -26  166.47  156.99
 -10  -2 -26  133.83  215.31
  10   2 -25 -128.33  175.26
 -10  -2 -25 -154.33  172.58
  10   2 -24  179.81  156.64
  10   2 -24 -345.91  201.77
 -10   2  24  400.01  295.95
 -10  -2 -23  147.35  185.43
 -10  -2 -22  -11.15  184.10
  10   2 -22 -384.40  193.04
 -10  -2 -22    4.75  187.77
  10   2 -22 -139.88  186.10
  10   2 -21  -80.93  180.31
  10   2 -21   -4.42  174.55
 -10  -2 -21  104.91  172.92
  10  -2  21 -190.15  181.59
 -10  -2 -21  127.97  176.38
  10   2 -20  108.30  207.29
 -10  -2 -20    6.56  171.93
 -10   2  20   50.53  252.93
  10  -2  20  -86.06  184.11
 -10  -2 -19  297.53  170.99
  10   2 -19  175.00  124.52
  10  -2  19  173.99  212.05
  10   2 -19  341.01  192.55
 -10   2  18  -30.11  255.82
  10   2 -18   89.80  113.76
  10  -2  18   -4.67  180.34
 -10  -2 -18  203.59  151.77
  10   2 -17  208.58  177.86
  10  -2  17   95.10  178.71
 -10  -2 -17  348.45  162.61
  10   2 -17  239.58  124.05
 -10  -2 -17  268.88  159.41
 -10   2  17   83.17  244.70
  10   2 -16  284.01  125.03
  10   2 -16  499.42  188.87
 -10  -2 -16   73.56  101.96
  10  -2  16  110.56  184.24
 -10   2  16  553.17  236.92
 -10  -2 -16  256.47  138.58
 -10  -2 -15  -39.38  106.62
 -10  -2 -15  159.78  156.17
  10  -2  15  142.34  159.71
 -10   2  15  -46.59  282.95
  10   2 -15  -50.40  123.84
  10   2 -15  -69.54  183.31
 -10  -2 -14  769.28  127.68
  10   2 -14 1136.40  209.49
 -10  -2 -14  879.79  136.36
 -10  -2 -14  746.62  112.06
 -10  -2 -13  332.35  125.92
 -10  -2 -13   98.94  118.40
 -10  -2 -13   58.62  102.80
  10   2 -13  384.00  178.80
 -10  -2 -13  381.20  134.11
 -10  -2 -12  955.29  138.30
 -10  -2 -12  598.42  121.28
 -10  -2 -12  640.60  121.29
 -10  -2 -12  546.75  107.14
 -10  -2 -11  210.53   95.77
 -10  -2  -4 1140.94  192.51
 -10  -2  -3  -57.64  171.34
 -10  -2  -3  350.18  165.28
 -10  -2  -2  332.64  157.88
 -10  -2  -1   97.32  178.18
 -10   2   1  171.19  115.21
 -10  -2  -1  133.60  148.19
  10   2  -1  144.33  109.96
 -10  -2   0  245.04  164.63
 -10  -2   0  431.25  206.31
 -10   2   0  278.06  179.43
  10   1 -26  -12.78  165.13
 -10  -1 -26   91.53  161.77
 -10  -1 -26  254.53  223.02
  10   1 -25   10.60  192.46
  10   1 -25  141.05  154.60
 -10  -1 -25  -94.56  170.87
 -10  -1 -24  241.26  172.40
  10   1 -24  181.73  158.35
 -10  -1 -23  113.28  201.24
  10   1 -23   70.20  199.80
  10   1 -23   14.50  141.11
  10   1 -22 -102.32  210.37
  10   1 -22   27.70  202.33
  10  -1  21  -47.35  171.50
  10   1 -21   11.01  121.42
 -10  -1 -21  148.96  184.82
  10   1 -21   61.22  206.06
  10   1 -20  -69.89  193.10
  10   1 -20 -145.03  187.29
 -10  -1 -20   62.92  185.50
  10  -1  20 -202.79  193.48
 -10  -1 -20  236.69  190.43
  10   1 -19   53.54  190.14
  10   1 -19 -139.20  185.17
 -10   1  19  492.43  184.82
  10  -1  19  -50.60  190.08
  10  -1  18   21.57  172.61
  10   1 -18   27.75  172.92
 -10  -1 -18 -111.30  172.53
 -10  -1 -18  -97.38  167.93
 -10   1  18  356.89  168.57
  10   1 -18  -56.95  169.10
  10   1 -17  182.86  125.90
 -10   1  17  229.52  247.05
 -10  -1 -17  312.01  154.84
  10   1 -17 -101.80  165.58
 -10  -1 -17   -2.14   96.50
  10  -1  17  164.24  167.54
  10   1 -16  356.27  195.02
  10   1 -16  341.59  127.51
 -10  -1 -16  396.27  106.08
 -10   1  16  930.74  277.42
  10  -1  16  407.91  168.16
  10  -1  15 1341.34  212.61
  10   1 -15 1477.38  218.69
 -10  -1 -15 1229.23  130.98
  10   1 -15 1355.45  152.11
 -10  -1 -15 1833.91  213.77
  10   1 -14  970.10  210.00
  10   1 -14 1115.41  138.19
 -10  -1 -14  619.70  131.68
 -10  -1 -14 1228.88  187.96
 -10  -1 -14  958.33  123.97
 -10  -1 -13 1251.11  128.94
 -10  -1 -13 1644.54  153.60
  10   1 -13 2440.13  277.16
 -10  -1 -13 1836.71  169.72
  10   1 -13 1816.26  227.43
 -10  -1 -12  360.40   84.79
 -10  -1 -12  456.71  128.60
 -10  -1 -12  204.77  114.35
 -10  -1 -12  471.11  115.20
 -10  -1  -6  283.14  153.59
  10   1  -3 1447.16  176.38
 -10  -1  -3 1687.80  221.85
  10   1  -2   57.05   97.18
  10  -1   2  -18.77  125.45
 -10  -1  -2  108.21  188.17
 -10  -1  -2  202.66  164.60
  10   1  -2   45.57  119.72
 -10   1   2   29.70  109.17
 -10   1   2  -30.89   91.96
 -10   1   2   63.49  165.94
 -10  -1  -1  491.65  201.17
  10  -1   1  568.40  147.74
  10   1  -1  704.30  131.37
 -10   1   1  422.91  172.76
 -10  -1  -1  811.28  181.95
  10  -1   1  619.25  132.50
 -10  -1   0 1003.23  210.57
 -10   1   0 1114.44  189.65
 -10  -1   0  895.58  185.40
 -10   1   0  951.68  240.51
 -10   0 -26 -108.19  168.05
  10   0 -26 -180.91  167.69
  10   0 -25  -74.47  193.70
 -10   0 -25   17.82  194.74
  10   0 -25  -60.80  204.13
  10   0 -24  222.41  150.28
  10   0 -24  -73.88  192.04
 -10   0 -24  148.13  162.41
  10   0 -23 -309.28  191.74
 -10   0 -23  -19.72  185.53
  10   0 -23  101.01  183.33
  10   0 -22  -33.55  252.93
  10   0 -22 -151.68  263.44
  10   0 -21  257.87  137.61
  10   0 -21  -19.19  201.23
 -10   0 -21  213.11  182.67
 -10   0 -20   29.13  158.03
  10   0 -20  203.98  183.67
 -10   0 -19  479.65  178.26
  10   0 -19  547.04  195.68
  10   0 -19  418.09  140.75
  10   0 -18    7.66  162.18
 -10   0 -18 -124.61  166.64
  10   0 -17  485.32  172.39
 -10   0 -17  575.88  188.14
 -10   0 -17  509.03  161.14
  10   0 -16   26.30  122.73
  10   0 -16   53.30  172.07
 -10   0 -15  205.67   92.91
 -10   0 -15  723.47  153.87
  10   0 -15  292.56  172.48
  10   0 -15  465.09  135.25
 -10   0 -15  562.06  164.87
  10   0 -14 -186.48  158.91
 -10   0 -14   92.07  159.80
 -10   0 -14   83.31  158.11
  10   0 -14 -181.45  160.67
 -10   0 -14   27.86  160.91
  10   0 -13   18.49  140.39
 -10   0 -13  171.38  165.57
 -10   0 -13  327.44  134.93
 -10   0 -13  -61.25   98.67
 -10   0 -12   27.68  160.25
  10   0 -12  -78.25  156.05
 -10   0 -12   52.12  157.67
  10   0 -12  -44.96  155.25
 -10   0 -12  -48.61  155.78
 -10   0 -12  110.68  154.44
 -10   0 -11  -36.30  153.81
  10   0 -11   96.60  149.20
  10   0 -11  308.05  183.44
  10   0 -11   11.92  114.21
 -10   0 -11  -92.25  125.34
  10   0 -10  153.19   98.41
 -10   0 -10  216.16   87.03
 -10   0 -10  163.83   68.42
 -10   0 -10  191.44  122.73
 -10   0 -10  169.15  118.77
  10   0 -10  356.86  150.61
  10   0 -10  261.61  209.16
  10   0  -9  367.32  174.08
 -10   0  -9  178.96  130.04
 -10   0  -9  276.98  122.67
  10   0  -9  266.59   81.13
 -10   0  -9  223.19   71.65
  10   0  -9  335.99  133.90
 -10   0  -8  692.06  146.36
 -10   0  -8  860.57   76.25
  10   0  -8  808.60   85.77
  10   0  -8  886.76  143.39
  10   0  -8  938.95  205.85
 -10   0  -8 1100.23  178.46
 -10   0  -7 1357.07  178.21
 -10   0  -7  777.93  149.21
  10   0  -7 1208.68   87.17
  10   0  -7 1428.09  222.32
  10   0  -7 1505.27  172.72
  10   0  -6 1353.98  213.61
 -10   0  -6 1600.40  162.95
  10   0  -6 1171.59  165.71
  10   0  -5  496.58  128.62
 -10   0  -5  289.19  169.06
  10   0  -5  435.92  163.72
  10   0  -4 1241.18  183.89
  10   0  -4 1318.28  167.73
 -10   0  -4 1137.83  189.39
 -10   0  -3    7.44  170.60
  10   0  -3    4.13  129.34
 -10   0  -2  700.99  189.88
 -10   0  -2  863.08  186.56
  10   0  -2  429.10  151.01
  10   0  -1 3816.15  256.17
 -10   0  -1 4445.28  308.04
  10   0  -1 3976.56  290.82
 -10   0  -1 4432.99  383.83
 -10   0   0 1685.09  255.62
 -10   0   0 1545.16  210.80
   9 -27   5  261.84  186.91
   9  27  -5  245.25  160.62
   9  27  -5  147.78  178.23
  -9 -27  -5  278.54  294.73
  -9  27   5  515.72  194.11
   9 -27   5  308.76  255.97
   9  27  -5  157.02  173.95
   9  27  -4  265.65  175.23
   9  27  -4  492.61  174.84
  -9  27   4  708.95  226.38
   9 -27   4  248.63  235.44
  -9 -27  -4  411.87  321.95
   9  27  -4  312.22  174.29
   9 -27   4  440.82  238.94
  -9  27   3  610.01  214.95
   9 -27   3  397.64  206.93
   9  27  -3  585.05  187.31
  -9 -27  -3  546.50  281.90
   9 -27   3  709.83  272.07
   9  27  -3  463.09  175.33
   9  27  -2  353.14  167.13
   9 -27   2  123.92  216.22
  -9  27   2  201.03  210.75
  -9 -27  -2 -164.57  233.94
   9  27  -2  383.38  192.42
   9 -27   2  370.35  264.58
  -9  27   1   97.84  216.96
   9  27  -1  190.37  210.61
   9 -27   1  135.30  243.26
  -9 -27  -1   69.22  205.13
  -9  27   0   60.86  226.09
  -9 -27   0  214.21  303.25
  -9  27   0  322.81  166.47
   9  26  -9   10.45  198.36
   9 -26   9  -64.58  198.51
   9  26  -9  100.65  197.33
   9  26  -9    9.92  214.29
  -9 -26  -9 -124.16  200.13
   9  26  -8  -47.26  190.11
   9 -26   8  151.87  241.76
   9  26  -8  -18.66  181.53
  -9 -26  -8  -21.81  214.78
   9  26  -8  113.33  154.61
   9 -26   7   38.00  171.19
   9  26  -7  145.53  199.00
  -9 -26  -7  131.28  235.00
   9 -26   7 -180.29  234.35
  -9  26   7   95.65  180.23
   9  26  -7  -69.59  158.62
   9  26  -7  -90.65  152.21
   9 -26   6  -43.09  261.02
   9 -26   6  178.44  269.88
   9  26  -6 -190.08  259.46
   9  26  -6 -170.71  258.79
  -9 -26  -6 -321.74  261.00
   9  26  -6  -25.33  278.34
  -9  26   6  132.39  257.77
   9  26  -5   92.87  151.57
   9  26  -5  115.22  167.44
   9  26  -5   27.38  171.87
   9 -26   5  -10.89  213.71
   9 -26   5  -32.40  179.01
  -9  26   5   73.00  203.29
  -9 -26  -5 -133.14  334.05
   9 -26   4  -56.05  268.63
   9  26  -4 -322.61  273.07
   9 -26   4   42.29  258.22
   9  26  -4    2.80  256.31
  -9 -26  -4  -58.85  257.01
  -9  26   4  157.85  254.44
   9  26  -3 -251.97  267.69
   9 -26   3 -100.26  254.15
  -9 -26  -3   73.95  252.57
   9 -26   3  -97.58  265.03
  -9  26   3   30.86  250.42
   9  26  -3 -105.55  252.27
  -9  26   2  -36.28  289.41
   9 -26   2  -68.67  306.77
   9  26  -2   81.60  291.49
   9 -26   2    5.22  293.61
  -9 -26  -2 -161.21  291.46
   9  26  -2  -33.78  308.29
   9 -26   1 -241.04  279.37
   9  26  -1  -56.33  279.45
  -9 -26  -1  -22.53  264.94
  -9  26   1 -162.96  263.44
  -9  26   0  231.33  206.20
  -9 -26   0   35.76  287.58
  -9  26   0  183.87  172.79
   9  25 -11   35.59  148.47
   9  25 -11   96.60  183.24
   9  25 -11  129.99  191.62
  -9 -25 -11   64.71  241.73
   9  25 -10  124.90  179.06
   9  25 -10   90.48  161.95
   9 -25  10 -144.06  222.39
   9  25 -10 -130.14  191.45
  -9 -25 -10  294.81  241.78
   9  25  -9  187.36  154.60
   9  25  -9   26.50  199.16
  -9 -25  -9  373.31  240.65
   9 -25   9  479.76  267.82
   9  25  -9   63.06  174.01
   9  25  -8  -97.77  257.96
  -9 -25  -8 -201.10  240.86
   9 -25   8  -88.62  244.55
   9  25  -8  175.17  238.91
   9  25  -8   28.78  237.64
   9  25  -7  240.58  166.93
  -9 -25  -7   30.35  249.70
   9 -25   7  112.16  162.55
   9  25  -7  178.60  198.87
   9  25  -7  228.89  163.76
   9 -25   7  -54.81  235.64
   9  25  -6  210.71  169.06
   9  25  -6 -128.39  170.66
   9 -25   6   10.67  185.31
  -9 -25  -6   24.96  246.30
   9 -25   6  388.72  233.98
   9  25  -6 -136.95  152.62
  -9 -25  -5  413.17  272.78
   9 -25   5  423.03  179.09
  -9  25   5  392.49  199.89
   9  25  -5  489.34  171.10
   9  25  -5  227.93  162.91
   9 -25   5  317.49  247.39
   9  25  -5  -83.75  178.36
  -9 -25  -4  362.33  255.61
   9  25  -4  677.23  174.05
   9  25  -4  318.95  168.12
   9 -25   4  119.52  232.60
  -9  25   4  488.53  188.57
   9  25  -4   69.88  174.87
   9 -25   3  319.19  218.32
  -9  25   3  442.53  184.58
   9  25  -3  455.53  165.11
  -9 -25  -3  593.77  274.35
   9  25  -3  350.51  201.92
   9 -25   2  -16.14  212.88
  -9  25   2  123.00  221.01
  -9 -25  -2  174.03  287.15
   9  25  -2  378.68  169.22
  -9 -25  -1  320.17  274.35
   9 -25   1  285.30  219.70
  -9  25   1  360.99  201.20
   9  25  -1  732.27  186.55
  -9  25   0  193.12  186.06
  -9  25   0   39.53  198.81
  -9 -25   0  -43.49  255.49
   9 -24  13  260.55  269.42
   9  24 -13  286.47  190.44
   9  24 -13  355.67  199.87
  -9 -24 -13   16.14  218.36
   9 -24  12 -180.37  299.24
  -9 -24 -12  153.43  231.00
   9  24 -12  149.00  168.63
  -9 -24 -11  140.71  230.37
   9  24 -11  275.96  140.19
   9  24 -11  483.19  196.52
   9 -24  11  774.28  279.76
   9  24 -11  309.93  215.09
   9  24 -10  216.65  193.79
   9  24 -10   59.90  142.63
   9  24 -10  347.75  190.61
   9 -24  10  257.78  250.41
  -9 -24 -10  264.18  224.27
  -9 -24  -9  382.04  230.53
   9  24  -9  273.84  175.17
   9  24  -9  170.36  206.23
   9 -24   9   78.28  178.68
   9  24  -9 -124.55  150.95
   9 -24   9  188.79  264.45
   9  24  -8  532.31  169.08
  -9 -24  -8  608.14  292.11
   9 -24   8  636.47  260.76
   9  24  -8  600.76  190.47
   9  24  -8  877.81  215.43
   9  24  -7  309.23  170.97
   9  24  -7  152.87  147.62
   9  24  -7  272.07  176.73
   9 -24   7  219.04  255.60
  -9 -24  -7  557.15  280.42
   9 -24   6  510.55  206.00
   9  24  -6  440.69  172.43
  -9 -24  -6 1159.53  289.93
   9  24  -6  554.87  168.43
   9  24  -6  621.19  193.32
   9 -24   6  736.88  259.01
   9 -24   5   69.92  224.28
   9  24  -5 -100.54  160.83
  -9 -24  -5  479.78  250.54
   9 -24   5  -77.20  202.40
   9  24  -5   41.55  178.45
   9 -24   4  292.01  194.17
  -9 -24  -4   55.45  268.00
   9 -24   4  730.36  242.78
   9  24  -4  325.97  172.20
   9  24  -4  236.58  171.84
   9 -24   3   39.95  199.41
   9  24  -3  164.95  158.95
  -9  24   3  413.68  200.10
   9  24  -3  544.00  169.47
  -9 -24  -3  737.36  280.99
   9  24  -2  285.38  176.80
   9 -24   2  302.09  202.18
  -9  24   2  380.35  206.63
  -9 -24  -2  239.70  260.14
  -9 -24  -1  365.27  241.95
  -9  24   1  828.46  279.04
   9 -24   1  315.86  203.06
   9  24  -1  298.29  188.07
  -9  24   0  -89.25  177.89
  -9  24   0   56.35  191.14
  -9 -24   0  124.79  249.44
   9  23 -15 -314.12  202.22
  -9 -23 -15   -2.26  202.82
   9 -23  15  219.36  199.17
   9  23 -15  -74.98  201.56
  -9 -23 -14  -43.62  237.77
   9 -23  14 -143.06  233.38
   9  23 -14   73.67  236.46
   9  23 -14  -14.03  235.41
   9 -23  13  155.50  280.31
   9  23 -13  200.65  205.08
  -9 -23 -13  -56.73  233.01
   9  23 -13   11.45  167.39
   9  23 -12  -34.53  183.48
   9 -23  12  134.87  275.29
   9  23 -12  232.01  155.15
  -9 -23 -12  -70.62  200.97
   9  23 -12   92.27  148.88
   9 -23  11   -4.16  223.45
  -9 -23 -11  -12.29  226.98
   9  23 -11 -139.90  243.93
   9  23 -11    5.16  223.19
   9  23 -10   64.15  217.32
   9  23 -10  -93.81  200.43
   9  23 -10  -39.31  198.92
  -9 -23 -10  -91.64  202.36
   9 -23  10 -176.63  199.66
   9 -23   9 -148.79  161.38
   9  23  -9   98.95  190.93
  -9 -23  -9  -24.55  266.98
   9 -23   9   17.04  241.80
   9  23  -9  337.69  206.24
   9  23  -9 -108.74  156.43
   9  23  -8   17.79  158.29
   9  23  -8   79.18  181.82
   9  23  -8   88.56  204.29
   9 -23   8   14.82  245.87
  -9 -23  -8  159.60  240.96
   9  23  -7 -164.46  273.51
   9  23  -7  -49.48  253.85
   9  23  -7 -121.34  252.28
  -9 -23  -7 -511.04  255.34
   9 -23   7 -152.63  254.13
   9  23  -6  177.52  163.08
   9 -23   6  281.31  236.54
   9  23  -6   31.88  156.52
   9  23  -6   93.99  180.19
  -9 -23  -6   42.78  230.94
   9 -23   6   98.60  183.43
  -9 -23  -5  148.43  228.64
   9  23  -5   -3.61  170.56
   9  23  -5  169.71  164.83
   9 -23   5 -163.57  173.27
   9 -23   5   38.54  225.95
   9 -23   4   61.62  204.98
  -9 -23  -4  178.82  245.83
   9 -23   4   -2.34  200.12
   9  23  -4  100.35  162.15
   9  23  -4   43.63  159.13
   9 -23   3  220.41  198.74
   9  23  -3   55.77  162.38
  -9 -23  -3  263.53  263.98
  -9  23   2   23.49  168.79
  -9 -23  -2   80.70  214.65
   9 -23   2  -46.12  193.48
   9  23  -2  -31.27  163.08
  -9 -23  -1   44.20  242.29
   9  23  -1  218.00  181.87
   9 -23   1   58.41  215.14
  -9 -23   0  250.65  238.39
  -9  23   0  184.92  194.75
  -9  23   0  104.68  184.07
   9 -22  16   44.77  203.20
   9  22 -16 -229.46  206.59
   9  22 -16   72.76  206.38
  -9 -22 -16 -207.40  206.60
   9 -22  15   90.08  262.18
   9  22 -15   22.89  204.07
   9  22 -15  141.72  180.19
  -9 -22 -15   12.01  195.26
   9  22 -14 -145.94  205.68
  -9 -22 -14   90.15  207.65
   9 -22  14   31.26  203.80
   9  22 -14   92.57  206.47
   9  22 -13  177.38  181.89
  -9 -22 -13   39.12  220.17
   9  22 -13  244.73  202.20
   9 -22  13  114.96  263.28
  -9 -22 -12  257.48  199.34
   9  22 -12 -107.22  131.74
   9  22 -12   54.58  165.22
   9 -22  12  141.13  263.07
   9  22 -12  164.44  204.44
   9 -22  11   38.21  267.37
   9  22 -11  103.32  183.19
  -9 -22 -11   75.14  240.16
   9  22 -11  177.27  200.69
   9  22 -11   36.12  139.24
   9  22 -10  181.03  201.26
   9 -22  10   93.65  253.85
   9 -22  10    8.50  177.20
   9  22 -10   26.83  178.92
   9  22 -10   47.75  146.07
  -9 -22 -10  170.39  245.68
   9 -22   9 -332.56  247.78
  -9 -22  -9    9.68  250.61
   9  22  -9  -95.35  268.46
   9 -22   9 -115.36  249.62
   9  22  -9   32.12  246.42
   9  22  -9 -143.01  248.43
   9  22  -8   -8.24  166.54
   9  22  -8  124.84  190.89
   9 -22   8  100.16  252.71
   9 -22   8  -68.55  191.46
   9  22  -8   67.71  143.15
  -9 -22  -8   18.33  243.15
   9  22  -7 -151.31  253.59
  -9 -22  -7   44.81  256.70
   9  22  -7  -36.19  274.62
   9 -22   7   93.83  255.36
   9  22  -7   -5.55  255.36
   9 -22   7  -50.58  258.19
   9  22  -6  256.61  158.10
   9 -22   6  383.43  237.35
  -9 -22  -6  455.98  239.19
   9  22  -6  429.76  198.36
   9 -22   6  296.33  174.23
   9  22  -6  235.20  160.88
   9  22  -5   68.68  183.93
  -9 -22  -5  300.98  246.28
   9 -22   5  376.13  238.07
   9  22  -5    7.18  153.81
  -9 -22  -4  446.22  252.41
  -9  22   4  469.04  166.99
   9  22  -4  209.71  151.86
   9 -22   4   91.41  197.20
  -9 -22  -3  156.42  235.98
   9 -22   3  360.75  209.88
   9  22  -3  132.91  158.67
  -9  22   3  163.28  190.53
   9  22  -2  361.77  184.39
  -9 -22  -2  593.67  260.02
  -9  22   2  381.32  208.92
   9 -22   2  231.45  201.93
  -9 -22  -1  139.83  238.37
   9 -22   1   53.87  188.24
  -9  22   1  327.03  191.05
   9  22  -1  146.93  170.13
  -9 -22   0   -3.43  242.16
  -9  22   0  262.99  207.74
  -9  22   0  191.49  186.30
   9  21 -18 -119.89  153.48
   9 -21  18    3.66  150.39
   9 -21  17   23.36  207.64
   9  21 -17 -211.01  211.22
  -9 -21 -17 -304.93  210.53
   9  21 -17   17.14  211.54
   9 -21  16 -171.28  211.23
   9  21 -16  -56.42  214.64
   9  21 -16  105.64  214.68
  -9 -21 -16  116.91  214.64
   9  21 -15  -44.56  198.78
   9 -21  15  -20.02  195.89
   9  21 -15   36.75  198.50
  -9 -21 -14  134.80  213.12
   9  21 -14  188.83  177.72
   9  21 -14   55.71  203.13
   9 -21  14 -141.05  259.57
   9  21 -13  279.07  187.88
   9  21 -13  580.75  203.10
  -9 -21 -13  285.82  219.87
   9 -21  13  423.09  313.91
   9  21 -12  -59.92  140.03
   9  21 -12  213.99  194.86
   9 -21  12  -21.88  270.00
  -9 -21 -12  -25.43  210.94
   9  21 -12  192.64  177.51
   9 -21  11   -8.88  267.52
   9  21 -11  134.95  182.06
   9  21 -11  111.74  163.85
  -9 -21 -11  129.51  215.52
   9 -21  10  561.43  279.58
   9  21 -10  684.48  200.00
  -9 -21 -10  520.68  205.16
   9  21 -10  643.34  159.08
   9  21 -10  398.95  156.72
   9  21  -9   54.80  161.23
   9  21  -9  124.41  153.78
   9  21  -9  167.26  204.18
   9 -21   9  123.53  178.54
  -9 -21  -9 -119.14  250.38
   9  21  -8  860.32  180.08
   9 -21   8  399.01  182.63
   9  21  -8  610.64  158.53
  -9 -21  -8  440.05  254.49
   9 -21   8  813.92  259.63
   9  21  -8  926.61  208.88
  -9 -21  -7  141.40  228.59
   9  21  -7  125.89  225.80
   9  21  -7 -129.32  243.95
   9 -21   7 -234.44  228.96
   9 -21   7   78.32  227.33
   9  21  -7 -155.05  227.56
   9  21  -6  724.31  151.48
   9  21  -6  503.60  202.82
  -9 -21  -6  509.73  233.13
   9  21  -6  610.75  154.67
   9 -21   6  459.30  187.59
   9 -21   6  466.37  250.63
   9  21  -5  343.91  165.56
  -9 -21  -5  496.49  242.11
   9  21  -5  115.19  146.55
   9  21  -4  217.21  158.38
  -9 -21  -4  756.11  247.96
  -9 -21  -3 1048.97  283.95
  -9  21   3 1252.47  216.40
   9  21  -3  650.53  178.44
   9 -21   3  875.27  215.75
   9 -21   2  -87.67  207.16
  -9 -21  -2  929.93  267.31
  -9  21   2  639.43  212.98
   9  21  -2  139.56  172.77
  -9  21   1 2672.31  303.11
   9  21  -1 2005.12  244.18
   9 -21   1 2095.07  279.89
  -9 -21  -1 2101.62  336.18
  -9  21   0 1115.64  215.49
  -9  21   0  760.57  228.80
  -9 -21   0 1125.15  288.56
   9 -20  19 -199.51  193.21
  -9 -20 -19   98.02  196.85
   9  20 -19   -7.53  197.34
  -9 -20 -19  -70.86  194.39
   9  20 -19  113.00  196.44
   9  20 -18   14.94  151.80
  -9 -20 -18  118.65  177.16
  -9 -20 -18    3.38  172.62
   9 -20  18   12.23  281.04
  -9 -20 -17 -168.92  197.69
   9  20 -17 -237.23  198.41
   9 -20  17  220.70  195.21
   9  20 -17  -48.92  198.97
   9  20 -16   40.93  171.58
   9  20 -16   68.89  202.87
   9 -20  16   78.58  257.25
  -9 -20 -16 -119.00  222.80
  -9 -20 -15  268.29  190.44
   9 -20  15  158.25  261.51
   9  20 -15 -161.46  176.32
   9  20 -15  298.63  191.99
  -9 -20 -14  211.26  191.46
   9  20 -14  -66.16  182.32
   9  20 -14   48.36  155.36
   9 -20  14   -5.82  248.23
  -9 -20 -13    8.45  196.19
   9  20 -13   20.35  193.90
   9 -20  13 -307.46  192.58
   9  20 -13 -157.11  207.88
   9  20 -13 -218.50  194.68
   9  20 -12 -190.34  206.46
   9 -20  12  -38.02  205.80
   9  20 -12   61.02  207.67
  -9 -20 -12 -205.14  209.56
   9 -20  11 -132.88  194.60
  -9 -20 -11  148.82  197.90
   9 -20  11  -94.47  195.37
   9  20 -11   73.96  194.56
   9  20 -10   -8.53  144.49
   9  20 -10  264.17  156.20
  -9 -20 -10  148.29  229.11
   9  20 -10  296.17  186.61
   9 -20  10   34.05  263.64
   9  20  -9  178.71  142.15
   9  20  -9  377.90  155.78
   9  20  -9  277.20  175.83
   9 -20   9  200.81  236.67
  -9 -20  -9  257.89  193.34
   9  20  -8  548.43  182.42
  -9 -20  -8  164.10  219.72
   9  20  -8  192.36  148.85
   9 -20   8  132.62  171.58
   9 -20   8  234.20  239.16
   9  20  -8  157.45  152.79
   9  20  -7   35.27  153.67
  -9 -20  -7  222.99  237.83
   9  20  -7  424.40  150.02
   9  20  -7   71.85  175.75
   9 -20   7  232.99  248.16
   9  20  -6  130.83  146.42
   9  20  -6  289.92  152.49
   9 -20   6  279.00  211.34
  -9 -20  -6  209.18  228.85
   9 -20   6   34.09  181.33
   9  20  -5  636.05  154.60
  -9 -20  -5  634.97  249.14
   9  20  -5  701.80  192.00
   9 -20   4 -322.81  189.49
  -9 -20  -4  640.19  255.48
   9  20  -4  109.31  151.59
   9  20  -3  820.94  169.74
  -9 -20  -3 1145.39  236.57
   9 -20   3  842.82  203.58
   9  20  -2   57.92  223.78
  -9 -20  -2   45.19  211.01
   9 -20   2 -183.61  215.14
  -9  20   2   53.24  210.68
  -9  20   1  338.21  189.93
  -9 -20  -1  382.53  194.34
   9 -20   1  122.04  189.08
   9  20  -1   31.13  149.37
  -9 -20   0 -126.68  158.06
  -9  20   0   31.50  158.65
  -9  20   0  155.98  158.41
   9  19 -20  -87.41  181.55
   9 -19  20 -365.67  178.95
   9  19 -20   28.33  182.61
  -9 -19 -20  -25.29  181.96
   9 -19  19 -108.45  169.40
   9  19 -19   14.68  172.97
   9  19 -19   88.68  171.99
  -9 -19 -19  -49.56  172.48
  -9 -19 -18  263.54  169.89
   9 -19  18  108.72  262.18
   9  19 -18 -183.82  211.83
   9  19 -18  113.65  176.82
  -9 -19 -18   40.67  174.40
   9  19 -17  270.29  208.81
  -9 -19 -17  167.10  174.67
  -9 -19 -17 -114.62  203.23
   9  19 -17  137.90  164.79
   9 -19  17  120.65  255.61
   9  19 -16  -75.14  166.71
  -9 -19 -16   72.02  174.57
  -9 -19 -16  140.27  209.99
   9 -19  16   33.13  258.12
   9  19 -16  107.47  183.72
   9  19 -15   88.93  182.27
   9  19 -15 -171.36  182.49
  -9 -19 -15    0.88  182.82
   9 -19  15  325.83  179.83
  -9 -19 -14   20.90  197.29
   9 -19  14    5.22  257.89
   9  19 -14   88.38  169.49
   9  19 -14   32.69  148.76
  -9 -19 -13  -27.41  193.31
   9  19 -13 -132.78  191.24
   9  19 -13  -72.43  191.82
   9 -19  13 -332.30  189.79
   9  19 -12  333.20  185.25
   9  19 -12  118.04  157.24
  -9 -19 -12  141.90  214.48
   9 -19  12  177.02  245.20
   9  19 -11  -31.04  141.77
   9 -19  11  -75.58  257.06
  -9 -19 -11  122.97  193.80
   9  19 -11   51.59  145.66
   9  19 -11  -52.02  175.21
  -9 -19 -10  -97.86  236.76
   9  19 -10   73.01  234.65
   9 -19  10 -177.44  233.26
   9  19 -10  -85.99  249.43
   9  19 -10  103.70  232.63
  -9 -19  -9  159.62  213.72
   9 -19   9  192.83  248.73
   9  19  -9   54.52  124.69
   9  19  -9   81.02  163.93
   9  19  -9  150.68  139.53
   9  19  -8  166.59  217.11
   9  19  -8 -179.35  204.60
  -9 -19  -8  143.89  205.74
   9 -19   8   32.50  203.86
   9 -19   8  -76.61  204.26
   9  19  -8 -146.78  202.61
   9  19  -7  375.13  162.56
  -9 -19  -7  131.75  248.74
   9 -19   7  356.41  197.46
  -9 -19  -6  221.00  219.64
   9  19  -6   22.28  135.95
   9  19  -6  204.76  153.44
   9 -19   5  -98.32  192.38
   9  19  -5   91.66  164.59
   9  19  -5  219.15  143.59
  -9 -19  -5  274.35  232.87
   9 -19   4  -60.32  260.15
   9  19  -4  115.15  272.71
  -9 -19  -4 -125.33  257.95
  -9 -19  -3  598.25  258.45
   9 -19   3  569.70  209.08
   9  19  -3  682.82  149.42
   9 -19   2  266.45  179.63
  -9  19   2  448.71  175.23
   9  19  -2  259.29  155.82
  -9 -19  -2  496.47  225.53
  -9  19   1  811.87  181.62
  -9 -19  -1  697.32  253.02
   9  19  -1  765.16  169.07
   9 -19   1  575.96  204.01
  -9  19   0  724.85  226.53
  -9 -19   0  467.74  235.41
  -9  19   0  840.25  176.55
   9 -18  21 -363.65  189.14
  -9 -18 -21  175.34  188.16
  -9 -18 -21  -38.33  191.55
   9  18 -21  206.19  192.47
   9  18 -21  -42.48  191.31
  -9 -18 -20  186.85  210.97
  -9 -18 -20 -168.69  169.89
   9 -18  20   14.73  296.08
   9  18 -20   11.54  205.19
   9  18 -20  132.19  176.62
   9 -18  19 -139.12  261.45
   9  18 -19  129.85  216.61
   9  18 -19   49.37  163.80
  -9 -18 -19  -86.60  178.30
  -9 -18 -19  103.50  174.66
   9  18 -18    5.86  169.03
   9 -18  18   69.86  298.89
   9  18 -18   54.45  182.24
  -9 -18 -18  209.39  187.81
  -9 -18 -18  250.56  185.63
   9  18 -17  -16.94  200.75
   9 -18  17   82.15  260.97
   9  18 -17  -40.83  173.17
  -9 -18 -17  228.37  193.49
  -9 -18 -17   11.04  167.71
   9  18 -16  105.07  174.63
  -9 -18 -16  -30.19  174.57
  -9 -18 -16 -373.07  175.31
   9  18 -16   92.64  175.41
   9 -18  16  174.43  172.29
   9  18 -15    0.48  187.07
  -9 -18 -15  268.16  205.98
   9  18 -15  -96.09  151.26
   9 -18  15  -82.15  260.02
   9 -18  14    2.83  274.37
   9  18 -14   66.62  149.91
   9  18 -14  136.72  185.10
  -9 -18 -14  -32.76  168.99
   9  18 -13  157.44  168.31
   9  18 -13   60.47  115.74
   9  18 -13    5.80  149.02
   9 -18  13   -0.97  244.01
   9  18 -12  -63.08  127.94
   9 -18  12  300.75  255.92
  -9 -18 -12   10.68  200.05
   9  18 -12  173.65  172.38
   9  18 -12  232.95  141.97
  -9 -18 -11  158.51  203.40
   9  18 -11   26.60  146.55
   9 -18  11  157.88  251.34
   9  18 -11  -23.12  140.99
   9  18 -11  156.71  165.92
   9 -18  10  440.85  258.09
  -9 -18 -10  761.89  217.42
   9  18 -10  510.48  143.20
   9 -18  10  723.78  144.84
   9  18 -10  934.77  195.05
   9  18 -10  529.08  154.63
   9  18  -9  440.04  137.12
  -9 -18  -9  249.18  225.57
   9 -18   9  416.04  154.17
   9  18  -9   16.97  138.69
   9 -18   9  170.88  207.47
   9  18  -9  407.63  169.77
  -9 -18  -8 1011.59  232.54
   9  18  -8  744.08  186.16
   9  18  -8  697.00  157.06
   9  18  -8  770.44  150.64
   9 -18   8  837.69  250.53
  -9 -18  -7  613.76  223.20
   9  18  -7  433.09  148.70
   9  18  -7  791.11  151.08
   9  18  -7  948.93  187.10
   9 -18   7  596.63  173.68
   9 -18   6  206.32  176.47
  -9 -18  -6  250.23  226.44
   9  18  -6  344.55  176.55
   9  18  -6   22.41  142.67
   9 -18   5  799.11  197.73
  -9 -18  -5 1046.35  223.66
   9  18  -4  865.44  182.39
  -9 -18  -4  619.21  258.90
   9 -18   4  924.16  206.98
   9 -18   3  476.65  201.09
  -9 -18  -3  759.37  258.95
  -9  18   3  924.99  208.15
   9  18  -3  359.51  158.16
  -9  18   2 1899.05  274.69
  -9 -18  -2 1805.61  316.17
   9  18  -2 1778.21  217.35
   9 -18   2 1829.02  266.87
  -9  18   1  322.52  216.17
  -9 -18  -1 1183.95  250.12
   9 -18   1  147.70  192.56
   9  18  -1  201.71  164.17
  -9 -18   0 2267.85  340.30
  -9  18   0 2904.40  319.73
  -9  18   0 2948.05  277.02
  -9 -17 -22  156.18  197.84
   9 -17  22  -44.09  274.77
   9  17 -22  -37.18  168.03
   9  17 -22   73.25  205.32
   9 -17  21  226.55  299.06
   9  17 -21  -54.01  184.41
  -9 -17 -21  -61.43  209.61
   9  17 -21   21.79  217.06
  -9 -17 -21  198.66  185.07
  -9 -17 -20  -34.08  207.51
   9  17 -20  -59.79  211.95
   9  17 -20  144.06  210.45
   9 -17  20    5.21  208.19
  -9 -17 -20 -114.16  211.14
   9  17 -19 -102.89  181.79
   9  17 -19  143.24  180.41
  -9 -17 -19   50.26  181.25
  -9 -17 -19 -104.70  178.41
   9 -17  19    6.49  178.27
   9 -17  18 -305.70  184.72
   9  17 -18   -3.69  187.01
   9  17 -18   89.13  188.46
  -9 -17 -18 -201.02  188.04
  -9 -17 -18  144.08  185.61
  -9 -17 -17  183.88  163.65
   9  17 -17   90.41  158.23
   9  17 -17   97.27  192.65
   9 -17  17 -146.22  241.28
  -9 -17 -17   30.53  197.46
   9  17 -16 -219.11  177.33
  -9 -17 -16   72.26  178.28
   9  17 -16 -119.22  178.39
   9 -17  16  198.08  175.13
  -9 -17 -16   -1.80  177.23
   9  17 -15  180.57  151.85
   9 -17  15    6.21  233.86
  -9 -17 -15  195.77  193.11
   9  17 -15  -10.18  169.26
  -9 -17 -14  307.81  176.28
   9  17 -14  134.98  175.32
   9  17 -14   68.03  175.68
   9 -17  14 -606.13  173.41
  -9 -17 -14  -53.85  175.82
   9 -17  13  180.44  193.23
   9  17 -13 -156.26  200.83
  -9 -17 -13  279.66  196.62
   9  17 -13  180.11  195.15
   9  17 -13  -49.57  195.05
  -9 -17 -12 1027.56  238.84
   9  17 -12 1010.98  160.27
   9 -17  12 1005.24  118.28
   9 -17  12 1148.10  261.99
   9  17 -12 1067.88  218.36
   9  17 -12  615.61  138.35
   9 -17  11   -3.33  106.81
  -9 -17 -11  299.17  242.87
   9  17 -11  202.43  136.22
   9  17 -11   72.23  154.84
   9  17 -11  -85.58  128.80
   9 -17  11 -383.29  228.15
   9  17 -10 1448.08  178.22
   9  17 -10 1317.43  238.66
   9 -17  10 1319.20  164.30
  -9 -17 -10 1371.22  238.92
   9 -17  10 1110.44  283.04
   9  17 -10 1008.02  162.41
  -9 -17  -9  306.71  216.44
   9 -17   9   76.27  149.18
   9  17  -9  301.19  143.00
   9 -17   9  145.31  207.71
   9  17  -9  512.40  191.37
   9  17  -9  257.36  122.75
   9  17  -8   23.84  149.05
  -9 -17  -8  -14.83  228.05
   9  17  -8   41.04  154.79
   9  17  -8   80.79  118.64
  -9 -17  -7  692.54  212.22
   9  17  -7  709.61  179.78
   9 -17   7  541.88  182.69
   9  17  -7  558.35  149.80
   9  17  -6  280.28  169.51
  -9 -17  -6  166.21  193.86
   9  17  -6   17.80  141.71
   9 -17   5  375.47  165.79
   9  17  -5  315.45  151.53
  -9 -17  -5  327.98  228.44
   9 -17   4  214.59  184.66
  -9  17   4  571.14  170.57
  -9 -17  -4  640.96  239.52
   9  17  -4  387.26  153.12
  -9 -17  -3  156.52  201.37
   9  17  -3  197.01  111.18
  -9  17   3  311.09  136.32
   9 -17   3  193.57  188.42
   9  17  -3  223.64  155.86
   9  17  -2  415.52  137.43
  -9 -17  -2  460.42  217.62
  -9 -17   0 -143.72  141.10
  -9  17   0  -81.28  141.71
  -9  17   0   12.62  142.11
   9  16 -22  -15.09  154.14
   9 -16  22  -78.10  153.39
  -9 -16 -22  -27.26  151.31
   9  16 -22   45.77  154.81
  -9 -16 -22  -87.82  154.08
  -9 -16 -21  124.54  180.26
   9  16 -21 -102.62  179.40
   9  16 -21  183.61  217.13
   9 -16  21   28.42  286.90
  -9 -16 -21   -3.82  196.96
  -9 -16 -20  -69.07  191.66
  -9 -16 -20  -83.11  195.09
   9  16 -20  101.43  195.79
   9  16 -20  106.83  194.37
   9 -16  20 -380.83  192.73
  -9 -16 -19  -16.68  190.63
  -9 -16 -19   50.31  161.17
   9  16 -19  159.96  203.36
   9 -16  19  -18.44  294.46
   9  16 -19  108.93  176.44
   9  16 -18  -65.35  198.05
   9 -16  18   69.56  254.75
  -9 -16 -18  -42.59  147.29
  -9 -16 -18 -120.92  192.26
   9  16 -18  171.05  168.05
   9 -16  17  412.21  254.74
  -9 -16 -17  -93.61  177.45
   9  16 -17  267.75  213.05
   9  16 -17 -151.40  166.28
  -9 -16 -16  171.09  182.38
   9  16 -16  -19.21  156.84
   9 -16  16  302.50  240.03
   9  16 -16   -3.58  207.16
  -9 -16 -16   33.47  145.54
  -9 -16 -15   81.01  149.99
   9  16 -15  -82.43  137.74
   9 -16  15  188.44  210.63
  -9 -16 -15  216.79  178.04
   9  16 -14   75.77   77.14
   9  16 -14  230.14  143.40
   9 -16  14  111.39  195.86
   9  16 -14   71.02  184.49
  -9 -16 -13   97.57  177.14
   9  16 -13 -151.62  176.67
   9 -16  13 -185.82  175.03
  -9 -16 -13   22.25  177.97
   9  16 -13 -103.06  179.15
   9  16 -13   14.07  176.85
   9  16 -12  228.64  140.55
  -9 -16 -12  370.85  187.62
   9 -16  12  700.97  220.39
   9  16 -12  174.74  170.76
   9 -16  12  138.54   80.71
   9  16 -11   -2.03  183.71
   9  16 -11 -148.34  184.63
  -9 -16 -11 -122.23  186.22
   9 -16  11 -374.77  183.25
   9  16 -11   91.02  188.68
   9 -16  11  -36.03  183.98
   9  16 -10   60.33  121.42
   9 -16  10   -1.48  211.55
   9  16 -10  140.54  123.16
   9 -16  10  250.96  126.13
  -9 -16 -10   36.50  195.85
   9  16 -10  -22.72  165.42
   9  16  -9   73.66  133.19
   9 -16   9  134.46  130.38
   9  16  -9  117.14  110.56
   9  16  -9  130.00  159.47
  -9 -16  -9  144.73  212.24
   9 -16   9  -53.65  206.43
  -9 -16  -8  347.36  184.66
   9  16  -8   96.11  135.18
   9  16  -8  253.41  175.35
   9  16  -8   74.07  117.22
   9  16  -7  103.77  115.37
   9 -16   7   54.05  187.00
  -9 -16  -7  408.59  191.14
   9  16  -7   66.21  130.89
   9  16  -7 -118.68  161.32
   9  16  -6 -173.76  185.84
   9 -16   6 -158.20  181.66
   9  16  -6   36.22  187.56
   9  16  -6 -112.39  183.03
  -9 -16  -6 -141.43  182.50
  -9 -16  -5  -61.68  208.22
   9  16  -5 -179.50  214.48
   9  16  -4   19.06  211.91
   9  16  -4  -24.02  207.19
  -9 -16  -4 -266.22  205.35
   9 -16   3  -84.34  218.40
   9  16  -3 -168.46  219.14
  -9 -16  -3  206.43  217.69
   9  16  -3  -45.81  224.96
   9  16  -2  266.78  139.93
  -9 -16  -2  489.34  228.95
  -9 -16   0  156.24  253.71
  -9  16   0  103.69  185.51
   9  15 -23  121.34  170.42
   9  15 -23 -145.88  201.05
  -9 -15 -23 -199.00  184.20
   9 -15  23  411.47  243.59
   9  15 -22   78.56  159.91
  -9 -15 -22  -67.90  159.83
   9  15 -22    7.05  160.45
[truncated: 3,085,140 more chars]
